# Supplementary material for: Transcriptome analysis of flower color reveals the correlation between SNP and differential expression genes in Phalaenopsis
Source: Research Square preprint supplement (doi:10.21203/rs.3.rs-209376/v1), 2021-03-02
Supplement: Supplementary file 3 [file 7e5949d962e06c2dff121f90.xlsx]

## Sheet: DEGs
Table S2 Differential expression genes of six samples
gene_id	baseMean	log2FoldChange	lfcSE	stat	pvalue	padj
LOC110017805	1085.14	1.95389	0.395689	4.93796	7.89e-07	1.83e-05
LOC110017830	440.977	3.65285	0.352589	10.3601	3.77e-25	7.4e-23
LOC110017862	164.194	1.71938	0.281753	6.10243	1.04e-09	3.99e-08
LOC110017874	657.306	1.57652	0.463397	3.4021	0.000668704	0.00708109
LOC110017971	122.762	1.97227	0.486721	4.05216	5.07e-05	0.000776589
LOC110018084	730.292	2.50913	0.646792	3.87935	0.000104737	0.00149173
LOC110018085	132.872	1.67646	0.331116	5.06306	4.13e-07	1.03e-05
LOC110018161	27.888	1.9586	0.522132	3.75117	0.000176014	0.00232168
LOC110018178	97.0771	1.97849	0.432172	4.57801	4.69e-06	9.26e-05
LOC110018184	48.3935	1.66216	0.437749	3.79705	0.000146426	0.00199445
LOC110018185	132.694	1.63898	0.456305	3.59185	0.000328339	0.00395866
LOC110018187	67.6143	1.64797	0.46667	3.53134	0.000413459	0.00482051
LOC110018195	861.745	2.83484	0.435508	6.50927	7.55e-11	3.36e-09
LOC110018196	14.8116	3.78028	0.877039	4.31027	1.63e-05	0.000284497
LOC110018202	107.422	1.50649	0.37872	3.97784	6.95e-05	0.0010312
LOC110018292	301.548	2.56339	0.538562	4.75969	1.94e-06	4.1e-05
LOC110018298	389.95	3.34209	0.629192	5.31173	1.09e-07	3.05e-06
LOC110018337	2790.93	3.11886	0.386283	8.07405	6.8e-16	5.49e-14
LOC110018339	1136.77	2.45454	0.310753	7.89867	2.82e-15	2.19e-13
LOC110018347	70.8153	1.89706	0.448546	4.22936	2.34e-05	0.000394126
LOC110018356	5.19258	5.81015	1.7108	3.39615	0.000683403	0.00717289
LOC110018382	61.2047	9.36512	1.4651	6.39212	1.64e-10	6.94e-09
LOC110018390	67.5398	1.82959	0.402616	4.54425	5.51e-06	0.000107201
LOC110018415	716.649	2.52807	0.712242	3.54945	0.000386036	0.00454879
LOC110018441	1945.48	3.8323	0.412362	9.29353	1.49e-20	1.98e-18
LOC110018457	312.822	4.22603	0.367739	11.4919	1.45e-30	4.06e-28
LOC110018480	92.8107	9.96726	1.38468	7.19826	6.1e-13	3.68e-11
LOC110018505	7.21174	6.28394	1.87775	3.34652	0.000818316	0.00829343
LOC110018506	15.8848	5.53207	1.52978	3.61626	0.000298892	0.00365853
LOC110018535	863.237	2.83839	0.645218	4.39912	1.09e-05	0.000197846
LOC110018547	17.5387	3.08914	0.915006	3.37609	0.00073525	0.007625
LOC110018548	63.1332	4.58814	0.71459	6.42066	1.36e-10	5.82e-09
LOC110018557	1301.63	1.7894	0.413886	4.32341	1.54e-05	0.000270742
LOC110018571	366.982	1.91691	0.288942	6.63424	3.26e-11	1.53e-09
LOC110018608	611.426	4.05887	1.22786	3.30565	0.000947561	0.0093565
LOC110018617	615.652	2.65638	0.520417	5.10433	3.32e-07	8.48e-06
LOC110018637	669.149	3.25376	0.445984	7.29568	2.97e-13	1.84e-11
LOC110018659	643.943	2.03674	0.32031	6.35866	2.04e-10	8.44e-09
LOC110018784	149.117	3.02345	0.443132	6.82289	8.92e-12	4.54e-10
LOC110018793	223.749	2.65913	0.707483	3.75858	0.000170883	0.00226753
LOC110018798	382.24	2.9515	0.319092	9.24968	2.25e-20	2.91e-18
LOC110018860	4969.34	2.17216	0.256767	8.45968	2.68e-17	2.49e-15
LOC110018900	1558.3	3.42246	0.64558	5.30137	1.15e-07	3.2e-06
LOC110018906	18.6409	2.7869	0.741949	3.75619	0.000172521	0.00228241
LOC110018921	104.305	10.1335	1.32423	7.65234	1.97e-14	1.4e-12
LOC110018942	2439.64	3.83917	0.325483	11.7953	4.13e-32	1.33e-29
LOC110018948	39.5848	1.81176	0.447332	4.05014	5.12e-05	0.000781964
LOC110018965	1221.22	4.01887	0.45886	8.75838	1.98e-18	2.02e-16
LOC110018968	130.124	2.01381	0.350573	5.74434	9.23e-09	3.11e-07
LOC110018996	19.2441	3.26377	0.913467	3.57295	0.000352982	0.00421266
LOC110019007	224.166	1.73956	0.468728	3.71123	0.000206255	0.00265131
LOC110019025	160.569	2.28956	0.517221	4.42667	9.57e-06	0.000176198
LOC110019047	544.885	2.40234	0.658918	3.64589	0.000266466	0.00330976
LOC110019049	148.472	4.19177	0.872265	4.80562	1.54e-06	3.33e-05
LOC110019083	1809.11	2.13565	0.190623	11.2035	3.92e-29	1.02e-26
LOC110019099	135.354	3.17553	0.63889	4.97039	6.68e-07	1.57e-05
LOC110019177	25.9051	2.56793	0.6984	3.67688	0.000236106	0.00297871
LOC110019184	141.338	10.5739	1.37233	7.70506	1.31e-14	9.43e-13
LOC110019194	31.1647	1.71773	0.514921	3.3359	0.00085023	0.00854339
LOC110019272	1187.68	2.24301	0.362959	6.1798	6.42e-10	2.52e-08
LOC110019289	246.07	2.23549	0.542076	4.12394	3.72e-05	0.000590941
LOC110019290	577.704	2.13914	0.471096	4.54079	5.6e-06	0.000108262
LOC110019301	26.7147	2.6596	0.745515	3.56747	0.000360447	0.00428457
LOC110019323	242.008	1.72863	0.333789	5.17882	2.23e-07	5.95e-06
LOC110019343	874.799	2.28481	0.448033	5.09964	3.4e-07	8.68e-06
LOC110019345	211.413	2.70005	0.738286	3.65719	0.000254994	0.00318968
LOC110019348	3710.47	2.90828	0.218577	13.3056	2.15e-40	1.41e-37
LOC110019367	601.694	2.24906	0.473066	4.75422	1.99e-06	4.2e-05
LOC110019453	227.65	2.03891	0.407208	5.00704	5.53e-07	1.33e-05
LOC110019471	35.5284	2.72525	0.536811	5.07673	3.84e-07	9.63e-06
LOC110019473	2822.95	1.55044	0.386253	4.01405	5.97e-05	0.000896857
LOC110019525	947.087	4.18962	0.441599	9.48738	2.37e-21	3.25e-19
LOC110019530	20.4908	3.21279	0.787427	4.08011	4.5e-05	0.0006961
LOC110019620	373.625	1.93513	0.531965	3.6377	0.000275086	0.00340964
LOC110019721	502.698	1.789	0.345984	5.17076	2.33e-07	6.18e-06
LOC110019729	140.641	3.06682	0.417351	7.34829	2.01e-13	1.27e-11
LOC110019749	321.838	3.55908	0.348926	10.2001	1.98e-24	3.69e-22
LOC110019757	185.418	1.96595	0.322622	6.09367	1.1e-09	4.19e-08
LOC110019804	115.569	1.59892	0.378911	4.21978	2.45e-05	0.000409689
LOC110019893	52.3392	1.79931	0.436215	4.12482	3.71e-05	0.000589206
LOC110020036	63.5755	4.18086	0.750276	5.57243	2.51e-08	7.7e-07
LOC110020045	846.331	4.82069	0.637501	7.56186	3.97e-14	2.75e-12
LOC110020108	971.157	5.48338	0.279916	19.5893	1.91e-85	3.37e-81
LOC110020162	460.458	2.56948	0.517502	4.96516	6.86e-07	1.6e-05
LOC110020165	502.273	6.09236	0.689305	8.83842	9.71e-19	1.02e-16
LOC110020219	6808.16	2.47078	0.535047	4.61788	3.88e-06	7.79e-05
LOC110020223	132.038	1.51523	0.420158	3.60633	0.000310555	0.00378034
LOC110020226	298.85	2.37837	0.310653	7.65605	1.92e-14	1.36e-12
LOC110020231	1159.68	1.61143	0.325807	4.94598	7.58e-07	1.76e-05
LOC110020234	2169.24	2.80386	0.303002	9.25359	2.17e-20	2.85e-18
LOC110020274	113.595	3.06103	0.4646	6.58854	4.44e-11	2.05e-09
LOC110020403	34.1713	2.50163	0.709713	3.52485	0.000423726	0.00490143
LOC110020427	67.4047	5.30575	1.0434	5.08506	3.68e-07	9.31e-06
LOC110020430	71.6643	3.00569	0.6862	4.3802	1.19e-05	0.000214292
LOC110020431	116.157	1.572	0.290067	5.41945	5.98e-08	1.75e-06
LOC110020443	56.0653	4.99294	1.09891	4.54354	5.53e-06	0.000107327
LOC110020512	10.6788	4.33252	1.14391	3.78748	0.000152184	0.00206435
LOC110020530	744.949	5.44296	1.1099	4.90399	9.39e-07	2.13e-05
LOC110020601	270.972	1.50129	0.301355	4.98179	6.3e-07	1.49e-05
LOC110020627	488.703	2.77458	0.491925	5.64024	1.7e-08	5.39e-07
LOC110020641	186.485	4.40664	0.400586	11.0005	3.8e-28	9.2e-26
LOC110020698	13.8002	4.29994	1.16785	3.68194	0.000231462	0.00293478
LOC110020773	4352.51	1.8868	0.307795	6.13006	8.78e-10	3.38e-08
LOC110020775	312.478	1.98005	0.340456	5.81588	6.03e-09	2.09e-07
LOC110020820	325.28	4.22505	0.607123	6.95913	3.42e-12	1.86e-10
LOC110020832	287.582	5.46619	0.708955	7.71021	1.26e-14	9.1e-13
LOC110020866	679.511	1.66061	0.476451	3.48538	0.000491443	0.00552037
LOC110020868	1192.16	2.33908	0.416806	5.61192	2e-08	6.24e-07
LOC110020906	54.7666	3.41798	0.79455	4.30177	1.69e-05	0.000294185
LOC110020963	163.964	4.985	0.44741	11.1419	7.84e-29	2.01e-26
LOC110020966	128.065	2.08933	0.480413	4.34903	1.37e-05	0.000243398
LOC110020992	1434.85	1.79862	0.358664	5.01479	5.31e-07	1.29e-05
LOC110021012	6.39613	5.10423	1.54579	3.30203	0.000959884	0.00945179
LOC110021098	86.5253	1.7981	0.51287	3.50595	0.00045498	0.00519159
LOC110021108	159.833	2.38523	0.408945	5.83264	5.46e-09	1.89e-07
LOC110021138	365.797	2.23885	0.304108	7.36203	1.81e-13	1.15e-11
LOC110021163	1301.08	2.56144	0.664559	3.85434	0.000116041	0.00163168
LOC110021172	393.53	4.46374	0.372549	11.9816	4.44e-33	1.54e-30
LOC110021174	107.923	2.51677	0.402263	6.25652	3.94e-10	1.59e-08
LOC110021188	142.973	2.17018	0.377437	5.74977	8.94e-09	3.02e-07
LOC110021204	430.035	1.97842	0.296207	6.67919	2.4e-11	1.13e-09
LOC110021235	39.2851	2.78047	0.730411	3.80672	0.000140824	0.001931
LOC110021263	104.09	9.16796	1.44282	6.3542	2.1e-10	8.67e-09
LOC110021266	2642.79	3.20137	0.466836	6.85759	7e-12	3.65e-10
LOC110021306	1070.56	4.06023	0.59844	6.7847	1.16e-11	5.86e-10
LOC110021313	555.375	1.65675	0.424709	3.90091	9.58e-05	0.00138049
LOC110021324	3641.29	1.74168	0.318092	5.47541	4.37e-08	1.31e-06
LOC110021397	32.9512	2.76768	0.803197	3.44583	0.000569318	0.00622692
LOC110021408	114.419	1.76584	0.365007	4.83783	1.31e-06	2.87e-05
LOC110021452	16.2842	5.56379	1.68705	3.29793	0.000974003	0.00956158
LOC110021493	887.978	2.07627	0.391616	5.3018	1.15e-07	3.2e-06
LOC110021501	189.685	10.9976	1.22372	8.98699	2.54e-19	2.88e-17
LOC110021527	1477.97	3.01532	0.506391	5.95453	2.61e-09	9.54e-08
LOC110021539	782.408	4.70599	0.456685	10.3047	6.71e-25	1.28e-22
LOC110021600	374.371	4.10515	0.674081	6.08999	1.13e-09	4.27e-08
LOC110021605	2364.83	4.5794	0.560359	8.17226	3.03e-16	2.55e-14
LOC110021606	1710.45	4.11116	0.531257	7.73856	1.01e-14	7.37e-13
LOC110021641	132.911	2.45303	0.35259	6.95717	3.47e-12	1.88e-10
LOC110021667	130.526	2.52536	0.628139	4.02038	5.81e-05	0.00087551
LOC110021668	324.115	1.81212	0.342445	5.2917	1.21e-07	3.36e-06
LOC110021675	2368.84	2.37029	0.498491	4.75493	1.99e-06	4.19e-05
LOC110021707	755.898	3.90479	0.46401	8.41531	3.92e-17	3.61e-15
LOC110021736	759.168	2.251	0.524516	4.29157	1.77e-05	0.000306534
LOC110021747	108.309	2.28001	0.363359	6.27482	3.5e-10	1.43e-08
LOC110021804	197.231	2.12573	0.285045	7.45754	8.82e-14	5.88e-12
LOC110021827	815.607	2.34361	0.426329	5.49717	3.86e-08	1.16e-06
LOC110021831	480.774	2.9479	0.426123	6.91796	4.58e-12	2.45e-10
LOC110021844	96.6147	2.45627	0.717645	3.42269	0.000620054	0.00666634
LOC110021855	200.124	1.65207	0.337451	4.89574	9.79e-07	2.21e-05
LOC110021974	1364.39	2.23843	0.605923	3.69425	0.00022054	0.00281651
LOC110021977	160.683	2.7649	0.781429	3.53826	0.000402772	0.00471457
LOC110022012	1349.52	1.87171	0.385243	4.85852	1.18e-06	2.62e-05
LOC110022050	51.5747	1.53422	0.466149	3.29127	0.000997366	0.00975564
LOC110022099	58.6609	2.8458	0.534219	5.32703	9.98e-08	2.83e-06
LOC110022157	73.5811	2.26972	0.666822	3.40379	0.000664582	0.00705919
LOC110022164	38.891	3.54094	0.718112	4.9309	8.19e-07	1.89e-05
LOC110022191	566.341	1.97377	0.263872	7.48005	7.43e-14	5e-12
LOC110022203	197.855	1.84848	0.381538	4.84482	1.27e-06	2.79e-05
LOC110022209	33.906	3.01549	0.636043	4.74102	2.13e-06	4.45e-05
LOC110022219	1604.76	3.52745	0.654279	5.39135	6.99e-08	2.02e-06
LOC110022221	450.526	1.72079	0.318177	5.40828	6.36e-08	1.86e-06
LOC110022258	299.158	2.28422	0.617718	3.69784	0.000217438	0.00278091
LOC110022324	282.866	1.85482	0.554707	3.34378	0.000826466	0.00835564
LOC110022361	185.623	3.53763	0.600989	5.88634	3.95e-09	1.4e-07
LOC110022393	1245.78	4.23168	0.358474	11.8047	3.69e-32	1.21e-29
LOC110022396	469.319	4.50827	0.673473	6.69405	2.17e-11	1.03e-09
LOC110022418	82.9643	4.11433	0.601283	6.84259	7.78e-12	4.04e-10
LOC110022424	70.3348	4.23489	0.627453	6.74933	1.49e-11	7.33e-10
LOC110022430	48.0005	1.50452	0.427846	3.51651	0.000437266	0.00502333
LOC110022453	6.10281	6.04302	1.75147	3.45025	0.000560059	0.00615995
LOC110022476	2447.38	1.64194	0.319741	5.13522	2.82e-07	7.33e-06
LOC110022556	3262.85	4.91168	0.531016	9.24957	2.25e-20	2.91e-18
LOC110022560	170.053	4.50487	0.842943	5.34422	9.08e-08	2.6e-06
LOC110022568	44.2197	3.11695	0.722045	4.31683	1.58e-05	0.000277271
LOC110022599	836.553	5.068	0.650562	7.79019	6.69e-15	5.05e-13
LOC110022625	2021.18	5.16179	0.527877	9.77839	1.39e-22	2.26e-20
LOC110022640	98.0384	2.4917	0.501938	4.96415	6.9e-07	1.61e-05
LOC110022671	198.951	1.57936	0.403244	3.91665	8.98e-05	0.00130405
LOC110022686	30.427	3.57237	0.843335	4.236	2.28e-05	0.000384115
LOC110022729	34.5131	3.55729	0.745441	4.77206	1.82e-06	3.89e-05
LOC110022730	90.7756	4.39554	0.801923	5.48125	4.22e-08	1.27e-06
LOC110022731	13.8092	4.71237	1.11498	4.2264	2.37e-05	0.000398964
LOC110022743	67.698	2.03145	0.464942	4.36925	1.25e-05	0.000224173
LOC110022770	37.5995	7.69591	1.36284	5.64695	1.63e-08	5.22e-07
LOC110022820	34.3626	3.1978	0.75409	4.24061	2.23e-05	0.000378117
LOC110022840	19.6729	5.2476	1.06027	4.94929	7.45e-07	1.73e-05
LOC110022897	667.953	2.45454	0.213712	11.4853	1.56e-30	4.32e-28
LOC110022900	116.928	1.56339	0.342986	4.55817	5.16e-06	0.000100666
LOC110022915	1934.04	1.79401	0.535882	3.34776	0.000814678	0.00827078
LOC110022952	68.617	3.21499	0.726933	4.42267	9.75e-06	0.000178932
LOC110022984	287.928	2.4184	0.26706	9.05563	1.36e-19	1.58e-17
LOC110022992	977.346	3.15323	0.560262	5.62812	1.82e-08	5.74e-07
LOC110022998	59.4422	3.42196	0.912741	3.74911	0.000177466	0.0023356
LOC110023020	251.169	1.92416	0.435579	4.41746	9.99e-06	0.000182915
LOC110023124	3556.62	2.68344	0.315844	8.49609	1.96e-17	1.84e-15
LOC110023156	405.631	3.90636	0.542843	7.19612	6.19e-13	3.72e-11
LOC110023168	151.971	3.15009	0.410823	7.66775	1.75e-14	1.25e-12
LOC110023223	8381.13	3.90397	0.29253	13.3455	1.26e-40	8.55e-38
LOC110023226	658.753	1.65574	0.247122	6.7001	2.08e-11	1e-09
LOC110023237	221.688	2.62491	0.509846	5.14844	2.63e-07	6.88e-06
LOC110023244	85.9142	4.39076	0.939393	4.67404	2.95e-06	6.03e-05
LOC110023248	203.966	2.02591	0.596711	3.39513	0.00068596	0.00718692
LOC110023288	473.449	5.85636	0.608317	9.62716	6.14e-22	9.04e-20
LOC110023293	230.37	2.78938	0.473332	5.89307	3.79e-09	1.35e-07
LOC110023294	300.918	1.59313	0.419579	3.79699	0.000146466	0.00199445
LOC110023375	2022.1	2.39507	0.286804	8.35089	6.78e-17	6.08e-15
LOC110023406	155.782	1.83045	0.469601	3.89789	9.7e-05	0.00139552
LOC110023418	179.003	3.80088	0.35717	10.6417	1.91e-26	4.11e-24
LOC110023449	1229.28	1.53594	0.344297	4.46109	8.15e-06	0.000152037
LOC110023451	62.5825	1.85863	0.549362	3.38326	0.00071632	0.00745639
LOC110023505	31.5041	7.43542	1.65449	4.49409	6.99e-06	0.0001325
LOC110023522	1082.27	2.91853	0.621101	4.69896	2.61e-06	5.38e-05
LOC110023537	116.745	4.22209	0.663838	6.36011	2.02e-10	8.38e-09
LOC110023560	1920.28	2.33776	0.42813	5.4604	4.75e-08	1.42e-06
LOC110023635	24.7588	4.33329	0.838906	5.16541	2.4e-07	6.33e-06
LOC110023671	1508.4	2.02159	0.295488	6.84152	7.84e-12	4.06e-10
LOC110023673	329.458	6.21749	0.383456	16.2144	3.99e-59	7.78e-56
LOC110023677	201.021	1.52717	0.396787	3.84883	0.000118685	0.00166357
LOC110023725	3703.46	3.79501	0.318383	11.9196	9.35e-33	3.18e-30
LOC110023726	2367.02	6.83753	0.719018	9.50954	1.92e-21	2.66e-19
LOC110023759	106.926	3.30331	0.722337	4.57309	4.81e-06	9.45e-05
LOC110023763	1346.17	2.06333	0.361181	5.71273	1.11e-08	3.68e-07
LOC110023786	755.796	1.68024	0.341021	4.9271	8.35e-07	1.92e-05
LOC110023847	705.187	2.34227	0.547813	4.27569	1.91e-05	0.000327305
LOC110023865	121.455	1.82853	0.307206	5.95212	2.65e-09	9.67e-08
LOC110023869	71.1051	2.88587	0.661828	4.36045	1.3e-05	0.000232195
LOC110023892	294.067	2.55918	0.456101	5.61099	2.01e-08	6.25e-07
LOC110024013	1470.55	2.39936	0.204329	11.7426	7.7e-32	2.39e-29
LOC110024023	145.053	1.93145	0.411015	4.69921	2.61e-06	5.38e-05
LOC110024030	103.384	4.06847	0.516208	7.88146	3.24e-15	2.5e-13
LOC110024123	577.699	6.82433	0.559464	12.198	3.19e-34	1.17e-31
LOC110024201	1318.86	1.60793	0.23053	6.97494	3.06e-12	1.67e-10
LOC110024213	563.119	1.58223	0.198191	7.98337	1.42e-15	1.14e-13
LOC110024219	3282.38	2.51707	0.290142	8.67529	4.13e-18	4.14e-16
LOC110024220	735.759	2.25271	0.64609	3.48668	0.000489063	0.00549885
LOC110024221	81.6755	4.95648	0.994382	4.98448	6.21e-07	1.48e-05
LOC110024232	63.0791	2.27528	0.60405	3.76671	0.000165414	0.00220885
LOC110024238	114.948	3.18149	0.482831	6.58924	4.42e-11	2.05e-09
LOC110024364	451.011	1.93688	0.548611	3.53052	0.000414738	0.00483223
LOC110024419	440.4	1.82889	0.287505	6.36126	2e-10	8.34e-09
LOC110024430	68.8826	3.11643	0.788842	3.95064	7.79e-05	0.00114323
LOC110024440	1781.62	5.64042	0.468986	12.0268	2.57e-33	9.08e-31
LOC110024488	919.062	4.83385	0.361791	13.3609	1.02e-40	7.24e-38
LOC110024494	210.158	1.70238	0.312929	5.44014	5.32e-08	1.58e-06
LOC110024570	235.412	3.3334	0.568928	5.85909	4.65e-09	1.64e-07
LOC110024571	166.592	2.0636	0.386427	5.3402	9.28e-08	2.65e-06
LOC110024596	176.077	4.12835	0.443319	9.31237	1.25e-20	1.67e-18
LOC110024607	733.389	3.41745	0.529501	6.45411	1.09e-10	4.73e-09
LOC110024608	251.38	5.33073	0.560599	9.509	1.93e-21	2.66e-19
LOC110024609	2489.2	5.61324	0.427126	13.1419	1.89e-39	1.15e-36
LOC110024628	21.4687	3.89857	1.05788	3.68525	0.000228475	0.00290524
LOC110024670	1019.13	2.0642	0.338545	6.09726	1.08e-09	4.11e-08
LOC110024739	723.128	2.21886	0.329424	6.73557	1.63e-11	8.02e-10
LOC110024760	687.978	2.04433	0.364231	5.61273	1.99e-08	6.23e-07
LOC110024792	43.6174	6.43644	1.41011	4.56451	5.01e-06	9.81e-05
LOC110024830	92.3932	1.84277	0.387765	4.75228	2.01e-06	4.23e-05
LOC110024847	52.2109	2.17857	0.61638	3.53447	0.0004086	0.00477962
LOC110024859	9.73455	5.73041	1.53003	3.7453	0.000180178	0.00236777
LOC110024895	2851.14	2.93045	0.288107	10.1714	2.66e-24	4.8e-22
LOC110024899	357.751	3.23416	0.442378	7.31085	2.65e-13	1.65e-11
LOC110024910	1112.94	7.15157	0.419746	17.0379	4.3e-65	1.52e-61
LOC110024926	203.072	1.7046	0.389225	4.37947	1.19e-05	0.00021479
LOC110024953	89.4604	2.70834	0.587341	4.6112	4e-06	8.01e-05
LOC110024990	31.8543	7.45272	1.43633	5.18873	2.12e-07	5.65e-06
LOC110025017	179.447	10.9171	1.25557	8.69494	3.47e-18	3.52e-16
LOC110025025	213.033	2.55622	0.344929	7.41086	1.25e-13	8.18e-12
LOC110025033	208.796	2.02851	0.379778	5.34132	9.23e-08	2.63e-06
LOC110025054	233.877	5.13483	0.657121	7.81413	5.53e-15	4.22e-13
LOC110025081	583.928	1.86934	0.414904	4.50549	6.62e-06	0.000126397
LOC110025088	65.4211	3.95848	0.706437	5.60344	2.1e-08	6.49e-07
LOC110025233	1025.39	1.77937	0.300755	5.91635	3.29e-09	1.18e-07
LOC110025348	5593.19	4.35203	0.27929	15.5825	9.57e-55	1.21e-51
LOC110025378	516.89	1.97492	0.485113	4.07106	4.68e-05	0.000722446
LOC110025381	64.6391	2.64153	0.426577	6.19239	5.93e-10	2.34e-08
LOC110025382	429.077	1.85878	0.370086	5.02256	5.1e-07	1.24e-05
LOC110025391	563.936	2.91702	0.217686	13.4001	6.04e-41	4.45e-38
LOC110025466	57.6387	3.26307	0.858861	3.7993	0.000145107	0.00198358
LOC110025502	684.887	2.17765	0.37937	5.74017	9.46e-09	3.18e-07
LOC110025506	108.74	1.57825	0.314258	5.02215	5.11e-07	1.24e-05
LOC110025508	963.338	2.41747	0.425715	5.67862	1.36e-08	4.42e-07
LOC110025513	105.466	1.63998	0.3971	4.12989	3.63e-05	0.000577908
LOC110025543	246.216	1.78384	0.31745	5.61928	1.92e-08	6.02e-07
LOC110025580	95.6866	1.56761	0.383359	4.08914	4.33e-05	0.000675454
LOC110025582	2313.37	2.32946	0.271423	8.58242	9.29e-18	8.97e-16
LOC110025635	381.472	2.78083	0.427676	6.50218	7.92e-11	3.51e-09
LOC110025668	89.1022	2.80229	0.610111	4.59308	4.37e-06	8.68e-05
LOC110025788	193.346	3.01011	0.50804	5.92494	3.12e-09	1.12e-07
LOC110025852	26.4322	2.69276	0.775714	3.47133	0.000517889	0.00576428
LOC110025855	18.9664	3.1876	0.963476	3.30844	0.000938189	0.00928471
LOC110025909	20.8634	5.32809	1.25851	4.23364	2.3e-05	0.00038781
LOC110025972	381.642	2.1563	0.373012	5.78078	7.44e-09	2.55e-07
LOC110025983	489.409	1.73095	0.437024	3.96076	7.47e-05	0.00109859
LOC110026007	1084.55	2.30799	0.469947	4.91119	9.05e-07	2.06e-05
LOC110026021	244.894	1.80463	0.302403	5.96761	2.41e-09	8.83e-08
LOC110026048	567.688	3.899	0.637315	6.11785	9.48e-10	3.64e-08
LOC110026134	134.362	3.66452	0.677583	5.40823	6.36e-08	1.86e-06
LOC110026137	529.489	3.66584	0.423992	8.64602	5.33e-18	5.3e-16
LOC110026226	6306.18	2.80345	0.340877	8.22423	1.96e-16	1.66e-14
LOC110026290	17.0293	3.55718	1.0069	3.53282	0.00041116	0.00480321
LOC110026306	1508.06	1.59868	0.462317	3.45798	0.000544235	0.0060121
LOC110026338	185.418	5.90179	0.660296	8.93809	3.96e-19	4.35e-17
LOC110026381	70.1974	2.26879	0.4691	4.83648	1.32e-06	2.88e-05
LOC110026383	102.905	2.35733	0.533966	4.41476	1.01e-05	0.000185027
LOC110026388	44.7978	2.12907	0.63636	3.3457	0.000820753	0.00831015
LOC110026391	3197.96	2.03304	0.176427	11.5234	1.01e-30	2.87e-28
LOC110026402	32.922	2.11322	0.514797	4.10496	4.04e-05	0.000637034
LOC110026447	54.4678	2.23029	0.396307	5.62769	1.83e-08	5.74e-07
LOC110026468	94.0064	2.96311	0.594131	4.98729	6.12e-07	1.46e-05
LOC110026542	1393.15	2.91825	0.228996	12.7437	3.38e-37	1.61e-34
LOC110026568	1183.4	1.59522	0.316309	5.04323	4.58e-07	1.12e-05
LOC110026593	105.435	2.96958	0.872341	3.40415	0.000663694	0.00705399
LOC110026595	31.1728	3.19441	0.940758	3.39557	0.000684858	0.0071839
LOC110026642	2963.81	2.32452	0.643028	3.61496	0.000300392	0.00367181
LOC110026658	208.778	2.07984	0.551026	3.77449	0.000160336	0.00215181
LOC110026663	5209.64	1.79594	0.294229	6.10388	1.04e-09	3.96e-08
LOC110026674	349.559	1.86097	0.489474	3.80197	0.000143547	0.00196682
LOC110026797	35.0489	2.31894	0.555848	4.17189	3.02e-05	0.000493474
LOC110026801	75.9057	3.45542	0.591591	5.84089	5.19e-09	1.82e-07
LOC110026841	106.683	1.56407	0.456884	3.42335	0.000618535	0.00666217
LOC110026855	166.512	2.25678	0.544797	4.14242	3.44e-05	0.000550855
LOC110026863	525.825	1.91972	0.294806	6.51183	7.42e-11	3.33e-09
LOC110026915	204.16	4.0461	0.892221	4.53486	5.76e-06	0.000111101
LOC110026918	19.1681	2.97218	0.816884	3.63844	0.0002743	0.00340228
LOC110026935	1981.97	2.22361	0.447658	4.96721	6.79e-07	1.59e-05
LOC110027019	59.6644	3.37773	0.60518	5.58137	2.39e-08	7.32e-07
LOC110027028	443.82	4.5072	0.36585	12.3198	7.09e-35	2.72e-32
LOC110027075	836.108	1.73946	0.398879	4.36088	1.3e-05	0.00023198
LOC110027078	689.948	2.1827	0.361432	6.03902	1.55e-09	5.79e-08
LOC110027081	111.592	2.13004	0.532591	3.99939	6.35e-05	0.000950453
LOC110027082	52.0296	3.77335	0.502131	7.51467	5.71e-14	3.92e-12
LOC110027083	2026.82	4.44078	0.269652	16.4686	6.17e-61	1.36e-57
LOC110027150	64.6264	2.43845	0.427025	5.71033	1.13e-08	3.71e-07
LOC110027194	1683.07	5.2267	0.545951	9.57357	1.03e-21	1.48e-19
LOC110027212	159.024	1.75153	0.52368	3.34466	0.000823833	0.00833501
LOC110027245	637.726	4.1427	0.470907	8.79728	1.4e-18	1.45e-16
LOC110027263	126.681	2.48101	0.636286	3.89921	9.65e-05	0.00138909
LOC110027264	763.301	4.02168	1.10625	3.63542	0.000277529	0.0034327
LOC110027292	5643.39	2.227	0.522877	4.25912	2.05e-05	0.000349811
LOC110027325	56.6159	1.98156	0.431472	4.59256	4.38e-06	8.7e-05
LOC110027326	1206.96	1.58023	0.268754	5.87985	4.11e-09	1.46e-07
LOC110027349	2702.56	3.02204	0.557428	5.4214	5.91e-08	1.74e-06
LOC110027406	161.215	1.63944	0.378446	4.33202	1.48e-05	0.000261402
LOC110027413	1152.29	2.72971	0.374864	7.28187	3.29e-13	2.03e-11
LOC110027443	133.559	4.66708	0.490819	9.50876	1.93e-21	2.66e-19
LOC110027496	1821.11	3.33077	0.409331	8.13709	4.05e-16	3.36e-14
LOC110027503	300.872	3.60021	0.684293	5.26121	1.43e-07	3.95e-06
LOC110027506	74.0105	1.97297	0.560967	3.51708	0.000436321	0.00502081
LOC110027562	261.477	4.42837	0.678506	6.52665	6.73e-11	3.02e-09
LOC110027563	28.4222	4.1198	1.25065	3.29413	0.000987284	0.00967845
LOC110027591	77.8392	2.47421	0.660565	3.7456	0.000179963	0.00236671
LOC110027595	63.1457	2.15584	0.499567	4.31541	1.59e-05	0.000278787
LOC110027621	39.9044	3.09525	0.74494	4.15503	3.25e-05	0.000525945
LOC110027633	25.777	2.56274	0.62649	4.09064	4.3e-05	0.000672295
LOC110027699	44.6663	2.50399	0.747787	3.34854	0.000812384	0.00826498
LOC110027827	17.5891	2.71151	0.76889	3.52653	0.000421047	0.00488641
LOC110027851	84.9589	2.5262	0.663134	3.80949	0.000139252	0.0019139
LOC110027908	1438.67	3.86397	0.250743	15.4101	1.4e-53	1.55e-50
LOC110027985	998.149	2.90237	0.319899	9.07275	1.16e-19	1.38e-17
LOC110028048	555.92	1.9656	0.280568	7.00581	2.46e-12	1.36e-10
LOC110028064	164.819	2.1481	0.296855	7.23621	4.61e-13	2.82e-11
LOC110028074	127.721	1.66099	0.372189	4.46276	8.09e-06	0.000151017
LOC110028081	2660.08	2.23359	0.344555	6.48254	9.02e-11	3.99e-09
LOC110028110	110.126	1.98731	0.424047	4.68655	2.78e-06	5.7e-05
LOC110028115	210.365	1.52869	0.312413	4.89316	9.92e-07	2.24e-05
LOC110028142	313.112	1.88992	0.388392	4.866	1.14e-06	2.53e-05
LOC110028157	92.2023	2.49683	0.755765	3.30372	0.000954125	0.0094108
LOC110028161	1372.53	1.5923	0.359052	4.43473	9.22e-06	0.000170797
LOC110028166	1481.57	2.6824	0.337048	7.95851	1.74e-15	1.38e-13
LOC110028229	293.155	2.9322	0.421978	6.94869	3.69e-12	1.99e-10
LOC110028245	784.995	3.00659	0.467743	6.42787	1.29e-10	5.57e-09
LOC110028286	450.74	3.22005	0.493245	6.5283	6.65e-11	3e-09
LOC110028287	284.571	1.70806	0.367969	4.64186	3.45e-06	6.97e-05
LOC110028290	33.9512	3.0711	0.800269	3.83758	0.000124252	0.00173062
LOC110028348	2393.85	1.70179	0.253132	6.72292	1.78e-11	8.7e-10
LOC110028358	101.753	3.84349	0.554989	6.92534	4.35e-12	2.34e-10
LOC110028363	659.905	2.97866	0.483672	6.15843	7.35e-10	2.87e-08
LOC110028416	70.2185	2.32026	0.517779	4.48119	7.42e-06	0.000140171
LOC110028434	133.008	2.5385	0.429784	5.90645	3.5e-09	1.25e-07
LOC110028464	1300.14	2.74929	0.527209	5.2148	1.84e-07	4.96e-06
LOC110028485	7985.28	2.50425	0.301409	8.30849	9.69e-17	8.57e-15
LOC110028544	459.07	2.07859	0.419989	4.94916	7.45e-07	1.73e-05
LOC110028568	3607.63	5.55753	0.382093	14.545	6.29e-48	6.54e-45
LOC110028589	1330.96	2.01553	0.345512	5.83347	5.43e-09	1.89e-07
LOC110028628	921.653	3.62548	0.410039	8.8418	9.42e-19	9.91e-17
LOC110028691	2025.74	4.8177	0.465606	10.3472	4.31e-25	8.37e-23
LOC110028699	7753.42	1.50156	0.319344	4.70203	2.58e-06	5.31e-05
LOC110028720	117.588	3.61789	0.725434	4.9872	6.13e-07	1.46e-05
LOC110028815	40.0048	2.62716	0.545682	4.81445	1.48e-06	3.2e-05
LOC110028837	441.868	3.39467	0.533326	6.3651	1.95e-10	8.15e-09
LOC110028872	73.0589	2.04114	0.453984	4.49607	6.92e-06	0.000131555
LOC110028873	77.7571	2.94946	0.486306	6.06502	1.32e-09	4.97e-08
LOC110028905	42.7089	2.35539	0.626132	3.76182	0.000168682	0.00224339
LOC110028917	224.151	3.87354	0.467864	8.2792	1.24e-16	1.09e-14
LOC110028928	369.232	1.75963	0.348801	5.0448	4.54e-07	1.11e-05
LOC110028958	581.795	3.16234	0.204655	15.452	7.31e-54	8.62e-51
LOC110028964	377.562	1.54119	0.347429	4.43599	9.17e-06	0.000170162
LOC110028970	673.801	1.77106	0.24948	7.099	1.26e-12	7.48e-11
LOC110028989	250.007	2.30364	0.658586	3.49787	0.000468997	0.00531039
LOC110029003	366.764	1.83126	0.277958	6.58826	4.45e-11	2.05e-09
LOC110029009	56.3472	4.61685	1.06646	4.32912	1.5e-05	0.000264605
LOC110029040	240.51	2.97556	0.575678	5.16879	2.36e-07	6.22e-06
LOC110029084	82.4242	4.6974	0.863373	5.44075	5.31e-08	1.57e-06
LOC110029108	81.4077	3.60049	0.435846	8.26091	1.45e-16	1.25e-14
LOC110029174	66.1797	1.56907	0.369296	4.24881	2.15e-05	0.000365601
LOC110029179	120.606	1.53038	0.345989	4.42321	9.72e-06	0.000178674
LOC110029195	134.366	2.64945	0.574855	4.6089	4.05e-06	8.09e-05
LOC110029209	258.38	2.1046	0.505953	4.15968	3.19e-05	0.000516776
LOC110029217	228.515	3.4432	0.411585	8.36572	5.97e-17	5.39e-15
LOC110029221	2211.79	4.22829	0.396775	10.6566	1.62e-26	3.54e-24
LOC110029229	401.643	4.53636	0.788537	5.75288	8.77e-09	2.97e-07
LOC110029310	241.544	2.27969	0.541391	4.2108	2.54e-05	0.000424305
LOC110029367	58.0639	2.56111	0.473947	5.40379	6.52e-08	1.9e-06
LOC110029376	38.423	2.31096	0.656505	3.52009	0.000431402	0.00497068
LOC110029439	729.102	2.43461	0.547912	4.44343	8.85e-06	0.000164549
LOC110029447	16.2563	6.48019	1.49576	4.33236	1.48e-05	0.000261264
LOC110029450	1059.64	1.6022	0.282154	5.67848	1.36e-08	4.42e-07
LOC110029469	328.091	7.21497	0.582081	12.3951	2.78e-35	1.12e-32
LOC110029484	1656.2	2.60395	0.319667	8.14582	3.77e-16	3.14e-14
LOC110029490	62.2981	1.90776	0.57501	3.31778	0.000907345	0.00901987
LOC110029507	239.084	4.14468	0.396933	10.4418	1.6e-25	3.21e-23
LOC110029572	99.5621	1.58161	0.463567	3.41182	0.000645311	0.00688616
LOC110029610	14.3382	2.903	0.862425	3.36609	0.000762424	0.00786198
LOC110029639	430.389	1.57354	0.373826	4.20928	2.56e-05	0.000426776
LOC110029660	13.0248	4.20793	1.17024	3.59578	0.000323427	0.00391815
LOC110029709	134.926	2.44072	0.376899	6.47581	9.43e-11	4.16e-09
LOC110029720	414.024	2.95599	0.439546	6.72509	1.75e-11	8.59e-10
LOC110029796	42.9432	1.98981	0.527518	3.77203	0.000161924	0.00216983
LOC110029819	1040.03	2.7303	0.422875	6.45651	1.07e-10	4.67e-09
LOC110029837	195.633	2.43984	0.471861	5.17068	2.33e-07	6.18e-06
LOC110029866	243.836	1.95585	0.496038	3.94295	8.05e-05	0.00117667
LOC110029880	48.5251	2.07066	0.57616	3.59389	0.000325772	0.00393039
LOC110029924	57.6186	2.86509	0.705535	4.06087	4.89e-05	0.000752074
LOC110029949	610.279	7.3116	0.662177	11.0418	2.4e-28	5.9e-26
LOC110029950	132.277	6.13276	0.864283	7.09578	1.29e-12	7.63e-11
LOC110029951	4643.67	4.7449	0.465822	10.1861	2.29e-24	4.17e-22
LOC110029977	177.679	4.06055	0.393147	10.3283	5.25e-25	1.01e-22
LOC110029984	543.742	1.66466	0.379847	4.38245	1.17e-05	0.000212523
LOC110029998	627.847	3.72665	0.412401	9.03648	1.62e-19	1.87e-17
LOC110030005	1314.75	3.21878	0.313906	10.2539	1.14e-24	2.14e-22
LOC110030010	93.9284	1.80257	0.355595	5.06915	4e-07	9.96e-06
LOC110030016	112.396	2.66776	0.565046	4.72131	2.34e-06	4.87e-05
LOC110030059	240.544	1.71318	0.435439	3.93437	8.34e-05	0.00121549
LOC110030067	14.1342	6.27298	1.66968	3.757	0.000171961	0.00227908
LOC110030105	183.886	2.80186	0.453114	6.18357	6.27e-10	2.47e-08
LOC110030261	73.7574	3.74274	0.86934	4.30527	1.67e-05	0.000290144
LOC110030302	555.074	3.16532	0.426825	7.41596	1.21e-13	7.9e-12
LOC110030318	829.113	2.60728	0.531735	4.90334	9.42e-07	2.14e-05
LOC110030337	486.185	3.09034	0.319448	9.67401	3.89e-22	5.92e-20
LOC110030359	461.94	2.57738	0.319158	8.07558	6.72e-16	5.44e-14
LOC110030361	16.7213	5.01659	1.13313	4.42721	9.55e-06	0.00017594
LOC110030533	119.266	2.21723	0.393742	5.63117	1.79e-08	5.65e-07
LOC110030540	726.829	1.79566	0.474642	3.78319	0.000154834	0.00209387
LOC110030558	42.4355	1.85358	0.471884	3.92803	8.56e-05	0.00124692
LOC110030567	525.316	2.46924	0.256633	9.62167	6.48e-22	9.46e-20
LOC110030612	93.3936	1.99106	0.494007	4.03042	5.57e-05	0.000842536
LOC110030681	77.7089	2.65756	0.547765	4.85164	1.22e-06	2.71e-05
LOC110030695	384.155	2.32031	0.381521	6.08176	1.19e-09	4.49e-08
LOC110030709	76.764	2.33184	0.43013	5.42125	5.92e-08	1.74e-06
LOC110030760	922.249	1.9062	0.292758	6.51118	7.46e-11	3.34e-09
LOC110030765	1470.18	4.03258	0.287116	14.0451	8.25e-45	6.95e-42
LOC110030774	645.027	2.49529	0.355664	7.01586	2.29e-12	1.28e-10
LOC110030781	373.195	3.2626	0.441749	7.38565	1.52e-13	9.79e-12
LOC110030797	24.6538	3.78569	0.756649	5.00323	5.64e-07	1.36e-05
LOC110030811	28.8935	2.12063	0.563003	3.76664	0.00016546	0.00220885
LOC110030866	692.692	1.71746	0.382029	4.49563	6.94e-06	0.000131689
LOC110030934	1725.68	2.17703	0.308368	7.05984	1.67e-12	9.69e-11
LOC110030961	709.49	2.97087	0.579283	5.12853	2.92e-07	7.56e-06
LOC110030962	191.835	6.32307	0.740203	8.54235	1.32e-17	1.26e-15
LOC110030989	781.522	2.70469	0.515143	5.25036	1.52e-07	4.15e-06
LOC110031078	77.2754	2.21161	0.58876	3.75639	0.000172381	0.00228228
LOC110031081	26.4367	8.15234	1.48119	5.50392	3.71e-08	1.12e-06
LOC110031182	385.94	1.86321	0.277412	6.7164	1.86e-11	9e-10
LOC110031195	123.894	3.15122	0.448526	7.02573	2.13e-12	1.2e-10
LOC110031245	609.711	2.67476	0.421955	6.33899	2.31e-10	9.55e-09
LOC110031303	795.971	3.1196	0.674114	4.6277	3.7e-06	7.44e-05
LOC110031356	9.27694	5.65572	1.71719	3.29358	0.000989203	0.00968652
LOC110031362	581.071	6.35482	1.13348	5.60645	2.07e-08	6.4e-07
LOC110031374	1335.97	4.20384	0.588579	7.14236	9.17e-13	5.5e-11
LOC110031444	1722.51	2.07063	0.590434	3.50695	0.000453269	0.0051754
LOC110031604	149.173	3.45137	0.603105	5.72267	1.05e-08	3.49e-07
LOC110031658	277.402	2.03666	0.462414	4.4044	1.06e-05	0.000193487
LOC110031667	110.271	2.44077	0.597225	4.08685	4.37e-05	0.000681542
LOC110031700	452.256	2.35043	0.435264	5.40002	6.66e-08	1.94e-06
LOC110031703	1448.65	1.64512	0.452454	3.636	0.000276909	0.00342743
LOC110031740	249.937	2.26436	0.498488	4.54246	5.56e-06	0.000107725
LOC110031789	368.764	2.08021	0.460418	4.51809	6.24e-06	0.000119622
LOC110031804	46.1399	1.99194	0.497216	4.00619	6.17e-05	0.000924302
LOC110031840	142.874	3.64081	0.891127	4.08562	4.4e-05	0.000684162
LOC110031852	794.31	2.63132	0.42474	6.19511	5.82e-10	2.31e-08
LOC110031873	426.144	3.92363	0.295934	13.2585	4.03e-40	2.54e-37
LOC110031903	40.6411	2.50431	0.731494	3.42355	0.000618086	0.00666138
LOC110032003	287.227	5.0401	0.586606	8.59197	8.55e-18	8.35e-16
LOC110032026	132.549	2.56703	0.659886	3.89011	0.0001002	0.00143519
LOC110032088	68.5355	2.29722	0.627232	3.66248	0.000249785	0.00313339
LOC110032089	76.5133	2.13744	0.628185	3.40256	0.000667574	0.00707821
LOC110032131	510.342	3.00737	0.791766	3.79831	0.000145688	0.00198998
LOC110032134	925.136	4.07776	0.490563	8.31241	9.38e-17	8.33e-15
LOC110032150	122.076	2.7436	0.660541	4.15356	3.27e-05	0.000528856
LOC110032178	19.494	5.81885	1.24424	4.67665	2.92e-06	5.96e-05
LOC110032249	57.8612	2.61536	0.676654	3.86513	0.00011103	0.00157122
LOC110032250	20.636	4.0543	1.2191	3.32566	0.000882101	0.00880358
LOC110032257	136.377	3.13198	0.557576	5.61714	1.94e-08	6.08e-07
LOC110032261	406.533	2.13409	0.250946	8.50415	1.83e-17	1.74e-15
LOC110032301	7267.78	1.67221	0.435119	3.84311	0.000121485	0.00169743
LOC110032336	821.005	1.95062	0.278036	7.01573	2.29e-12	1.28e-10
LOC110032345	47.802	3.42214	0.65295	5.24105	1.6e-07	4.34e-06
LOC110032374	88.6612	4.39818	0.578274	7.6057	2.83e-14	1.98e-12
LOC110032377	103.262	1.92626	0.475117	4.05429	5.03e-05	0.000770885
LOC110032486	918.594	2.82717	0.368631	7.66937	1.73e-14	1.24e-12
LOC110032493	2045.55	2.46036	0.219223	11.2231	3.14e-29	8.29e-27
LOC110032551	243.038	2.88649	0.548956	5.25814	1.46e-07	4e-06
LOC110032614	111.583	2.13103	0.609124	3.49852	0.000467847	0.00530417
LOC110032711	105.83	1.58211	0.442183	3.57796	0.000346284	0.00414392
LOC110032714	62.6672	4.76911	0.712062	6.6976	2.12e-11	1.01e-09
LOC110032898	337.405	2.71839	0.531162	5.11781	3.09e-07	7.96e-06
LOC110032997	44.0058	4.36119	0.683448	6.38117	1.76e-10	7.41e-09
LOC110033004	34.9697	2.2583	0.618003	3.65419	0.000257999	0.00321816
LOC110033039	30.5106	4.27277	1.21053	3.52965	0.000416104	0.00484495
LOC110033051	1233.79	2.03752	0.315573	6.45657	1.07e-10	4.67e-09
LOC110033061	338.88	1.77636	0.529737	3.35328	0.000798595	0.00814963
LOC110033064	1861.61	3.44112	0.499531	6.8887	5.63e-12	2.97e-10
LOC110033113	59.4863	4.06006	0.535798	7.57761	3.52e-14	2.45e-12
LOC110033133	107.006	5.19458	0.803434	6.46547	1.01e-10	4.44e-09
LOC110033135	79.7857	1.57436	0.358983	4.3856	1.16e-05	0.000210114
LOC110033145	2410.3	2.94174	0.321105	9.1613	5.13e-20	6.43e-18
LOC110033152	2073.85	5.12016	0.482465	10.6125	2.61e-26	5.55e-24
LOC110033170	91.8956	1.9921	0.591744	3.36649	0.000761313	0.00785993
LOC110033175	125.687	3.21095	0.402503	7.97746	1.49e-15	1.19e-13
LOC110033187	247.525	1.61691	0.425563	3.79946	0.000145013	0.00198358
LOC110033223	2018.59	1.74756	0.257948	6.77486	1.25e-11	6.23e-10
LOC110033278	1750.71	3.98786	0.441785	9.0267	1.77e-19	2.03e-17
LOC110033294	1948.31	4.64317	0.481033	9.65251	4.8e-22	7.25e-20
LOC110033307	75.6526	1.58403	0.477749	3.31561	0.000914427	0.00908005
LOC110033315	79.4666	3.49069	0.986514	3.53841	0.000402548	0.00471457
LOC110033322	285.923	4.32173	0.476186	9.07571	1.13e-19	1.35e-17
LOC110033354	33.4347	4.09683	0.79611	5.14605	2.66e-07	6.96e-06
LOC110033451	8153.47	6.09738	0.335437	18.1774	7.79e-74	6.89e-70
LOC110033479	1476.26	1.82923	0.440979	4.14812	3.35e-05	0.0005402
LOC110033494	1970.36	4.08046	0.532953	7.65633	1.91e-14	1.36e-12
LOC110033505	109.965	2.6027	0.385646	6.74895	1.49e-11	7.33e-10
LOC110033510	1478.53	2.12598	0.452145	4.70198	2.58e-06	5.31e-05
LOC110033525	234.965	4.42934	0.446766	9.91424	3.61e-23	6.08e-21
LOC110033527	1110.74	5.10207	0.560473	9.10315	8.78e-20	1.08e-17
LOC110033530	319.208	4.74821	0.509535	9.3187	1.18e-20	1.59e-18
LOC110033532	448.048	4.13363	0.644327	6.41542	1.4e-10	6.01e-09
LOC110033564	765.181	1.82551	0.323601	5.64125	1.69e-08	5.38e-07
LOC110033620	344.021	2.23643	0.34988	6.39199	1.64e-10	6.94e-09
LOC110033647	544.534	3.53064	0.502097	7.03178	2.04e-12	1.16e-10
LOC110033706	14.4788	3.11084	0.80009	3.88812	0.000101025	0.00144584
LOC110033776	65.0375	2.70733	0.719993	3.76022	0.000169762	0.00225436
LOC110033792	1315.04	3.17042	0.468661	6.76484	1.33e-11	6.64e-10
LOC110033830	131.14	3.28599	0.552322	5.94941	2.69e-09	9.79e-08
LOC110033873	2315.16	1.73788	0.372082	4.67068	3e-06	6.11e-05
LOC110033880	71.3683	1.65943	0.430399	3.85555	0.000115468	0.00162621
LOC110033897	82.0235	1.94732	0.401397	4.85137	1.23e-06	2.71e-05
LOC110033898	328.649	3.78414	0.651006	5.81276	6.15e-09	2.12e-07
LOC110033924	1552.69	4.63739	0.522363	8.8777	6.83e-19	7.22e-17
LOC110033980	264.03	2.41071	0.295341	8.16245	3.28e-16	2.75e-14
LOC110033992	44.6805	4.51987	0.89504	5.04991	4.42e-07	1.09e-05
LOC110033994	257.17	1.95472	0.381776	5.12008	3.05e-07	7.88e-06
LOC110034009	200.154	3.04262	0.301506	10.0914	6.03e-24	1.04e-21
LOC110034016	130.456	2.66154	0.712856	3.73363	0.000188736	0.0024583
LOC110034022	97.2261	3.25014	0.497672	6.53069	6.55e-11	2.96e-09
LOC110034149	28.0301	3.78578	0.972741	3.89187	9.95e-05	0.00142711
LOC110034221	156.57	2.08575	0.397523	5.24686	1.55e-07	4.21e-06
LOC110034223	44.0121	6.00286	0.893435	6.71885	1.83e-11	8.89e-10
LOC110034297	75.6575	1.63191	0.468038	3.48671	0.000489005	0.00549885
LOC110034304	540.227	2.28282	0.476735	4.78844	1.68e-06	3.62e-05
LOC110034336	4.96166	5.73837	1.68658	3.40237	0.000668045	0.00707896
LOC110034365	64.3002	2.2711	0.625164	3.63281	0.000280346	0.00346512
LOC110034390	382.723	1.58488	0.331961	4.77431	1.8e-06	3.86e-05
LOC110034427	8889.76	2.72892	0.50255	5.43014	5.63e-08	1.66e-06
LOC110034444	472.443	2.01936	0.275158	7.3389	2.15e-13	1.35e-11
LOC110034469	91.8405	1.57902	0.475502	3.32074	0.000897807	0.00893008
LOC110034485	1374.59	1.57594	0.371852	4.23808	2.25e-05	0.000382031
LOC110034497	685.483	4.70191	0.382281	12.2996	9.1e-35	3.42e-32
LOC110034502	148.29	3.1408	0.69415	4.52466	6.05e-06	0.000116344
LOC110034547	164.639	1.7448	0.419062	4.16359	3.13e-05	0.0005094
LOC110034648	204.731	3.05046	0.433648	7.03441	2e-12	1.14e-10
LOC110034683	267.239	2.89098	0.348885	8.28633	1.17e-16	1.03e-14
LOC110034686	184.999	2.4275	0.424936	5.71262	1.11e-08	3.68e-07
LOC110034700	948.783	1.85856	0.49393	3.7628	0.000168019	0.00223624
LOC110034714	149.223	2.30856	0.516609	4.46869	7.87e-06	0.000147616
LOC110034832	1212.17	1.61368	0.267491	6.03264	1.61e-09	6e-08
LOC110035093	37.7778	2.39546	0.502006	4.77177	1.83e-06	3.89e-05
LOC110035149	1161.48	1.87314	0.48058	3.89766	9.71e-05	0.00139572
LOC110035162	148.053	4.21227	0.544078	7.74203	9.78e-15	7.21e-13
LOC110035166	105.135	2.24179	0.371269	6.03818	1.56e-09	5.81e-08
LOC110035188	137.807	3.35782	0.473828	7.08659	1.37e-12	8.1e-11
LOC110035214	98.4371	3.71569	0.481631	7.7148	1.21e-14	8.81e-13
LOC110035226	106.844	6.71288	0.964771	6.958	3.45e-12	1.87e-10
LOC110035233	1383.54	4.22883	0.680559	6.21375	5.17e-10	2.06e-08
LOC110035248	40.6715	1.50001	0.436713	3.43476	0.000593071	0.0064389
LOC110035315	192.872	2.22336	0.520315	4.27311	1.93e-05	0.000329506
LOC110035357	228.362	3.72773	0.370541	10.0602	8.28e-24	1.41e-21
LOC110035358	57.1867	1.71349	0.508674	3.36854	0.000755669	0.00781079
LOC110035439	87.162	1.59392	0.390618	4.08051	4.49e-05	0.000695505
LOC110035441	195.576	3.95323	0.374189	10.5648	4.34e-26	8.92e-24
LOC110035450	73.164	3.39934	0.668649	5.08389	3.7e-07	9.34e-06
LOC110035454	89.9129	1.5767	0.385967	4.08507	4.41e-05	0.000684954
LOC110035489	118.605	2.51278	0.598585	4.19787	2.69e-05	0.000447167
LOC110035537	1453.85	2.05051	0.431322	4.75401	1.99e-06	4.2e-05
LOC110035565	263.09	2.2206	0.361858	6.13668	8.43e-10	3.25e-08
LOC110035598	500.165	3.13144	0.394843	7.93085	2.18e-15	1.71e-13
LOC110035707	275.172	1.56643	0.442125	3.54296	0.00039566	0.00464671
LOC110035730	461.899	1.75117	0.284754	6.14978	7.76e-10	3.01e-08
LOC110035746	1526.37	1.7082	0.437767	3.90208	9.54e-05	0.00137719
LOC110035777	681.812	1.83355	0.341964	5.36181	8.24e-08	2.38e-06
LOC110035782	318.095	2.13981	0.258529	8.27687	1.26e-16	1.1e-14
LOC110035794	72.988	3.60078	0.995057	3.61866	0.000296128	0.00362972
LOC110035897	354.613	1.84323	0.293719	6.27551	3.48e-10	1.43e-08
LOC110035924	369.543	4.57294	0.800751	5.71082	1.12e-08	3.71e-07
LOC110035946	1980.22	3.06154	0.412766	7.41714	1.2e-13	7.86e-12
LOC110035968	76.5943	1.66735	0.436435	3.82039	0.000133239	0.00184129
LOC110036024	355.654	5.73008	0.444958	12.8778	6e-38	3.03e-35
LOC110036052	4965.44	2.19538	0.218175	10.0625	8.09e-24	1.39e-21
LOC110036085	919.985	2.65873	0.246799	10.7728	4.63e-27	1.03e-24
LOC110036101	247.038	1.85903	0.388278	4.7879	1.69e-06	3.62e-05
LOC110036104	62.1727	1.61228	0.421951	3.82102	0.0001329	0.00183804
LOC110036147	249.779	1.90516	0.525227	3.62731	0.000286394	0.00352507
LOC110036156	30.3593	2.84892	0.573076	4.97128	6.65e-07	1.57e-05
LOC110036163	1434.5	1.68361	0.220496	7.63554	2.25e-14	1.58e-12
LOC110036167	19.8469	3.77231	0.758957	4.97039	6.68e-07	1.57e-05
LOC110036336	137.651	4.67655	0.827528	5.65123	1.59e-08	5.1e-07
LOC110036344	42.6935	1.84938	0.51192	3.61263	0.000303109	0.0036999
LOC110036346	297.221	3.93595	0.485668	8.1042	5.31e-16	4.36e-14
LOC110036362	18.5651	4.69839	1.37808	3.40938	0.000651117	0.006937
LOC110036409	195.03	1.76243	0.427592	4.12176	3.76e-05	0.000595481
LOC110036445	484.619	2.00532	0.507253	3.95329	7.71e-05	0.00113254
LOC110036559	157.407	2.61156	0.389699	6.70148	2.06e-11	9.94e-10
LOC110036562	41.6207	2.31174	0.687474	3.36266	0.000771967	0.00792825
LOC110036591	265.01	1.84465	0.542466	3.40049	0.000672661	0.00709034
LOC110036629	390.59	4.35749	0.630212	6.91433	4.7e-12	2.51e-10
LOC110036640	127.331	2.05186	0.411857	4.98197	6.29e-07	1.49e-05
LOC110036650	153.731	3.04878	0.441682	6.90267	5.1e-12	2.7e-10
LOC110036736	64.7308	1.79103	0.376084	4.76231	1.91e-06	4.07e-05
LOC110036869	193.838	1.51947	0.443491	3.42615	0.000612204	0.00661412
LOC110036891	43.3341	4.34689	0.763718	5.69175	1.26e-08	4.12e-07
LOC110036919	365.985	1.80532	0.355068	5.08444	3.69e-07	9.32e-06
LOC110036924	30.8608	3.87503	0.96019	4.03569	5.44e-05	0.000825264
LOC110036929	53.9678	2.07595	0.618742	3.35512	0.000793304	0.00810969
LOC110036944	400.865	1.65074	0.406606	4.0598	4.91e-05	0.000754885
LOC110037021	7.87341	5.41242	1.4798	3.65753	0.000254656	0.00318771
LOC110037031	160.244	2.67533	0.391562	6.83247	8.35e-12	4.3e-10
LOC110037034	845.705	3.81745	0.227376	16.7892	2.93e-63	7.4e-60
LOC110037072	1445.18	3.15537	0.466194	6.76836	1.3e-11	6.5e-10
LOC110037122	978.036	4.26966	0.504533	8.46259	2.62e-17	2.45e-15
LOC110037192	59.2092	1.72015	0.523017	3.28889	0.00100582	0.0098275
LOC110037214	152.604	6.34294	0.762165	8.32227	8.63e-17	7.7e-15
LOC110037224	307.9	2.86457	0.506809	5.65217	1.58e-08	5.08e-07
LOC110037241	85.4835	2.28908	0.573783	3.98945	6.62e-05	0.000986151
LOC110037254	34.047	3.41955	0.853346	4.00723	6.14e-05	0.000921012
LOC110037255	603.654	2.1298	0.209058	10.1876	2.25e-24	4.15e-22
LOC110037265	145.774	2.50686	0.441608	5.67665	1.37e-08	4.45e-07
LOC110037300	344.053	3.80728	0.568783	6.69372	2.18e-11	1.03e-09
LOC110037395	776.218	3.43215	0.525541	6.5307	6.55e-11	2.96e-09
LOC110037414	1084.43	1.9922	0.255827	7.78729	6.85e-15	5.15e-13
LOC110037441	212.753	1.67168	0.364041	4.59202	4.39e-06	8.71e-05
LOC110037454	52.5624	1.50315	0.404107	3.71969	0.000199467	0.00257907
LOC110037472	220.245	4.29109	0.623014	6.88763	5.67e-12	2.98e-10
LOC110037490	84.3532	3.2091	0.899031	3.56951	0.000357654	0.00425693
LOC110037492	282.369	3.32024	0.284585	11.667	1.88e-31	5.63e-29
LOC110037518	295.774	2.25242	0.300651	7.4918	6.79e-14	4.65e-12
LOC110037557	16.2507	6.48076	1.5447	4.19549	2.72e-05	0.000450613
LOC110037564	21.3333	3.51909	1.05278	3.34268	0.000829747	0.00837566
LOC110037575	327.941	2.41165	0.377435	6.38957	1.66e-10	7.03e-09
LOC110037581	46.7908	2.17019	0.638511	3.39883	0.000676759	0.00712431
LOC110037609	171.42	1.68505	0.321287	5.24468	1.57e-07	4.26e-06
LOC110037613	151.961	2.43092	0.497728	4.88402	1.04e-06	2.33e-05
LOC110037631	207.961	2.10013	0.462676	4.5391	5.65e-06	0.000109012
LOC110037681	102.573	2.12187	0.548228	3.87042	0.000108649	0.00154246
LOC110037738	648.262	2.91031	0.665832	4.37094	1.24e-05	0.000222672
LOC110037754	114.659	3.45549	0.656861	5.26061	1.44e-07	3.95e-06
LOC110037786	187.799	4.07818	0.376145	10.842	2.18e-27	5.06e-25
LOC110037799	398.04	2.2469	0.319326	7.0364	1.97e-12	1.13e-10
LOC110037811	699.269	3.52136	0.365006	9.64741	5.04e-22	7.55e-20
LOC110037822	855.233	2.09061	0.262882	7.95264	1.83e-15	1.44e-13
LOC110037838	93.4883	6.7773	0.906927	7.47281	7.85e-14	5.26e-12
LOC110037843	22.3141	3.07871	0.859761	3.58089	0.000342426	0.00410609
LOC110037891	69.8091	2.46624	0.693987	3.55373	0.000379812	0.00448143
LOC110037900	1839.54	2.71658	0.47092	5.76867	7.99e-09	2.72e-07
LOC110037916	21.7225	4.12699	0.870725	4.73972	2.14e-06	4.48e-05
LOC110037982	63.5508	2.09416	0.463258	4.52051	6.17e-06	0.00011839
LOC110038062	42.8185	1.93234	0.478609	4.0374	5.4e-05	0.00082067
LOC110038090	95.0973	1.868	0.399829	4.67198	2.98e-06	6.08e-05
LOC110038098	1133.95	4.23566	0.389144	10.8846	1.37e-27	3.22e-25
LOC110038103	92.5905	3.21291	0.420863	7.63409	2.27e-14	1.6e-12
LOC110038145	92.5798	4.63122	0.771991	5.99905	1.98e-09	7.31e-08
LOC110038174	102.255	1.66601	0.442704	3.76326	0.000167712	0.00223384
LOC110038213	13.5115	4.26489	1.03585	4.11728	3.83e-05	0.000605538
LOC110038259	254.623	4.13816	0.631481	6.5531	5.64e-11	2.57e-09
LOC110038276	95.9915	2.18816	0.411206	5.32132	1.03e-07	2.91e-06
LOC110038290	76.0155	2.60712	0.702357	3.71196	0.000205663	0.00264756
LOC110038404	60.922	2.1217	0.590305	3.59425	0.000325325	0.00392965
LOC110038435	87.0434	6.39718	0.908798	7.03916	1.93e-12	1.11e-10
LOC110038456	102.79	1.7348	0.466251	3.72074	0.000198642	0.00257042
LOC110038489	85.9172	5.23641	0.933109	5.61179	2e-08	6.24e-07
LOC110038521	105.056	4.41813	0.797806	5.53785	3.06e-08	9.3e-07
LOC110038561	98.2146	1.92733	0.414131	4.65391	3.26e-06	6.61e-05
LOC110038695	56.4501	1.85709	0.504158	3.68354	0.000230016	0.00292274
LOC110038701	85.2561	4.52461	0.616023	7.34488	2.06e-13	1.3e-11
LOC110038757	130.907	2.52847	0.722714	3.49857	0.000467756	0.00530417
LOC110038787	233.569	1.57425	0.342982	4.58988	4.44e-06	8.79e-05
LOC110038821	8.91583	6.5848	1.54495	4.26215	2.02e-05	0.000345763
LOC110038836	27.0642	4.68333	0.993309	4.71488	2.42e-06	5.01e-05
LOC110038911	354.45	2.51679	0.611694	4.11446	3.88e-05	0.000612459
LOC110039058	124.689	1.53704	0.419669	3.66251	0.000249754	0.00313339
LOC110039109	30.0931	2.5782	0.743832	3.4661	0.000528062	0.00585907
LOC110039111	80.1447	2.39327	0.456089	5.24737	1.54e-07	4.21e-06
LOC110039157	2281.9	4.42419	0.488526	9.0562	1.35e-19	1.58e-17
LOC110039188	218.095	2.40752	0.344446	6.98954	2.76e-12	1.52e-10
LOC110039248	225.889	7.57882	0.610904	12.4059	2.43e-35	1.05e-32
LOC110039250	14.4814	7.28259	1.80238	4.04055	5.33e-05	0.000811145
LOC110039286	86.0351	4.6962	1.02029	4.60282	4.17e-06	8.31e-05
LOC110039299	157.055	1.77818	0.381012	4.66699	3.06e-06	6.22e-05
LOC110039392	41.4446	1.62357	0.455536	3.56408	0.000365128	0.0043313
LOC110039534	29.5153	2.52254	0.687277	3.67034	0.00024223	0.00305131
LOC110039565	21.7616	2.60528	0.776312	3.35597	0.000790863	0.00808941
LOC110038457	1605.65	-4.49409	0.255121	-17.6155	1.87e-69	1.1e-65
LOC110024427	6951.97	-4.96693	0.285222	-17.4143	6.43e-68	2.84e-64
LOC110034667	634.44	-4.8763	0.287216	-16.9778	1.2e-64	3.53e-61
LOC110027018	461.914	-4.41484	0.27238	-16.2084	4.4e-59	7.78e-56
LOC110018250	4134.65	-7.72623	0.482265	-16.0207	9.16e-58	1.47e-54
LOC110030958	1746.09	-4.58674	0.291879	-15.7145	1.2e-55	1.77e-52
LOC110026386	4038.74	-6.58928	0.420231	-15.6801	2.07e-55	2.81e-52
LOC110025280	3817.57	-5.25604	0.361574	-14.5366	7.11e-48	6.98e-45
LOC110036228	501.9	-3.14378	0.219665	-14.3117	1.85e-46	1.72e-43
LOC110031103	569.195	-7.6402	0.534275	-14.3001	2.18e-46	1.93e-43
LOC110023052	6289.59	-3.50156	0.249907	-14.0115	1.33e-44	1.07e-41
LOC110031047	5078.98	-4.6723	0.337483	-13.8445	1.37e-43	1.05e-40
LOC110017959	600.29	-4.5203	0.346528	-13.0445	6.83e-39	4.02e-36
LOC110026633	502.73	-8.43897	0.647328	-13.0366	7.58e-39	4.32e-36
LOC110023588	251.894	-4.68182	0.36079	-12.9766	1.66e-38	9.04e-36
LOC110026020	316.842	-5.88259	0.453367	-12.9753	1.69e-38	9.04e-36
LOC110025018	1255.64	-3.73405	0.289768	-12.8863	5.37e-38	2.79e-35
LOC110020230	552.574	-3.39002	0.264447	-12.8193	1.28e-37	6.28e-35
LOC110038597	1616.16	-6.19751	0.48679	-12.7314	3.96e-37	1.84e-34
LOC110020209	1065.78	-2.29032	0.181264	-12.6353	1.35e-36	6.11e-34
LOC110035712	2632.99	-3.14789	0.250444	-12.5693	3.12e-36	1.38e-33
LOC110033126	3397.17	-5.19206	0.418589	-12.4037	2.49e-35	1.05e-32
LOC110024383	411.77	-6.11247	0.493069	-12.3968	2.72e-35	1.12e-32
LOC110027071	212.509	-4.53848	0.367103	-12.363	4.15e-35	1.63e-32
LOC110023491	2444.22	-2.34559	0.194782	-12.0421	2.13e-33	7.7e-31
LOC110036135	178.338	-5.51482	0.464717	-11.8671	1.76e-32	5.85e-30
LOC110026661	3572.63	-5.8022	0.494012	-11.7451	7.49e-32	2.36e-29
LOC110029425	3673.13	-3.09946	0.263993	-11.7407	7.88e-32	2.4e-29
LOC110025071	20100.4	-3.73781	0.322055	-11.6061	3.84e-31	1.13e-28
LOC110023679	6910.47	-2.9902	0.258998	-11.5452	7.8e-31	2.26e-28
LOC110038163	721.578	-3.47947	0.304168	-11.4393	2.66e-30	7.23e-28
LOC110024270	13913.1	-5.80553	0.515443	-11.2632	1.99e-29	5.34e-27
LOC110033028	556.995	-2.54862	0.229963	-11.0827	1.52e-28	3.84e-26
LOC110032855	322.062	-2.53998	0.229347	-11.0749	1.66e-28	4.14e-26
LOC110030536	2078.17	-3.90292	0.355732	-10.9715	5.24e-28	1.25e-25
LOC110035006	3724.31	-6.77414	0.628567	-10.7771	4.41e-27	1.01e-24
LOC110035464	491.203	-4.12296	0.382643	-10.7749	4.52e-27	1.02e-24
LOC110021075	17200.7	-3.64155	0.341096	-10.676	1.32e-26	2.91e-24
LOC110021779	17073.5	-2.41264	0.227783	-10.5918	3.25e-26	6.84e-24
LOC110019967	584.724	-2.72046	0.257335	-10.5717	4.03e-26	8.38e-24
LOC110023446	217.198	-4.30889	0.410071	-10.5077	7.96e-26	1.62e-23
LOC110036215	764.057	-6.85548	0.658573	-10.4096	2.24e-25	4.45e-23
LOC110024802	1657.76	-2.1165	0.208168	-10.1673	2.78e-24	4.96e-22
LOC110038982	481.885	-2.58693	0.255695	-10.1173	4.63e-24	8.19e-22
LOC110022095	1896.68	-2.36049	0.233492	-10.1095	5.01e-24	8.77e-22
LOC110031313	4530.32	-10.8639	1.10053	-9.87151	5.53e-23	9.23e-21
LOC110029844	258.411	-2.40678	0.244683	-9.83631	7.85e-23	1.3e-20
LOC110025286	546.498	-2.30587	0.235079	-9.80894	1.03e-22	1.69e-20
LOC110038819	361.148	-7.77183	0.796246	-9.7606	1.66e-22	2.67e-20
LOC110031670	2202.53	-6.25369	0.640762	-9.75977	1.68e-22	2.67e-20
LOC110027026	10901	-5.71381	0.585833	-9.7533	1.79e-22	2.82e-20
LOC110023927	935.232	-2.26073	0.232647	-9.71745	2.54e-22	3.97e-20
LOC110029978	169.986	-3.66881	0.378505	-9.6929	3.23e-22	5.01e-20
LOC110029517	265.712	-3.24638	0.335456	-9.67753	3.76e-22	5.77e-20
LOC110031460	1988.16	-2.75776	0.286027	-9.64159	5.34e-22	7.92e-20
LOC110037394	1384.97	-6.14373	0.641617	-9.57539	1.01e-21	1.47e-19
LOC110039146	687.434	-2.51668	0.262906	-9.57254	1.04e-21	1.49e-19
LOC110020107	3080.38	-1.97689	0.207728	-9.51674	1.79e-21	2.53e-19
LOC110024026	4282.51	-4.18851	0.446986	-9.37058	7.21e-21	9.81e-19
LOC110033053	1357.27	-5.74886	0.621286	-9.25316	2.18e-20	2.85e-18
LOC110025748	3763.8	-1.66506	0.180479	-9.2258	2.81e-20	3.6e-18
LOC110021441	3473.94	-5.53506	0.600611	-9.21572	3.09e-20	3.93e-18
LOC110035324	240.624	-2.18117	0.237864	-9.16981	4.74e-20	5.98e-18
LOC110017954	377.516	-3.62376	0.396229	-9.14564	5.93e-20	7.38e-18
LOC110030484	1966.9	-2.23995	0.24603	-9.10436	8.68e-20	1.07e-17
LOC110031377	889.195	-3.43626	0.377772	-9.09611	9.36e-20	1.14e-17
LOC110031718	1915.71	-4.66306	0.513009	-9.08962	9.94e-20	1.2e-17
LOC110031646	372.029	-2.04047	0.224635	-9.08349	1.05e-19	1.26e-17
LOC110033421	1183.43	-4.6299	0.510379	-9.07149	1.17e-19	1.38e-17
LOC110026214	245.296	-8.97954	0.995617	-9.01907	1.9e-19	2.16e-17
LOC110024653	533.065	-5.57965	0.621457	-8.97833	2.75e-19	3.09e-17
LOC110036904	667.575	-1.68419	0.187806	-8.9677	3.03e-19	3.39e-17
LOC110033864	271.809	-3.06854	0.343163	-8.94193	3.82e-19	4.25e-17
LOC110035286	256.532	-3.2976	0.36884	-8.94047	3.88e-19	4.28e-17
LOC110025380	789.405	-3.03992	0.341333	-8.90601	5.29e-19	5.77e-17
LOC110023855	533.569	-2.11951	0.23834	-8.89282	5.96e-19	6.46e-17
LOC110018360	1579.36	-1.97176	0.221854	-8.88763	6.24e-19	6.69e-17
LOC110027045	498.503	-2.7677	0.311414	-8.88751	6.25e-19	6.69e-17
LOC110026632	83.4861	-6.68469	0.752311	-8.88554	6.36e-19	6.77e-17
LOC110030591	301.783	-2.54081	0.288241	-8.81486	1.2e-18	1.25e-16
LOC110023595	79.27	-6.35078	0.724465	-8.76616	1.85e-18	1.9e-16
LOC110022336	4184.28	-3.71091	0.427131	-8.68799	3.69e-18	3.73e-16
LOC110022349	6198.58	-2.95503	0.341672	-8.64875	5.21e-18	5.2e-16
LOC110026636	1844.98	-12.4602	1.44304	-8.63471	5.89e-18	5.81e-16
LOC110031349	1779.45	-11.8826	1.37707	-8.62892	6.19e-18	6.08e-16
LOC110021308	714.141	-3.36348	0.39153	-8.59062	8.65e-18	8.4e-16
LOC110028360	690.43	-2.46459	0.28983	-8.50357	1.84e-17	1.74e-15
LOC110022335	6517.79	-3.91065	0.463964	-8.42877	3.49e-17	3.23e-15
LOC110023778	72.0014	-3.45869	0.411223	-8.41075	4.07e-17	3.73e-15
LOC110032666	136.999	-2.82545	0.336389	-8.39934	4.49e-17	4.09e-15
LOC110025950	864.674	-2.49987	0.297843	-8.39323	4.73e-17	4.29e-15
LOC110023027	2271.76	-5.17485	0.625847	-8.26854	1.36e-16	1.17e-14
LOC110027680	15269.7	-2.42675	0.293782	-8.26037	1.45e-16	1.25e-14
LOC110037226	736.756	-2.14033	0.259238	-8.25623	1.5e-16	1.28e-14
LOC110025700	569.328	-5.74634	0.697982	-8.23279	1.83e-16	1.55e-14
LOC110025435	1908.66	-2.04687	0.25234	-8.11156	5e-16	4.13e-14
LOC110035796	2705.03	-3.61947	0.447418	-8.08969	5.98e-16	4.89e-14
LOC110027888	2281.85	-3.81153	0.471744	-8.07966	6.49e-16	5.29e-14
LOC110033070	656.085	-5.63489	0.707056	-7.96951	1.59e-15	1.27e-13
LOC110025697	3225.45	-5.52048	0.697192	-7.91817	2.41e-15	1.89e-13
LOC110035036	582.817	-5.41342	0.686786	-7.88225	3.22e-15	2.49e-13
LOC110031874	1372.75	-2.71088	0.344654	-7.86554	3.68e-15	2.82e-13
LOC110028244	734.568	-2.56752	0.326839	-7.85562	3.98e-15	3.04e-13
LOC110035673	203.793	-2.95751	0.378647	-7.81072	5.69e-15	4.31e-13
LOC110023768	587.539	-2.34917	0.302216	-7.77316	7.65e-15	5.73e-13
LOC110026604	1037.75	-4.31652	0.556644	-7.75454	8.87e-15	6.61e-13
LOC110031367	1708.4	-12.3468	1.59298	-7.75074	9.14e-15	6.78e-13
LOC110023051	75.1931	-6.49614	0.838338	-7.74883	9.27e-15	6.86e-13
LOC110033863	62.3957	-3.09921	0.400512	-7.73812	1.01e-14	7.37e-13
LOC110027541	192.604	-2.04923	0.271919	-7.53617	4.84e-14	3.34e-12
LOC110026235	105.386	-3.36264	0.448969	-7.48969	6.9e-14	4.7e-12
LOC110025197	197.092	-2.68971	0.359128	-7.48955	6.91e-14	4.7e-12
LOC110030179	1953.14	-3.06426	0.409657	-7.48006	7.43e-14	5e-12
LOC110038777	137.638	-7.66929	1.02533	-7.47982	7.44e-14	5e-12
LOC110030037	85.8193	-2.88171	0.386799	-7.45016	9.32e-14	6.19e-12
LOC110034677	99.3652	-6.27497	0.84282	-7.44521	9.68e-14	6.41e-12
LOC110021573	1036.3	-1.63593	0.220157	-7.43075	1.08e-13	7.12e-12
LOC110033120	927.93	-1.92988	0.260789	-7.40018	1.36e-13	8.84e-12
LOC110037188	378.817	-4.22481	0.571844	-7.38806	1.49e-13	9.65e-12
LOC110036855	96.9717	-5.3626	0.726512	-7.38129	1.57e-13	1.01e-11
LOC110024909	278.439	-6.08958	0.825935	-7.37295	1.67e-13	1.07e-11
LOC110020662	30377.1	-1.97173	0.267587	-7.36856	1.72e-13	1.1e-11
LOC110025049	107.848	-3.22102	0.439118	-7.33521	2.21e-13	1.39e-11
LOC110036023	685.227	-1.68635	0.229997	-7.33205	2.27e-13	1.42e-11
LOC110030162	722.36	-1.77359	0.243682	-7.2783	3.38e-13	2.08e-11
LOC110018631	506.067	-1.74097	0.239672	-7.26397	3.76e-13	2.31e-11
LOC110027892	10278.2	-2.52311	0.348956	-7.23044	4.81e-13	2.93e-11
LOC110034370	169.677	-2.42234	0.335414	-7.22195	5.12e-13	3.11e-11
LOC110018723	175.38	-9.96445	1.38245	-7.20783	5.69e-13	3.44e-11
LOC110026323	180.775	-2.21769	0.311346	-7.12291	1.06e-12	6.31e-11
LOC110031076	131.503	-3.3783	0.476936	-7.08335	1.41e-12	8.26e-11
LOC110028745	75.1539	-5.07802	0.717171	-7.08063	1.44e-12	8.38e-11
LOC110038424	415.4	-4.01922	0.567652	-7.08043	1.44e-12	8.38e-11
LOC110029018	252.316	-4.15787	0.589719	-7.0506	1.78e-12	1.03e-10
LOC110034845	157.46	-9.80867	1.39127	-7.05014	1.79e-12	1.03e-10
LOC110037606	43.844	-3.35474	0.476617	-7.03864	1.94e-12	1.11e-10
LOC110020193	6926.75	-2.9566	0.420612	-7.02928	2.08e-12	1.18e-10
LOC110034349	50.0857	-5.64403	0.803398	-7.0252	2.14e-12	1.2e-10
LOC110024656	171.217	-3.5314	0.503742	-7.01032	2.38e-12	1.33e-10
LOC110029705	195.722	-5.46559	0.780266	-7.00479	2.47e-12	1.37e-10
LOC110032624	489.679	-3.91764	0.559881	-6.99729	2.61e-12	1.44e-10
LOC110023592	1336.71	-3.12023	0.446694	-6.98517	2.85e-12	1.56e-10
LOC110036043	706.813	-1.75417	0.251415	-6.97717	3.01e-12	1.65e-10
LOC110018984	538.817	-1.91184	0.276797	-6.907	4.95e-12	2.64e-10
LOC110038877	2446.32	-2.32654	0.337055	-6.90257	5.11e-12	2.7e-10
LOC110018061	108.602	-3.50687	0.510184	-6.87374	6.25e-12	3.28e-10
LOC110019484	628.149	-2.30598	0.336052	-6.86199	6.79e-12	3.55e-10
LOC110039548	1181.89	-2.88111	0.421457	-6.83607	8.14e-12	4.21e-10
LOC110030756	1142.46	-2.14396	0.313984	-6.82824	8.6e-12	4.42e-10
LOC110026089	116.924	-7.15034	1.04723	-6.82785	8.62e-12	4.42e-10
LOC110019595	993.722	-3.23962	0.474717	-6.82432	8.83e-12	4.51e-10
LOC110017920	236.005	-2.06464	0.302726	-6.82017	9.09e-12	4.62e-10
LOC110032034	186.921	-2.52753	0.370821	-6.81605	9.36e-12	4.74e-10
LOC110022736	567.94	-2.5957	0.381044	-6.81207	9.62e-12	4.86e-10
LOC110020823	315.119	-2.52938	0.373133	-6.77877	1.21e-11	6.09e-10
LOC110027542	206.588	-1.82952	0.270974	-6.75163	1.46e-11	7.26e-10
LOC110037687	143.203	-2.35244	0.348544	-6.74933	1.49e-11	7.33e-10
LOC110035791	182.527	-4.19959	0.624732	-6.72223	1.79e-11	8.71e-10
LOC110018312	70.3058	-3.11388	0.463616	-6.71651	1.86e-11	9e-10
LOC110034816	4272.68	-1.50822	0.225239	-6.6961	2.14e-11	1.02e-09
LOC110017970	525.448	-2.23046	0.333555	-6.68693	2.28e-11	1.08e-09
LOC110017809	398.756	-1.73952	0.260433	-6.67933	2.4e-11	1.13e-09
LOC110019631	387.198	-3.06001	0.46082	-6.64035	3.13e-11	1.47e-09
LOC110020563	9456.37	-2.87309	0.433131	-6.63329	3.28e-11	1.53e-09
LOC110036198	642.396	-1.70528	0.257334	-6.62671	3.43e-11	1.6e-09
LOC110022358	741.406	-1.72693	0.26092	-6.61864	3.63e-11	1.68e-09
LOC110019326	39.491	-4.72001	0.719324	-6.56174	5.32e-11	2.44e-09
LOC110035505	685.724	-1.6367	0.249706	-6.55451	5.58e-11	2.56e-09
LOC110034355	38.377	-5.54999	0.847734	-6.54685	5.88e-11	2.68e-09
LOC110018596	1421.56	-1.75035	0.267985	-6.53152	6.51e-11	2.96e-09
LOC110031597	360.02	-1.67318	0.25704	-6.50941	7.54e-11	3.36e-09
LOC110018623	225.57	-2.88557	0.44365	-6.50415	7.81e-11	3.47e-09
LOC110032844	132.638	-2.28729	0.354224	-6.45718	1.07e-10	4.67e-09
LOC110035507	3528.65	-3.89826	0.60378	-6.45642	1.07e-10	4.67e-09
LOC110027974	5199.91	-3.90347	0.605801	-6.44348	1.17e-10	5.06e-09
LOC110018947	287.221	-3.15918	0.491207	-6.43146	1.26e-10	5.46e-09
LOC110032115	178.205	-3.02441	0.470344	-6.43021	1.27e-10	5.49e-09
LOC110023015	331.339	-1.5606	0.243706	-6.40364	1.52e-10	6.48e-09
LOC110027014	138.837	-5.47937	0.85716	-6.39247	1.63e-10	6.94e-09
LOC110024447	1135.91	-1.5148	0.237521	-6.37754	1.8e-10	7.57e-09
LOC110018804	77.9554	-6.10079	0.956838	-6.37598	1.82e-10	7.63e-09
LOC110034553	4112.45	-2.47852	0.389113	-6.36967	1.89e-10	7.93e-09
LOC110028455	50.11	-4.84255	0.76473	-6.33237	2.41e-10	9.95e-09
LOC110030623	157.18	-2.04015	0.324178	-6.29331	3.11e-10	1.28e-08
LOC110032533	505.211	-1.87648	0.299288	-6.26983	3.61e-10	1.47e-08
LOC110024060	38.9442	-8.75719	1.39914	-6.25898	3.88e-10	1.57e-08
LOC110033457	769.525	-1.71748	0.274708	-6.252	4.05e-10	1.63e-08
LOC110034396	271.359	-2.72422	0.436435	-6.24198	4.32e-10	1.73e-08
LOC110024202	4800.24	-2.22238	0.356791	-6.22881	4.7e-10	1.88e-08
LOC110030686	84.96	-3.57196	0.575993	-6.20139	5.6e-10	2.22e-08
LOC110025930	11309.4	-2.84891	0.460549	-6.1859	6.17e-10	2.44e-08
LOC110020356	215.677	-3.96117	0.640718	-6.18239	6.31e-10	2.48e-08
LOC110032590	722.403	-1.70694	0.276905	-6.16437	7.08e-10	2.77e-08
LOC110035196	73.6436	-2.75432	0.447415	-6.15608	7.46e-10	2.9e-08
LOC110032461	1467.47	-2.11375	0.343397	-6.1554	7.49e-10	2.91e-08
LOC110037280	116.184	-2.20697	0.359053	-6.14663	7.91e-10	3.06e-08
LOC110031003	386.991	-2.94083	0.481464	-6.1081	1.01e-09	3.87e-08
LOC110038884	1916.76	-2.53264	0.418584	-6.05048	1.44e-09	5.42e-08
LOC110019989	5788.08	-2.01549	0.333225	-6.04843	1.46e-09	5.48e-08
LOC110025866	357.221	-1.98283	0.32876	-6.03125	1.63e-09	6.04e-08
LOC110036184	3070.02	-1.79639	0.298749	-6.01303	1.82e-09	6.75e-08
LOC110039414	4513.87	-2.62689	0.437542	-6.00374	1.93e-09	7.13e-08
LOC110022960	671.469	-3.92472	0.653811	-6.00285	1.94e-09	7.15e-08
LOC110034475	452.439	-10.4273	1.74171	-5.98681	2.14e-09	7.86e-08
LOC110034609	330.085	-2.70443	0.454424	-5.95135	2.66e-09	9.69e-08
LOC110039462	7957.73	-1.59825	0.269092	-5.9394	2.86e-09	1.04e-07
LOC110036008	44.7484	-5.00351	0.84719	-5.90601	3.5e-09	1.25e-07
LOC110024354	682.745	-2.28063	0.388283	-5.87363	4.26e-09	1.51e-07
LOC110039478	99.6667	-4.59695	0.78443	-5.86025	4.62e-09	1.63e-07
LOC110035795	1662.13	-10.7132	1.82964	-5.85533	4.76e-09	1.67e-07
LOC110026839	1689.59	-1.56226	0.267223	-5.84628	5.03e-09	1.76e-07
LOC110035275	326.578	-1.55298	0.266019	-5.83786	5.29e-09	1.85e-07
LOC110029284	45.8807	-3.16005	0.541732	-5.83323	5.44e-09	1.89e-07
LOC110017878	171.142	-1.87279	0.321576	-5.8238	5.75e-09	1.99e-07
LOC110029155	953.394	-1.58534	0.274065	-5.78453	7.27e-09	2.5e-07
LOC110020809	502.178	-2.83544	0.490215	-5.78406	7.29e-09	2.5e-07
LOC110028262	310.018	-2.04421	0.35416	-5.77201	7.83e-09	2.68e-07
LOC110021475	96.3353	-2.67158	0.46293	-5.77103	7.88e-09	2.69e-07
LOC110026288	7948.07	-2.01179	0.349631	-5.75402	8.71e-09	2.96e-07
LOC110033240	2205.68	-3.04149	0.528633	-5.75349	8.74e-09	2.97e-07
LOC110031686	975.581	-2.54471	0.443669	-5.73561	9.72e-09	3.26e-07
LOC110024808	168.479	-3.27377	0.570862	-5.73479	9.76e-09	3.27e-07
LOC110028202	1845.19	-1.57606	0.275094	-5.72917	1.01e-08	3.37e-07
LOC110023799	713.375	-3.65956	0.639666	-5.72105	1.06e-08	3.52e-07
LOC110018541	32.9522	-4.78868	0.837607	-5.7171	1.08e-08	3.59e-07
LOC110019459	149.257	-2.73186	0.480802	-5.68188	1.33e-08	4.35e-07
LOC110025564	630.607	-2.12193	0.373747	-5.67743	1.37e-08	4.44e-07
LOC110026496	119.231	-2.42874	0.428177	-5.67228	1.41e-08	4.56e-07
LOC110032051	296.533	-4.25472	0.751709	-5.66007	1.51e-08	4.89e-07
LOC110024277	2501.45	-1.68816	0.298315	-5.65899	1.52e-08	4.9e-07
LOC110033156	577.845	-2.7623	0.488495	-5.65472	1.56e-08	5.02e-07
LOC110026894	2110.58	-2.31698	0.410636	-5.64242	1.68e-08	5.35e-07
LOC110022790	217.468	-3.26684	0.579368	-5.63862	1.71e-08	5.43e-07
LOC110024153	120.847	-2.77284	0.492112	-5.63457	1.75e-08	5.55e-07
LOC110038715	40.7751	-4.21771	0.754062	-5.59332	2.23e-08	6.87e-07
LOC110032123	230.904	-2.78894	0.499359	-5.58506	2.34e-08	7.19e-07
LOC110037950	3177.65	-2.27311	0.407074	-5.58401	2.35e-08	7.22e-07
LOC110037707	1080.79	-2.6917	0.483778	-5.56393	2.64e-08	8.07e-07
LOC110018935	32.7127	-5.27036	0.949775	-5.54906	2.87e-08	8.75e-07
LOC110031586	69.3797	-2.21453	0.399672	-5.54089	3.01e-08	9.16e-07
LOC110033260	23072.2	-2.75214	0.497612	-5.53069	3.19e-08	9.67e-07
LOC110031123	276.191	-1.56898	0.283837	-5.52774	3.24e-08	9.82e-07
LOC110035132	72.5103	-5.3183	0.968479	-5.4914	3.99e-08	1.2e-06
LOC110034087	83.2367	-3.45266	0.632392	-5.45969	4.77e-08	1.42e-06
LOC110022011	149.674	-1.84202	0.338301	-5.44491	5.18e-08	1.54e-06
LOC110025801	1351.09	-2.07599	0.381952	-5.43522	5.47e-08	1.62e-06
LOC110019467	185.52	-2.13362	0.392977	-5.42937	5.66e-08	1.67e-06
LOC110030193	478.787	-2.00899	0.372235	-5.39709	6.77e-08	1.96e-06
LOC110032457	2040.19	-2.65397	0.495019	-5.36135	8.26e-08	2.38e-06
LOC110028362	175.724	-2.68112	0.500675	-5.35501	8.56e-08	2.46e-06
LOC110034665	34.908	-4.73431	0.884706	-5.35128	8.73e-08	2.51e-06
LOC110019037	144.134	-3.03164	0.566562	-5.35095	8.75e-08	2.51e-06
LOC110022745	621.797	-2.74189	0.514826	-5.32586	1e-07	2.85e-06
LOC110018944	900.273	-1.55203	0.292261	-5.31042	1.09e-07	3.07e-06
LOC110036252	67.8543	-4.03539	0.760804	-5.30412	1.13e-07	3.17e-06
LOC110032937	69.763	-2.53168	0.47779	-5.29873	1.17e-07	3.25e-06
LOC110017804	777.002	-1.55143	0.292885	-5.29706	1.18e-07	3.27e-06
LOC110037231	29.5323	-7.38695	1.39474	-5.29629	1.18e-07	3.28e-06
LOC110026844	75.1388	-3.65955	0.69666	-5.253	1.5e-07	4.11e-06
LOC110035519	62.6001	-3.53515	0.67342	-5.24955	1.52e-07	4.17e-06
LOC110038923	1606.94	-1.97437	0.376995	-5.23713	1.63e-07	4.41e-06
LOC110018525	1216.02	-3.11152	0.595589	-5.22427	1.75e-07	4.72e-06
LOC110032769	5095.32	-1.90621	0.365807	-5.21096	1.88e-07	5.05e-06
LOC110021417	230.761	-3.34376	0.642931	-5.2008	1.98e-07	5.33e-06
LOC110033746	2947.03	-1.9482	0.374782	-5.19822	2.01e-07	5.4e-06
LOC110028965	345.492	-1.76255	0.339556	-5.19075	2.09e-07	5.6e-06
LOC110023014	941.975	-3.19045	0.616466	-5.1754	2.27e-07	6.05e-06
LOC110018528	2489.64	-3.03754	0.587132	-5.17352	2.3e-07	6.11e-06
LOC110039369	46.0208	-4.45558	0.863276	-5.16124	2.45e-07	6.46e-06
LOC110034682	40.6884	-4.40791	0.855218	-5.15414	2.55e-07	6.69e-06
LOC110034945	137.141	-1.8189	0.353245	-5.14911	2.62e-07	6.86e-06
LOC110028154	9909.93	-5.67877	1.10545	-5.13708	2.79e-07	7.27e-06
LOC110023428	12292.5	-1.57771	0.307424	-5.13203	2.87e-07	7.44e-06
LOC110033515	83.9616	-3.4579	0.673874	-5.13137	2.88e-07	7.45e-06
LOC110036731	2877.06	-1.93849	0.378296	-5.12426	2.99e-07	7.72e-06
LOC110019012	1217.09	-1.69108	0.330478	-5.11709	3.1e-07	7.98e-06
LOC110039569	3241.9	-3.40841	0.66713	-5.10907	3.24e-07	8.29e-06
LOC110033603	144.831	-2.44505	0.480135	-5.09241	3.54e-07	9e-06
LOC110037398	646.964	-1.90452	0.374057	-5.09153	3.55e-07	9.03e-06
LOC110022601	4986.29	-2.74195	0.539755	-5.07998	3.77e-07	9.5e-06
LOC110024978	2513.7	-2.07694	0.409281	-5.0746	3.88e-07	9.72e-06
LOC110021083	622.644	-2.2669	0.447176	-5.06937	3.99e-07	9.96e-06
LOC110021182	243.217	-6.44346	1.27143	-5.06789	4.02e-07	1e-05
LOC110038679	1847.75	-1.67699	0.331757	-5.05487	4.31e-07	1.07e-05
LOC110028468	860.245	-1.57544	0.311849	-5.05194	4.37e-07	1.08e-05
LOC110038717	1923.87	-2.12339	0.421401	-5.03888	4.68e-07	1.14e-05
LOC110027806	69.3238	-3.40656	0.67869	-5.01931	5.19e-07	1.26e-05
LOC110037767	407.022	-2.8905	0.576927	-5.01016	5.44e-07	1.31e-05
LOC110027715	39.4621	-2.7239	0.544072	-5.00651	5.54e-07	1.34e-05
LOC110025131	8522.61	-1.70724	0.341202	-5.00361	5.63e-07	1.35e-05
LOC110024525	4593.42	-2.59553	0.519656	-4.9947	5.89e-07	1.41e-05
LOC110018790	186.298	-4.06077	0.81622	-4.97509	6.52e-07	1.54e-05
LOC110030028	55.3557	-4.79773	0.965225	-4.97058	6.68e-07	1.57e-05
LOC110036633	321.9	-1.52964	0.308725	-4.95469	7.24e-07	1.69e-05
LOC110031950	55.2789	-6.14578	1.24578	-4.93329	8.09e-07	1.87e-05
LOC110021597	1223.31	-3.14856	0.638946	-4.92774	8.32e-07	1.92e-05
LOC110037061	22.7132	-7.00548	1.42595	-4.91285	8.98e-07	2.05e-05
LOC110035736	255.388	-2.59886	0.530665	-4.89736	9.71e-07	2.2e-05
LOC110027004	252.676	-3.18971	0.651678	-4.89462	9.85e-07	2.22e-05
LOC110033702	78.5649	-2.49685	0.51051	-4.89089	1e-06	2.26e-05
LOC110032166	345.999	-1.69569	0.347372	-4.88148	1.05e-06	2.36e-05
LOC110029975	129.565	-2.38361	0.488749	-4.87696	1.08e-06	2.4e-05
LOC110032746	115.684	-2.00213	0.410941	-4.87207	1.1e-06	2.46e-05
LOC110020293	26.1198	-7.20924	1.48297	-4.86135	1.17e-06	2.59e-05
LOC110038973	3534.51	-1.59251	0.329105	-4.83891	1.31e-06	2.86e-05
LOC110038341	998.342	-2.37347	0.49219	-4.82226	1.42e-06	3.09e-05
LOC110028013	5304.69	-1.51131	0.313642	-4.81859	1.45e-06	3.14e-05
LOC110026366	109.934	-4.46008	0.928093	-4.80564	1.54e-06	3.33e-05
LOC110032582	22.1141	-7.94077	1.65953	-4.78496	1.71e-06	3.67e-05
LOC110033023	218.696	-6.34151	1.32698	-4.77889	1.76e-06	3.78e-05
LOC110036318	5634.74	-1.70204	0.357495	-4.76102	1.93e-06	4.09e-05
LOC110037399	155.435	-1.63827	0.344353	-4.75752	1.96e-06	4.14e-05
LOC110025933	667.986	-1.90674	0.403228	-4.7287	2.26e-06	4.72e-05
LOC110032054	1303.68	-1.90778	0.403619	-4.7267	2.28e-06	4.76e-05
LOC110019535	177.982	-4.49525	0.953248	-4.71571	2.41e-06	5e-05
LOC110033248	621.347	-1.62674	0.344976	-4.71552	2.41e-06	5e-05
LOC110025063	695.288	-1.52218	0.323264	-4.70878	2.49e-06	5.16e-05
LOC110037731	194.26	-1.90488	0.40489	-4.70469	2.54e-06	5.26e-05
LOC110027862	643.756	-1.56697	0.33383	-4.69391	2.68e-06	5.51e-05
LOC110036060	449.185	-1.69523	0.361705	-4.68676	2.78e-06	5.7e-05
LOC110021645	701.457	-2.35784	0.503205	-4.68564	2.79e-06	5.72e-05
LOC110027861	277.532	-1.7732	0.38187	-4.64346	3.43e-06	6.94e-05
LOC110030755	25.9724	-5.72416	1.2362	-4.63046	3.65e-06	7.35e-05
LOC110028797	25.6558	-4.45128	0.962168	-4.62631	3.72e-06	7.49e-05
LOC110038985	1134.53	-1.68383	0.366141	-4.59886	4.25e-06	8.46e-05
LOC110027080	172.456	-1.75948	0.38401	-4.58187	4.61e-06	9.12e-05
LOC110029617	74.3604	-5.26555	1.15109	-4.57442	4.78e-06	9.4e-05
LOC110026231	307.616	-3.20538	0.701192	-4.57133	4.85e-06	9.51e-05
LOC110026522	43.8433	-1.92613	0.422145	-4.56273	5.05e-06	9.88e-05
LOC110035902	32.9607	-2.92273	0.640686	-4.56188	5.07e-06	9.91e-05
LOC110026975	740.736	-1.70882	0.376218	-4.54209	5.57e-06	0.000107725
LOC110032663	1245.59	-2.29751	0.510237	-4.50283	6.71e-06	0.000127713
LOC110019670	629.787	-1.55227	0.345726	-4.48988	7.13e-06	0.000134857
LOC110019783	104.495	-1.82582	0.409024	-4.46385	8.05e-06	0.000150405
LOC110035754	336.063	-2.46567	0.553075	-4.4581	8.27e-06	0.000154006
LOC110023439	152.953	-1.67386	0.376563	-4.44509	8.79e-06	0.000163457
LOC110028220	445.029	-1.70501	0.387937	-4.39507	1.11e-05	0.000201369
LOC110038406	30.2882	-3.31371	0.760164	-4.35921	1.31e-05	0.000233286
LOC110033739	339.163	-2.03765	0.46859	-4.34847	1.37e-05	0.000243773
LOC110031118	34.8084	-3.42331	0.788667	-4.34063	1.42e-05	0.000252382
LOC110022350	43.5617	-2.60513	0.600397	-4.339	1.43e-05	0.000254
LOC110036628	101.431	-3.45166	0.79625	-4.3349	1.46e-05	0.000258523
LOC110027277	5908.17	-1.89709	0.438264	-4.32864	1.5e-05	0.000264653
LOC110022688	293.721	-3.07124	0.710529	-4.32248	1.54e-05	0.000271347
LOC110030603	641.912	-1.84794	0.427625	-4.32141	1.55e-05	0.000272396
LOC110033935	186.012	-3.55172	0.823161	-4.31473	1.6e-05	0.000279372
LOC110022652	42.9855	-2.48595	0.576946	-4.3088	1.64e-05	0.000286111
LOC110030048	139.135	-1.50524	0.349393	-4.30816	1.65e-05	0.000286665
LOC110019312	47.8768	-5.06837	1.17915	-4.29834	1.72e-05	0.000297605
LOC110025517	1178.44	-1.95779	0.457805	-4.27647	1.9e-05	0.000326478
LOC110018777	1067.14	-1.61245	0.377176	-4.27505	1.91e-05	0.000327601
LOC110039568	160.709	-3.3916	0.793507	-4.27419	1.92e-05	0.000328513
LOC110028987	673.557	-1.65384	0.390934	-4.23048	2.33e-05	0.000392539
LOC110032806	1006.77	-1.65729	0.392269	-4.22488	2.39e-05	0.000401292
LOC110037802	115.064	-1.9083	0.45371	-4.206	2.6e-05	0.000432606
LOC110033657	197.084	-2.46343	0.585918	-4.20439	2.62e-05	0.000435287
LOC110019481	17.501	-4.07757	0.97604	-4.17767	2.95e-05	0.00048386
LOC110023167	41.5031	-3.44229	0.824867	-4.17314	3e-05	0.000491666
LOC110030058	981.062	-1.66661	0.39966	-4.17006	3.05e-05	0.000496871
LOC110019341	734.311	-2.07242	0.496995	-4.1699	3.05e-05	0.000496871
LOC110021969	1152.68	-1.55849	0.374115	-4.16581	3.1e-05	0.000505398
LOC110026367	93.0811	-1.61105	0.387237	-4.16037	3.18e-05	0.00051572
LOC110034693	1385.99	-1.54694	0.372051	-4.15786	3.21e-05	0.00051995
LOC110026332	121.52	-9.43457	2.27759	-4.14235	3.44e-05	0.000550855
LOC110036293	409.941	-1.60286	0.387081	-4.1409	3.46e-05	0.000553864
LOC110030827	249.802	-2.36878	0.572863	-4.13498	3.55e-05	0.000567309
LOC110021750	129.337	-2.44085	0.591448	-4.12691	3.68e-05	0.000584941
LOC110021820	556.042	-1.83482	0.444679	-4.12617	3.69e-05	0.000586279
LOC110018262	14.6517	-7.34723	1.78199	-4.12304	3.74e-05	0.000592706
LOC110037859	41.0867	-2.87142	0.697065	-4.1193	3.8e-05	0.000601342
LOC110023518	923.686	-1.54889	0.37709	-4.10747	4e-05	0.00063071
LOC110037994	1193.48	-1.56014	0.380125	-4.10429	4.06e-05	0.00063831
LOC110032962	537.303	-2.66021	0.64831	-4.10331	4.07e-05	0.000640463
LOC110025931	3908.98	-2.72177	0.66411	-4.09837	4.16e-05	0.00065311
LOC110023071	341.375	-1.70219	0.415868	-4.09311	4.26e-05	0.00066574
LOC110028270	1314.11	-4.99204	1.22076	-4.08928	4.33e-05	0.000675454
LOC110025102	427.07	-1.84851	0.452678	-4.0835	4.44e-05	0.000688416
LOC110029036	45.4869	-1.70855	0.421001	-4.05831	4.94e-05	0.000759055
LOC110019100	11.7613	-4.54353	1.11972	-4.05774	4.95e-05	0.000760226
LOC110029233	864.835	-5.00956	1.23608	-4.05276	5.06e-05	0.000775255
LOC110031470	17.9567	-6.66374	1.65113	-4.03586	5.44e-05	0.000825264
LOC110026846	209.965	-3.44609	0.856655	-4.02273	5.75e-05	0.000867576
LOC110019746	477.776	-2.76912	0.692535	-3.99853	6.37e-05	0.000953103
LOC110032636	1088.53	-1.52514	0.381681	-3.99584	6.45e-05	0.000962331
LOC110032075	108.297	-2.46122	0.616195	-3.99423	6.49e-05	0.000968092
LOC110018264	105.99	-1.93889	0.485455	-3.99397	6.5e-05	0.000968355
LOC110034104	373.849	-1.50176	0.377637	-3.97673	6.99e-05	0.00103514
LOC110026380	36.7388	-2.09029	0.525944	-3.97436	7.06e-05	0.00104289
LOC110028392	9.97665	-6.79331	1.71326	-3.96513	7.34e-05	0.00108136
LOC110027885	354.885	-1.55666	0.397482	-3.91631	8.99e-05	0.00130479
LOC110031086	17.2112	-4.58121	1.1701	-3.91524	9.03e-05	0.00130951
LOC110034185	17.7733	-3.71117	0.949343	-3.9092	9.26e-05	0.00134049
LOC110024203	19.1134	-2.73131	0.700029	-3.9017	9.55e-05	0.00137818
LOC110026300	26.1788	-2.7692	0.713353	-3.88195	0.000103624	0.00148064
LOC110032007	38.5516	-2.28835	0.598008	-3.82663	0.000129911	0.00180093
LOC110032914	170.685	-1.59852	0.418208	-3.82232	0.000132203	0.00183127
LOC110031688	1136.92	-1.61346	0.422886	-3.81535	0.000135987	0.00187633
LOC110037541	12.6821	-4.14714	1.0945	-3.78906	0.000151218	0.00205283
LOC110023280	651.384	-1.5932	0.420675	-3.78725	0.000152324	0.00206467
LOC110028228	332.073	-1.56222	0.413114	-3.78157	0.00015584	0.00210105
LOC110034989	3218.97	-2.22653	0.589646	-3.77605	0.000159337	0.00214492
LOC110026378	28.1416	-2.24986	0.596155	-3.77395	0.000160682	0.00215483
LOC110026351	146.602	-1.87244	0.497495	-3.76373	0.000167396	0.00223132
LOC110018089	35.4928	-3.02591	0.804571	-3.7609	0.000169306	0.00224999
LOC110018042	18.1638	-4.10817	1.09429	-3.75419	0.000173903	0.00229727
LOC110032329	201.897	-1.58104	0.421548	-3.75055	0.00017645	0.00232569
LOC110029638	143.771	-1.74543	0.466715	-3.73981	0.00018416	0.00241471
LOC110038446	48.1101	-3.50298	0.936779	-3.73939	0.000184467	0.00241694
LOC110022005	61.7497	-2.21377	0.592339	-3.73734	0.000185974	0.00243262
LOC110031556	398.71	-10.1225	2.70971	-3.73562	0.00018725	0.00244254
LOC110021461	32.5562	-1.98925	0.532647	-3.73465	0.000187974	0.00245017
LOC110026034	92.2027	-6.10596	1.63583	-3.73265	0.000189479	0.00246615
LOC110021938	231.679	-2.45635	0.663654	-3.70125	0.000214544	0.00274787
LOC110020599	95.0057	-10.0429	2.7144	-3.69986	0.000215722	0.00276096
LOC110021491	81.8665	-2.43211	0.658892	-3.69121	0.000223187	0.00284826
LOC110036606	379.428	-2.35685	0.63898	-3.68845	0.000225624	0.0028752
LOC110020227	49.7348	-2.81672	0.764061	-3.68651	0.000227351	0.00289303
LOC110024555	16.6225	-3.76359	1.02185	-3.68313	0.000230386	0.00292534
LOC110027166	55.3667	-2.43519	0.661789	-3.6797	0.000233504	0.00295432
LOC110032905	443.642	-1.83851	0.503573	-3.65093	0.000261293	0.00325236
LOC110037828	151.059	-2.29569	0.634326	-3.6191	0.000295633	0.00362617
LOC110035168	20.9016	-2.71795	0.753432	-3.60743	0.000309241	0.00376694
LOC110025323	539.324	-1.77094	0.49125	-3.60496	0.000312197	0.0037976
LOC110019747	334.867	-2.72948	0.75718	-3.60479	0.000312403	0.0037976
LOC110024542	82.884	-3.7561	1.04506	-3.59415	0.000325452	0.00392965
LOC110033931	11.3577	-5.99702	1.67264	-3.58536	0.000336614	0.00404463
LOC110035267	18.4899	-3.03055	0.848277	-3.5726	0.000353459	0.00421551
LOC110018332	67.5358	-1.66071	0.470668	-3.52842	0.000418053	0.00486444
LOC110037228	2097.76	-1.97727	0.560568	-3.52726	0.000419881	0.00487928
LOC110032506	17.1998	-5.09431	1.44443	-3.52688	0.000420495	0.00488321
LOC110027492	123.986	-1.59146	0.451613	-3.52395	0.000425169	0.00491489
LOC110020089	86.3481	-2.53569	0.721418	-3.51487	0.000439965	0.0050496
LOC110027711	34.946	-1.88387	0.538265	-3.49989	0.000465459	0.00528727
LOC110027154	263.39	-2.88023	0.828133	-3.47798	0.000505208	0.0056308
LOC110028231	274.471	-2.06824	0.595875	-3.47092	0.000518674	0.00576939
LOC110023576	6.85129	-6.24979	1.80888	-3.45507	0.000550149	0.00607363
LOC110031261	484.691	-1.88386	0.546114	-3.44957	0.00056147	0.00616717
LOC110020041	75.1827	-1.62675	0.471956	-3.44683	0.000567207	0.00621923
LOC110021632	8.96931	-5.64429	1.64591	-3.42928	0.000605174	0.00655419
LOC110030201	177.214	-2.92996	0.856278	-3.42174	0.000622217	0.00668553
LOC110039483	49.1027	-2.22225	0.650146	-3.41808	0.00063064	0.00676369
LOC110033660	8.82885	-5.63199	1.65063	-3.41203	0.000644803	0.00688616
LOC110028896	163.371	-1.8848	0.553259	-3.40673	0.000657465	0.00700042
LOC110032747	26.5345	-2.01671	0.593005	-3.40083	0.000671813	0.00709034
LOC110023818	260.335	-2.92086	0.858961	-3.40046	0.00067273	0.00709034
LOC110022645	144.458	-2.39582	0.705108	-3.39781	0.000679279	0.00714233
LOC110018861	52.6379	-2.08432	0.61641	-3.38139	0.000721211	0.00749848
LOC110033183	403.767	-1.7614	0.524452	-3.35855	0.00078352	0.00802824
LOC110031318	510.457	-5.11579	1.5243	-3.35615	0.000790361	0.00808896
LOC110032411	1003.42	-1.56602	0.467398	-3.3505	0.000806661	0.00821772
LOC110018958	313.062	-1.55499	0.465056	-3.34366	0.000826818	0.00835564
LOC110024036	55.9139	-1.55975	0.466895	-3.34068	0.000835729	0.00842162
LOC110022638	52.3208	-1.90986	0.572646	-3.33514	0.000852556	0.00855703
LOC110026810	369.411	-1.52611	0.45843	-3.32898	0.000871634	0.00872375
LOC110019350	14.5049	-3.15338	0.947568	-3.32786	0.000875151	0.00874904
LOC110020316	215.443	-1.67212	0.502787	-3.32571	0.000881952	0.00880358
LOC110035322	41.7763	-2.5756	0.776803	-3.31564	0.000914328	0.00908005

## Sheet: GO
Table S4 The GO classification of DEGs
ID	Description	GeneRatio	BgRatio	pvalue	p.adjust	qvalue	geneID	Count
GO:0010200	response to chitin	34/474	114/7053	3.39104e-14	5.78173e-11	5.40425e-11	LOC110025391/LOC110036024/LOC110039248/LOC110020963/LOC110027443/LOC110029484/LOC110035598/LOC110022599/LOC110027082/LOC110037799/LOC110036629/LOC110036650/LOC110033064/LOC110021306/LOC110029720/LOC110036559/LOC110020274/LOC110026801/LOC110029229/LOC110027150/LOC110037754/LOC110028464/LOC110022476/LOC110020162/LOC110022840/LOC110029984/LOC110022820/LOC110021667/LOC110021163/LOC110021235/LOC110036…	34
GO:0010243	response to organonitrogen compound	42/474	191/7053	3.03764e-12	2.58959e-09	2.42052e-09	LOC110025391/LOC110036024/LOC110039248/LOC110020963/LOC110027443/LOC110029484/LOC110035598/LOC110022599/LOC110027082/LOC110037799/LOC110028229/LOC110036629/LOC110036650/LOC110033064/LOC110037031/LOC110021306/LOC110029720/LOC110036559/LOC110020274/LOC110038259/LOC110026801/LOC110029229/LOC110023763/LOC110027150/LOC110037754/LOC110028464/LOC110022476/LOC110020162/LOC110022840/LOC110029984/LOC110022…	42
GO:0009404	toxin metabolic process	12/474	35/7053	1.48325e-06	0.000842979	0.000787943	LOC110035598/LOC110034648/LOC110036559/LOC110035233/LOC110028873/LOC110037754/LOC110028464/LOC110028872/LOC110036362/LOC110037394/LOC110023027/LOC110033240	12
GO:2000038	regulation of stomatal complex development	6/474	10/7053	1.48641e-05	0.00515027	0.00481402	LOC110020165/LOC110024030/LOC110019989/LOC110032051/LOC110038679/LOC110019100	6
GO:0080167	response to karrikin	20/474	104/7053	1.51034e-05	0.00515027	0.00481402	LOC110022393/LOC110018798/LOC110033145/LOC110025017/LOC110023375/LOC110038103/LOC110027082/LOC110034648/LOC110033647/LOC110037031/LOC110035233/LOC110028873/LOC110031303/LOC110028872/LOC110037192/LOC110030958/LOC110031047/LOC110024270/LOC110023027/LOC110020089	20
GO:0007623	circadian rhythm	16/474	78/7053	4.73221e-05	0.0115263	0.0107738	LOC110027028/LOC110029507/LOC110023375/LOC110033051/LOC110019471/LOC110038787/LOC110023449/LOC110020906/LOC110037681/LOC110025280/LOC110027045/LOC110022349/LOC110022335/LOC110024447/LOC110039462/LOC110023014	16
GO:0048511	rhythmic process	16/474	78/7053	4.73221e-05	0.0115263	0.0107738	LOC110027028/LOC110029507/LOC110023375/LOC110033051/LOC110019471/LOC110038787/LOC110023449/LOC110020906/LOC110037681/LOC110025280/LOC110027045/LOC110022349/LOC110022335/LOC110024447/LOC110039462/LOC110023014	16
GO:0009611	response to wounding	26/474	172/7053	7.23707e-05	0.015424	0.014417	LOC110039248/LOC110029949/LOC110029951/LOC110033294/LOC110022556/LOC110029484/LOC110028166/LOC110032486/LOC110029950/LOC110028229/LOC110029720/LOC110018382/LOC110026801/LOC110029229/LOC110022840/LOC110028287/LOC110025909/LOC110029924/LOC110036445/LOC110032131/LOC110032711/LOC110022349/LOC110022335/LOC110036023/LOC110019012/LOC110025063	26
GO:0016405	CoA-ligase activity	6/474	13/7053	0.000101985	0.0184542	0.0172494	LOC110026381/LOC110035006/LOC110038424/LOC110038923/LOC110020293/LOC110018262	6
GO:0009863	salicylic acid mediated signaling pathway	8/474	24/7053	0.00011039	0.0184542	0.0172494	LOC110036650/LOC110029720/LOC110024419/LOC110026801/LOC110021188/LOC110019453/LOC110032131/LOC110026841	8
GO:0071215	cellular response to abscisic acid stimulus	18/474	102/7053	0.000129883	0.0184542	0.0172494	LOC110029951/LOC110020165/LOC110024030/LOC110030781/LOC110024201/LOC110028589/LOC110024494/LOC110024023/LOC110033880/LOC110031670/LOC110031377/LOC110022349/LOC110022335/LOC110037226/LOC110026323/LOC110028468/LOC110019100/LOC110032914	18
GO:0097306	cellular response to alcohol	18/474	102/7053	0.000129883	0.0184542	0.0172494	LOC110029951/LOC110020165/LOC110024030/LOC110030781/LOC110024201/LOC110028589/LOC110024494/LOC110024023/LOC110033880/LOC110031670/LOC110031377/LOC110022349/LOC110022335/LOC110037226/LOC110026323/LOC110028468/LOC110019100/LOC110032914	18
GO:0071446	cellular response to salicylic acid stimulus	8/474	26/7053	0.000208034	0.021092	0.0197149	LOC110036650/LOC110029720/LOC110024419/LOC110026801/LOC110021188/LOC110019453/LOC110032131/LOC110026841	8
GO:0009403	toxin biosynthetic process	7/474	20/7053	0.000212701	0.021092	0.0197149	LOC110035598/LOC110036559/LOC110037754/LOC110028464/LOC110036362/LOC110037394/LOC110033240	7
GO:0052314	phytoalexin metabolic process	7/474	20/7053	0.000212701	0.021092	0.0197149	LOC110035598/LOC110036559/LOC110037754/LOC110028464/LOC110036362/LOC110037394/LOC110033240	7
GO:0052315	phytoalexin biosynthetic process	7/474	20/7053	0.000212701	0.021092	0.0197149	LOC110035598/LOC110036559/LOC110037754/LOC110028464/LOC110036362/LOC110037394/LOC110033240	7
GO:0010150	leaf senescence	16/474	88/7053	0.000213155	0.021092	0.0197149	LOC110033451/LOC110025348/LOC110020963/LOC110023726/LOC110022599/LOC110032374/LOC110021306/LOC110028589/LOC110034304/LOC110021235/LOC110021977/LOC110031103/LOC110037226/LOC110036855/LOC110021182/LOC110020089	16
GO:0034605	cellular response to heat	9/474	33/7053	0.000233189	0.021092	0.0197149	LOC110035598/LOC110036559/LOC110037754/LOC110028464/LOC110032131/LOC110036362/LOC110024270/LOC110028360/LOC110024978	9
GO:0009738	abscisic acid-activated signaling pathway	15/474	80/7053	0.000235043	0.021092	0.0197149	LOC110029951/LOC110020165/LOC110024030/LOC110030781/LOC110024201/LOC110024494/LOC110033880/LOC110031377/LOC110022349/LOC110022335/LOC110037226/LOC110026323/LOC110028468/LOC110019100/LOC110032914	15
GO:0090693	plant organ senescence	16/474	92/7053	0.000361657	0.0308313	0.0288184	LOC110033451/LOC110025348/LOC110020963/LOC110023726/LOC110022599/LOC110032374/LOC110021306/LOC110028589/LOC110034304/LOC110021235/LOC110021977/LOC110031103/LOC110037226/LOC110036855/LOC110021182/LOC110020089	16
GO:0016877	ligase activity, forming carbon-sulfur bonds	6/474	16/7053	0.00039988	0.0324665	0.0303468	LOC110026381/LOC110035006/LOC110038424/LOC110038923/LOC110020293/LOC110018262	6
GO:0005509	calcium ion binding	15/474	85/7053	0.000466699	0.0361691	0.0338077	LOC110024910/LOC110029949/LOC110023124/LOC110029484/LOC110018337/LOC110035214/LOC110029950/LOC110024201/LOC110021831/LOC110018382/LOC110030105/LOC110034832/LOC110030989/LOC110025909/LOC110019012	15
GO:0009751	response to salicylic acid	20/474	134/7053	0.000575539	0.0420537	0.0393081	LOC110039248/LOC110025017/LOC110022599/LOC110028229/LOC110036650/LOC110021306/LOC110029720/LOC110024419/LOC110026801/LOC110029229/LOC110021188/LOC110019453/LOC110020906/LOC110032131/LOC110026841/LOC110025280/LOC110038163/LOC110022349/LOC110022335/LOC110023014	20
GO:0007568	aging	16/474	96/7053	0.000591958	0.0420537	0.0393081	LOC110033451/LOC110025348/LOC110020963/LOC110023726/LOC110022599/LOC110032374/LOC110021306/LOC110028589/LOC110034304/LOC110021235/LOC110021977/LOC110031103/LOC110037226/LOC110036855/LOC110021182/LOC110020089	16
GO:0070370	cellular heat acclimation	5/474	12/7053	0.000715465	0.0487947	0.045609	LOC110035598/LOC110036559/LOC110037754/LOC110028464/LOC110036362	5
GO:0046885	regulation of hormone biosynthetic process	7/474	27/7053	0.00161425	0.0949997	0.0887974	LOC110018457/LOC110023726/LOC110022099/LOC110024792/LOC110020906/LOC110021977/LOC110035505	7
GO:0010120	camalexin biosynthetic process	5/474	14/7053	0.00161583	0.0949997	0.0887974	LOC110035598/LOC110036559/LOC110037754/LOC110028464/LOC110036362	5
GO:0010506	regulation of autophagy	5/474	14/7053	0.00161583	0.0949997	0.0887974	LOC110035598/LOC110036559/LOC110037754/LOC110028464/LOC110036362	5
GO:0052317	camalexin metabolic process	5/474	14/7053	0.00161583	0.0949997	0.0887974	LOC110035598/LOC110036559/LOC110037754/LOC110028464/LOC110036362	5
GO:0071236	cellular response to antibiotic	8/474	35/7053	0.00183348	0.102347	0.0956648	LOC110036650/LOC110029720/LOC110024419/LOC110026801/LOC110021188/LOC110019453/LOC110032131/LOC110026841	8
GO:0031347	regulation of defense response	22/474	168/7053	0.00186085	0.102347	0.0956648	LOC110039248/LOC110018457/LOC110018441/LOC110039157/LOC110029484/LOC110022599/LOC110036650/LOC110021306/LOC110029720/LOC110024419/LOC110026801/LOC110029229/LOC110036891/LOC110019453/LOC110023020/LOC110032131/LOC110036869/LOC110034469/LOC110036855/LOC110032051/LOC110018528/LOC110019012	22
GO:0050832	defense response to fungus	23/474	181/7053	0.00220866	0.108758	0.101657	LOC110039248/LOC110029951/LOC110039157/LOC110035598/LOC110032486/LOC110032336/LOC110036650/LOC110029720/LOC110036559/LOC110020274/LOC110034832/LOC110026801/LOC110029229/LOC110031081/LOC110037754/LOC110028464/LOC110020162/LOC110034390/LOC110022820/LOC110038290/LOC110036362/LOC110038923/LOC110031261	23
GO:0009407	toxin catabolic process	5/474	15/7053	0.00229133	0.108758	0.101657	LOC110034648/LOC110035233/LOC110028873/LOC110028872/LOC110023027	5
GO:0009700	indole phytoalexin biosynthetic process	5/474	15/7053	0.00229133	0.108758	0.101657	LOC110035598/LOC110036559/LOC110037754/LOC110028464/LOC110036362	5
GO:0046217	indole phytoalexin metabolic process	5/474	15/7053	0.00229133	0.108758	0.101657	LOC110035598/LOC110036559/LOC110037754/LOC110028464/LOC110036362	5
GO:0035690	cellular response to drug	10/474	53/7053	0.00242053	0.108758	0.101657	LOC110036650/LOC110033064/LOC110029720/LOC110024419/LOC110026801/LOC110021188/LOC110019453/LOC110032131/LOC110019177/LOC110026841	10
GO:1900055	regulation of leaf senescence	7/474	29/7053	0.00252378	0.108758	0.101657	LOC110020165/LOC110024030/LOC110036650/LOC110021174/LOC110021974/LOC110023451/LOC110019100	7
GO:0044550	secondary metabolite biosynthetic process	21/474	163/7053	0.00286073	0.108758	0.101657	LOC110035598/LOC110036559/LOC110022396/LOC110037754/LOC110028464/LOC110026915/LOC110038911/LOC110037254/LOC110036362/LOC110018250/LOC110031047/LOC110038597/LOC110035006/LOC110037394/LOC110031874/LOC110027892/LOC110024447/LOC110033240/LOC110023518/LOC110037994/LOC110031470	21
GO:0016620	oxidoreductase activity, acting on the aldehyde or oxo group of donors, NAD or NADP as acceptor	4/474	10/7053	0.00305274	0.108758	0.101657	LOC110027892/LOC110024447/LOC110037994/LOC110031470	4
GO:0018973	trinitrotoluene metabolic process	4/474	10/7053	0.00305274	0.108758	0.101657	LOC110034648/LOC110035233/LOC110028873/LOC110028872	4
GO:0018974	2,4,6-trinitrotoluene metabolic process	4/474	10/7053	0.00305274	0.108758	0.101657	LOC110034648/LOC110035233/LOC110028873/LOC110028872	4
GO:0019326	nitrotoluene metabolic process	4/474	10/7053	0.00305274	0.108758	0.101657	LOC110034648/LOC110035233/LOC110028873/LOC110028872	4
GO:0046256	2,4,6-trinitrotoluene catabolic process	4/474	10/7053	0.00305274	0.108758	0.101657	LOC110034648/LOC110035233/LOC110028873/LOC110028872	4
GO:0046260	trinitrotoluene catabolic process	4/474	10/7053	0.00305274	0.108758	0.101657	LOC110034648/LOC110035233/LOC110028873/LOC110028872	4
GO:0046263	nitrotoluene catabolic process	4/474	10/7053	0.00305274	0.108758	0.101657	LOC110034648/LOC110035233/LOC110028873/LOC110028872	4
GO:0072490	toluene-containing compound metabolic process	4/474	10/7053	0.00305274	0.108758	0.101657	LOC110034648/LOC110035233/LOC110028873/LOC110028872	4
GO:0072491	toluene-containing compound catabolic process	4/474	10/7053	0.00305274	0.108758	0.101657	LOC110034648/LOC110035233/LOC110028873/LOC110028872	4
GO:0009765	photosynthesis, light harvesting	5/474	16/7053	0.00315108	0.108758	0.101657	LOC110023588/LOC110031670/LOC110020107/LOC110038717/LOC110021645	5
GO:1901681	sulfur compound binding	5/474	16/7053	0.00315108	0.108758	0.101657	LOC110034648/LOC110035233/LOC110028873/LOC110028872/LOC110027492	5
GO:0010193	response to ozone	8/474	38/7053	0.00318939	0.108758	0.101657	LOC110029949/LOC110022556/LOC110022599/LOC110029950/LOC110021306/LOC110018382/LOC110025909/LOC110036023	8
GO:0010287	plastoglobule	6/474	24/7053	0.00423938	0.141728	0.132475	LOC110032486/LOC110023588/LOC110033126/LOC110031670/LOC110038717/LOC110021645	6
GO:0010030	positive regulation of seed germination	4/474	11/7053	0.00454482	0.146206	0.136661	LOC110024270/LOC110037226/LOC110035791/LOC110038923	4
GO:1902456	regulation of stomatal opening	4/474	11/7053	0.00454482	0.146206	0.136661	LOC110020165/LOC110024030/LOC110019177/LOC110019100	4
GO:0009753	response to jasmonic acid	23/474	192/7053	0.00468842	0.148033	0.138368	LOC110022556/LOC110025017/LOC110029484/LOC110032486/LOC110030781/LOC110028229/LOC110036650/LOC110021188/LOC110028720/LOC110022840/LOC110020906/LOC110032131/LOC110023451/LOC110034469/LOC110025280/LOC110038163/LOC110022349/LOC110022335/LOC110023014/LOC110019012/LOC110027885/LOC110035168/LOC110033183	23
GO:0004312	fatty acid synthase activity	5/474	18/7053	0.00552688	0.169532	0.158464	LOC110027349/LOC110026642/LOC110017804/LOC110028965/LOC110037828	5
GO:0009639	response to red or far red light	14/474	98/7053	0.00556821	0.169532	0.158464	LOC110027082/LOC110030934/LOC110038145/LOC110026915/LOC110031658/LOC110035489/LOC110024270/LOC110031670/LOC110021308/LOC110023027/LOC110018312/LOC110039462/LOC110028262/LOC110021750	14
GO:0016878	acid-thiol ligase activity	4/474	12/7053	0.0064595	0.175292	0.163848	LOC110026381/LOC110035006/LOC110038424/LOC110038923	4
GO:0043295	glutathione binding	4/474	12/7053	0.0064595	0.175292	0.163848	LOC110034648/LOC110035233/LOC110028873/LOC110028872	4
GO:0070413	trehalose metabolism in response to stress	4/474	12/7053	0.0064595	0.175292	0.163848	LOC110021707/LOC110027413/LOC110029837/LOC110035746	4
GO:0072341	modified amino acid binding	4/474	12/7053	0.0064595	0.175292	0.163848	LOC110034648/LOC110035233/LOC110028873/LOC110028872	4
GO:1900750	oligopeptide binding	4/474	12/7053	0.0064595	0.175292	0.163848	LOC110034648/LOC110035233/LOC110028873/LOC110028872	4
GO:2000030	regulation of response to red or far red light	7/474	34/7053	0.00649977	0.175292	0.163848	LOC110027082/LOC110034648/LOC110035233/LOC110028873/LOC110028872/LOC110028745/LOC110028262	7
GO:0071396	cellular response to lipid	22/474	186/7053	0.00652555	0.175292	0.163848	LOC110029951/LOC110020165/LOC110024030/LOC110030781/LOC110024201/LOC110028589/LOC110024494/LOC110024023/LOC110039286/LOC110024792/LOC110034485/LOC110033880/LOC110031670/LOC110031377/LOC110022349/LOC110022335/LOC110037226/LOC110026323/LOC110028468/LOC110019100/LOC110027885/LOC110032914	22
GO:0009408	response to heat	16/474	121/7053	0.00677653	0.175292	0.163848	LOC110035598/LOC110029720/LOC110036559/LOC110026801/LOC110037754/LOC110028464/LOC110026915/LOC110032131/LOC110036362/LOC110026020/LOC110024270/LOC110021441/LOC110028360/LOC110035275/LOC110024978/LOC110035168	16
GO:0004364	glutathione transferase activity	5/474	19/7053	0.00709394	0.175292	0.163848	LOC110034648/LOC110035233/LOC110028873/LOC110028872/LOC110023027	5
GO:0015179	L-amino acid transmembrane transporter activity	5/474	19/7053	0.00709394	0.175292	0.163848	LOC110022393/LOC110027496/LOC110033647/LOC110037982/LOC110029310	5
GO:0015807	L-amino acid transport	5/474	19/7053	0.00709394	0.175292	0.163848	LOC110022393/LOC110027496/LOC110033647/LOC110037982/LOC110029310	5
GO:0046906	tetrapyrrole binding	5/474	19/7053	0.00709394	0.175292	0.163848	LOC110023588/LOC110031670/LOC110038717/LOC110021645/LOC110031118	5
GO:1902475	L-alpha-amino acid transmembrane transport	5/474	19/7053	0.00709394	0.175292	0.163848	LOC110022393/LOC110027496/LOC110033647/LOC110037982/LOC110029310	5
GO:0032350	regulation of hormone metabolic process	7/474	35/7053	0.00766634	0.186	0.173857	LOC110018457/LOC110023726/LOC110022099/LOC110024792/LOC110020906/LOC110021977/LOC110035505	7
GO:0015238	#N/A	10/474	62/7053	0.00776748	0.186	0.173857	LOC110022393/LOC110021539/LOC110033647/LOC110033792/LOC110037738/LOC110034016/LOC110019177/LOC110025071/LOC110036855/LOC110031076	10
GO:0071489	cellular response to red or far red light	6/474	27/7053	0.00785455	0.186	0.173857	LOC110031658/LOC110035489/LOC110024270/LOC110018312/LOC110039462/LOC110028262	6
GO:0005992	trehalose biosynthetic process	4/474	13/7053	0.008842	0.194826	0.182107	LOC110021707/LOC110027413/LOC110029837/LOC110035746	4
GO:0016903	oxidoreductase activity, acting on the aldehyde or oxo group of donors	4/474	13/7053	0.008842	0.194826	0.182107	LOC110027892/LOC110024447/LOC110037994/LOC110031470	4
GO:0051606	detection of stimulus	7/474	36/7053	0.00898058	0.194826	0.182107	LOC110028691/LOC110029450/LOC110028699/LOC110031658/LOC110035489/LOC110028262/LOC110020089	7
GO:0009787	regulation of abscisic acid-activated signaling pathway	12/474	83/7053	0.00902268	0.194826	0.182107	LOC110020165/LOC110025017/LOC110024030/LOC110032336/LOC110031245/LOC110037226/LOC110026323/LOC110018061/LOC110035791/LOC110028468/LOC110027004/LOC110019100	12
GO:1901419	regulation of response to alcohol	12/474	83/7053	0.00902268	0.194826	0.182107	LOC110020165/LOC110025017/LOC110024030/LOC110032336/LOC110031245/LOC110037226/LOC110026323/LOC110018061/LOC110035791/LOC110028468/LOC110027004/LOC110019100	12
GO:1905957	regulation of cellular response to alcohol	12/474	83/7053	0.00902268	0.194826	0.182107	LOC110020165/LOC110025017/LOC110024030/LOC110032336/LOC110031245/LOC110037226/LOC110026323/LOC110018061/LOC110035791/LOC110028468/LOC110027004/LOC110019100	12
GO:0002831	regulation of response to biotic stimulus	9/474	54/7053	0.00914141	0.194826	0.182107	LOC110018457/LOC110029720/LOC110024419/LOC110026801/LOC110036891/LOC110019453/LOC110023020/LOC110034469/LOC110032051	9
GO:0010119	regulation of stomatal movement	9/474	54/7053	0.00914141	0.194826	0.182107	LOC110039157/LOC110020165/LOC110024030/LOC110025508/LOC110026797/LOC110019177/LOC110031670/LOC110037226/LOC110019100	9
GO:0006790	sulfur compound metabolic process	16/474	127/7053	0.0106835	0.224881	0.210199	LOC110029469/LOC110035598/LOC110034648/LOC110036559/LOC110035233/LOC110028873/LOC110031081/LOC110037754/LOC110028464/LOC110020427/LOC110028872/LOC110027633/LOC110036362/LOC110035006/LOC110023027/LOC110027892	16
GO:0046686	response to cadmium ion	20/474	172/7053	0.0110926	0.228179	0.213282	LOC110024910/LOC110025017/LOC110034648/LOC110035233/LOC110028873/LOC110024760/LOC110022221/LOC110028872/LOC110018415/LOC110023451/LOC110025280/LOC110038163/LOC110026604/LOC110035275/LOC110038923/LOC110023014/LOC110021182/LOC110019670/LOC110023518/LOC110033183	20
GO:0010114	response to red light	5/474	21/7053	0.0111078	0.228179	0.213282	LOC110038145/LOC110026915/LOC110024270/LOC110031670/LOC110021308	5
GO:0010286	heat acclimation	6/474	29/7053	0.0112481	0.22831	0.213404	LOC110035598/LOC110036559/LOC110037754/LOC110028464/LOC110036362/LOC110035168	6
GO:0046777	protein autophosphorylation	17/474	139/7053	0.0115064	0.229929	0.214918	LOC110020165/LOC110024030/LOC110021138/LOC110032336/LOC110024201/LOC110032714/LOC110038259/LOC110037395/LOC110028286/LOC110023763/LOC110035924/LOC110024494/LOC110024023/LOC110028287/LOC110027506/LOC110028202/LOC110019100	17
GO:0010112	regulation of systemic acquired resistance	4/474	14/7053	0.0117325	0.229929	0.214918	LOC110018457/LOC110029720/LOC110026801/LOC110034469	4
GO:0042447	hormone catabolic process	4/474	14/7053	0.0117325	0.229929	0.214918	LOC110023168/LOC110038145/LOC110031047/LOC110021750	4
GO:2000242	negative regulation of reproductive process	9/474	57/7053	0.0129452	0.248891	0.232641	LOC110027028/LOC110024123/LOC110018965/LOC110033897/LOC110038561/LOC110038787/LOC110037226/LOC110018312/LOC110039462	9
GO:0006633	fatty acid biosynthetic process	6/474	30/7053	0.0132839	0.248891	0.232641	LOC110038911/LOC110037254/LOC110037188/LOC110017804/LOC110028965/LOC110037828	6
GO:0042435	indole-containing compound biosynthetic process	6/474	30/7053	0.0132839	0.248891	0.232641	LOC110035598/LOC110036559/LOC110022099/LOC110037754/LOC110028464/LOC110036362	6
GO:1901568	fatty acid derivative metabolic process	6/474	30/7053	0.0132839	0.248891	0.232641	LOC110025017/LOC110032486/LOC110027349/LOC110038911/LOC110026642/LOC110027892	6
GO:0005991	trehalose metabolic process	4/474	15/7053	0.0151656	0.272183	0.254412	LOC110021707/LOC110027413/LOC110029837/LOC110035746	4
GO:0009635	response to herbicide	4/474	15/7053	0.0151656	0.272183	0.254412	LOC110034648/LOC110035233/LOC110028873/LOC110028872	4
GO:0030308	negative regulation of cell growth	4/474	15/7053	0.0151656	0.272183	0.254412	LOC110036163/LOC110032336/LOC110019989/LOC110038679	4
GO:0042761	very long-chain fatty acid biosynthetic process	4/474	15/7053	0.0151656	0.272183	0.254412	LOC110038911/LOC110037254/LOC110037188/LOC110028965	4
GO:0051241	negative regulation of multicellular organismal process	13/474	100/7053	0.0159092	0.28103	0.262682	LOC110027028/LOC110024123/LOC110018965/LOC110036650/LOC110021174/LOC110033897/LOC110038561/LOC110038787/LOC110023451/LOC110037226/LOC110018312/LOC110039462/LOC110032051	13
GO:0000302	response to reactive oxygen species	17/474	144/7053	0.0159882	0.28103	0.262682	LOC110029949/LOC110022556/LOC110022599/LOC110029950/LOC110021306/LOC110020274/LOC110018382/LOC110020162/LOC110022820/LOC110025909/LOC110037681/LOC110022349/LOC110022335/LOC110036023/LOC110017809/LOC110024978/LOC110020089	17
GO:0016709	oxidoreductase activity, acting on paired donors, with incorporation or reduction of molecular oxygen, NAD(P)H as one donor, and incorporation of one atom of oxygen	10/474	69/7053	0.0161657	0.28125	0.262888	LOC110030934/LOC110022396/LOC110024792/LOC110026915/LOC110018250/LOC110038597/LOC110037394/LOC110023778/LOC110033240/LOC110033260	10
GO:0008171	O-methyltransferase activity	5/474	23/7053	0.016442	0.283167	0.26468	LOC110029924/LOC110032624/LOC110039569/LOC110039568/LOC110023518	5
GO:0071369	cellular response to ethylene stimulus	8/474	50/7053	0.0172934	0.294852	0.275602	LOC110028166/LOC110037822/LOC110020274/LOC110020162/LOC110022820/LOC110019804/LOC110026020/LOC110035168	8
GO:0062012	regulation of small molecule metabolic process	9/474	60/7053	0.0178151	0.300741	0.281106	LOC110033451/LOC110018457/LOC110023726/LOC110025017/LOC110033898/LOC110021977/LOC110035505/LOC110027014/LOC110022638	9
GO:0015171	amino acid transmembrane transporter activity	6/474	32/7053	0.0181014	0.302578	0.282823	LOC110022393/LOC110027496/LOC110033647/LOC110037982/LOC110029310/LOC110036633	6
GO:0048037	obsolete cofactor binding	13/474	102/7053	0.0185339	0.3068	0.286769	LOC110022897/LOC110034648/LOC110035233/LOC110028873/LOC110028872/LOC110018906/LOC110036591/LOC110023588/LOC110031670/LOC110017804/LOC110038717/LOC110021645/LOC110031118	13
GO:0030100	regulation of endocytosis	4/474	16/7053	0.0191704	0.314285	0.293766	LOC110018571/LOC110024419/LOC110019453/LOC110029984	4
GO:0006749	glutathione metabolic process	5/474	24/7053	0.0196532	0.31913	0.298295	LOC110034648/LOC110035233/LOC110028873/LOC110028872/LOC110023027	5
GO:0015297	antiporter activity	6/474	33/7053	0.0209083	0.335352	0.313457	LOC110021539/LOC110037982/LOC110037738/LOC110029310/LOC110025071/LOC110021182	6
GO:0048581	negative regulation of post-embryonic development	10/474	72/7053	0.0213234	0.335352	0.313457	LOC110027028/LOC110024123/LOC110018965/LOC110033897/LOC110038561/LOC110038787/LOC110037226/LOC110018312/LOC110039462/LOC110032051	10
GO:0016791	phosphatase activity	13/474	104/7053	0.0214729	0.335352	0.313457	LOC110029951/LOC110021707/LOC110027413/LOC110029837/LOC110023786/LOC110035093/LOC110024926/LOC110035746/LOC110022915/LOC110037226/LOC110027888/LOC110035791/LOC110037767	13
GO:0004497	monooxygenase activity	14/474	115/7053	0.0214798	0.335352	0.313457	LOC110032486/LOC110030934/LOC110022396/LOC110024792/LOC110026915/LOC110038911/LOC110018250/LOC110038597/LOC110037394/LOC110023778/LOC110033240/LOC110033260/LOC110026846/LOC110036606	14
GO:0071214	cellular response to abiotic stimulus	16/474	138/7053	0.022268	0.335352	0.313457	LOC110028166/LOC110034648/LOC110035233/LOC110028873/LOC110024023/LOC110028872/LOC110031658/LOC110029984/LOC110035489/LOC110024270/LOC110021308/LOC110018312/LOC110019989/LOC110039462/LOC110028262/LOC110038679	16
GO:0104004	cellular response to environmental stimulus	16/474	138/7053	0.022268	0.335352	0.313457	LOC110028166/LOC110034648/LOC110035233/LOC110028873/LOC110024023/LOC110028872/LOC110031658/LOC110029984/LOC110035489/LOC110024270/LOC110021308/LOC110018312/LOC110019989/LOC110039462/LOC110028262/LOC110038679	16
GO:0042631	cellular response to water deprivation	7/474	43/7053	0.0231486	0.335352	0.313457	LOC110034648/LOC110035233/LOC110028873/LOC110024023/LOC110028872/LOC110019989/LOC110038679	7
GO:0071462	cellular response to water stimulus	7/474	43/7053	0.0231486	0.335352	0.313457	LOC110034648/LOC110035233/LOC110028873/LOC110024023/LOC110028872/LOC110019989/LOC110038679	7
GO:0051090	regulation of DNA-binding transcription factor activity	5/474	25/7053	0.0232495	0.335352	0.313457	LOC110029484/LOC110036869/LOC110025280/LOC110023014/LOC110019012	5
GO:0000038	very long-chain fatty acid metabolic process	4/474	17/7053	0.0237703	0.335352	0.313457	LOC110038911/LOC110037254/LOC110037188/LOC110028965	4
GO:0005310	dicarboxylic acid transmembrane transporter activity	4/474	17/7053	0.0237703	0.335352	0.313457	LOC110022393/LOC110021539/LOC110033647/LOC110025071	4
GO:0006835	dicarboxylic acid transport	4/474	17/7053	0.0237703	0.335352	0.313457	LOC110022393/LOC110021539/LOC110033647/LOC110025071	4
GO:0015556	C4-dicarboxylate transmembrane transporter activity	4/474	17/7053	0.0237703	0.335352	0.313457	LOC110022393/LOC110021539/LOC110033647/LOC110025071	4
GO:0015740	C4-dicarboxylate transport	4/474	17/7053	0.0237703	0.335352	0.313457	LOC110022393/LOC110021539/LOC110033647/LOC110025071	4
GO:0046351	disaccharide biosynthetic process	4/474	17/7053	0.0237703	0.335352	0.313457	LOC110021707/LOC110027413/LOC110029837/LOC110035746	4
GO:0003333	amino acid transmembrane transport	6/474	34/7053	0.0239958	0.335352	0.313457	LOC110022393/LOC110027496/LOC110033647/LOC110037982/LOC110029310/LOC110036633	6
GO:0006865	amino acid transport	6/474	34/7053	0.0239958	0.335352	0.313457	LOC110022393/LOC110027496/LOC110033647/LOC110037982/LOC110029310/LOC110036633	6
GO:0016311	dephosphorylation	13/474	106/7053	0.0247466	0.33786	0.315801	LOC110029951/LOC110021707/LOC110027413/LOC110029837/LOC110023786/LOC110035093/LOC110024926/LOC110035746/LOC110022915/LOC110037226/LOC110027888/LOC110035791/LOC110037767	13
GO:0006836	neurotransmitter transport	3/474	10/7053	0.0253642	0.33786	0.315801	LOC110022393/LOC110033647/LOC110018571	3
GO:0010271	regulation of chlorophyll catabolic process	3/474	10/7053	0.0253642	0.33786	0.315801	LOC110033451/LOC110028589/LOC110021974	3
GO:0098739	import across plasma membrane	3/474	10/7053	0.0253642	0.33786	0.315801	LOC110022393/LOC110023418/LOC110033647	3
GO:1901404	regulation of tetrapyrrole catabolic process	3/474	10/7053	0.0253642	0.33786	0.315801	LOC110033451/LOC110028589/LOC110021974	3
GO:2000034	regulation of seed maturation	3/474	10/7053	0.0253642	0.33786	0.315801	LOC110025017/LOC110037226/LOC110035791	3
GO:0000160	phosphorelay signal transduction system	8/474	54/7053	0.0265469	0.348173	0.325442	LOC110028166/LOC110037822/LOC110020274/LOC110020162/LOC110022820/LOC110026020/LOC110028362/LOC110035168	8
GO:0031348	negative regulation of defense response	8/474	54/7053	0.0265469	0.348173	0.325442	LOC110039157/LOC110029720/LOC110026801/LOC110036891/LOC110036869/LOC110036855/LOC110032051/LOC110018528	8
GO:0010017	red or far-red light signaling pathway	5/474	26/7053	0.0272452	0.351917	0.328941	LOC110031658/LOC110035489/LOC110018312/LOC110039462/LOC110028262	5
GO:0090056	regulation of chlorophyll metabolic process	5/474	26/7053	0.0272452	0.351917	0.328941	LOC110033451/LOC110028589/LOC110021974/LOC110024270/LOC110028362	5
GO:0016705	oxidoreductase activity, acting on paired donors, with incorporation or reduction of molecular oxygen	14/474	119/7053	0.0279774	0.358657	0.335241	LOC110029507/LOC110030934/LOC110022396/LOC110038145/LOC110024792/LOC110026915/LOC110038911/LOC110018250/LOC110038597/LOC110037394/LOC110023778/LOC110033240/LOC110033260/LOC110021750	14
GO:0009631	cold acclimation	4/474	18/7053	0.0289827	0.361747	0.338129	LOC110029469/LOC110020427/LOC110017809/LOC110032075	4
GO:0009873	ethylene-activated signaling pathway	7/474	45/7053	0.0290671	0.361747	0.338129	LOC110028166/LOC110037822/LOC110020274/LOC110020162/LOC110022820/LOC110026020/LOC110035168	7
GO:0010029	regulation of seed germination	7/474	45/7053	0.0290671	0.361747	0.338129	LOC110028589/LOC110037681/LOC110024270/LOC110037226/LOC110018061/LOC110035791/LOC110038923	7
GO:0031331	positive regulation of cellular catabolic process	7/474	45/7053	0.0290671	0.361747	0.338129	LOC110035598/LOC110036559/LOC110037754/LOC110028464/LOC110036409/LOC110021974/LOC110036362	7
GO:0009644	response to high light intensity	8/474	55/7053	0.0293123	0.362156	0.338511	LOC110022556/LOC110020274/LOC110020162/LOC110022820/LOC110024270/LOC110031670/LOC110020107/LOC110024978	8
GO:0051093	negative regulation of developmental process	13/474	109/7053	0.0303289	0.37202	0.347732	LOC110027028/LOC110024123/LOC110018965/LOC110036650/LOC110021174/LOC110033897/LOC110038561/LOC110038787/LOC110023451/LOC110037226/LOC110018312/LOC110039462/LOC110032051	13
GO:0019684	photosynthesis, light reaction	6/474	36/7053	0.0310531	0.37705	0.352433	LOC110023588/LOC110031670/LOC110020107/LOC110021308/LOC110038717/LOC110021645	6
GO:0042430	indole-containing compound metabolic process	7/474	46/7053	0.0323777	0.37705	0.352433	LOC110035598/LOC110037031/LOC110036559/LOC110022099/LOC110037754/LOC110028464/LOC110036362	7
GO:1900140	regulation of seedling development	7/474	46/7053	0.0323777	0.37705	0.352433	LOC110028589/LOC110037681/LOC110024270/LOC110037226/LOC110018061/LOC110035791/LOC110038923	7
GO:0005516	calmodulin binding	12/474	99/7053	0.0327873	0.37705	0.352433	LOC110024201/LOC110038259/LOC110023763/LOC110024494/LOC110022221/LOC110033994/LOC110022671/LOC110022349/LOC110022335/LOC110035507/LOC110032166/LOC110032075	12
GO:0048528	post-embryonic root development	11/474	88/7053	0.0328493	0.37705	0.352433	LOC110024123/LOC110018965/LOC110021138/LOC110037395/LOC110028286/LOC110019272/LOC110021855/LOC110027595/LOC110027506/LOC110023027/LOC110018528	11
GO:0000186	activation of MAPKK activity	3/474	11/7053	0.0331715	0.37705	0.352433	LOC110020165/LOC110024030/LOC110019100	3
GO:0004709	MAP kinase kinase kinase activity	3/474	11/7053	0.0331715	0.37705	0.352433	LOC110020165/LOC110024030/LOC110019100	3
GO:0006817	phosphate ion transport	3/474	11/7053	0.0331715	0.37705	0.352433	LOC110021539/LOC110025071/LOC110026844	3
GO:0009862	systemic acquired resistance, salicylic acid mediated signaling pathway	3/474	11/7053	0.0331715	0.37705	0.352433	LOC110036650/LOC110029720/LOC110026801	3
GO:0016165	linoleate 13S-lipoxygenase activity	3/474	11/7053	0.0331715	0.37705	0.352433	LOC110022556/LOC110018525/LOC110018528	3
GO:1901682	sulfur compound transmembrane transporter activity	3/474	11/7053	0.0331715	0.37705	0.352433	LOC110021539/LOC110031303/LOC110025071	3
GO:0042737	drug catabolic process	4/474	19/7053	0.0348197	0.388023	0.36269	LOC110021138/LOC110028286/LOC110031047/LOC110033183	4
GO:1900057	positive regulation of leaf senescence	4/474	19/7053	0.0348197	0.388023	0.36269	LOC110020165/LOC110024030/LOC110021974/LOC110019100	4
GO:1905623	positive regulation of leaf development	4/474	19/7053	0.0348197	0.388023	0.36269	LOC110020165/LOC110024030/LOC110021974/LOC110019100	4
GO:0035251	UDP-glucosyltransferase activity	12/474	100/7053	0.0350888	0.388447	0.363086	LOC110027083/LOC110027413/LOC110031195/LOC110031840/LOC110035746/LOC110038174/LOC110024653/LOC110026604/LOC110024656/LOC110029617/LOC110033935/LOC110028987	12
GO:0015291	secondary active transmembrane transporter activity	11/474	89/7053	0.0353134	0.388447	0.363086	LOC110021539/LOC110031303/LOC110027325/LOC110037982/LOC110037738/LOC110029310/LOC110026386/LOC110025071/LOC110036184/LOC110021182/LOC110031086	11
GO:1901401	regulation of tetrapyrrole metabolic process	5/474	28/7053	0.0364802	0.39617	0.370305	LOC110033451/LOC110028589/LOC110021974/LOC110024270/LOC110028362	5
GO:2000070	regulation of response to water deprivation	5/474	28/7053	0.0364802	0.39617	0.370305	LOC110023725/LOC110037900/LOC110023027/LOC110031076/LOC110028013	5
GO:0009743	response to carbohydrate	10/474	79/7053	0.0378392	0.408328	0.381669	LOC110031245/LOC110028589/LOC110026915/LOC110018202/LOC110022349/LOC110022335/LOC110026604/LOC110030179/LOC110027014/LOC110028202	10
GO:0009636	response to toxic substance	16/474	148/7053	0.0394101	0.411672	0.384795	LOC110022599/LOC110034648/LOC110021306/LOC110038259/LOC110035233/LOC110028873/LOC110023763/LOC110024760/LOC110028872/LOC110037681/LOC110031047/LOC110022349/LOC110022335/LOC110023027/LOC110024978/LOC110033183	16
GO:0009896	positive regulation of catabolic process	7/474	48/7053	0.0397331	0.411672	0.384795	LOC110035598/LOC110036559/LOC110037754/LOC110028464/LOC110036409/LOC110021974/LOC110036362	7
GO:0072330	monocarboxylic acid biosynthetic process	12/474	102/7053	0.0400322	0.411672	0.384795	LOC110032486/LOC110034390/LOC110026915/LOC110038911/LOC110037254/LOC110030067/LOC110037188/LOC110017804/LOC110028965/LOC110026975/LOC110036606/LOC110037828	12
GO:0005342	organic acid transmembrane transporter activity	9/474	69/7053	0.0402491	0.411672	0.384795	LOC110022393/LOC110021539/LOC110027496/LOC110033647/LOC110037982/LOC110029310/LOC110025071/LOC110031076/LOC110036633	9
GO:0046943	carboxylic acid transmembrane transporter activity	9/474	69/7053	0.0402491	0.411672	0.384795	LOC110022393/LOC110021539/LOC110027496/LOC110033647/LOC110037982/LOC110029310/LOC110025071/LOC110031076/LOC110036633	9
GO:0005777	peroxisome	11/474	91/7053	0.0406262	0.411672	0.384795	LOC110019083/LOC110024201/LOC110037031/LOC110019473/LOC110035006/LOC110024026/LOC110033746/LOC110020293/LOC110018262/LOC110022005/LOC110033183	11
GO:0042579	microbody	11/474	91/7053	0.0406262	0.411672	0.384795	LOC110019083/LOC110024201/LOC110037031/LOC110019473/LOC110035006/LOC110024026/LOC110033746/LOC110020293/LOC110018262/LOC110022005/LOC110033183	11
GO:0048527	lateral root development	10/474	80/7053	0.0407658	0.411672	0.384795	LOC110024123/LOC110018965/LOC110021138/LOC110037395/LOC110028286/LOC110019272/LOC110021855/LOC110027506/LOC110023027/LOC110018528	10
GO:0009312	oligosaccharide biosynthetic process	4/474	20/7053	0.041288	0.411672	0.384795	LOC110021707/LOC110027413/LOC110029837/LOC110035746	4
GO:0010025	wax biosynthetic process	4/474	20/7053	0.041288	0.411672	0.384795	LOC110025017/LOC110027349/LOC110038911/LOC110026642	4
GO:0010166	wax metabolic process	4/474	20/7053	0.041288	0.411672	0.384795	LOC110025017/LOC110027349/LOC110038911/LOC110026642	4
GO:0018107	peptidyl-threonine phosphorylation	4/474	20/7053	0.041288	0.411672	0.384795	LOC110033924/LOC110035162/LOC110032714/LOC110028468	4
GO:0018210	peptidyl-threonine modification	4/474	20/7053	0.041288	0.411672	0.384795	LOC110033924/LOC110035162/LOC110032714/LOC110028468	4
GO:0016115	terpenoid catabolic process	3/474	12/7053	0.0420755	0.412292	0.385374	LOC110030934/LOC110038145/LOC110021750	3
GO:1901654	response to ketone	3/474	12/7053	0.0420755	0.412292	0.385374	LOC110038259/LOC110023763/LOC110031047	3
GO:2000068	regulation of defense response to insect	3/474	12/7053	0.0420755	0.412292	0.385374	LOC110029484/LOC110018528/LOC110019012	3
GO:0032101	regulation of response to external stimulus	9/474	70/7053	0.0435658	0.414164	0.387124	LOC110018457/LOC110029720/LOC110024419/LOC110026801/LOC110036891/LOC110019453/LOC110023020/LOC110034469/LOC110032051	9
GO:0018105	peptidyl-serine phosphorylation	7/474	49/7053	0.0437885	0.414164	0.387124	LOC110033924/LOC110035162/LOC110024201/LOC110038259/LOC110023763/LOC110024494/LOC110028468	7
GO:0018209	peptidyl-serine modification	7/474	49/7053	0.0437885	0.414164	0.387124	LOC110033924/LOC110035162/LOC110024201/LOC110038259/LOC110023763/LOC110024494/LOC110028468	7
GO:0006631	fatty acid metabolic process	10/474	81/7053	0.0438439	0.414164	0.387124	LOC110032486/LOC110037031/LOC110038911/LOC110037254/LOC110036591/LOC110035006/LOC110037188/LOC110017804/LOC110028965/LOC110037828	10
GO:0009744	response to sucrose	6/474	39/7053	0.043967	0.414164	0.387124	LOC110031245/LOC110028589/LOC110026604/LOC110030179/LOC110027014/LOC110028202	6
GO:0034285	response to disaccharide	6/474	39/7053	0.043967	0.414164	0.387124	LOC110031245/LOC110028589/LOC110026604/LOC110030179/LOC110027014/LOC110028202	6
GO:0071322	cellular response to carbohydrate stimulus	6/474	39/7053	0.043967	0.414164	0.387124	LOC110028589/LOC110026915/LOC110018202/LOC110022349/LOC110022335/LOC110028202	6
GO:0008514	organic anion transmembrane transporter activity	11/474	93/7053	0.0464694	0.435332	0.40691	LOC110022393/LOC110021539/LOC110027496/LOC110033647/LOC110031303/LOC110037982/LOC110037738/LOC110029310/LOC110025071/LOC110031076/LOC110036633	11
GO:1903825	organic acid transmembrane transport	9/474	71/7053	0.0470611	0.436082	0.407612	LOC110022393/LOC110021539/LOC110027496/LOC110033647/LOC110037982/LOC110029310/LOC110025071/LOC110031076/LOC110036633	9
GO:1905039	carboxylic acid transmembrane transport	9/474	71/7053	0.0470611	0.436082	0.407612	LOC110022393/LOC110021539/LOC110027496/LOC110033647/LOC110037982/LOC110029310/LOC110025071/LOC110031076/LOC110036633	9
GO:0001666	response to hypoxia	7/474	50/7053	0.0481016	0.436527	0.408027	LOC110029720/LOC110026801/LOC110029450/LOC110028699/LOC110023449/LOC110026604/LOC110028202	7
GO:0010565	regulation of cellular ketone metabolic process	7/474	50/7053	0.0481016	0.436527	0.408027	LOC110033451/LOC110018457/LOC110023726/LOC110025017/LOC110033898/LOC110021977/LOC110035505	7
GO:2000024	regulation of leaf development	7/474	50/7053	0.0481016	0.436527	0.408027	LOC110020165/LOC110024030/LOC110036650/LOC110021174/LOC110021974/LOC110023451/LOC110019100	7
GO:0050801	ion homeostasis	15/474	140/7053	0.0482123	0.436527	0.408027	LOC110023418/LOC110030337/LOC110027496/LOC110018571/LOC110024760/LOC110030709/LOC110026935/LOC110033897/LOC110033880/LOC110036855/LOC110018061/LOC110021182/LOC110037859/LOC110028392/LOC110032914	15
GO:1901570	fatty acid derivative biosynthetic process	4/474	21/7053	0.0483892	0.436527	0.408027	LOC110025017/LOC110027349/LOC110038911/LOC110026642	4
GO:0051193	obsolete regulation of cofactor metabolic process	6/474	40/7053	0.0489171	0.438967	0.410307	LOC110033451/LOC110028589/LOC110021974/LOC110024270/LOC110027014/LOC110028362	6
GO:0009968	negative regulation of signal transduction	11/474	94/7053	0.0495959	0.442728	0.413823	LOC110037822/LOC110027082/LOC110032336/LOC110031245/LOC110039286/LOC110037226/LOC110028745/LOC110035791/LOC110028202/LOC110028468/LOC110032914	11
GO:0045892	negative regulation of transcription, DNA-templated	16/474	153/7053	0.0508749	0.45178	0.422284	LOC110039248/LOC110024123/LOC110018965/LOC110037822/LOC110036650/LOC110029229/LOC110022840/LOC110021163/LOC110021235/LOC110026290/LOC110025280/LOC110019989/LOC110039462/LOC110023014/LOC110038679/LOC110037061	16
GO:0051289	protein homotetramerization	3/474	13/7053	0.0520456	0.457411	0.427547	LOC110029484/LOC110020662/LOC110019012	3
GO:0072348	sulfur compound transport	3/474	13/7053	0.0520456	0.457411	0.427547	LOC110021539/LOC110031303/LOC110025071	3
GO:0009788	negative regulation of abscisic acid-activated signaling pathway	5/474	31/7053	0.053555	0.460468	0.430405	LOC110032336/LOC110031245/LOC110037226/LOC110035791/LOC110028468	5
GO:1901420	negative regulation of response to alcohol	5/474	31/7053	0.053555	0.460468	0.430405	LOC110032336/LOC110031245/LOC110037226/LOC110035791/LOC110028468	5
GO:1905958	negative regulation of cellular response to alcohol	5/474	31/7053	0.053555	0.460468	0.430405	LOC110032336/LOC110031245/LOC110037226/LOC110035791/LOC110028468	5
GO:0006855	drug transmembrane transport	10/474	84/7053	0.0540139	0.460468	0.430405	LOC110022393/LOC110021539/LOC110033647/LOC110033792/LOC110037738/LOC110034016/LOC110019177/LOC110025071/LOC110036855/LOC110031076	10
GO:0008757	S-adenosylmethionine-dependent methyltransferase activity	10/474	84/7053	0.0540139	0.460468	0.430405	LOC110029507/LOC110021804/LOC110021641/LOC110029040/LOC110034502/LOC110029924/LOC110032624/LOC110039569/LOC110039568/LOC110023518	10
GO:0015893	drug transport	10/474	84/7053	0.0540139	0.460468	0.430405	LOC110022393/LOC110021539/LOC110033647/LOC110033792/LOC110037738/LOC110034016/LOC110019177/LOC110025071/LOC110036855/LOC110031076	10
GO:0009741	response to brassinosteroid	8/474	62/7053	0.0543119	0.460706	0.430627	LOC110024123/LOC110018965/LOC110036163/LOC110027082/LOC110032336/LOC110024792/LOC110026383/LOC110026846	8
GO:0048831	regulation of shoot system development	17/474	167/7053	0.0556889	0.463473	0.433214	LOC110024123/LOC110020165/LOC110018965/LOC110024030/LOC110036650/LOC110037395/LOC110021174/LOC110028589/LOC110033897/LOC110038561/LOC110020906/LOC110038174/LOC110021974/LOC110023451/LOC110018312/LOC110019100/LOC110022005	17
GO:0009962	regulation of flavonoid biosynthetic process	4/474	22/7053	0.0561202	0.463473	0.433214	LOC110029484/LOC110037395/LOC110019471/LOC110019012	4
GO:0008194	UDP-glycosyltransferase activity	15/474	143/7053	0.0561898	0.463473	0.433214	LOC110027083/LOC110026137/LOC110027413/LOC110031195/LOC110022418/LOC110031840/LOC110035746/LOC110038174/LOC110038695/LOC110024653/LOC110026604/LOC110024656/LOC110029617/LOC110033935/LOC110028987	15
GO:0009698	phenylpropanoid metabolic process	11/474	96/7053	0.0562691	0.463473	0.433214	LOC110026381/LOC110038911/LOC110037254/LOC110031047/LOC110031874/LOC110027892/LOC110038424/LOC110024447/LOC110023518/LOC110037994/LOC110031470	11
GO:0010648	negative regulation of cell communication	11/474	96/7053	0.0562691	0.463473	0.433214	LOC110037822/LOC110027082/LOC110032336/LOC110031245/LOC110039286/LOC110037226/LOC110028745/LOC110035791/LOC110028202/LOC110028468/LOC110032914	11
GO:0023057	negative regulation of signaling	11/474	96/7053	0.0562691	0.463473	0.433214	LOC110037822/LOC110027082/LOC110032336/LOC110031245/LOC110039286/LOC110037226/LOC110028745/LOC110035791/LOC110028202/LOC110028468/LOC110032914	11
GO:0009723	response to ethylene	17/474	168/7053	0.058292	0.477826	0.44663	LOC110025017/LOC110028166/LOC110037822/LOC110032336/LOC110020274/LOC110020162/LOC110022840/LOC110021855/LOC110020906/LOC110022820/LOC110019804/LOC110025280/LOC110026020/LOC110038163/LOC110028202/LOC110023014/LOC110035168	17
GO:0042578	phosphoric ester hydrolase activity	13/474	120/7053	0.058611	0.478143	0.446926	LOC110029951/LOC110021707/LOC110027413/LOC110029837/LOC110023786/LOC110035093/LOC110024926/LOC110035746/LOC110022915/LOC110037226/LOC110027888/LOC110035791/LOC110037767	13
GO:0031329	regulation of cellular catabolic process	10/474	86/7053	0.0615961	0.495315	0.462977	LOC110033451/LOC110035598/LOC110036559/LOC110028589/LOC110037754/LOC110028464/LOC110036409/LOC110021974/LOC110036362/LOC110027014	10
GO:0010101	post-embryonic root morphogenesis	7/474	53/7053	0.0626196	0.495315	0.462977	LOC110021138/LOC110037395/LOC110028286/LOC110019272/LOC110021855/LOC110027506/LOC110018528	7
GO:0010102	lateral root morphogenesis	7/474	53/7053	0.0626196	0.495315	0.462977	LOC110021138/LOC110037395/LOC110028286/LOC110019272/LOC110021855/LOC110027506/LOC110018528	7
GO:0016054	organic acid catabolic process	7/474	53/7053	0.0626196	0.495315	0.462977	LOC110030934/LOC110037031/LOC110038145/LOC110031047/LOC110038923/LOC110019341/LOC110021750	7
GO:0046395	carboxylic acid catabolic process	7/474	53/7053	0.0626196	0.495315	0.462977	LOC110030934/LOC110037031/LOC110038145/LOC110031047/LOC110038923/LOC110019341/LOC110021750	7
GO:0048573	photoperiodism, flowering	7/474	53/7053	0.0626196	0.495315	0.462977	LOC110024123/LOC110018965/LOC110024023/LOC110027633/LOC110025280/LOC110028262/LOC110023014	7
GO:0010115	regulation of abscisic acid biosynthetic process	3/474	14/7053	0.0630401	0.495315	0.462977	LOC110033451/LOC110025017/LOC110033898	3
GO:0090447	glycerol-3-phosphate 2-O-acyltransferase activity	3/474	14/7053	0.0630401	0.495315	0.462977	LOC110022915/LOC110027888/LOC110037767	3
GO:0004722	protein serine/threonine phosphatase activity	4/474	23/7053	0.0644735	0.499847	0.467213	LOC110029951/LOC110035093/LOC110037226/LOC110035791	4
GO:1902679	negative regulation of RNA biosynthetic process	16/474	158/7053	0.0644963	0.499847	0.467213	LOC110039248/LOC110024123/LOC110018965/LOC110037822/LOC110036650/LOC110029229/LOC110022840/LOC110021163/LOC110021235/LOC110026290/LOC110025280/LOC110019989/LOC110039462/LOC110023014/LOC110038679/LOC110037061	16
GO:1903507	negative regulation of nucleic acid-templated transcription	16/474	158/7053	0.0644963	0.499847	0.467213	LOC110039248/LOC110024123/LOC110018965/LOC110037822/LOC110036650/LOC110029229/LOC110022840/LOC110021163/LOC110021235/LOC110026290/LOC110025280/LOC110019989/LOC110039462/LOC110023014/LOC110038679/LOC110037061	16
GO:0009735	response to cytokinin	14/474	134/7053	0.065293	0.503731	0.470843	LOC110028166/LOC110034648/LOC110021641/LOC110033792/LOC110035233/LOC110028873/LOC110028589/LOC110019471/LOC110024792/LOC110028872/LOC110018947/LOC110028362/LOC110038923/LOC110035168	14
GO:0022804	active transmembrane transporter activity	19/474	196/7053	0.0670654	0.515075	0.481447	LOC110021539/LOC110033792/LOC110031303/LOC110027325/LOC110037982/LOC110018535/LOC110037738/LOC110029310/LOC110033880/LOC110037192/LOC110026386/LOC110025071/LOC110027026/LOC110025700/LOC110035036/LOC110036184/LOC110021182/LOC110035754/LOC110031086	19
GO:0009739	response to gibberellin	11/474	100/7053	0.0713433	0.545472	0.50986	LOC110018339/LOC110039286/LOC110020906/LOC110021235/LOC110025280/LOC110031047/LOC110038163/LOC110030179/LOC110034609/LOC110023014/LOC110027885	11
GO:0098754	detoxification	7/474	55/7053	0.073633	0.551249	0.515259	LOC110034648/LOC110035233/LOC110028873/LOC110024760/LOC110028872/LOC110023027/LOC110033183	7
GO:0005778	peroxisomal membrane	3/474	15/7053	0.0750087	0.551249	0.515259	LOC110024201/LOC110024026/LOC110033183	3
GO:0007602	phototransduction	3/474	15/7053	0.0750087	0.551249	0.515259	LOC110031658/LOC110035489/LOC110028262	3
GO:0008300	isoprenoid catabolic process	3/474	15/7053	0.0750087	0.551249	0.515259	LOC110030934/LOC110038145/LOC110021750	3
GO:0009585	red, far-red light phototransduction	3/474	15/7053	0.0750087	0.551249	0.515259	LOC110031658/LOC110035489/LOC110028262	3
GO:0009922	fatty acid elongase activity	3/474	15/7053	0.0750087	0.551249	0.515259	LOC110027349/LOC110026642/LOC110028965	3
GO:0031537	regulation of anthocyanin metabolic process	3/474	15/7053	0.0750087	0.551249	0.515259	LOC110037395/LOC110019471/LOC110028362	3
GO:0031903	microbody membrane	3/474	15/7053	0.0750087	0.551249	0.515259	LOC110024201/LOC110024026/LOC110033183	3
GO:1902584	positive regulation of response to water deprivation	3/474	15/7053	0.0750087	0.551249	0.515259	LOC110023725/LOC110037900/LOC110028013	3
GO:0044092	negative regulation of molecular function	11/474	101/7053	0.0754794	0.552327	0.516267	LOC110030781/LOC110037300/LOC110022361/LOC110025508/LOC110033510/LOC110025983/LOC110036869/LOC110025280/LOC110037226/LOC110035791/LOC110023014	11
GO:0060089	molecular transducer activity	15/474	150/7053	0.0782116	0.569875	0.532669	LOC110028691/LOC110030781/LOC110033064/LOC110037395/LOC110028589/LOC110035924/LOC110033564/LOC110028287/LOC110019804/LOC110033880/LOC110019301/LOC110027506/LOC110031903/LOC110021573/LOC110028362	15
GO:0055076	transition metal ion homeostasis	6/474	45/7053	0.0786413	0.570568	0.533317	LOC110024760/LOC110030709/LOC110026935/LOC110033897/LOC110036855/LOC110037859	6
GO:0005984	disaccharide metabolic process	5/474	35/7053	0.0824223	0.589626	0.55113	LOC110021707/LOC110027413/LOC110029837/LOC110035746/LOC110037681	5
GO:0009756	carbohydrate mediated signaling	5/474	35/7053	0.0824223	0.589626	0.55113	LOC110026915/LOC110018202/LOC110022349/LOC110022335/LOC110028202	5
GO:0010182	sugar mediated signaling pathway	5/474	35/7053	0.0824223	0.589626	0.55113	LOC110026915/LOC110018202/LOC110022349/LOC110022335/LOC110028202	5
GO:0038023	signaling receptor activity	14/474	139/7053	0.0829064	0.589626	0.55113	LOC110028691/LOC110030781/LOC110033064/LOC110037395/LOC110028589/LOC110035924/LOC110033564/LOC110028287/LOC110019804/LOC110033880/LOC110019301/LOC110027506/LOC110031903/LOC110021573	14
GO:0051235	maintenance of location	4/474	25/7053	0.0829971	0.589626	0.55113	LOC110039157/LOC110038062/LOC110019177/LOC110028013	4
GO:0036293	response to decreased oxygen levels	7/474	57/7053	0.0857183	0.597052	0.558071	LOC110029720/LOC110026801/LOC110029450/LOC110028699/LOC110023449/LOC110026604/LOC110028202	7
GO:0070482	response to oxygen levels	7/474	57/7053	0.0857183	0.597052	0.558071	LOC110029720/LOC110026801/LOC110029450/LOC110028699/LOC110023449/LOC110026604/LOC110028202	7
GO:0009699	phenylpropanoid biosynthetic process	9/474	80/7053	0.0869241	0.597052	0.558071	LOC110038911/LOC110037254/LOC110031047/LOC110031874/LOC110027892/LOC110024447/LOC110023518/LOC110037994/LOC110031470	9
GO:0015849	organic acid transport	9/474	80/7053	0.0869241	0.597052	0.558071	LOC110022393/LOC110021539/LOC110027496/LOC110033647/LOC110037982/LOC110029310/LOC110025071/LOC110031076/LOC110036633	9
GO:0046942	carboxylic acid transport	9/474	80/7053	0.0869241	0.597052	0.558071	LOC110022393/LOC110021539/LOC110027496/LOC110033647/LOC110037982/LOC110029310/LOC110025071/LOC110031076/LOC110036633	9
GO:0015706	nitrate transport	3/474	16/7053	0.0878944	0.597052	0.558071	LOC110037395/LOC110031303/LOC110021182	3
GO:0016702	oxidoreductase activity, acting on single donors with incorporation of molecular oxygen, incorporation of two atoms of oxygen	3/474	16/7053	0.0878944	0.597052	0.558071	LOC110022556/LOC110018525/LOC110018528	3
GO:0043406	positive regulation of MAP kinase activity	3/474	16/7053	0.0878944	0.597052	0.558071	LOC110020165/LOC110024030/LOC110019100	3
GO:0044438	obsolete microbody part	3/474	16/7053	0.0878944	0.597052	0.558071	LOC110024201/LOC110024026/LOC110033183	3
GO:0044439	obsolete peroxisomal part	3/474	16/7053	0.0878944	0.597052	0.558071	LOC110024201/LOC110024026/LOC110033183	3
GO:0048574	long-day photoperiodism, flowering	3/474	16/7053	0.0878944	0.597052	0.558071	LOC110027633/LOC110025280/LOC110023014	3
GO:0009789	positive regulation of abscisic acid-activated signaling pathway	5/474	36/7053	0.0907077	0.604127	0.564685	LOC110020165/LOC110024030/LOC110026323/LOC110027004/LOC110019100	5
GO:0042537	benzene-containing compound metabolic process	5/474	36/7053	0.0907077	0.604127	0.564685	LOC110034648/LOC110035233/LOC110028873/LOC110028872/LOC110031047	5
GO:1901421	positive regulation of response to alcohol	5/474	36/7053	0.0907077	0.604127	0.564685	LOC110020165/LOC110024030/LOC110026323/LOC110027004/LOC110019100	5
GO:1904680	peptide transmembrane transporter activity	5/474	36/7053	0.0907077	0.604127	0.564685	LOC110018798/LOC110033278/LOC110038103/LOC110028229/LOC110018292	5
GO:1905959	positive regulation of cellular response to alcohol	5/474	36/7053	0.0907077	0.604127	0.564685	LOC110020165/LOC110024030/LOC110026323/LOC110027004/LOC110019100	5
GO:0035673	oligopeptide transmembrane transporter activity	4/474	26/7053	0.0931339	0.617873	0.577533	LOC110018798/LOC110038103/LOC110028229/LOC110018292	4
GO:0080043	quercetin 3-O-glucosyltransferase activity	8/474	70/7053	0.0959429	0.631593	0.590358	LOC110031195/LOC110031840/LOC110038174/LOC110024653/LOC110024656/LOC110029617/LOC110033935/LOC110028987	8
GO:0080044	quercetin 7-O-glucosyltransferase activity	8/474	70/7053	0.0959429	0.631593	0.590358	LOC110031195/LOC110031840/LOC110038174/LOC110024653/LOC110024656/LOC110029617/LOC110033935/LOC110028987	8
GO:0016143	S-glycoside metabolic process	5/474	37/7053	0.0994057	0.641808	0.599906	LOC110029469/LOC110031081/LOC110020427/LOC110027633/LOC110035006	5
GO:0019757	glycosinolate metabolic process	5/474	37/7053	0.0994057	0.641808	0.599906	LOC110029469/LOC110031081/LOC110020427/LOC110027633/LOC110035006	5
GO:0019760	glucosinolate metabolic process	5/474	37/7053	0.0994057	0.641808	0.599906	LOC110029469/LOC110031081/LOC110020427/LOC110027633/LOC110035006	5
GO:0051253	negative regulation of RNA metabolic process	17/474	181/7053	0.0999523	0.641808	0.599906	LOC110039248/LOC110024123/LOC110018965/LOC110037822/LOC110036650/LOC110029229/LOC110022840/LOC110036409/LOC110021163/LOC110021235/LOC110026290/LOC110025280/LOC110019989/LOC110039462/LOC110023014/LOC110038679/LOC110037061	17
GO:0033218	amide binding	6/474	48/7053	0.100434	0.641808	0.599906	LOC110034648/LOC110037395/LOC110035233/LOC110028873/LOC110028872/LOC110027492	6
GO:0015711	organic anion transport	13/474	131/7053	0.100807	0.641808	0.599906	LOC110022393/LOC110021539/LOC110027496/LOC110033647/LOC110036101/LOC110031303/LOC110037982/LOC110037738/LOC110029310/LOC110025071/LOC110031076/LOC110035507/LOC110036633	13
GO:0032787	monocarboxylic acid metabolic process	18/474	194/7053	0.100891	0.641808	0.599906	LOC110032486/LOC110030934/LOC110037031/LOC110034390/LOC110026915/LOC110038911/LOC110037254/LOC110030067/LOC110036591/LOC110034469/LOC110031047/LOC110035006/LOC110037188/LOC110017804/LOC110028965/LOC110026975/LOC110036606/LOC110037828	18
GO:0009583	detection of light stimulus	3/474	17/7053	0.101635	0.641808	0.599906	LOC110031658/LOC110035489/LOC110028262	3
GO:0016701	oxidoreductase activity, acting on single donors with incorporation of molecular oxygen	3/474	17/7053	0.101635	0.641808	0.599906	LOC110022556/LOC110018525/LOC110018528	3
GO:0048571	long-day photoperiodism	3/474	17/7053	0.101635	0.641808	0.599906	LOC110027633/LOC110025280/LOC110023014	3
GO:1902930	regulation of alcohol biosynthetic process	3/474	17/7053	0.101635	0.641808	0.599906	LOC110033451/LOC110025017/LOC110033898	3
GO:0009581	detection of external stimulus	4/474	27/7053	0.103826	0.646073	0.603892	LOC110031658/LOC110035489/LOC110028262/LOC110020089	4
GO:0009582	detection of abiotic stimulus	4/474	27/7053	0.103826	0.646073	0.603892	LOC110031658/LOC110035489/LOC110028262/LOC110020089	4
GO:0035672	oligopeptide transmembrane transport	4/474	27/7053	0.103826	0.646073	0.603892	LOC110018798/LOC110038103/LOC110028229/LOC110018292	4
GO:0051865	protein autoubiquitination	4/474	27/7053	0.103826	0.646073	0.603892	LOC110033223/LOC110027150/LOC110021667/LOC110019484	4
GO:0009648	photoperiodism	7/474	60/7053	0.105833	0.656164	0.613324	LOC110024123/LOC110018965/LOC110024023/LOC110027633/LOC110025280/LOC110028262/LOC110023014	7
GO:0015979	photosynthesis	6/474	49/7053	0.108338	0.665478	0.622031	LOC110023588/LOC110031670/LOC110020107/LOC110021308/LOC110038717/LOC110021645	6
GO:0006820	anion transport	18/474	196/7053	0.108399	0.665478	0.622031	LOC110022393/LOC110021539/LOC110030337/LOC110027496/LOC110033647/LOC110037395/LOC110036101/LOC110031303/LOC110037982/LOC110037738/LOC110029310/LOC110025071/LOC110031076/LOC110035507/LOC110026844/LOC110021182/LOC110036633/LOC110020089	18
GO:0004683	calmodulin-dependent protein kinase activity	5/474	38/7053	0.108506	0.665478	0.622031	LOC110024201/LOC110032714/LOC110038259/LOC110023763/LOC110024494	5
GO:0043900	regulation of multi-organism process	10/474	96/7053	0.109501	0.669174	0.625485	LOC110018457/LOC110029720/LOC110024419/LOC110026801/LOC110036891/LOC110019453/LOC110023020/LOC110034469/LOC110032051/LOC110033183	10
GO:0006857	oligopeptide transport	4/474	28/7053	0.115051	0.687619	0.642726	LOC110018798/LOC110038103/LOC110028229/LOC110018292	4
GO:0010043	response to zinc ion	4/474	28/7053	0.115051	0.687619	0.642726	LOC110027908/LOC110023418/LOC110024760/LOC110033183	4
GO:0010218	response to far red light	4/474	28/7053	0.115051	0.687619	0.642726	LOC110024270/LOC110031670/LOC110021308/LOC110018312	4
GO:0055081	anion homeostasis	4/474	28/7053	0.115051	0.687619	0.642726	LOC110027496/LOC110018061/LOC110028392/LOC110032914	4
GO:1900424	regulation of defense response to bacterium	4/474	28/7053	0.115051	0.687619	0.642726	LOC110018457/LOC110036891/LOC110023020/LOC110032051	4
GO:0009682	induced systemic resistance	3/474	18/7053	0.116166	0.687619	0.642726	LOC110036650/LOC110029720/LOC110026801	3
GO:0016628	oxidoreductase activity, acting on the CH-CH group of donors, NAD or NADP as acceptor	3/474	18/7053	0.116166	0.687619	0.642726	LOC110036445/LOC110018415/LOC110027892	3
GO:0043410	positive regulation of MAPK cascade	3/474	18/7053	0.116166	0.687619	0.642726	LOC110020165/LOC110024030/LOC110019100	3
GO:2000113	negative regulation of cellular macromolecule biosynthetic process	18/474	198/7053	0.116243	0.687619	0.642726	LOC110039248/LOC110024123/LOC110033294/LOC110018965/LOC110037822/LOC110036650/LOC110029229/LOC110022840/LOC110036409/LOC110021163/LOC110021235/LOC110026290/LOC110025280/LOC110019989/LOC110039462/LOC110023014/LOC110038679/LOC110037061	18
GO:0051213	dioxygenase activity	6/474	50/7053	0.116552	0.687619	0.642726	LOC110029507/LOC110022556/LOC110038145/LOC110018525/LOC110018528/LOC110021750	6
GO:0043455	regulation of secondary metabolic process	5/474	39/7053	0.117997	0.693742	0.648449	LOC110033451/LOC110025017/LOC110037395/LOC110033898/LOC110022638	5
GO:0071482	cellular response to light stimulus	7/474	62/7053	0.120533	0.706216	0.660109	LOC110031658/LOC110035489/LOC110024270/LOC110021308/LOC110018312/LOC110039462/LOC110028262	7
GO:0044272	sulfur compound biosynthetic process	6/474	51/7053	0.125069	0.730285	0.682606	LOC110035598/LOC110036559/LOC110037754/LOC110028464/LOC110036362/LOC110035006	6
GO:0030599	pectinesterase activity	4/474	29/7053	0.126781	0.737066	0.688945	LOC110022361/LOC110025508/LOC110033510/LOC110025983	4
GO:0009894	regulation of catabolic process	10/474	99/7053	0.127124	0.737066	0.688945	LOC110033451/LOC110035598/LOC110036559/LOC110028589/LOC110037754/LOC110028464/LOC110036409/LOC110021974/LOC110036362/LOC110027014	10
GO:0010118	stomatal movement	5/474	40/7053	0.127866	0.737066	0.688945	LOC110032336/LOC110023786/LOC110033880/LOC110037226/LOC110032914	5
GO:1901657	glycosyl compound metabolic process	7/474	63/7053	0.128258	0.737066	0.688945	LOC110029469/LOC110031081/LOC110020427/LOC110027633/LOC110035006/LOC110018947/LOC110025063	7
GO:0051240	positive regulation of multicellular organismal process	11/474	112/7053	0.130807	0.737066	0.688945	LOC110020165/LOC110024030/LOC110027082/LOC110037395/LOC110036409/LOC110021974/LOC110024270/LOC110037226/LOC110035791/LOC110038923/LOC110019100	11
GO:0010167	response to nitrate	3/474	19/7053	0.131418	0.737066	0.688945	LOC110022349/LOC110022335/LOC110021182	3
GO:0010223	secondary shoot formation	3/474	19/7053	0.131418	0.737066	0.688945	LOC110034485/LOC110031103/LOC110028362	3
GO:0010346	shoot axis formation	3/474	19/7053	0.131418	0.737066	0.688945	LOC110034485/LOC110031103/LOC110028362	3
GO:0043405	regulation of MAP kinase activity	3/474	19/7053	0.131418	0.737066	0.688945	LOC110020165/LOC110024030/LOC110019100	3
GO:0047262	polygalacturonate 4-alpha-galacturonosyltransferase activity	3/474	19/7053	0.131418	0.737066	0.688945	LOC110026137/LOC110022418/LOC110038695	3
GO:0062013	positive regulation of small molecule metabolic process	3/474	19/7053	0.131418	0.737066	0.688945	LOC110023726/LOC110033898/LOC110021977	3
GO:0071902	positive regulation of protein serine/threonine kinase activity	3/474	19/7053	0.131418	0.737066	0.688945	LOC110020165/LOC110024030/LOC110019100	3
GO:0004888	transmembrane signaling receptor activity	11/474	113/7053	0.136717	0.751161	0.702119	LOC110028691/LOC110033064/LOC110028589/LOC110033564/LOC110028287/LOC110019804/LOC110033880/LOC110019301/LOC110027506/LOC110031903/LOC110021573	11
GO:0042887	amide transmembrane transporter activity	5/474	41/7053	0.138098	0.751161	0.702119	LOC110018798/LOC110033278/LOC110038103/LOC110028229/LOC110018292	5
GO:0009931	calcium-dependent protein serine/threonine kinase activity	4/474	30/7053	0.138989	0.751161	0.702119	LOC110024201/LOC110038259/LOC110023763/LOC110024494	4
GO:0010857	calcium-dependent protein kinase activity	4/474	30/7053	0.138989	0.751161	0.702119	LOC110024201/LOC110038259/LOC110023763/LOC110024494	4
GO:0005811	lipid droplet	2/474	10/7053	0.141861	0.751161	0.702119	LOC110024953/LOC110028013	2
GO:0008649	rRNA methyltransferase activity	2/474	10/7053	0.141861	0.751161	0.702119	LOC110029040/LOC110034502	2
GO:0009835	fruit ripening	2/474	10/7053	0.141861	0.751161	0.702119	LOC110023726/LOC110021977	2
GO:0009963	positive regulation of flavonoid biosynthetic process	2/474	10/7053	0.141861	0.751161	0.702119	LOC110029484/LOC110019012	2
GO:0010496	intercellular transport	2/474	10/7053	0.141861	0.751161	0.702119	LOC110018571/LOC110030866	2
GO:0015691	cadmium ion transport	2/474	10/7053	0.141861	0.751161	0.702119	LOC110024760/LOC110019177	2
GO:0019212	phosphatase inhibitor activity	2/474	10/7053	0.141861	0.751161	0.702119	LOC110030781/LOC110035791	2
GO:0032352	positive regulation of hormone metabolic process	2/474	10/7053	0.141861	0.751161	0.702119	LOC110023726/LOC110021977	2
GO:0042181	ketone biosynthetic process	2/474	10/7053	0.141861	0.751161	0.702119	LOC110020293/LOC110018262	2
GO:0043618	regulation of transcription from RNA polymerase II promoter in response to stress	2/474	10/7053	0.141861	0.751161	0.702119	LOC110029484/LOC110019012	2
GO:0045185	maintenance of protein location	2/474	10/7053	0.141861	0.751161	0.702119	LOC110039157/LOC110038062	2
GO:0051973	positive regulation of telomerase activity	2/474	10/7053	0.141861	0.751161	0.702119	LOC110022349/LOC110022335	2
GO:0140102	catalytic activity, acting on a rRNA	2/474	10/7053	0.141861	0.751161	0.702119	LOC110029040/LOC110034502	2
GO:2000573	positive regulation of DNA biosynthetic process	2/474	10/7053	0.141861	0.751161	0.702119	LOC110022349/LOC110022335	2
GO:2000028	regulation of photoperiodism, flowering	6/474	53/7053	0.142978	0.754729	0.705454	LOC110027028/LOC110038787/LOC110023449/LOC110023451/LOC110018312/LOC110039462	6
GO:0008168	methyltransferase activity	10/474	102/7053	0.14619	0.76588	0.715877	LOC110029507/LOC110021804/LOC110021641/LOC110029040/LOC110034502/LOC110029924/LOC110032624/LOC110039569/LOC110039568/LOC110023518	10
GO:0001763	morphogenesis of a branching structure	3/474	20/7053	0.147324	0.76588	0.715877	LOC110034485/LOC110031103/LOC110028362	3
GO:0009694	jasmonic acid metabolic process	3/474	20/7053	0.147324	0.76588	0.715877	LOC110032486/LOC110034469/LOC110036606	3
GO:0019747	regulation of isoprenoid metabolic process	3/474	20/7053	0.147324	0.76588	0.715877	LOC110033451/LOC110025017/LOC110033898	3
GO:0048046	apoplast	15/474	166/7053	0.147336	0.76588	0.715877	LOC110033145/LOC110036163/LOC110034648/LOC110035233/LOC110035730/LOC110019757/LOC110028873/LOC110028872/LOC110018535/LOC110031103/LOC110035507/LOC110018947/LOC110035275/LOC110032051/LOC110038923	15
GO:0009311	oligosaccharide metabolic process	5/474	42/7053	0.148677	0.767291	0.717196	LOC110021707/LOC110027413/LOC110029837/LOC110035746/LOC110037681	5
GO:0009637	response to blue light	5/474	42/7053	0.148677	0.767291	0.717196	LOC110025018/LOC110024270/LOC110031670/LOC110021308/LOC110018061	5
GO:0051094	positive regulation of developmental process	11/474	115/7053	0.148958	0.767291	0.717196	LOC110020165/LOC110024030/LOC110027082/LOC110037395/LOC110036409/LOC110021974/LOC110024270/LOC110037226/LOC110035791/LOC110038923/LOC110019100	11
GO:0046527	glucosyltransferase activity	12/474	128/7053	0.150782	0.770718	0.720399	LOC110027083/LOC110027413/LOC110031195/LOC110031840/LOC110035746/LOC110038174/LOC110024653/LOC110026604/LOC110024656/LOC110029617/LOC110033935/LOC110028987	12
GO:0055065	metal ion homeostasis	8/474	78/7053	0.151575	0.770718	0.720399	LOC110024760/LOC110030709/LOC110026935/LOC110033897/LOC110033880/LOC110036855/LOC110021182/LOC110037859	8
GO:0004721	phosphoprotein phosphatase activity	4/474	31/7053	0.151646	0.770718	0.720399	LOC110029951/LOC110035093/LOC110037226/LOC110035791	4
GO:0046910	pectinesterase inhibitor activity	4/474	31/7053	0.151646	0.770718	0.720399	LOC110022361/LOC110025508/LOC110033510/LOC110025983	4
GO:0008509	anion transmembrane transporter activity	13/474	141/7053	0.151883	0.770718	0.720399	LOC110022393/LOC110021539/LOC110030337/LOC110027496/LOC110033647/LOC110031303/LOC110037982/LOC110037738/LOC110029310/LOC110025071/LOC110031076/LOC110021182/LOC110036633	13
GO:0010015	root morphogenesis	16/474	181/7053	0.157333	0.790657	0.739036	LOC110026391/LOC110018337/LOC110021138/LOC110037031/LOC110033792/LOC110037395/LOC110028286/LOC110019272/LOC110021855/LOC110026797/LOC110027506/LOC110036855/LOC110031076/LOC110028362/LOC110018528/LOC110026975	16
GO:0006575	cellular modified amino acid metabolic process	5/474	43/7053	0.159588	0.790657	0.739036	LOC110034648/LOC110035233/LOC110028873/LOC110028872/LOC110023027	5
GO:0016036	cellular response to phosphate starvation	5/474	43/7053	0.159588	0.790657	0.739036	LOC110038259/LOC110028589/LOC110023763/LOC110021163/LOC110026844	5
GO:0071407	cellular response to organic cyclic compound	10/474	104/7053	0.159672	0.790657	0.739036	LOC110036650/LOC110029720/LOC110024419/LOC110026801/LOC110021188/LOC110019453/LOC110024792/LOC110034485/LOC110032131/LOC110026841	10
GO:0071478	cellular response to radiation	7/474	67/7053	0.161522	0.790657	0.739036	LOC110031658/LOC110035489/LOC110024270/LOC110021308/LOC110018312/LOC110039462/LOC110028262	7
GO:0048582	positive regulation of post-embryonic development	6/474	55/7053	0.16199	0.790657	0.739036	LOC110027082/LOC110037395/LOC110024270/LOC110037226/LOC110035791/LOC110038923	6
GO:0009610	response to symbiotic fungus	3/474	21/7053	0.163813	0.790657	0.739036	LOC110019804/LOC110019783/LOC110033183	3
GO:0010380	regulation of chlorophyll biosynthetic process	3/474	21/7053	0.163813	0.790657	0.739036	LOC110033451/LOC110024270/LOC110028362	3
GO:0048579	negative regulation of long-day photoperiodism, flowering	3/474	21/7053	0.163813	0.790657	0.739036	LOC110027028/LOC110038787/LOC110039462	3
GO:0051262	protein tetramerization	3/474	21/7053	0.163813	0.790657	0.739036	LOC110029484/LOC110020662/LOC110019012	3
GO:0046890	regulation of lipid biosynthetic process	4/474	32/7053	0.164721	0.790657	0.739036	LOC110033451/LOC110025017/LOC110033898/LOC110035505	4
GO:0010162	seed dormancy process	2/474	11/7053	0.166015	0.790657	0.739036	LOC110037226/LOC110035791	2
GO:0016679	oxidoreductase activity, acting on diphenols and related substances as donors	2/474	11/7053	0.166015	0.790657	0.739036	LOC110020193/LOC110021969	2
GO:0022611	dormancy process	2/474	11/7053	0.166015	0.790657	0.739036	LOC110037226/LOC110035791	2
GO:0035082	axoneme assembly	2/474	11/7053	0.166015	0.790657	0.739036	LOC110017959/LOC110033421	2
GO:0048562	embryonic organ morphogenesis	2/474	11/7053	0.166015	0.790657	0.739036	LOC110036409/LOC110033421	2
GO:0048568	embryonic organ development	2/474	11/7053	0.166015	0.790657	0.739036	LOC110036409/LOC110033421	2
GO:0051176	positive regulation of sulfur metabolic process	2/474	11/7053	0.166015	0.790657	0.739036	LOC110023726/LOC110021977	2
GO:0051972	regulation of telomerase activity	2/474	11/7053	0.166015	0.790657	0.739036	LOC110022349/LOC110022335	2
GO:0071490	cellular response to far red light	2/474	11/7053	0.166015	0.790657	0.739036	LOC110024270/LOC110018312	2
GO:0072659	protein localization to plasma membrane	2/474	11/7053	0.166015	0.790657	0.739036	LOC110039157/LOC110030709	2
GO:1900426	positive regulation of defense response to bacterium	2/474	11/7053	0.166015	0.790657	0.739036	LOC110018457/LOC110023020	2
GO:0004857	enzyme inhibitor activity	7/474	68/7053	0.170395	0.808992	0.756174	LOC110030781/LOC110037300/LOC110022361/LOC110025508/LOC110033510/LOC110025983/LOC110035791	7
GO:0042277	peptide binding	5/474	44/7053	0.170813	0.808992	0.756174	LOC110034648/LOC110037395/LOC110035233/LOC110028873/LOC110028872	5
GO:0045934	negative regulation of nucleobase-containing compound metabolic process	17/474	198/7053	0.176962	0.835789	0.781222	LOC110039248/LOC110024123/LOC110018965/LOC110037822/LOC110036650/LOC110029229/LOC110022840/LOC110036409/LOC110021163/LOC110021235/LOC110026290/LOC110025280/LOC110019989/LOC110039462/LOC110023014/LOC110038679/LOC110037061	17
GO:0006470	protein dephosphorylation	4/474	33/7053	0.178183	0.836295	0.781696	LOC110029951/LOC110035093/LOC110037226/LOC110035791	4
GO:0051703	intraspecies interaction between organisms	4/474	33/7053	0.178183	0.836295	0.781696	LOC110020165/LOC110024030/LOC110032336/LOC110019100	4
GO:0008170	N-methyltransferase activity	3/474	22/7053	0.180817	0.836295	0.781696	LOC110029507/LOC110029040/LOC110034502	3
GO:0008361	regulation of cell size	3/474	22/7053	0.180817	0.836295	0.781696	LOC110021174/LOC110019989/LOC110038679	3
GO:0030176	integral component of endoplasmic reticulum membrane	3/474	22/7053	0.180817	0.836295	0.781696	LOC110023778/LOC110033260/LOC110028965	3
GO:0042762	regulation of sulfur metabolic process	3/474	22/7053	0.180817	0.836295	0.781696	LOC110023726/LOC110021977/LOC110022638	3
GO:1901463	regulation of tetrapyrrole biosynthetic process	3/474	22/7053	0.180817	0.836295	0.781696	LOC110033451/LOC110024270/LOC110028362	3
GO:0016741	transferase activity, transferring one-carbon groups	10/474	107/7053	0.180993	0.836295	0.781696	LOC110029507/LOC110021804/LOC110021641/LOC110029040/LOC110034502/LOC110029924/LOC110032624/LOC110039569/LOC110039568/LOC110023518	10
GO:0055088	lipid homeostasis	5/474	45/7053	0.182335	0.840219	0.785363	LOC110030934/LOC110018571/LOC110018061/LOC110026846/LOC110028392	5
GO:0099568	cytoplasmic region	8/474	82/7053	0.18416	0.846344	0.791088	LOC110020165/LOC110027496/LOC110024030/LOC110032714/LOC110030709/LOC110017959/LOC110033421/LOC110019100	8
GO:0002833	positive regulation of response to biotic stimulus	2/474	12/7053	0.190803	0.849395	0.79394	LOC110018457/LOC110023020	2
GO:0005930	axoneme	2/474	12/7053	0.190803	0.849395	0.79394	LOC110017959/LOC110033421	2
GO:0010359	regulation of anion channel activity	2/474	12/7053	0.190803	0.849395	0.79394	LOC110028691/LOC110037226	2
GO:0015112	nitrate transmembrane transporter activity	2/474	12/7053	0.190803	0.849395	0.79394	LOC110031303/LOC110021182	2
GO:0015140	malate transmembrane transporter activity	2/474	12/7053	0.190803	0.849395	0.79394	LOC110021539/LOC110025071	2
GO:0015743	malate transport	2/474	12/7053	0.190803	0.849395	0.79394	LOC110021539/LOC110025071	2
GO:0019208	phosphatase regulator activity	2/474	12/7053	0.190803	0.849395	0.79394	LOC110030781/LOC110035791	2
GO:0031167	rRNA methylation	2/474	12/7053	0.190803	0.849395	0.79394	LOC110029040/LOC110034502	2
GO:0032838	plasma membrane bounded cell projection cytoplasm	2/474	12/7053	0.190803	0.849395	0.79394	LOC110017959/LOC110033421	2
GO:0043620	regulation of DNA-templated transcription in response to stress	2/474	12/7053	0.190803	0.849395	0.79394	LOC110029484/LOC110019012	2
GO:0071423	malate transmembrane transport	2/474	12/7053	0.190803	0.849395	0.79394	LOC110021539/LOC110025071	2
GO:0097014	ciliary plasm	2/474	12/7053	0.190803	0.849395	0.79394	LOC110017959/LOC110033421	2
GO:0042752	regulation of circadian rhythm	4/474	34/7053	0.192	0.852498	0.796841	LOC110029507/LOC110025280/LOC110024447/LOC110023014	4
GO:0001085	RNA polymerase II transcription factor binding	3/474	23/7053	0.198268	0.871256	0.814373	LOC110033051/LOC110029376/LOC110027045	3
GO:0010143	cutin biosynthetic process	3/474	23/7053	0.198268	0.871256	0.814373	LOC110022915/LOC110027888/LOC110037767	3
GO:0010584	pollen exine formation	3/474	23/7053	0.198268	0.871256	0.814373	LOC110026381/LOC110027892/LOC110038424	3
GO:0044782	cilium organization	3/474	23/7053	0.198268	0.871256	0.814373	LOC110017959/LOC110033421/LOC110025950	3
GO:0031668	cellular response to extracellular stimulus	13/474	149/7053	0.200924	0.880658	0.823162	LOC110034648/LOC110038259/LOC110035233/LOC110028873/LOC110028589/LOC110023763/LOC110024023/LOC110028872/LOC110021163/LOC110019989/LOC110026844/LOC110038679/LOC110022638	13
GO:2000280	regulation of root development	6/474	59/7053	0.202977	0.885607	0.827787	LOC110037395/LOC110029450/LOC110028699/LOC110030866/LOC110028202/LOC110028362	6
GO:0009909	regulation of flower development	9/474	97/7053	0.203092	0.885607	0.827787	LOC110024123/LOC110018965/LOC110028589/LOC110033897/LOC110038561/LOC110020906/LOC110038174/LOC110018312/LOC110022005	9
GO:0009816	defense response to bacterium, incompatible interaction	4/474	35/7053	0.206139	0.889982	0.831877	LOC110022599/LOC110021306/LOC110036135/LOC110027974	4
GO:0009910	negative regulation of flower development	4/474	35/7053	0.206139	0.889982	0.831877	LOC110024123/LOC110018965/LOC110033897/LOC110038561	4
GO:0080050	regulation of seed development	4/474	35/7053	0.206139	0.889982	0.831877	LOC110025017/LOC110037226/LOC110035791/LOC110028362	4
GO:0090696	post-embryonic plant organ development	11/474	124/7053	0.210524	0.889982	0.831877	LOC110024123/LOC110018965/LOC110021138/LOC110037395/LOC110028286/LOC110019272/LOC110021855/LOC110027595/LOC110027506/LOC110023027/LOC110018528	11
GO:0042445	hormone metabolic process	14/474	164/7053	0.211918	0.889982	0.831877	LOC110032486/LOC110023168/LOC110030934/LOC110037031/LOC110038145/LOC110024792/LOC110034485/LOC110030067/LOC110034469/LOC110031047/LOC110028202/LOC110021750/LOC110026846/LOC110036606	14
GO:0015698	inorganic anion transport	6/474	60/7053	0.213771	0.889982	0.831877	LOC110021539/LOC110037395/LOC110031303/LOC110025071/LOC110026844/LOC110021182	6
GO:0009991	response to extracellular stimulus	15/474	178/7053	0.215632	0.889982	0.831877	LOC110034648/LOC110038259/LOC110037395/LOC110035233/LOC110028873/LOC110028589/LOC110023763/LOC110024023/LOC110028872/LOC110021163/LOC110017809/LOC110019989/LOC110026844/LOC110038679/LOC110022638	15
GO:0008156	negative regulation of DNA replication	2/474	13/7053	0.216031	0.889982	0.831877	LOC110019989/LOC110038679	2
GO:0009937	regulation of gibberellic acid mediated signaling pathway	2/474	13/7053	0.216031	0.889982	0.831877	LOC110039286/LOC110037226	2
GO:0010364	regulation of ethylene biosynthetic process	2/474	13/7053	0.216031	0.889982	0.831877	LOC110023726/LOC110021977	2
GO:0030004	cellular monovalent inorganic cation homeostasis	2/474	13/7053	0.216031	0.889982	0.831877	LOC110030337/LOC110033880	2
GO:0030104	water homeostasis	2/474	13/7053	0.216031	0.889982	0.831877	LOC110026915/LOC110031670	2
GO:0031335	regulation of sulfur amino acid metabolic process	2/474	13/7053	0.216031	0.889982	0.831877	LOC110023726/LOC110021977	2
GO:0032875	regulation of DNA endoreduplication	2/474	13/7053	0.216031	0.889982	0.831877	LOC110019989/LOC110038679	2
GO:1900425	negative regulation of defense response to bacterium	2/474	13/7053	0.216031	0.889982	0.831877	LOC110036891/LOC110032051	2
GO:1900908	regulation of olefin metabolic process	2/474	13/7053	0.216031	0.889982	0.831877	LOC110023726/LOC110021977	2
GO:1900911	regulation of olefin biosynthetic process	2/474	13/7053	0.216031	0.889982	0.831877	LOC110023726/LOC110021977	2
GO:1903959	regulation of anion transmembrane transport	2/474	13/7053	0.216031	0.889982	0.831877	LOC110028691/LOC110037226	2
GO:2000104	negative regulation of DNA-dependent DNA replication	2/474	13/7053	0.216031	0.889982	0.831877	LOC110019989/LOC110038679	2
GO:2000278	regulation of DNA biosynthetic process	2/474	13/7053	0.216031	0.889982	0.831877	LOC110022349/LOC110022335	2
GO:0009608	response to symbiont	3/474	24/7053	0.216101	0.889982	0.831877	LOC110019804/LOC110019783/LOC110033183	3
GO:1900150	regulation of defense response to fungus	3/474	24/7053	0.216101	0.889982	0.831877	LOC110024419/LOC110036891/LOC110019453	3
GO:2000031	regulation of salicylic acid mediated signaling pathway	3/474	24/7053	0.216101	0.889982	0.831877	LOC110029720/LOC110026801/LOC110023020	3
GO:0044282	small molecule catabolic process	7/474	73/7053	0.217715	0.892821	0.834531	LOC110030934/LOC110037031/LOC110038145/LOC110031047/LOC110038923/LOC110019341/LOC110021750	7
GO:0016765	transferase activity, transferring alkyl or aryl (other than methyl) groups	5/474	48/7053	0.21849	0.892821	0.834531	LOC110034648/LOC110035233/LOC110028873/LOC110028872/LOC110023027	5
GO:0019199	transmembrane receptor protein kinase activity	9/474	99/7053	0.219811	0.892821	0.834531	LOC110028691/LOC110033064/LOC110033564/LOC110028287/LOC110019804/LOC110019301/LOC110027506/LOC110031903/LOC110021573	9
GO:0006109	regulation of carbohydrate metabolic process	4/474	36/7053	0.220567	0.892821	0.834531	LOC110022840/LOC110032131/LOC110027014/LOC110022638	4
GO:0010311	lateral root formation	4/474	36/7053	0.220567	0.892821	0.834531	LOC110037395/LOC110021855/LOC110027506/LOC110018528	4
GO:0016125	sterol metabolic process	4/474	36/7053	0.220567	0.892821	0.834531	LOC110032486/LOC110030934/LOC110024026/LOC110036606	4
GO:0045488	pectin metabolic process	4/474	36/7053	0.220567	0.892821	0.834531	LOC110021138/LOC110021641/LOC110028286/LOC110035730	4
GO:0098656	anion transmembrane transport	13/474	152/7053	0.22098	0.892821	0.834531	LOC110022393/LOC110021539/LOC110030337/LOC110027496/LOC110033647/LOC110031303/LOC110037982/LOC110037738/LOC110029310/LOC110025071/LOC110031076/LOC110021182/LOC110036633	13
GO:0042542	response to hydrogen peroxide	6/474	61/7053	0.224758	0.905939	0.846793	LOC110022599/LOC110021306/LOC110037681/LOC110022349/LOC110022335/LOC110024978	6
GO:0055080	cation homeostasis	9/474	100/7053	0.228365	0.918307	0.858353	LOC110030337/LOC110024760/LOC110030709/LOC110026935/LOC110033897/LOC110033880/LOC110036855/LOC110021182/LOC110037859	9
GO:0008610	lipid biosynthetic process	16/474	194/7053	0.230973	0.925411	0.864993	LOC110030934/LOC110038145/LOC110023786/LOC110026915/LOC110034485/LOC110038911/LOC110037254/LOC110037394/LOC110024026/LOC110037188/LOC110027014/LOC110033240/LOC110028202/LOC110017804/LOC110028965/LOC110037828	16
GO:0005789	endoplasmic reticulum membrane	11/474	127/7053	0.233147	0.925411	0.864993	LOC110024201/LOC110028589/LOC110023786/LOC110018390/LOC110021075/LOC110024026/LOC110023778/LOC110028202/LOC110033260/LOC110028965/LOC110031118	11
GO:0005929	cilium	3/474	25/7053	0.234252	0.925411	0.864993	LOC110017959/LOC110033421/LOC110025950	3
GO:0006714	sesquiterpenoid metabolic process	3/474	25/7053	0.234252	0.925411	0.864993	LOC110030934/LOC110026915/LOC110034485	3
GO:0043408	regulation of MAPK cascade	3/474	25/7053	0.234252	0.925411	0.864993	LOC110020165/LOC110024030/LOC110019100	3
GO:0071496	cellular response to external stimulus	13/474	154/7053	0.234801	0.925411	0.864993	LOC110034648/LOC110038259/LOC110035233/LOC110028873/LOC110028589/LOC110023763/LOC110024023/LOC110028872/LOC110021163/LOC110019989/LOC110026844/LOC110038679/LOC110022638	13
GO:0010393	galacturonan metabolic process	4/474	37/7053	0.235254	0.925411	0.864993	LOC110021138/LOC110021641/LOC110028286/LOC110035730	4
GO:0043161	proteasome-mediated ubiquitin-dependent protein catabolic process	11/474	128/7053	0.240891	0.925411	0.864993	LOC110020431/LOC110029984/LOC110029447/LOC110019473/LOC110036135/LOC110022349/LOC110022335/LOC110019484/LOC110035505/LOC110027004/LOC110018264	11
GO:0001653	peptide receptor activity	2/474	14/7053	0.24153	0.925411	0.864993	LOC110037395/LOC110035924	2
GO:0002832	negative regulation of response to biotic stimulus	2/474	14/7053	0.24153	0.925411	0.864993	LOC110036891/LOC110032051	2
GO:0006829	zinc ion transport	2/474	14/7053	0.24153	0.925411	0.864993	LOC110023418/LOC110024760	2
GO:0007507	heart development	2/474	14/7053	0.24153	0.925411	0.864993	LOC110036409/LOC110033421	2
GO:0009900	dehiscence	2/474	14/7053	0.24153	0.925411	0.864993	LOC110022556/LOC110035505	2
GO:0010099	regulation of photomorphogenesis	2/474	14/7053	0.24153	0.925411	0.864993	LOC110027082/LOC110028262	2
GO:0030148	sphingolipid biosynthetic process	2/474	14/7053	0.24153	0.925411	0.864993	LOC110023786/LOC110028965	2
GO:0033293	monocarboxylic acid binding	2/474	14/7053	0.24153	0.925411	0.864993	LOC110030781/LOC110027492	2
GO:0042180	cellular ketone metabolic process	2/474	14/7053	0.24153	0.925411	0.864993	LOC110020293/LOC110018262	2
GO:0048439	flower morphogenesis	2/474	14/7053	0.24153	0.925411	0.864993	LOC110026383/LOC110027506	2
GO:0060562	epithelial tube morphogenesis	2/474	14/7053	0.24153	0.925411	0.864993	LOC110036409/LOC110033421	2
GO:0071483	cellular response to blue light	2/474	14/7053	0.24153	0.925411	0.864993	LOC110024270/LOC110021308	2
GO:1990778	protein localization to cell periphery	2/474	14/7053	0.24153	0.925411	0.864993	LOC110039157/LOC110030709	2
GO:0042175	nuclear outer membrane-endoplasmic reticulum membrane network	11/474	129/7053	0.248729	0.95086	0.88878	LOC110024201/LOC110028589/LOC110023786/LOC110018390/LOC110021075/LOC110024026/LOC110023778/LOC110028202/LOC110033260/LOC110028965/LOC110031118	11
GO:0030587	sorocarp development	3/474	26/7053	0.252658	0.955172	0.892811	LOC110020165/LOC110024030/LOC110019100	3
GO:0090702	non-reproductive fruiting body development	3/474	26/7053	0.252658	0.955172	0.892811	LOC110020165/LOC110024030/LOC110019100	3
GO:0099120	socially cooperative development	3/474	26/7053	0.252658	0.955172	0.892811	LOC110020165/LOC110024030/LOC110019100	3
GO:2001023	regulation of response to drug	3/474	26/7053	0.252658	0.955172	0.892811	LOC110029720/LOC110026801/LOC110023020	3
GO:2001038	regulation of cellular response to drug	3/474	26/7053	0.252658	0.955172	0.892811	LOC110029720/LOC110026801/LOC110023020	3
GO:0048767	root hair elongation	5/474	51/7053	0.256621	0.958921	0.896316	LOC110026391/LOC110018337/LOC110037031/LOC110033792/LOC110026797	5
GO:0016114	terpenoid biosynthetic process	7/474	77/7053	0.258568	0.958921	0.896316	LOC110038145/LOC110026915/LOC110034485/LOC110037394/LOC110024026/LOC110033240/LOC110028202	7
GO:0016758	transferase activity, transferring hexosyl groups	16/474	199/7053	0.262654	0.958921	0.896316	LOC110027083/LOC110026391/LOC110026137/LOC110027413/LOC110031195/LOC110022418/LOC110031840/LOC110035746/LOC110038174/LOC110038695/LOC110024653/LOC110026604/LOC110024656/LOC110029617/LOC110033935/LOC110028987	16
GO:0098827	endoplasmic reticulum subcompartment	11/474	131/7053	0.264673	0.958921	0.896316	LOC110024201/LOC110028589/LOC110023786/LOC110018390/LOC110021075/LOC110024026/LOC110023778/LOC110028202/LOC110033260/LOC110028965/LOC110031118	11
GO:0016830	carbon-carbon lyase activity	4/474	39/7053	0.26527	0.958921	0.896316	LOC110022221/LOC110022099/LOC110036591/LOC110025063	4
GO:0047484	regulation of response to osmotic stress	4/474	39/7053	0.26527	0.958921	0.896316	LOC110023725/LOC110037900/LOC110029984/LOC110027004	4
GO:0006482	protein demethylation	2/474	15/7053	0.267148	0.958921	0.896316	LOC110029507/LOC110026383	2
GO:0006521	regulation of cellular amino acid metabolic process	2/474	15/7053	0.267148	0.958921	0.896316	LOC110023726/LOC110021977	2
GO:0008214	protein dealkylation	2/474	15/7053	0.267148	0.958921	0.896316	LOC110029507/LOC110026383	2
GO:0016577	histone demethylation	2/474	15/7053	0.267148	0.958921	0.896316	LOC110029507/LOC110026383	2
GO:0032103	positive regulation of response to external stimulus	2/474	15/7053	0.267148	0.958921	0.896316	LOC110018457/LOC110023020	2
GO:0032452	histone demethylase activity	2/474	15/7053	0.267148	0.958921	0.896316	LOC110029507/LOC110026383	2
GO:0033238	regulation of cellular amine metabolic process	2/474	15/7053	0.267148	0.958921	0.896316	LOC110023726/LOC110021977	2
GO:0042937	tripeptide transmembrane transporter activity	2/474	15/7053	0.267148	0.958921	0.896316	LOC110028229/LOC110018292	2
GO:0042938	dipeptide transport	2/474	15/7053	0.267148	0.958921	0.896316	LOC110028229/LOC110018292	2
GO:0043901	negative regulation of multi-organism process	2/474	15/7053	0.267148	0.958921	0.896316	LOC110036891/LOC110032051	2
GO:0051051	negative regulation of transport	2/474	15/7053	0.267148	0.958921	0.896316	LOC110028589/LOC110037226	2
GO:0051098	regulation of binding	2/474	15/7053	0.267148	0.958921	0.896316	LOC110025280/LOC110023014	2
GO:0051536	iron-sulfur cluster binding	2/474	15/7053	0.267148	0.958921	0.896316	LOC110022897/LOC110018906	2
GO:0051540	metal cluster binding	2/474	15/7053	0.267148	0.958921	0.896316	LOC110022897/LOC110018906	2
GO:0070076	histone lysine demethylation	2/474	15/7053	0.267148	0.958921	0.896316	LOC110029507/LOC110026383	2
GO:1901002	positive regulation of response to salt stress	2/474	15/7053	0.267148	0.958921	0.896316	LOC110023725/LOC110037900	2
GO:1901616	organic hydroxy compound catabolic process	2/474	15/7053	0.267148	0.958921	0.896316	LOC110030934/LOC110031047	2
GO:1903008	organelle disassembly	2/474	15/7053	0.267148	0.958921	0.896316	LOC110025950/LOC110038985	2
GO:0044432	obsolete endoplasmic reticulum part	12/474	145/7053	0.268085	0.960264	0.897571	LOC110024201/LOC110028589/LOC110023786/LOC110018390/LOC110021075/LOC110024026/LOC110028360/LOC110023778/LOC110028202/LOC110033260/LOC110028965/LOC110031118	12
GO:0016874	ligase activity	6/474	65/7053	0.27037	0.965558	0.902519	LOC110026381/LOC110035006/LOC110038424/LOC110038923/LOC110020293/LOC110018262	6
GO:0016645	oxidoreductase activity, acting on the CH-NH group of donors	3/474	27/7053	0.271262	0.965558	0.902519	LOC110019083/LOC110023168/LOC110027806	3
GO:0031227	intrinsic component of endoplasmic reticulum membrane	3/474	27/7053	0.271262	0.965558	0.902519	LOC110023778/LOC110033260/LOC110028965	3
GO:0004675	transmembrane receptor protein serine/threonine kinase activity	8/474	92/7053	0.276562	0.980329	0.916325	LOC110028691/LOC110033064/LOC110033564/LOC110028287/LOC110019804/LOC110019301/LOC110031903/LOC110021573	8
GO:0009642	response to light intensity	8/474	92/7053	0.276562	0.980329	0.916325	LOC110022556/LOC110020274/LOC110020162/LOC110022820/LOC110024270/LOC110031670/LOC110020107/LOC110024978	8
GO:0002237	response to molecule of bacterial origin	4/474	40/7053	0.280537	0.992357	0.927568	LOC110039248/LOC110018457/LOC110029229/LOC110026841	4
GO:0009845	seed germination	5/474	53/7053	0.282877	0.996305	0.931258	LOC110023375/LOC110037395/LOC110035924/LOC110020906/LOC110031377	5
GO:0051347	positive regulation of transferase activity	5/474	53/7053	0.282877	0.996305	0.931258	LOC110020165/LOC110024030/LOC110022349/LOC110022335/LOC110019100	5
GO:0007178	transmembrane receptor protein serine/threonine kinase signaling pathway	8/474	93/7053	0.286463	0.996305	0.931258	LOC110028691/LOC110033064/LOC110033564/LOC110028287/LOC110019804/LOC110019301/LOC110031903/LOC110021573	8
GO:0010345	suberin biosynthetic process	3/474	28/7053	0.290008	0.996305	0.931258	LOC110038911/LOC110037254/LOC110027892	3
GO:2000022	regulation of jasmonic acid mediated signaling pathway	3/474	28/7053	0.290008	0.996305	0.931258	LOC110029720/LOC110026801/LOC110027150	3
GO:0071695	anatomical structure maturation	9/474	107/7053	0.291319	0.996305	0.931258	LOC110026391/LOC110023726/LOC110018337/LOC110037031/LOC110033792/LOC110026797/LOC110021977/LOC110037226/LOC110035791	9
GO:0009695	jasmonic acid biosynthetic process	2/474	16/7053	0.292756	0.996305	0.931258	LOC110032486/LOC110036606	2
GO:0009718	anthocyanin-containing compound biosynthetic process	2/474	16/7053	0.292756	0.996305	0.931258	LOC110029484/LOC110019012	2
GO:0010232	vascular transport	2/474	16/7053	0.292756	0.996305	0.931258	LOC110026935/LOC110031303	2
GO:0010233	phloem transport	2/474	16/7053	0.292756	0.996305	0.931258	LOC110026935/LOC110031303	2
GO:0010431	seed maturation	2/474	16/7053	0.292756	0.996305	0.931258	LOC110037226/LOC110035791	2
GO:0015562	efflux transmembrane transporter activity	2/474	16/7053	0.292756	0.996305	0.931258	LOC110027496/LOC110033792	2
GO:0015914	phospholipid transport	2/474	16/7053	0.292756	0.996305	0.931258	LOC110036101/LOC110035507	2
GO:0044070	regulation of anion transport	2/474	16/7053	0.292756	0.996305	0.931258	LOC110028691/LOC110037226	2
GO:0044426	obsolete cell wall part	2/474	16/7053	0.292756	0.996305	0.931258	LOC110032336/LOC110018571	2
GO:0044462	obsolete external encapsulating structure part	2/474	16/7053	0.292756	0.996305	0.931258	LOC110032336/LOC110018571	2
GO:0051651	maintenance of location in cell	2/474	16/7053	0.292756	0.996305	0.931258	LOC110039157/LOC110038062	2
GO:0055075	potassium ion homeostasis	2/474	16/7053	0.292756	0.996305	0.931258	LOC110033880/LOC110021182	2
GO:0099516	#N/A	2/474	16/7053	0.292756	0.996305	0.931258	LOC110037738/LOC110021182	2
GO:0009640	photomorphogenesis	4/474	41/7053	0.295936	0.999996	0.934709	LOC110027082/LOC110031658/LOC110035489/LOC110023027	4
GO:0008202	steroid metabolic process	5/474	54/7053	0.296196	0.999996	0.934709	LOC110032486/LOC110030934/LOC110024026/LOC110026846/LOC110036606	5
GO:0016616	oxidoreductase activity, acting on the CH-OH group of donors, NAD or NADP as acceptor	5/474	54/7053	0.296196	0.999996	0.934709	LOC110035730/LOC110024026/LOC110031874/LOC110037188/LOC110017804	5
GO:0006721	terpenoid metabolic process	9/474	108/7053	0.300677	0.999996	0.934709	LOC110030934/LOC110038145/LOC110026915/LOC110034485/LOC110037394/LOC110024026/LOC110033240/LOC110028202/LOC110021750	9
GO:0043492	ATPase activity, coupled to movement of substances	9/474	108/7053	0.300677	0.999996	0.934709	LOC110033792/LOC110036101/LOC110018535/LOC110033880/LOC110037192/LOC110027026/LOC110025700/LOC110035036/LOC110035754	9
GO:0098771	inorganic ion homeostasis	9/474	108/7053	0.300677	0.999996	0.934709	LOC110030337/LOC110024760/LOC110030709/LOC110026935/LOC110033897/LOC110033880/LOC110036855/LOC110021182/LOC110037859	9
GO:0010498	proteasomal protein catabolic process	11/474	136/7053	0.305891	0.999996	0.934709	LOC110020431/LOC110029984/LOC110029447/LOC110019473/LOC110036135/LOC110022349/LOC110022335/LOC110019484/LOC110035505/LOC110027004/LOC110018264	11
GO:0007167	enzyme linked receptor protein signaling pathway	8/474	95/7053	0.306525	0.999996	0.934709	LOC110028691/LOC110033064/LOC110033564/LOC110028287/LOC110019804/LOC110019301/LOC110031903/LOC110021573	8
GO:0009736	cytokinin-activated signaling pathway	3/474	29/7053	0.308842	0.999996	0.934709	LOC110028166/LOC110028589/LOC110028362	3
GO:0031098	stress-activated protein kinase signaling cascade	3/474	29/7053	0.308842	0.999996	0.934709	LOC110020165/LOC110024030/LOC110019100	3
GO:0055072	iron ion homeostasis	3/474	29/7053	0.308842	0.999996	0.934709	LOC110030709/LOC110026935/LOC110036855	3
GO:0071368	cellular response to cytokinin stimulus	3/474	29/7053	0.308842	0.999996	0.934709	LOC110028166/LOC110028589/LOC110028362	3
GO:0072329	monocarboxylic acid catabolic process	3/474	29/7053	0.308842	0.999996	0.934709	LOC110030934/LOC110037031/LOC110031047	3
GO:0030003	cellular cation homeostasis	5/474	55/7053	0.309616	0.999996	0.934709	LOC110030337/LOC110026935/LOC110033897/LOC110033880/LOC110037859	5
GO:0019216	regulation of lipid metabolic process	4/474	42/7053	0.311437	0.999996	0.934709	LOC110033451/LOC110025017/LOC110033898/LOC110035505	4
GO:0046983	protein dimerization activity	12/474	151/7053	0.315462	0.999996	0.934709	LOC110023725/LOC110020641/LOC110030781/LOC110033064/LOC110037900/LOC110021855/LOC110039286/LOC110027633/LOC110027506/LOC110032624/LOC110018947/LOC110039569	12
GO:0007267	cell-cell signaling	2/474	17/7053	0.318239	0.999996	0.934709	LOC110036163/LOC110036591	2
GO:0009625	response to insect	2/474	17/7053	0.318239	0.999996	0.934709	LOC110029720/LOC110026801	2
GO:0009960	endosperm development	2/474	17/7053	0.318239	0.999996	0.934709	LOC110037395/LOC110035924	2
GO:0042939	tripeptide transport	2/474	17/7053	0.318239	0.999996	0.934709	LOC110028229/LOC110018292	2
GO:0080022	primary root development	2/474	17/7053	0.318239	0.999996	0.934709	LOC110030179/LOC110028362	2
GO:1902074	response to salt	2/474	17/7053	0.318239	0.999996	0.934709	LOC110033898/LOC110022005	2
GO:0043086	negative regulation of catalytic activity	7/474	83/7053	0.323363	0.999996	0.934709	LOC110030781/LOC110037300/LOC110022361/LOC110025508/LOC110033510/LOC110025983/LOC110035791	7
GO:0006875	cellular metal ion homeostasis	4/474	43/7053	0.327011	0.999996	0.934709	LOC110026935/LOC110033897/LOC110033880/LOC110037859	4
GO:0009734	auxin-activated signaling pathway	4/474	43/7053	0.327011	0.999996	0.934709	LOC110027496/LOC110020906/LOC110022349/LOC110022335	4
GO:0009867	jasmonic acid mediated signaling pathway	4/474	43/7053	0.327011	0.999996	0.934709	LOC110030781/LOC110036650/LOC110021188/LOC110027885	4
GO:0044463	obsolete cell projection part	4/474	43/7053	0.327011	0.999996	0.934709	LOC110030709/LOC110017959/LOC110033421/LOC110033660	4
GO:0120038	obsolete plasma membrane bounded cell projection part	4/474	43/7053	0.327011	0.999996	0.934709	LOC110030709/LOC110017959/LOC110033421/LOC110033660	4
GO:0010208	pollen wall assembly	3/474	30/7053	0.327714	0.999996	0.934709	LOC110026381/LOC110027892/LOC110038424	3
GO:0034440	lipid oxidation	3/474	30/7053	0.327714	0.999996	0.934709	LOC110022556/LOC110036591/LOC110018528	3
GO:0048586	regulation of long-day photoperiodism, flowering	3/474	30/7053	0.327714	0.999996	0.934709	LOC110027028/LOC110038787/LOC110039462	3
GO:0071900	regulation of protein serine/threonine kinase activity	3/474	30/7053	0.327714	0.999996	0.934709	LOC110020165/LOC110024030/LOC110019100	3
GO:0085029	extracellular matrix assembly	3/474	30/7053	0.327714	0.999996	0.934709	LOC110026381/LOC110027892/LOC110038424	3
GO:1901505	carbohydrate derivative transmembrane transporter activity	3/474	30/7053	0.327714	0.999996	0.934709	LOC110031303/LOC110037738/LOC110020599	3
GO:0005938	cell cortex	6/474	70/7053	0.330102	0.999996	0.934709	LOC110020165/LOC110027496/LOC110024030/LOC110032714/LOC110030709/LOC110019100	6
GO:0016747	transferase activity, transferring acyl groups other than amino-acyl groups	10/474	125/7053	0.330576	0.999996	0.934709	LOC110029084/LOC110027349/LOC110026642/LOC110022915/LOC110027888/LOC110019631/LOC110017804/LOC110028965/LOC110037767/LOC110037828	10
GO:1905393	plant organ formation	7/474	84/7053	0.334441	0.999996	0.934709	LOC110037395/LOC110021855/LOC110034485/LOC110027506/LOC110031103/LOC110028362/LOC110018528	7
GO:0006091	generation of precursor metabolites and energy	9/474	112/7053	0.338764	0.999996	0.934709	LOC110027083/LOC110023588/LOC110031670/LOC110020107/LOC110021308/LOC110038717/LOC110021645/LOC110026975/LOC110021969	9
GO:0000041	transition metal ion transport	4/474	44/7053	0.342631	0.999996	0.934709	LOC110023418/LOC110024760/LOC110026935/LOC110019177	4
GO:0010224	response to UV-B	4/474	44/7053	0.342631	0.999996	0.934709	LOC110018457/LOC110031047/LOC110024270/LOC110036023	4
GO:0045926	negative regulation of growth	4/474	44/7053	0.342631	0.999996	0.934709	LOC110036163/LOC110032336/LOC110019989/LOC110038679	4
GO:0006576	cellular biogenic amine metabolic process	2/474	18/7053	0.343498	0.999996	0.934709	LOC110019083/LOC110022099	2
GO:0010252	auxin homeostasis	2/474	18/7053	0.343498	0.999996	0.934709	LOC110019471/LOC110036855	2
GO:0022898	regulation of transmembrane transporter activity	2/474	18/7053	0.343498	0.999996	0.934709	LOC110028691/LOC110037226	2
GO:0032409	regulation of transporter activity	2/474	18/7053	0.343498	0.999996	0.934709	LOC110028691/LOC110037226	2
GO:0032412	regulation of ion transmembrane transporter activity	2/474	18/7053	0.343498	0.999996	0.934709	LOC110028691/LOC110037226	2
GO:0044106	cellular amine metabolic process	2/474	18/7053	0.343498	0.999996	0.934709	LOC110019083/LOC110022099	2
GO:0080027	response to herbivore	2/474	18/7053	0.343498	0.999996	0.934709	LOC110029720/LOC110026801	2
GO:2000012	regulation of auxin polar transport	2/474	18/7053	0.343498	0.999996	0.934709	LOC110018571/LOC110033660	2
GO:0005319	lipid transporter activity	3/474	31/7053	0.346579	0.999996	0.934709	LOC110036101/LOC110031076/LOC110035507	3
GO:0051607	defense response to virus	3/474	31/7053	0.346579	0.999996	0.934709	LOC110025348/LOC110032374/LOC110034304	3
GO:0070417	cellular response to cold	3/474	31/7053	0.346579	0.999996	0.934709	LOC110028589/LOC110023449/LOC110032131	3
GO:0090627	plant epidermal cell differentiation	8/474	99/7053	0.347459	0.999996	0.934709	LOC110026391/LOC110018337/LOC110037031/LOC110033792/LOC110026797/LOC110027506/LOC110035507/LOC110026975	8
GO:0005887	integral component of plasma membrane	10/474	127/7053	0.348736	0.999996	0.934709	LOC110030337/LOC110018798/LOC110027496/LOC110038103/LOC110037982/LOC110029310/LOC110026797/LOC110020662/LOC110031003/LOC110020599	10
GO:0090351	seedling development	5/474	58/7053	0.3503	0.999996	0.934709	LOC110023375/LOC110037395/LOC110035924/LOC110020906/LOC110031377	5
GO:0060560	developmental growth involved in morphogenesis	15/474	198/7053	0.352731	0.999996	0.934709	LOC110021172/LOC110026391/LOC110034009/LOC110018337/LOC110037031/LOC110033792/LOC110019757/LOC110027349/LOC110018292/LOC110026383/LOC110026797/LOC110026642/LOC110028360/LOC110019484/LOC110035507	15
GO:0009814	defense response, incompatible interaction	9/474	114/7053	0.35811	0.999996	0.934709	LOC110022599/LOC110036650/LOC110021306/LOC110029720/LOC110026801/LOC110019804/LOC110032131/LOC110036135/LOC110027974	9
GO:0080147	root hair cell development	5/474	59/7053	0.363941	0.999996	0.934709	LOC110026391/LOC110018337/LOC110037031/LOC110033792/LOC110026797	5
GO:0000165	MAPK cascade	3/474	32/7053	0.365391	0.999996	0.934709	LOC110020165/LOC110024030/LOC110019100	3
GO:0001228	DNA-binding transcription activator activity, RNA polymerase II-specific	3/474	32/7053	0.365391	0.999996	0.934709	LOC110033051/LOC110029376/LOC110027045	3
GO:0001505	regulation of neurotransmitter levels	3/474	32/7053	0.365391	0.999996	0.934709	LOC110022393/LOC110033647/LOC110019783	3
GO:0048506	regulation of timing of meristematic phase transition	3/474	32/7053	0.365391	0.999996	0.934709	LOC110037681/LOC110028202/LOC110027806	3
GO:0048510	regulation of timing of transition from vegetative to reproductive phase	3/474	32/7053	0.365391	0.999996	0.934709	LOC110037681/LOC110028202/LOC110027806	3
GO:0120036	plasma membrane bounded cell projection organization	3/474	32/7053	0.365391	0.999996	0.934709	LOC110017959/LOC110033421/LOC110025950	3
GO:0030001	metal ion transport	11/474	143/7053	0.365969	0.999996	0.934709	LOC110023418/LOC110024760/LOC110026935/LOC110033897/LOC110027325/LOC110026797/LOC110019177/LOC110035519/LOC110021182/LOC110037859/LOC110032636	11
GO:0000154	rRNA modification	2/474	19/7053	0.368448	0.999996	0.934709	LOC110029040/LOC110034502	2
GO:0002009	morphogenesis of an epithelium	2/474	19/7053	0.368448	0.999996	0.934709	LOC110036409/LOC110033421	2
GO:0004252	serine-type endopeptidase activity	2/474	19/7053	0.368448	0.999996	0.934709	LOC110031103/LOC110032051	2
GO:0006665	sphingolipid metabolic process	2/474	19/7053	0.368448	0.999996	0.934709	LOC110023786/LOC110028965	2
GO:0009887	animal organ morphogenesis	2/474	19/7053	0.368448	0.999996	0.934709	LOC110036409/LOC110033421	2
GO:0010227	floral organ abscission	2/474	19/7053	0.368448	0.999996	0.934709	LOC110021138/LOC110028286	2
GO:0010675	regulation of cellular carbohydrate metabolic process	2/474	19/7053	0.368448	0.999996	0.934709	LOC110032131/LOC110022638	2
GO:0032451	demethylase activity	2/474	19/7053	0.368448	0.999996	0.934709	LOC110029507/LOC110026383	2
GO:0043624	cellular protein complex disassembly	2/474	19/7053	0.368448	0.999996	0.934709	LOC110032714/LOC110025950	2
GO:0044441	obsolete ciliary part	2/474	19/7053	0.368448	0.999996	0.934709	LOC110017959/LOC110033421	2
GO:0072359	circulatory system development	2/474	19/7053	0.368448	0.999996	0.934709	LOC110036409/LOC110033421	2
GO:1900376	regulation of secondary metabolite biosynthetic process	2/474	19/7053	0.368448	0.999996	0.934709	LOC110037395/LOC110022638	2
GO:0006511	ubiquitin-dependent protein catabolic process	13/474	172/7053	0.371214	0.999996	0.934709	LOC110020431/LOC110029984/LOC110029447/LOC110019473/LOC110031047/LOC110020209/LOC110036135/LOC110022349/LOC110022335/LOC110019484/LOC110035505/LOC110027004/LOC110018264	13
GO:0016102	diterpenoid biosynthetic process	4/474	46/7053	0.373902	0.999996	0.934709	LOC110038145/LOC110037394/LOC110033240/LOC110028202	4
GO:0019901	protein kinase binding	4/474	46/7053	0.373902	0.999996	0.934709	LOC110033064/LOC110028589/LOC110032711/LOC110037226	4
GO:0048653	anther development	4/474	46/7053	0.373902	0.999996	0.934709	LOC110022556/LOC110039286/LOC110026290/LOC110035505	4
GO:0060627	regulation of vesicle-mediated transport	4/474	46/7053	0.373902	0.999996	0.934709	LOC110018571/LOC110024419/LOC110019453/LOC110029984	4
GO:0042626	ATPase-coupled transmembrane transporter activity	8/474	102/7053	0.378619	0.999996	0.934709	LOC110033792/LOC110018535/LOC110033880/LOC110037192/LOC110027026/LOC110025700/LOC110035036/LOC110035754	8
GO:0048588	developmental cell growth	8/474	102/7053	0.378619	0.999996	0.934709	LOC110026391/LOC110034009/LOC110018337/LOC110037031/LOC110033792/LOC110018292/LOC110026797/LOC110028360	8
GO:0090697	post-embryonic plant organ morphogenesis	7/474	88/7053	0.379183	0.999996	0.934709	LOC110021138/LOC110037395/LOC110028286/LOC110019272/LOC110021855/LOC110027506/LOC110018528	7
GO:0015748	organophosphate ester transport	3/474	33/7053	0.384112	0.999996	0.934709	LOC110036101/LOC110037738/LOC110035507	3
GO:0016627	oxidoreductase activity, acting on the CH-CH group of donors	3/474	33/7053	0.384112	0.999996	0.934709	LOC110036445/LOC110018415/LOC110027892	3
GO:0019005	SCF ubiquitin ligase complex	3/474	33/7053	0.384112	0.999996	0.934709	LOC110019473/LOC110022349/LOC110022335	3
GO:0032147	activation of protein kinase activity	3/474	33/7053	0.384112	0.999996	0.934709	LOC110020165/LOC110024030/LOC110019100	3
GO:1902532	negative regulation of intracellular signal transduction	3/474	33/7053	0.384112	0.999996	0.934709	LOC110037822/LOC110028202/LOC110032914	3
GO:1902533	positive regulation of intracellular signal transduction	3/474	33/7053	0.384112	0.999996	0.934709	LOC110020165/LOC110024030/LOC110019100	3
GO:0016746	transferase activity, transferring acyl groups	10/474	131/7053	0.385467	0.999996	0.934709	LOC110029084/LOC110027349/LOC110026642/LOC110022915/LOC110027888/LOC110019631/LOC110017804/LOC110028965/LOC110037767/LOC110037828	10
GO:0019941	modification-dependent protein catabolic process	13/474	174/7053	0.387215	0.999996	0.934709	LOC110020431/LOC110029984/LOC110029447/LOC110019473/LOC110031047/LOC110020209/LOC110036135/LOC110022349/LOC110022335/LOC110019484/LOC110035505/LOC110027004/LOC110018264	13
GO:0010228	vegetative to reproductive phase transition of meristem	8/474	103/7053	0.389051	0.999996	0.934709	LOC110024123/LOC110018965/LOC110024023/LOC110026383/LOC110027633/LOC110025280/LOC110028262/LOC110023014	8
GO:0001578	microtubule bundle formation	2/474	20/7053	0.393018	0.999996	0.934709	LOC110017959/LOC110033421	2
GO:0032102	negative regulation of response to external stimulus	2/474	20/7053	0.393018	0.999996	0.934709	LOC110036891/LOC110032051	2
GO:0043255	regulation of carbohydrate biosynthetic process	2/474	20/7053	0.393018	0.999996	0.934709	LOC110032131/LOC110022638	2
GO:0048729	tissue morphogenesis	2/474	20/7053	0.393018	0.999996	0.934709	LOC110036409/LOC110033421	2
GO:0060271	cilium assembly	2/474	20/7053	0.393018	0.999996	0.934709	LOC110017959/LOC110033421	2
GO:0007166	cell surface receptor signaling pathway	9/474	118/7053	0.397144	0.999996	0.934709	LOC110028691/LOC110033064/LOC110033564/LOC110024023/LOC110028287/LOC110019804/LOC110019301/LOC110031903/LOC110021573	9
GO:0021700	developmental maturation	9/474	118/7053	0.397144	0.999996	0.934709	LOC110026391/LOC110023726/LOC110018337/LOC110037031/LOC110033792/LOC110026797/LOC110021977/LOC110037226/LOC110035791	9
GO:0008299	isoprenoid biosynthetic process	7/474	90/7053	0.401675	0.999996	0.934709	LOC110038145/LOC110026915/LOC110034485/LOC110037394/LOC110024026/LOC110033240/LOC110028202	7
GO:0009308	amine metabolic process	3/474	34/7053	0.402704	0.999996	0.934709	LOC110019083/LOC110023168/LOC110022099	3
GO:0016706	2-oxoglutarate-dependent dioxygenase activity	3/474	34/7053	0.402704	0.999996	0.934709	LOC110029507/LOC110038145/LOC110021750	3
GO:1901000	regulation of response to salt stress	3/474	34/7053	0.402704	0.999996	0.934709	LOC110023725/LOC110037900/LOC110029984	3
GO:1902531	regulation of intracellular signal transduction	6/474	76/7053	0.403552	0.999996	0.934709	LOC110020165/LOC110037822/LOC110024030/LOC110028202/LOC110019100/LOC110032914	6
GO:0031122	cytoplasmic microtubule organization	4/474	48/7053	0.405049	0.999996	0.934709	LOC110020165/LOC110024030/LOC110025950/LOC110019100	4
GO:0009733	response to auxin	13/474	177/7053	0.411334	0.999996	0.934709	LOC110025017/LOC110032003/LOC110027496/LOC110037031/LOC110033792/LOC110022396/LOC110021855/LOC110020906/LOC110025280/LOC110038163/LOC110022349/LOC110022335/LOC110023014	13
GO:0045087	innate immune response	13/474	177/7053	0.411334	0.999996	0.934709	LOC110022599/LOC110036650/LOC110033064/LOC110021306/LOC110029720/LOC110037395/LOC110026801/LOC110035924/LOC110019804/LOC110032131/LOC110026841/LOC110036135/LOC110027974	13
GO:0042803	protein homodimerization activity	10/474	134/7053	0.413208	0.999996	0.934709	LOC110023725/LOC110020641/LOC110030781/LOC110033064/LOC110037900/LOC110027633/LOC110027506/LOC110032624/LOC110018947/LOC110039569	10
GO:0009838	abscission	2/474	21/7053	0.417145	0.999996	0.934709	LOC110021138/LOC110028286	2
GO:0009850	auxin metabolic process	2/474	21/7053	0.417145	0.999996	0.934709	LOC110037031/LOC110024792	2
GO:0016106	sesquiterpenoid biosynthetic process	2/474	21/7053	0.417145	0.999996	0.934709	LOC110026915/LOC110034485	2
GO:0051053	negative regulation of DNA metabolic process	2/474	21/7053	0.417145	0.999996	0.934709	LOC110019989/LOC110038679	2
GO:0006873	cellular ion homeostasis	5/474	63/7053	0.418449	0.999996	0.934709	LOC110030337/LOC110026935/LOC110033897/LOC110033880/LOC110037859	5
GO:0008134	transcription factor binding	5/474	63/7053	0.418449	0.999996	0.934709	LOC110029484/LOC110033051/LOC110029376/LOC110027045/LOC110019012	5
GO:0071470	cellular response to osmotic stress	3/474	35/7053	0.421132	0.999996	0.934709	LOC110028166/LOC110029984/LOC110021308	3
GO:0006720	isoprenoid metabolic process	9/474	121/7053	0.426525	0.999996	0.934709	LOC110030934/LOC110038145/LOC110026915/LOC110034485/LOC110037394/LOC110024026/LOC110033240/LOC110028202/LOC110021750	9
GO:0009505	plant-type cell wall	12/474	165/7053	0.431699	0.999996	0.934709	LOC110027985/LOC110036163/LOC110037300/LOC110018571/LOC110019757/LOC110025508/LOC110028720/LOC110026007/LOC110033510/LOC110030866/LOC110031103/LOC110035507	12
GO:0015103	inorganic anion transmembrane transporter activity	4/474	50/7053	0.435893	0.999996	0.934709	LOC110021539/LOC110031303/LOC110025071/LOC110021182	4
GO:0008236	serine-type peptidase activity	3/474	36/7053	0.439365	0.999996	0.934709	LOC110020627/LOC110031103/LOC110032051	3
GO:0009627	systemic acquired resistance	3/474	36/7053	0.439365	0.999996	0.934709	LOC110036650/LOC110029720/LOC110026801	3
GO:0017171	serine hydrolase activity	3/474	36/7053	0.439365	0.999996	0.934709	LOC110020627/LOC110031103/LOC110032051	3
GO:0030030	cell projection organization	3/474	36/7053	0.439365	0.999996	0.934709	LOC110017959/LOC110033421/LOC110025950	3
GO:0055067	monovalent inorganic cation homeostasis	3/474	36/7053	0.439365	0.999996	0.934709	LOC110030337/LOC110033880/LOC110021182	3
GO:0032984	protein-containing complex disassembly	2/474	22/7053	0.440777	0.999996	0.934709	LOC110032714/LOC110025950	2
GO:0042562	hormone binding	2/474	22/7053	0.440777	0.999996	0.934709	LOC110030781/LOC110037395	2
GO:0043467	regulation of generation of precursor metabolites and energy	2/474	22/7053	0.440777	0.999996	0.934709	LOC110020107/LOC110027014	2
GO:0043902	positive regulation of multi-organism process	2/474	22/7053	0.440777	0.999996	0.934709	LOC110018457/LOC110023020	2
GO:0080156	mitochondrial mRNA modification	2/474	22/7053	0.440777	0.999996	0.934709	LOC110018202/LOC110022430	2
GO:2000069	regulation of post-embryonic root development	2/474	22/7053	0.440777	0.999996	0.934709	LOC110037395/LOC110028202	2
GO:0043632	modification-dependent macromolecule catabolic process	13/474	182/7053	0.451618	0.999996	0.934709	LOC110020431/LOC110029984/LOC110029447/LOC110019473/LOC110031047/LOC110020209/LOC110036135/LOC110022349/LOC110022335/LOC110019484/LOC110035505/LOC110027004/LOC110018264	13
GO:0045088	regulation of innate immune response	6/474	80/7053	0.452348	0.999996	0.934709	LOC110018457/LOC110036650/LOC110029720/LOC110026801/LOC110032131/LOC110034469	6
GO:0005667	transcription regulator complex	3/474	37/7053	0.457375	0.999996	0.934709	LOC110033051/LOC110029376/LOC110027045	3
GO:0008356	asymmetric cell division	2/474	23/7053	0.463873	0.999996	0.934709	LOC110038062/LOC110027080	2
GO:0015932	nucleobase-containing compound transmembrane transporter activity	2/474	23/7053	0.463873	0.999996	0.934709	LOC110037738/LOC110020599	2
GO:0035239	tube morphogenesis	2/474	23/7053	0.463873	0.999996	0.934709	LOC110036409/LOC110033421	2
GO:0042335	cuticle development	2/474	23/7053	0.463873	0.999996	0.934709	LOC110022840/LOC110035507	2
GO:0046165	alcohol biosynthetic process	2/474	23/7053	0.463873	0.999996	0.934709	LOC110026915/LOC110024926	2
GO:0046283	anthocyanin-containing compound metabolic process	2/474	23/7053	0.463873	0.999996	0.934709	LOC110029484/LOC110019012	2
GO:0052546	cell wall pectin metabolic process	2/474	23/7053	0.463873	0.999996	0.934709	LOC110021641/LOC110035730	2
GO:0015079	potassium ion transmembrane transporter activity	4/474	52/7053	0.466273	0.999996	0.934709	LOC110026797/LOC110035519/LOC110021182/LOC110032636	4
GO:0098657	import into cell	4/474	52/7053	0.466273	0.999996	0.934709	LOC110022393/LOC110023418/LOC110028691/LOC110033647	4
GO:0016101	diterpenoid metabolic process	5/474	67/7053	0.472134	0.999996	0.934709	LOC110038145/LOC110037394/LOC110033240/LOC110028202/LOC110021750	5
GO:0048443	stamen development	5/474	67/7053	0.472134	0.999996	0.934709	LOC110022556/LOC110039286/LOC110026290/LOC110035505/LOC110027885	5
GO:0048466	androecium development	5/474	67/7053	0.472134	0.999996	0.934709	LOC110022556/LOC110039286/LOC110026290/LOC110035505/LOC110027885	5
GO:0051338	regulation of transferase activity	5/474	67/7053	0.472134	0.999996	0.934709	LOC110020165/LOC110024030/LOC110022349/LOC110022335/LOC110019100	5
GO:0006839	mitochondrial transport	3/474	38/7053	0.475136	0.999996	0.934709	LOC110021539/LOC110037738/LOC110025071	3
GO:0031625	ubiquitin protein ligase binding	3/474	38/7053	0.475136	0.999996	0.934709	LOC110019473/LOC110022349/LOC110022335	3
GO:0045860	positive regulation of protein kinase activity	3/474	38/7053	0.475136	0.999996	0.934709	LOC110020165/LOC110024030/LOC110019100	3
GO:0051260	protein homooligomerization	3/474	38/7053	0.475136	0.999996	0.934709	LOC110029484/LOC110020662/LOC110019012	3
GO:0002252	immune effector process	4/474	53/7053	0.481244	0.999996	0.934709	LOC110025348/LOC110032374/LOC110036650/LOC110034304	4
GO:0051186	obsolete cofactor metabolic process	12/474	171/7053	0.48192	0.999996	0.934709	LOC110034648/LOC110035233/LOC110028873/LOC110030709/LOC110028872/LOC110023027/LOC110027892/LOC110020293/LOC110026975/LOC110031118/LOC110018262/LOC110033183	12
GO:0001708	cell fate specification	2/474	24/7053	0.486398	0.999996	0.934709	LOC110038062/LOC110023406	2
GO:0008173	RNA methyltransferase activity	2/474	24/7053	0.486398	0.999996	0.934709	LOC110029040/LOC110034502	2
GO:0009933	meristem structural organization	2/474	24/7053	0.486398	0.999996	0.934709	LOC110021172/LOC110028362	2
GO:0010105	negative regulation of ethylene-activated signaling pathway	2/474	24/7053	0.486398	0.999996	0.934709	LOC110037822/LOC110028202	2
GO:0070298	negative regulation of phosphorelay signal transduction system	2/474	24/7053	0.486398	0.999996	0.934709	LOC110037822/LOC110028202	2
GO:0072593	reactive oxygen species metabolic process	2/474	24/7053	0.486398	0.999996	0.934709	LOC110019783/LOC110033183	2
GO:0090329	regulation of DNA-dependent DNA replication	2/474	24/7053	0.486398	0.999996	0.934709	LOC110019989/LOC110038679	2
GO:0090568	#N/A	2/474	24/7053	0.486398	0.999996	0.934709	LOC110023449/LOC110022638	2
GO:1901136	carbohydrate derivative catabolic process	2/474	24/7053	0.486398	0.999996	0.934709	LOC110025063/LOC110018958	2
GO:1901659	glycosyl compound biosynthetic process	2/474	24/7053	0.486398	0.999996	0.934709	LOC110035006/LOC110018947	2
GO:0009825	multidimensional cell growth	3/474	39/7053	0.492624	0.999996	0.934709	LOC110023726/LOC110022840/LOC110021977	3
GO:0015078	proton transmembrane transporter activity	3/474	39/7053	0.492624	0.999996	0.934709	LOC110031303/LOC110021182/LOC110031086	3
GO:0022411	cellular component disassembly	3/474	39/7053	0.492624	0.999996	0.934709	LOC110032714/LOC110025950/LOC110038985	3
GO:0043269	regulation of ion transport	3/474	39/7053	0.492624	0.999996	0.934709	LOC110028691/LOC110028589/LOC110037226	3
GO:0044389	ubiquitin-like protein ligase binding	3/474	39/7053	0.492624	0.999996	0.934709	LOC110019473/LOC110022349/LOC110022335	3
GO:1901264	carbohydrate derivative transport	3/474	39/7053	0.492624	0.999996	0.934709	LOC110031303/LOC110037738/LOC110020599	3
GO:0015399	primary active transmembrane transporter activity	8/474	113/7053	0.492761	0.999996	0.934709	LOC110033792/LOC110018535/LOC110033880/LOC110037192/LOC110027026/LOC110025700/LOC110035036/LOC110035754	8
GO:0015405	#N/A	8/474	113/7053	0.492761	0.999996	0.934709	LOC110033792/LOC110018535/LOC110033880/LOC110037192/LOC110027026/LOC110025700/LOC110035036/LOC110035754	8
GO:0006813	potassium ion transport	4/474	54/7053	0.496048	0.999996	0.934709	LOC110026797/LOC110035519/LOC110021182/LOC110032636	4
GO:0010008	endosome membrane	4/474	54/7053	0.496048	0.999996	0.934709	LOC110018571/LOC110027506/LOC110036855/LOC110032075	4
GO:0010876	lipid localization	4/474	54/7053	0.496048	0.999996	0.934709	LOC110036101/LOC110031076/LOC110035507/LOC110028013	4
GO:0019900	kinase binding	4/474	54/7053	0.496048	0.999996	0.934709	LOC110033064/LOC110028589/LOC110032711/LOC110037226	4
GO:0034599	cellular response to oxidative stress	4/474	54/7053	0.496048	0.999996	0.934709	LOC110029484/LOC110017809/LOC110019012/LOC110020089	4
GO:0071804	#N/A	4/474	54/7053	0.496048	0.999996	0.934709	LOC110026797/LOC110035519/LOC110021182/LOC110032636	4
GO:0071805	potassium ion transmembrane transport	4/474	54/7053	0.496048	0.999996	0.934709	LOC110026797/LOC110035519/LOC110021182/LOC110032636	4
GO:0016614	oxidoreductase activity, acting on CH-OH group of donors	5/474	69/7053	0.498397	0.999996	0.934709	LOC110035730/LOC110024026/LOC110031874/LOC110037188/LOC110017804	5
GO:0006955	immune response	13/474	188/7053	0.499598	0.999996	0.934709	LOC110022599/LOC110036650/LOC110033064/LOC110021306/LOC110029720/LOC110037395/LOC110026801/LOC110035924/LOC110019804/LOC110032131/LOC110026841/LOC110036135/LOC110027974	13
GO:0000291	nuclear-transcribed mRNA catabolic process, exonucleolytic	1/474	10/7053	0.501506	0.999996	0.934709	LOC110033294	1
GO:0000422	autophagy of mitochondrion	1/474	10/7053	0.501506	0.999996	0.934709	LOC110038985	1
GO:0001676	long-chain fatty acid metabolic process	1/474	10/7053	0.501506	0.999996	0.934709	LOC110032486	1
GO:0004564	beta-fructofuranosidase activity	1/474	10/7053	0.501506	0.999996	0.934709	LOC110037681	1
GO:0006515	protein quality control for misfolded or incompletely synthesized proteins	1/474	10/7053	0.501506	0.999996	0.934709	LOC110019484	1
GO:0008320	protein transmembrane transporter activity	1/474	10/7053	0.501506	0.999996	0.934709	LOC110033278	1
GO:0008333	endosome to lysosome transport	1/474	10/7053	0.501506	0.999996	0.934709	LOC110032914	1
GO:0008519	ammonium transmembrane transporter activity	1/474	10/7053	0.501506	0.999996	0.934709	LOC110018571	1
GO:0009574	preprophase band	1/474	10/7053	0.501506	0.999996	0.934709	LOC110022191	1
GO:0009641	shade avoidance	1/474	10/7053	0.501506	0.999996	0.934709	LOC110027082	1
GO:0009696	salicylic acid metabolic process	1/474	10/7053	0.501506	0.999996	0.934709	LOC110031047	1
GO:0009861	jasmonic acid and ethylene-dependent systemic resistance	1/474	10/7053	0.501506	0.999996	0.934709	LOC110032131	1
GO:0009864	induced systemic resistance, jasmonic acid mediated signaling pathway	1/474	10/7053	0.501506	0.999996	0.934709	LOC110036650	1
GO:0010018	far-red light signaling pathway	1/474	10/7053	0.501506	0.999996	0.934709	LOC110018312	1
GO:0010337	regulation of salicylic acid metabolic process	1/474	10/7053	0.501506	0.999996	0.934709	LOC110018457	1
GO:0010923	negative regulation of phosphatase activity	1/474	10/7053	0.501506	0.999996	0.934709	LOC110030781	1
GO:0016323	basolateral plasma membrane	1/474	10/7053	0.501506	0.999996	0.934709	LOC110030709	1
GO:0019840	isoprenoid binding	1/474	10/7053	0.501506	0.999996	0.934709	LOC110030781	1
GO:0022884	macromolecule transmembrane transporter activity	1/474	10/7053	0.501506	0.999996	0.934709	LOC110033278	1
GO:0030173	integral component of Golgi membrane	1/474	10/7053	0.501506	0.999996	0.934709	LOC110026391	1
GO:0030641	regulation of cellular pH	1/474	10/7053	0.501506	0.999996	0.934709	LOC110030337	1
GO:0031228	intrinsic component of Golgi membrane	1/474	10/7053	0.501506	0.999996	0.934709	LOC110026391	1
GO:0032886	regulation of microtubule-based process	1/474	10/7053	0.501506	0.999996	0.934709	LOC110033421	1
GO:0034062	5'-3' RNA polymerase activity	1/474	10/7053	0.501506	0.999996	0.934709	LOC110037441	1
GO:0035065	regulation of histone acetylation	1/474	10/7053	0.501506	0.999996	0.934709	LOC110026383	1
GO:0035305	negative regulation of dephosphorylation	1/474	10/7053	0.501506	0.999996	0.934709	LOC110030781	1
GO:0036002	pre-mRNA binding	1/474	10/7053	0.501506	0.999996	0.934709	LOC110036409	1
GO:0042455	ribonucleoside biosynthetic process	1/474	10/7053	0.501506	0.999996	0.934709	LOC110018947	1
GO:0044804	autophagy of nucleus	1/474	10/7053	0.501506	0.999996	0.934709	LOC110038985	1
GO:0048534	hematopoietic or lymphoid organ development	1/474	10/7053	0.501506	0.999996	0.934709	LOC110030709	1
GO:0050502	cis-zeatin O-beta-D-glucosyltransferase activity	1/474	10/7053	0.501506	0.999996	0.934709	LOC110028987	1
GO:0051087	chaperone binding	1/474	10/7053	0.501506	0.999996	0.934709	LOC110038884	1
GO:0051194	obsolete positive regulation of cofactor metabolic process	1/474	10/7053	0.501506	0.999996	0.934709	LOC110021974	1
GO:0051453	regulation of intracellular pH	1/474	10/7053	0.501506	0.999996	0.934709	LOC110030337	1
GO:0061726	mitochondrion disassembly	1/474	10/7053	0.501506	0.999996	0.934709	LOC110038985	1
GO:0071941	nitrogen cycle metabolic process	1/474	10/7053	0.501506	0.999996	0.934709	LOC110019783	1
GO:0072488	ammonium transmembrane transport	1/474	10/7053	0.501506	0.999996	0.934709	LOC110018571	1
GO:0080036	regulation of cytokinin-activated signaling pathway	1/474	10/7053	0.501506	0.999996	0.934709	LOC110028362	1
GO:0080052	response to histidine	1/474	10/7053	0.501506	0.999996	0.934709	LOC110028229	1
GO:0080053	response to phenylalanine	1/474	10/7053	0.501506	0.999996	0.934709	LOC110028229	1
GO:0090332	stomatal closure	1/474	10/7053	0.501506	0.999996	0.934709	LOC110023786	1
GO:0097501	stress response to metal ion	1/474	10/7053	0.501506	0.999996	0.934709	LOC110024760	1
GO:0097747	RNA polymerase activity	1/474	10/7053	0.501506	0.999996	0.934709	LOC110037441	1
GO:0099094	ligand-gated cation channel activity	1/474	10/7053	0.501506	0.999996	0.934709	LOC110026797	1
GO:1901983	regulation of protein acetylation	1/474	10/7053	0.501506	0.999996	0.934709	LOC110026383	1
GO:1902936	phosphatidylinositol bisphosphate binding	1/474	10/7053	0.501506	0.999996	0.934709	LOC110038985	1
GO:2000306	positive regulation of photomorphogenesis	1/474	10/7053	0.501506	0.999996	0.934709	LOC110027082	1
GO:2000756	regulation of peptidyl-lysine acetylation	1/474	10/7053	0.501506	0.999996	0.934709	LOC110026383	1
GO:0019439	aromatic compound catabolic process	8/474	114/7053	0.502923	0.999996	0.934709	LOC110033294/LOC110034648/LOC110035233/LOC110028873/LOC110028872/LOC110031047/LOC110026975/LOC110019341	8
GO:0017053	transcription repressor complex	2/474	25/7053	0.508324	0.999996	0.934709	LOC110023449/LOC110022638	2
GO:0046916	cellular transition metal ion homeostasis	2/474	25/7053	0.508324	0.999996	0.934709	LOC110033897/LOC110037859	2
GO:0048826	cotyledon morphogenesis	2/474	25/7053	0.508324	0.999996	0.934709	LOC110030179/LOC110035754	2
GO:0071472	cellular response to salt stress	2/474	25/7053	0.508324	0.999996	0.934709	LOC110028166/LOC110021308	2
GO:0098661	inorganic anion transmembrane transport	2/474	25/7053	0.508324	0.999996	0.934709	LOC110021539/LOC110025071	2
GO:0000959	mitochondrial RNA metabolic process	3/474	40/7053	0.509821	0.999996	0.934709	LOC110037441/LOC110018202/LOC110022430	3
GO:0033674	positive regulation of kinase activity	3/474	40/7053	0.509821	0.999996	0.934709	LOC110020165/LOC110024030/LOC110019100	3
GO:0048598	embryonic morphogenesis	4/474	55/7053	0.51067	0.999996	0.934709	LOC110036409/LOC110033421/LOC110030179/LOC110035754	4
GO:0071365	cellular response to auxin stimulus	4/474	55/7053	0.51067	0.999996	0.934709	LOC110027496/LOC110020906/LOC110022349/LOC110022335	4
GO:0042594	response to starvation	7/474	100/7053	0.512496	0.999996	0.934709	LOC110038259/LOC110037395/LOC110028589/LOC110023763/LOC110021163/LOC110026844/LOC110022638	7
GO:0010016	shoot system morphogenesis	8/474	116/7053	0.523055	0.999996	0.934709	LOC110033830/LOC110026383/LOC110034485/LOC110027506/LOC110031103/LOC110030179/LOC110028362/LOC110035754	8
GO:0015672	monovalent inorganic cation transport	7/474	101/7053	0.523241	0.999996	0.934709	LOC110030709/LOC110031303/LOC110026797/LOC110035519/LOC110021182/LOC110032636/LOC110031086	7
GO:0015077	monovalent inorganic cation transmembrane transporter activity	6/474	86/7053	0.523579	0.999996	0.934709	LOC110031303/LOC110026797/LOC110035519/LOC110021182/LOC110032636/LOC110031086	6
GO:0030198	extracellular matrix organization	3/474	41/7053	0.526706	0.999996	0.934709	LOC110026381/LOC110027892/LOC110038424	3
GO:0043062	extracellular structure organization	3/474	41/7053	0.526706	0.999996	0.934709	LOC110026381/LOC110027892/LOC110038424	3
GO:0043622	cortical microtubule organization	3/474	41/7053	0.526706	0.999996	0.934709	LOC110020165/LOC110024030/LOC110019100	3
GO:0006833	water transport	2/474	26/7053	0.529629	0.999996	0.934709	LOC110039157/LOC110020662	2
GO:0016999	antibiotic metabolic process	2/474	26/7053	0.529629	0.999996	0.934709	LOC110031047/LOC110033183	2
GO:0031965	nuclear membrane	2/474	26/7053	0.529629	0.999996	0.934709	LOC110032088/LOC110032089	2
GO:0042044	fluid transport	2/474	26/7053	0.529629	0.999996	0.934709	LOC110039157/LOC110020662	2
GO:0051054	positive regulation of DNA metabolic process	2/474	26/7053	0.529629	0.999996	0.934709	LOC110022349/LOC110022335	2
GO:0120031	plasma membrane bounded cell projection assembly	2/474	26/7053	0.529629	0.999996	0.934709	LOC110017959/LOC110033421	2
GO:0000156	phosphorelay response regulator activity	1/474	11/7053	0.535055	0.999996	0.934709	LOC110028362	1
GO:0000407	phagophore assembly site	1/474	11/7053	0.535055	0.999996	0.934709	LOC110038985	1
GO:0003680	minor groove of adenine-thymine-rich DNA binding	1/474	11/7053	0.535055	0.999996	0.934709	LOC110026290	1
GO:0004165	dodecenoyl-CoA delta-isomerase activity	1/474	11/7053	0.535055	0.999996	0.934709	LOC110037031	1
GO:0005548	phospholipid transporter activity	1/474	11/7053	0.535055	0.999996	0.934709	LOC110036101	1
GO:0005677	chromatin silencing complex	1/474	11/7053	0.535055	0.999996	0.934709	LOC110023449	1
GO:0005987	sucrose catabolic process	1/474	11/7053	0.535055	0.999996	0.934709	LOC110037681	1
GO:0006220	pyrimidine nucleotide metabolic process	1/474	11/7053	0.535055	0.999996	0.934709	LOC110018947	1
GO:0007006	mitochondrial membrane organization	1/474	11/7053	0.535055	0.999996	0.934709	LOC110037738	1
GO:0007041	lysosomal transport	1/474	11/7053	0.535055	0.999996	0.934709	LOC110032914	1
GO:0008395	steroid hydroxylase activity	1/474	11/7053	0.535055	0.999996	0.934709	LOC110026846	1
GO:0008408	3'-5' exonuclease activity	1/474	11/7053	0.535055	0.999996	0.934709	LOC110033294	1
GO:0009112	nucleobase metabolic process	1/474	11/7053	0.535055	0.999996	0.934709	LOC110018947	1
GO:0009163	nucleoside biosynthetic process	1/474	11/7053	0.535055	0.999996	0.934709	LOC110018947	1
GO:0009309	amine biosynthetic process	1/474	11/7053	0.535055	0.999996	0.934709	LOC110022099	1
GO:0010148	transpiration	1/474	11/7053	0.535055	0.999996	0.934709	LOC110039157	1
GO:0010264	myo-inositol hexakisphosphate biosynthetic process	1/474	11/7053	0.535055	0.999996	0.934709	LOC110024926	1
GO:0015276	ligand-gated ion channel activity	1/474	11/7053	0.535055	0.999996	0.934709	LOC110026797	1
GO:0016144	S-glycoside biosynthetic process	1/474	11/7053	0.535055	0.999996	0.934709	LOC110035006	1
GO:0016278	lysine N-methyltransferase activity	1/474	11/7053	0.535055	0.999996	0.934709	LOC110029507	1
GO:0016279	protein-lysine N-methyltransferase activity	1/474	11/7053	0.535055	0.999996	0.934709	LOC110029507	1
GO:0018202	peptidyl-histidine modification	1/474	11/7053	0.535055	0.999996	0.934709	LOC110028589	1
GO:0019758	glycosinolate biosynthetic process	1/474	11/7053	0.535055	0.999996	0.934709	LOC110035006	1
GO:0019761	glucosinolate biosynthetic process	1/474	11/7053	0.535055	0.999996	0.934709	LOC110035006	1
GO:0019888	protein phosphatase regulator activity	1/474	11/7053	0.535055	0.999996	0.934709	LOC110030781	1
GO:0022406	membrane docking	1/474	11/7053	0.535055	0.999996	0.934709	LOC110039157	1
GO:0022834	ligand-gated channel activity	1/474	11/7053	0.535055	0.999996	0.934709	LOC110026797	1
GO:0031201	SNARE complex	1/474	11/7053	0.535055	0.999996	0.934709	LOC110039157	1
GO:0032958	inositol phosphate biosynthetic process	1/474	11/7053	0.535055	0.999996	0.934709	LOC110024926	1
GO:0033517	myo-inositol hexakisphosphate metabolic process	1/474	11/7053	0.535055	0.999996	0.934709	LOC110024926	1
GO:0033865	nucleoside bisphosphate metabolic process	1/474	11/7053	0.535055	0.999996	0.934709	LOC110027892	1
GO:0033875	ribonucleoside bisphosphate metabolic process	1/474	11/7053	0.535055	0.999996	0.934709	LOC110027892	1
GO:0034032	purine nucleoside bisphosphate metabolic process	1/474	11/7053	0.535055	0.999996	0.934709	LOC110027892	1
GO:0035304	regulation of protein dephosphorylation	1/474	11/7053	0.535055	0.999996	0.934709	LOC110030781	1
GO:0042401	cellular biogenic amine biosynthetic process	1/474	11/7053	0.535055	0.999996	0.934709	LOC110022099	1
GO:0043666	regulation of phosphoprotein phosphatase activity	1/474	11/7053	0.535055	0.999996	0.934709	LOC110030781	1
GO:0046164	alcohol catabolic process	1/474	11/7053	0.535055	0.999996	0.934709	LOC110030934	1
GO:0046864	isoprenoid transport	1/474	11/7053	0.535055	0.999996	0.934709	LOC110031076	1
GO:0046865	terpenoid transport	1/474	11/7053	0.535055	0.999996	0.934709	LOC110031076	1
GO:0048255	mRNA stabilization	1/474	11/7053	0.535055	0.999996	0.934709	LOC110036409	1
GO:0048278	vesicle docking	1/474	11/7053	0.535055	0.999996	0.934709	LOC110039157	1
GO:0051788	response to misfolded protein	1/474	11/7053	0.535055	0.999996	0.934709	LOC110019484	1
GO:0052482	defense response by cell wall thickening	1/474	11/7053	0.535055	0.999996	0.934709	LOC110028691	1
GO:0052544	defense response by callose deposition in cell wall	1/474	11/7053	0.535055	0.999996	0.934709	LOC110028691	1
GO:0060090	molecular adaptor activity	1/474	11/7053	0.535055	0.999996	0.934709	LOC110030709	1
GO:0062014	negative regulation of small molecule metabolic process	1/474	11/7053	0.535055	0.999996	0.934709	LOC110033451	1
GO:0071218	cellular response to misfolded protein	1/474	11/7053	0.535055	0.999996	0.934709	LOC110019484	1
GO:0080168	abscisic acid transport	1/474	11/7053	0.535055	0.999996	0.934709	LOC110031076	1
GO:0140056	organelle localization by membrane tethering	1/474	11/7053	0.535055	0.999996	0.934709	LOC110039157	1
GO:1901141	regulation of lignin biosynthetic process	1/474	11/7053	0.535055	0.999996	0.934709	LOC110037395	1
GO:1902373	negative regulation of mRNA catabolic process	1/474	11/7053	0.535055	0.999996	0.934709	LOC110036409	1
GO:2001057	reactive nitrogen species metabolic process	1/474	11/7053	0.535055	0.999996	0.934709	LOC110019783	1
GO:0009267	cellular response to starvation	6/474	87/7053	0.535107	0.999996	0.934709	LOC110038259/LOC110028589/LOC110023763/LOC110021163/LOC110026844/LOC110022638	6
GO:0044242	cellular lipid catabolic process	4/474	57/7053	0.539317	0.999996	0.934709	LOC110030934/LOC110037031/LOC110038145/LOC110021750	4
GO:0005769	early endosome	3/474	42/7053	0.543265	0.999996	0.934709	LOC110018571/LOC110029984/LOC110032914	3
GO:0010053	root epidermal cell differentiation	6/474	88/7053	0.546516	0.999996	0.934709	LOC110026391/LOC110018337/LOC110037031/LOC110033792/LOC110026797/LOC110026975	6
GO:0010087	phloem or xylem histogenesis	5/474	73/7053	0.549317	0.999996	0.934709	LOC110018571/LOC110020274/LOC110028589/LOC110020162/LOC110022820	5
GO:0006275	regulation of DNA replication	2/474	27/7053	0.550299	0.999996	0.934709	LOC110019989/LOC110038679	2
GO:0009072	aromatic amino acid family metabolic process	2/474	27/7053	0.550299	0.999996	0.934709	LOC110022099/LOC110019341	2
GO:0010104	regulation of ethylene-activated signaling pathway	2/474	27/7053	0.550299	0.999996	0.934709	LOC110037822/LOC110028202	2
GO:0019932	second-messenger-mediated signaling	2/474	27/7053	0.550299	0.999996	0.934709	LOC110036163/LOC110021235	2
GO:0031056	regulation of histone modification	2/474	27/7053	0.550299	0.999996	0.934709	LOC110023449/LOC110026383	2
GO:0034765	regulation of ion transmembrane transport	2/474	27/7053	0.550299	0.999996	0.934709	LOC110028691/LOC110037226	2
GO:0035295	tube development	2/474	27/7053	0.550299	0.999996	0.934709	LOC110036409/LOC110033421	2
GO:0070297	regulation of phosphorelay signal transduction system	2/474	27/7053	0.550299	0.999996	0.934709	LOC110037822/LOC110028202	2
GO:0031225	anchored component of membrane	8/474	119/7053	0.552695	0.999996	0.934709	LOC110025348/LOC110032374/LOC110028048/LOC110019757/LOC110034304/LOC110030612/LOC110039058/LOC110023451	8
GO:0042446	hormone biosynthetic process	8/474	119/7053	0.552695	0.999996	0.934709	LOC110032486/LOC110030934/LOC110038145/LOC110024792/LOC110034485/LOC110030067/LOC110028202/LOC110036606	8
GO:0006733	obsolete oxidoreduction coenzyme metabolic process	3/474	43/7053	0.559484	0.999996	0.934709	LOC110020293/LOC110026975/LOC110018262	3
GO:0009685	gibberellin metabolic process	3/474	43/7053	0.559484	0.999996	0.934709	LOC110038145/LOC110028202/LOC110021750	3
GO:0042538	hyperosmotic salinity response	3/474	43/7053	0.559484	0.999996	0.934709	LOC110029484/LOC110028229/LOC110019012	3
GO:1902600	proton transmembrane transport	3/474	43/7053	0.559484	0.999996	0.934709	LOC110031303/LOC110021182/LOC110031086	3
GO:0001558	regulation of cell growth	5/474	74/7053	0.561658	0.999996	0.934709	LOC110036163/LOC110032336/LOC110018571/LOC110019989/LOC110038679	5
GO:1901361	organic cyclic compound catabolic process	8/474	120/7053	0.562406	0.999996	0.934709	LOC110033294/LOC110034648/LOC110035233/LOC110028873/LOC110028872/LOC110031047/LOC110026975/LOC110019341	8
GO:0046658	anchored component of plasma membrane	7/474	105/7053	0.565276	0.999996	0.934709	LOC110025348/LOC110032374/LOC110028048/LOC110019757/LOC110034304/LOC110030612/LOC110039058	7
GO:0000304	response to singlet oxygen	1/474	12/7053	0.56635	0.999996	0.934709	LOC110017809	1
GO:0004176	ATP-dependent peptidase activity	1/474	12/7053	0.56635	0.999996	0.934709	LOC110020107	1
GO:0005826	actomyosin contractile ring	1/474	12/7053	0.56635	0.999996	0.934709	LOC110032714	1
GO:0009543	chloroplast thylakoid lumen	1/474	12/7053	0.56635	0.999996	0.934709	LOC110027562	1
GO:0009956	radial pattern formation	1/474	12/7053	0.56635	0.999996	0.934709	LOC110038062	1
GO:0016108	tetraterpenoid metabolic process	1/474	12/7053	0.56635	0.999996	0.934709	LOC110026915	1
GO:0016116	carotenoid metabolic process	1/474	12/7053	0.56635	0.999996	0.934709	LOC110026915	1
GO:0016863	intramolecular oxidoreductase activity, transposing C=C bonds	1/474	12/7053	0.56635	0.999996	0.934709	LOC110037031	1
GO:0031033	myosin filament organization	1/474	12/7053	0.56635	0.999996	0.934709	LOC110032714	1
GO:0031109	microtubule polymerization or depolymerization	1/474	12/7053	0.56635	0.999996	0.934709	LOC110025950	1
GO:0031978	plastid thylakoid lumen	1/474	12/7053	0.56635	0.999996	0.934709	LOC110027562	1
GO:0032266	phosphatidylinositol-3-phosphate binding	1/474	12/7053	0.56635	0.999996	0.934709	LOC110038985	1
GO:0035838	growing cell tip	1/474	12/7053	0.56635	0.999996	0.934709	LOC110033660	1
GO:0043201	response to leucine	1/474	12/7053	0.56635	0.999996	0.934709	LOC110028229	1
GO:0043424	protein histidine kinase binding	1/474	12/7053	0.56635	0.999996	0.934709	LOC110028589	1
GO:0044456	obsolete synapse part	1/474	12/7053	0.56635	0.999996	0.934709	LOC110030709	1
GO:0046889	positive regulation of lipid biosynthetic process	1/474	12/7053	0.56635	0.999996	0.934709	LOC110033898	1
GO:0051569	regulation of histone H3-K4 methylation	1/474	12/7053	0.56635	0.999996	0.934709	LOC110023449	1
GO:0051571	positive regulation of histone H3-K4 methylation	1/474	12/7053	0.56635	0.999996	0.934709	LOC110023449	1
GO:0070938	contractile ring	1/474	12/7053	0.56635	0.999996	0.934709	LOC110032714	1
GO:0080026	response to indolebutyric acid	1/474	12/7053	0.56635	0.999996	0.934709	LOC110037031	1
GO:1905156	negative regulation of photosynthesis	1/474	12/7053	0.56635	0.999996	0.934709	LOC110020107	1
GO:0090698	post-embryonic plant morphogenesis	10/474	151/7053	0.566886	0.999996	0.934709	LOC110021138/LOC110037395/LOC110028286/LOC110019272/LOC110021855/LOC110026383/LOC110027506/LOC110030179/LOC110018528/LOC110035754	10
GO:0071395	cellular response to jasmonic acid stimulus	4/474	59/7053	0.567091	0.999996	0.934709	LOC110030781/LOC110036650/LOC110021188/LOC110027885	4
GO:0031400	negative regulation of protein modification process	2/474	28/7053	0.570321	0.999996	0.934709	LOC110030781/LOC110026383	2
GO:0034762	regulation of transmembrane transport	2/474	28/7053	0.570321	0.999996	0.934709	LOC110028691/LOC110037226	2
GO:1900864	mitochondrial RNA modification	2/474	28/7053	0.570321	0.999996	0.934709	LOC110018202/LOC110022430	2
GO:0009535	chloroplast thylakoid membrane	8/474	121/7053	0.572026	0.999996	0.934709	LOC110032486/LOC110023588/LOC110024270/LOC110031670/LOC110018947/LOC110038717/LOC110021645/LOC110036606	8
GO:0000977	RNA polymerase II transcription regulatory region sequence-specific DNA binding	3/474	44/7053	0.575352	0.999996	0.934709	LOC110033051/LOC110029376/LOC110027045	3
GO:0001012	#N/A	3/474	44/7053	0.575352	0.999996	0.934709	LOC110033051/LOC110029376/LOC110027045	3
GO:0005770	late endosome	3/474	44/7053	0.575352	0.999996	0.934709	LOC110027506/LOC110036855/LOC110031076	3
GO:0006066	alcohol metabolic process	3/474	44/7053	0.575352	0.999996	0.934709	LOC110030934/LOC110026915/LOC110024926	3
GO:0009615	response to virus	3/474	44/7053	0.575352	0.999996	0.934709	LOC110025348/LOC110032374/LOC110034304	3
GO:0010927	cellular component assembly involved in morphogenesis	3/474	44/7053	0.575352	0.999996	0.934709	LOC110026381/LOC110027892/LOC110038424	3
GO:0008324	cation transmembrane transporter activity	12/474	183/7053	0.579015	0.999996	0.934709	LOC110022393/LOC110023418/LOC110033647/LOC110018571/LOC110026935/LOC110031303/LOC110027325/LOC110026797/LOC110035519/LOC110021182/LOC110032636/LOC110031086	12
GO:0016042	lipid catabolic process	4/474	60/7053	0.580627	0.999996	0.934709	LOC110030934/LOC110037031/LOC110038145/LOC110021750	4
GO:0009534	chloroplast thylakoid	11/474	168/7053	0.581305	0.999996	0.934709	LOC110022556/LOC110032486/LOC110027562/LOC110023588/LOC110024270/LOC110031670/LOC110035507/LOC110018947/LOC110038717/LOC110021645/LOC110036606	11
GO:0055082	cellular chemical homeostasis	5/474	76/7053	0.585819	0.999996	0.934709	LOC110030337/LOC110026935/LOC110033897/LOC110033880/LOC110037859	5
GO:0031976	plastid thylakoid	11/474	169/7053	0.589385	0.999996	0.934709	LOC110022556/LOC110032486/LOC110027562/LOC110023588/LOC110024270/LOC110031670/LOC110035507/LOC110018947/LOC110038717/LOC110021645/LOC110036606	11
GO:0001510	RNA methylation	2/474	29/7053	0.58969	0.999996	0.934709	LOC110029040/LOC110034502	2
GO:0015295	solute:proton symporter activity	2/474	29/7053	0.58969	0.999996	0.934709	LOC110031303/LOC110031086	2
GO:0070988	demethylation	2/474	29/7053	0.58969	0.999996	0.934709	LOC110029507/LOC110026383	2
GO:0009826	unidimensional cell growth	10/474	154/7053	0.592419	0.999996	0.934709	LOC110021172/LOC110034009/LOC110019757/LOC110027349/LOC110018292/LOC110026383/LOC110026642/LOC110028360/LOC110019484/LOC110035507	10
GO:0044436	obsolete thylakoid part	10/474	154/7053	0.592419	0.999996	0.934709	LOC110032486/LOC110027562/LOC110024830/LOC110023588/LOC110024270/LOC110031670/LOC110018947/LOC110038717/LOC110021645/LOC110036606	10
GO:0098772	molecular function regulator	10/474	154/7053	0.592419	0.999996	0.934709	LOC110036163/LOC110030781/LOC110037300/LOC110022361/LOC110025508/LOC110033510/LOC110027595/LOC110025983/LOC110035791/LOC110038884	10
GO:0005089	Rho guanyl-nucleotide exchange factor activity	1/474	13/7053	0.595544	0.999996	0.934709	LOC110027595	1
GO:0005200	structural constituent of cytoskeleton	1/474	13/7053	0.595544	0.999996	0.934709	LOC110030709	1
GO:0005262	calcium channel activity	1/474	13/7053	0.595544	0.999996	0.934709	LOC110027325	1
GO:0005385	zinc ion transmembrane transporter activity	1/474	13/7053	0.595544	0.999996	0.934709	LOC110023418	1
GO:0005788	endoplasmic reticulum lumen	1/474	13/7053	0.595544	0.999996	0.934709	LOC110028360	1
GO:0005977	glycogen metabolic process	1/474	13/7053	0.595544	0.999996	0.934709	LOC110027083	1
GO:0006112	energy reserve metabolic process	1/474	13/7053	0.595544	0.999996	0.934709	LOC110027083	1
GO:0006497	protein lipidation	1/474	13/7053	0.595544	0.999996	0.934709	LOC110038985	1
GO:0006612	protein targeting to membrane	1/474	13/7053	0.595544	0.999996	0.934709	LOC110039157	1
GO:0006862	nucleotide transport	1/474	13/7053	0.595544	0.999996	0.934709	LOC110037738	1
GO:0009638	phototropism	1/474	13/7053	0.595544	0.999996	0.934709	LOC110025018	1
GO:0010082	regulation of root meristem growth	1/474	13/7053	0.595544	0.999996	0.934709	LOC110028362	1
GO:0010329	auxin efflux transmembrane transporter activity	1/474	13/7053	0.595544	0.999996	0.934709	LOC110033792	1
GO:0015605	organophosphate ester transmembrane transporter activity	1/474	13/7053	0.595544	0.999996	0.934709	LOC110037738	1
GO:0015865	purine nucleotide transport	1/474	13/7053	0.595544	0.999996	0.934709	LOC110037738	1
GO:0015866	ADP transport	1/474	13/7053	0.595544	0.999996	0.934709	LOC110037738	1
GO:0015868	purine ribonucleotide transport	1/474	13/7053	0.595544	0.999996	0.934709	LOC110037738	1
GO:0016032	viral process	1/474	13/7053	0.595544	0.999996	0.934709	LOC110031318	1
GO:0016796	exonuclease activity, active with either ribo- or deoxyribonucleic acids and producing 5'-phosphomonoesters	1/474	13/7053	0.595544	0.999996	0.934709	LOC110033294	1
GO:0019187	beta-1,4-mannosyltransferase activity	1/474	13/7053	0.595544	0.999996	0.934709	LOC110026391	1
GO:0030139	endocytic vesicle	1/474	13/7053	0.595544	0.999996	0.934709	LOC110027506	1
GO:0031072	heat shock protein binding	1/474	13/7053	0.595544	0.999996	0.934709	LOC110038884	1
GO:0032885	regulation of polysaccharide biosynthetic process	1/474	13/7053	0.595544	0.999996	0.934709	LOC110032131	1
GO:0034250	positive regulation of cellular amide metabolic process	1/474	13/7053	0.595544	0.999996	0.934709	LOC110024978	1
GO:0042157	lipoprotein metabolic process	1/474	13/7053	0.595544	0.999996	0.934709	LOC110038985	1
GO:0042158	lipoprotein biosynthetic process	1/474	13/7053	0.595544	0.999996	0.934709	LOC110038985	1
GO:0043009	chordate embryonic development	1/474	13/7053	0.595544	0.999996	0.934709	LOC110036409	1
GO:0043178	alcohol binding	1/474	13/7053	0.595544	0.999996	0.934709	LOC110030781	1
GO:0045727	positive regulation of translation	1/474	13/7053	0.595544	0.999996	0.934709	LOC110024978	1
GO:0045815	positive regulation of gene expression, epigenetic	1/474	13/7053	0.595544	0.999996	0.934709	LOC110026383	1
GO:0050403	trans-zeatin O-beta-D-glucosyltransferase activity	1/474	13/7053	0.595544	0.999996	0.934709	LOC110028987	1
GO:0050779	RNA destabilization	1/474	13/7053	0.595544	0.999996	0.934709	LOC110036409	1
GO:0051503	adenine nucleotide transport	1/474	13/7053	0.595544	0.999996	0.934709	LOC110037738	1
GO:0051753	mannan synthase activity	1/474	13/7053	0.595544	0.999996	0.934709	LOC110026391	1
GO:0052386	cell wall thickening	1/474	13/7053	0.595544	0.999996	0.934709	LOC110028691	1
GO:0052542	defense response by callose deposition	1/474	13/7053	0.595544	0.999996	0.934709	LOC110028691	1
GO:0052543	callose deposition in cell wall	1/474	13/7053	0.595544	0.999996	0.934709	LOC110028691	1
GO:0061157	mRNA destabilization	1/474	13/7053	0.595544	0.999996	0.934709	LOC110036409	1
GO:0071577	zinc ion transmembrane transport	1/474	13/7053	0.595544	0.999996	0.934709	LOC110023418	1
GO:1901658	glycosyl compound catabolic process	1/474	13/7053	0.595544	0.999996	0.934709	LOC110025063	1
GO:0010026	trichome differentiation	5/474	77/7053	0.597626	0.999996	0.934709	LOC110024910/LOC110019484/LOC110035507/LOC110019989/LOC110038679	5
GO:0061630	ubiquitin protein ligase activity	8/474	124/7053	0.600296	0.999996	0.934709	LOC110020431/LOC110029984/LOC110029447/LOC110036135/LOC110019484/LOC110035505/LOC110027004/LOC110018264	8
GO:0048513	animal organ development	3/474	46/7053	0.605994	0.999996	0.934709	LOC110030709/LOC110036409/LOC110033421	3
GO:0031349	positive regulation of defense response	4/474	62/7053	0.606955	0.999996	0.934709	LOC110018457/LOC110018441/LOC110036650/LOC110023020	4
GO:0002229	defense response to oomycetes	2/474	30/7053	0.608403	0.999996	0.934709	LOC110018457/LOC110023020	2
GO:0010268	brassinosteroid homeostasis	2/474	30/7053	0.608403	0.999996	0.934709	LOC110030934/LOC110026846	2
GO:0030031	cell projection assembly	2/474	30/7053	0.608403	0.999996	0.934709	LOC110017959/LOC110033421	2
GO:0031977	thylakoid lumen	2/474	30/7053	0.608403	0.999996	0.934709	LOC110027562/LOC110024830	2
GO:1901615	organic hydroxy compound metabolic process	10/474	156/7053	0.609052	0.999996	0.934709	LOC110032486/LOC110030934/LOC110026915/LOC110024926/LOC110031840/LOC110031047/LOC110024026/LOC110019341/LOC110026846/LOC110036606	10
GO:0032259	methylation	10/474	157/7053	0.617243	0.999996	0.934709	LOC110029507/LOC110021804/LOC110021641/LOC110029040/LOC110034502/LOC110029924/LOC110032624/LOC110039569/LOC110039568/LOC110023518	10
GO:0055035	plastid thylakoid membrane	8/474	126/7053	0.618616	0.999996	0.934709	LOC110032486/LOC110023588/LOC110024270/LOC110031670/LOC110018947/LOC110038717/LOC110021645/LOC110036606	8
GO:0044440	obsolete endosomal part	4/474	63/7053	0.619735	0.999996	0.934709	LOC110018571/LOC110027506/LOC110036855/LOC110032075	4
GO:0070838	divalent metal ion transport	4/474	63/7053	0.619735	0.999996	0.934709	LOC110023418/LOC110024760/LOC110027325/LOC110019177	4
GO:0048764	trichoblast maturation	5/474	79/7053	0.620663	0.999996	0.934709	LOC110026391/LOC110018337/LOC110037031/LOC110033792/LOC110026797	5
GO:0048765	root hair cell differentiation	5/474	79/7053	0.620663	0.999996	0.934709	LOC110026391/LOC110018337/LOC110037031/LOC110033792/LOC110026797	5
GO:0048868	pollen tube development	5/474	79/7053	0.620663	0.999996	0.934709	LOC110034009/LOC110027349/LOC110018292/LOC110026642/LOC110028360	5
GO:0001934	positive regulation of protein phosphorylation	3/474	47/7053	0.620755	0.999996	0.934709	LOC110020165/LOC110024030/LOC110019100	3
GO:0006869	lipid transport	3/474	47/7053	0.620755	0.999996	0.934709	LOC110036101/LOC110031076/LOC110035507	3
GO:0040034	regulation of development, heterochronic	3/474	47/7053	0.620755	0.999996	0.934709	LOC110037681/LOC110028202/LOC110027806	3
GO:0000792	heterochromatin	1/474	14/7053	0.622776	0.999996	0.934709	LOC110026383	1
GO:0004222	metalloendopeptidase activity	1/474	14/7053	0.622776	0.999996	0.934709	LOC110023451	1
GO:0005795	Golgi stack	1/474	14/7053	0.622776	0.999996	0.934709	LOC110031118	1
GO:0006641	triglyceride metabolic process	1/474	14/7053	0.622776	0.999996	0.934709	LOC110027014	1
GO:0009073	aromatic amino acid family biosynthetic process	1/474	14/7053	0.622776	0.999996	0.934709	LOC110022099	1
GO:0009313	oligosaccharide catabolic process	1/474	14/7053	0.622776	0.999996	0.934709	LOC110037681	1
GO:0009612	response to mechanical stimulus	1/474	14/7053	0.622776	0.999996	0.934709	LOC110020089	1
GO:0015695	organic cation transport	1/474	14/7053	0.622776	0.999996	0.934709	LOC110018571	1
GO:0015696	ammonium transport	1/474	14/7053	0.622776	0.999996	0.934709	LOC110018571	1
GO:0016671	oxidoreductase activity, acting on a sulfur group of donors, disulfide as acceptor	1/474	14/7053	0.622776	0.999996	0.934709	LOC110017809	1
GO:0016857	racemase and epimerase activity, acting on carbohydrates and derivatives	1/474	14/7053	0.622776	0.999996	0.934709	LOC110034390	1
GO:0031062	positive regulation of histone methylation	1/474	14/7053	0.622776	0.999996	0.934709	LOC110023449	1
GO:0034644	cellular response to UV	1/474	14/7053	0.622776	0.999996	0.934709	LOC110024270	1
GO:0042136	neurotransmitter biosynthetic process	1/474	14/7053	0.622776	0.999996	0.934709	LOC110019783	1
GO:0044770	cell cycle phase transition	1/474	14/7053	0.622776	0.999996	0.934709	LOC110029507	1
GO:0044772	mitotic cell cycle phase transition	1/474	14/7053	0.622776	0.999996	0.934709	LOC110029507	1
GO:0045036	protein targeting to chloroplast	1/474	14/7053	0.622776	0.999996	0.934709	LOC110035275	1
GO:0045834	positive regulation of lipid metabolic process	1/474	14/7053	0.622776	0.999996	0.934709	LOC110033898	1
GO:0046352	disaccharide catabolic process	1/474	14/7053	0.622776	0.999996	0.934709	LOC110037681	1
GO:0047893	flavonol 3-O-glucosyltransferase activity	1/474	14/7053	0.622776	0.999996	0.934709	LOC110031840	1
GO:0071216	cellular response to biotic stimulus	1/474	14/7053	0.622776	0.999996	0.934709	LOC110018457	1
GO:0072596	establishment of protein localization to chloroplast	1/474	14/7053	0.622776	0.999996	0.934709	LOC110035275	1
GO:1902905	positive regulation of supramolecular fiber organization	1/474	14/7053	0.622776	0.999996	0.934709	LOC110036409	1
GO:2000142	regulation of DNA-templated transcription, initiation	1/474	14/7053	0.622776	0.999996	0.934709	LOC110021308	1
GO:2000652	regulation of secondary cell wall biogenesis	1/474	14/7053	0.622776	0.999996	0.934709	LOC110037395	1
GO:0008237	metallopeptidase activity	2/474	31/7053	0.626459	0.999996	0.934709	LOC110023451/LOC110020107	2
GO:0015294	solute:cation symporter activity	2/474	31/7053	0.626459	0.999996	0.934709	LOC110031303/LOC110031086	2
GO:0030234	enzyme regulator activity	8/474	127/7053	0.627608	0.999996	0.934709	LOC110030781/LOC110037300/LOC110022361/LOC110025508/LOC110033510/LOC110025983/LOC110035791/LOC110038884	8
GO:0009411	response to UV	5/474	80/7053	0.631884	0.999996	0.934709	LOC110018457/LOC110026841/LOC110031047/LOC110024270/LOC110036023	5
GO:0010054	trichoblast differentiation	5/474	80/7053	0.631884	0.999996	0.934709	LOC110026391/LOC110018337/LOC110037031/LOC110033792/LOC110026797	5
GO:0048509	regulation of meristem development	5/474	80/7053	0.631884	0.999996	0.934709	LOC110028589/LOC110037681/LOC110028202/LOC110028362/LOC110027806	5
GO:0098655	cation transmembrane transport	12/474	190/7053	0.632014	0.999996	0.934709	LOC110022393/LOC110023418/LOC110033647/LOC110018571/LOC110026935/LOC110031303/LOC110027325/LOC110026797/LOC110035519/LOC110021182/LOC110032636/LOC110031086	12
GO:0072511	divalent inorganic cation transport	4/474	64/7053	0.632252	0.999996	0.934709	LOC110023418/LOC110024760/LOC110027325/LOC110019177	4
GO:0008144	drug binding	6/474	96/7053	0.632796	0.999996	0.934709	LOC110032486/LOC110033064/LOC110032714/LOC110024926/LOC110035275/LOC110027492	6
GO:0009808	lignin metabolic process	3/474	48/7053	0.635135	0.999996	0.934709	LOC110031047/LOC110031874/LOC110024447	3
GO:0003002	regionalization	7/474	113/7053	0.643781	0.999996	0.934709	LOC110018571/LOC110037395/LOC110036409/LOC110038062/LOC110037192/LOC110033421/LOC110035754	7
GO:0006694	steroid biosynthetic process	2/474	32/7053	0.643864	0.999996	0.934709	LOC110030934/LOC110024026	2
GO:0010948	negative regulation of cell cycle process	2/474	32/7053	0.643864	0.999996	0.934709	LOC110019989/LOC110038679	2
GO:0015293	symporter activity	2/474	32/7053	0.643864	0.999996	0.934709	LOC110031303/LOC110031086	2
GO:0016131	brassinosteroid metabolic process	2/474	32/7053	0.643864	0.999996	0.934709	LOC110030934/LOC110026846	2
GO:0046467	membrane lipid biosynthetic process	2/474	32/7053	0.643864	0.999996	0.934709	LOC110023786/LOC110028965	2
GO:0072657	protein localization to membrane	2/474	32/7053	0.643864	0.999996	0.934709	LOC110039157/LOC110030709	2
GO:0052689	carboxylic ester hydrolase activity	4/474	65/7053	0.644501	0.999996	0.934709	LOC110022361/LOC110025508/LOC110033510/LOC110025983	4
GO:0051049	regulation of transport	8/474	129/7053	0.645241	0.999996	0.934709	LOC110028691/LOC110018571/LOC110024419/LOC110028589/LOC110019453/LOC110029984/LOC110037226/LOC110033660	8
GO:0000030	mannosyltransferase activity	1/474	15/7053	0.648178	0.999996	0.934709	LOC110026391	1
GO:0000919	cell plate assembly	1/474	15/7053	0.648178	0.999996	0.934709	LOC110027595	1
GO:0002520	immune system development	1/474	15/7053	0.648178	0.999996	0.934709	LOC110030709	1
GO:0004185	serine-type carboxypeptidase activity	1/474	15/7053	0.648178	0.999996	0.934709	LOC110020627	1
GO:0005345	purine nucleobase transmembrane transporter activity	1/474	15/7053	0.648178	0.999996	0.934709	LOC110020599	1
GO:0005985	sucrose metabolic process	1/474	15/7053	0.648178	0.999996	0.934709	LOC110037681	1
GO:0006863	purine nucleobase transport	1/474	15/7053	0.648178	0.999996	0.934709	LOC110020599	1
GO:0009692	ethylene metabolic process	1/474	15/7053	0.648178	0.999996	0.934709	LOC110030067	1
GO:0009693	ethylene biosynthetic process	1/474	15/7053	0.648178	0.999996	0.934709	LOC110030067	1
GO:0010319	stromule	1/474	15/7053	0.648178	0.999996	0.934709	LOC110018947	1
GO:0010588	cotyledon vascular tissue pattern formation	1/474	15/7053	0.648178	0.999996	0.934709	LOC110035754	1
GO:0010921	regulation of phosphatase activity	1/474	15/7053	0.648178	0.999996	0.934709	LOC110030781	1
GO:0016998	cell wall macromolecule catabolic process	1/474	15/7053	0.648178	0.999996	0.934709	LOC110029610	1
GO:0017022	myosin binding	1/474	15/7053	0.648178	0.999996	0.934709	LOC110032714	1
GO:0017048	Rho GTPase binding	1/474	15/7053	0.648178	0.999996	0.934709	LOC110027595	1
GO:0018958	phenol-containing compound metabolic process	1/474	15/7053	0.648178	0.999996	0.934709	LOC110031047	1
GO:0035303	regulation of dephosphorylation	1/474	15/7053	0.648178	0.999996	0.934709	LOC110030781	1
GO:0043005	neuron projection	1/474	15/7053	0.648178	0.999996	0.934709	LOC110030709	1
GO:0043449	cellular alkene metabolic process	1/474	15/7053	0.648178	0.999996	0.934709	LOC110030067	1
GO:0043450	alkene biosynthetic process	1/474	15/7053	0.648178	0.999996	0.934709	LOC110030067	1
GO:0043489	RNA stabilization	1/474	15/7053	0.648178	0.999996	0.934709	LOC110036409	1
GO:0045202	synapse	1/474	15/7053	0.648178	0.999996	0.934709	LOC110030709	1
GO:0045597	positive regulation of cell differentiation	1/474	15/7053	0.648178	0.999996	0.934709	LOC110036409	1
GO:0052325	cell wall pectin biosynthetic process	1/474	15/7053	0.648178	0.999996	0.934709	LOC110021641	1
GO:0061014	positive regulation of mRNA catabolic process	1/474	15/7053	0.648178	0.999996	0.934709	LOC110036409	1
GO:0061077	chaperone-mediated protein folding	1/474	15/7053	0.648178	0.999996	0.934709	LOC110027974	1
GO:0072509	divalent inorganic cation transmembrane transporter activity	1/474	15/7053	0.648178	0.999996	0.934709	LOC110023418	1
GO:0072530	purine-containing compound transmembrane transport	1/474	15/7053	0.648178	0.999996	0.934709	LOC110020599	1
GO:0072598	protein localization to chloroplast	1/474	15/7053	0.648178	0.999996	0.934709	LOC110035275	1
GO:0080161	auxin transmembrane transporter activity	1/474	15/7053	0.648178	0.999996	0.934709	LOC110033792	1
GO:0097502	mannosylation	1/474	15/7053	0.648178	0.999996	0.934709	LOC110026391	1
GO:1900673	olefin metabolic process	1/474	15/7053	0.648178	0.999996	0.934709	LOC110030067	1
GO:1900674	olefin biosynthetic process	1/474	15/7053	0.648178	0.999996	0.934709	LOC110030067	1
GO:1902369	negative regulation of RNA catabolic process	1/474	15/7053	0.648178	0.999996	0.934709	LOC110036409	1
GO:1904823	purine nucleobase transmembrane transport	1/474	15/7053	0.648178	0.999996	0.934709	LOC110020599	1
GO:2000035	regulation of stem cell division	1/474	15/7053	0.648178	0.999996	0.934709	LOC110028202	1
GO:0032879	regulation of localization	10/474	161/7053	0.64912	0.999996	0.934709	LOC110023418/LOC110028691/LOC110018571/LOC110024419/LOC110028589/LOC110019453/LOC110029984/LOC110033421/LOC110037226/LOC110033660	10
GO:0010051	xylem and phloem pattern formation	3/474	49/7053	0.649132	0.999996	0.934709	LOC110018571/LOC110037395/LOC110035754	3
GO:0010562	positive regulation of phosphorus metabolic process	3/474	49/7053	0.649132	0.999996	0.934709	LOC110020165/LOC110024030/LOC110019100	3
GO:0030865	cortical cytoskeleton organization	3/474	49/7053	0.649132	0.999996	0.934709	LOC110020165/LOC110024030/LOC110019100	3
GO:0042327	positive regulation of phosphorylation	3/474	49/7053	0.649132	0.999996	0.934709	LOC110020165/LOC110024030/LOC110019100	3
GO:0045937	positive regulation of phosphate metabolic process	3/474	49/7053	0.649132	0.999996	0.934709	LOC110020165/LOC110024030/LOC110019100	3
GO:0061659	ubiquitin-like protein ligase activity	8/474	130/7053	0.653878	0.999996	0.934709	LOC110020431/LOC110029984/LOC110029447/LOC110036135/LOC110019484/LOC110035505/LOC110027004/LOC110018264	8
GO:0002239	response to oomycetes	2/474	33/7053	0.660622	0.999996	0.934709	LOC110018457/LOC110023020	2
GO:0005507	copper ion binding	2/474	33/7053	0.660622	0.999996	0.934709	LOC110037731/LOC110037859	2
GO:0009156	ribonucleoside monophosphate biosynthetic process	2/474	33/7053	0.660622	0.999996	0.934709	LOC110018947/LOC110026975	2
GO:0016128	phytosteroid metabolic process	2/474	33/7053	0.660622	0.999996	0.934709	LOC110030934/LOC110026846	2
GO:0019904	protein domain specific binding	2/474	33/7053	0.660622	0.999996	0.934709	LOC110031670/LOC110018947	2
GO:0051119	sugar transmembrane transporter activity	2/474	33/7053	0.660622	0.999996	0.934709	LOC110031003/LOC110031086	2
GO:0006351	transcription, DNA-templated	7/474	115/7053	0.662069	0.999996	0.934709	LOC110033051/LOC110037441/LOC110029376/LOC110027045/LOC110021308/LOC110019989/LOC110038679	7
GO:0001871	obsolete pattern binding	3/474	50/7053	0.662743	0.999996	0.934709	LOC110028048/LOC110030612/LOC110039058	3
GO:0009606	tropism	3/474	50/7053	0.662743	0.999996	0.934709	LOC110033792/LOC110038062/LOC110025018	3
GO:0023014	signal transduction by protein phosphorylation	3/474	50/7053	0.662743	0.999996	0.934709	LOC110020165/LOC110024030/LOC110019100	3
GO:0030247	polysaccharide binding	3/474	50/7053	0.662743	0.999996	0.934709	LOC110028048/LOC110030612/LOC110039058	3
GO:0032535	regulation of cellular component size	3/474	50/7053	0.662743	0.999996	0.934709	LOC110021174/LOC110019989/LOC110038679	3
GO:0045859	regulation of protein kinase activity	3/474	50/7053	0.662743	0.999996	0.934709	LOC110020165/LOC110024030/LOC110019100	3
GO:0048469	cell maturation	5/474	83/7053	0.66431	0.999996	0.934709	LOC110026391/LOC110018337/LOC110037031/LOC110033792/LOC110026797	5
GO:0015267	channel activity	4/474	67/7053	0.668184	0.999996	0.934709	LOC110027325/LOC110026797/LOC110020662/LOC110020089	4
GO:0022803	passive transmembrane transporter activity	4/474	67/7053	0.668184	0.999996	0.934709	LOC110027325/LOC110026797/LOC110020662/LOC110020089	4
GO:0016829	lyase activity	7/474	116/7053	0.670996	0.999996	0.934709	LOC110032486/LOC110022221/LOC110022099/LOC110030067/LOC110036591/LOC110031047/LOC110025063	7
GO:0097659	nucleic acid-templated transcription	7/474	116/7053	0.670996	0.999996	0.934709	LOC110033051/LOC110037441/LOC110029376/LOC110027045/LOC110021308/LOC110019989/LOC110038679	7
GO:0000070	mitotic sister chromatid segregation	1/474	16/7053	0.671872	0.999996	0.934709	LOC110025950	1
GO:0000381	regulation of alternative mRNA splicing, via spliceosome	1/474	16/7053	0.671872	0.999996	0.934709	LOC110036409	1
GO:0000794	condensed nuclear chromosome	1/474	16/7053	0.671872	0.999996	0.934709	LOC110020775	1
GO:0004180	carboxypeptidase activity	1/474	16/7053	0.671872	0.999996	0.934709	LOC110020627	1
GO:0004693	cyclin-dependent protein serine/threonine kinase activity	1/474	16/7053	0.671872	0.999996	0.934709	LOC110023020	1
GO:0006352	DNA-templated transcription, initiation	1/474	16/7053	0.671872	0.999996	0.934709	LOC110021308	1
GO:0007163	establishment or maintenance of cell polarity	1/474	16/7053	0.671872	0.999996	0.934709	LOC110030709	1
GO:0008574	ATP-dependent microtubule motor activity, plus-end-directed	1/474	16/7053	0.671872	0.999996	0.934709	LOC110025950	1
GO:0009690	cytokinin metabolic process	1/474	16/7053	0.671872	0.999996	0.934709	LOC110023168	1
GO:0015205	nucleobase transmembrane transporter activity	1/474	16/7053	0.671872	0.999996	0.934709	LOC110020599	1
GO:0015851	nucleobase transport	1/474	16/7053	0.671872	0.999996	0.934709	LOC110020599	1
GO:0030427	site of polarized growth	1/474	16/7053	0.671872	0.999996	0.934709	LOC110033660	1
GO:0031425	chloroplast RNA processing	1/474	16/7053	0.671872	0.999996	0.934709	LOC110038276	1
GO:0031647	regulation of protein stability	1/474	16/7053	0.671872	0.999996	0.934709	LOC110027150	1
GO:0032588	trans-Golgi network membrane	1/474	16/7053	0.671872	0.999996	0.934709	LOC110018571	1
GO:0044786	cell cycle DNA replication	1/474	16/7053	0.671872	0.999996	0.934709	LOC110019471	1
GO:0070008	serine-type exopeptidase activity	1/474	16/7053	0.671872	0.999996	0.934709	LOC110020627	1
GO:0097472	cyclin-dependent protein kinase activity	1/474	16/7053	0.671872	0.999996	0.934709	LOC110023020	1
GO:0050776	regulation of immune response	6/474	100/7053	0.672134	0.999996	0.934709	LOC110018457/LOC110036650/LOC110029720/LOC110026801/LOC110032131/LOC110034469	6
GO:0018193	peptidyl-amino acid modification	11/474	180/7053	0.673207	0.999996	0.934709	LOC110029507/LOC110018441/LOC110033924/LOC110035162/LOC110024201/LOC110032714/LOC110038259/LOC110028589/LOC110023763/LOC110024494/LOC110028468	11
GO:0019220	regulation of phosphate metabolic process	5/474	84/7053	0.674697	0.999996	0.934709	LOC110020165/LOC110024030/LOC110030781/LOC110027014/LOC110019100	5
GO:0051174	regulation of phosphorus metabolic process	5/474	84/7053	0.674697	0.999996	0.934709	LOC110020165/LOC110024030/LOC110030781/LOC110027014/LOC110019100	5
GO:0090066	regulation of anatomical structure size	3/474	51/7053	0.675967	0.999996	0.934709	LOC110021174/LOC110019989/LOC110038679	3
GO:0017148	negative regulation of translation	2/474	34/7053	0.676742	0.999996	0.934709	LOC110033294/LOC110036409	2
GO:0034249	negative regulation of cellular amide metabolic process	2/474	34/7053	0.676742	0.999996	0.934709	LOC110033294/LOC110036409	2
GO:0060429	epithelium development	2/474	34/7053	0.676742	0.999996	0.934709	LOC110036409/LOC110033421	2
GO:0009624	response to nematode	4/474	68/7053	0.679613	0.999996	0.934709	LOC110027908/LOC110023418/LOC110032003/LOC110028229	4
GO:0042325	regulation of phosphorylation	4/474	68/7053	0.679613	0.999996	0.934709	LOC110020165/LOC110024030/LOC110027014/LOC110019100	4
GO:0031667	response to nutrient levels	8/474	134/7053	0.687177	0.999996	0.934709	LOC110038259/LOC110037395/LOC110028589/LOC110023763/LOC110021163/LOC110017809/LOC110026844/LOC110022638	8
GO:0090558	plant epidermis development	11/474	182/7053	0.687338	0.999996	0.934709	LOC110024910/LOC110026391/LOC110018337/LOC110037031/LOC110033792/LOC110026797/LOC110019484/LOC110035507/LOC110019989/LOC110038679/LOC110026975	11
GO:0043085	positive regulation of catalytic activity	6/474	102/7053	0.690765	0.999996	0.934709	LOC110020165/LOC110024030/LOC110022349/LOC110022335/LOC110038884/LOC110019100	6
GO:0009124	nucleoside monophosphate biosynthetic process	2/474	35/7053	0.692234	0.999996	0.934709	LOC110018947/LOC110026975	2
GO:0003730	mRNA 3'-UTR binding	1/474	17/7053	0.693974	0.999996	0.934709	LOC110036409	1
GO:0005088	Ras guanyl-nucleotide exchange factor activity	1/474	17/7053	0.693974	0.999996	0.934709	LOC110027595	1
GO:0005249	voltage-gated potassium channel activity	1/474	17/7053	0.693974	0.999996	0.934709	LOC110026797	1
GO:0006826	iron ion transport	1/474	17/7053	0.693974	0.999996	0.934709	LOC110026935	1
GO:0006906	vesicle fusion	1/474	17/7053	0.693974	0.999996	0.934709	LOC110039157	1
GO:0010088	phloem development	1/474	17/7053	0.693974	0.999996	0.934709	LOC110018571	1
GO:0042133	neurotransmitter metabolic process	1/474	17/7053	0.693974	0.999996	0.934709	LOC110019783	1
GO:0043647	inositol phosphate metabolic process	1/474	17/7053	0.693974	0.999996	0.934709	LOC110024926	1
GO:0046173	polyol biosynthetic process	1/474	17/7053	0.693974	0.999996	0.934709	LOC110024926	1
GO:0050826	response to freezing	1/474	17/7053	0.693974	0.999996	0.934709	LOC110032131	1
GO:0051495	positive regulation of cytoskeleton organization	1/474	17/7053	0.693974	0.999996	0.934709	LOC110036409	1
GO:0090174	organelle membrane fusion	1/474	17/7053	0.693974	0.999996	0.934709	LOC110039157	1
GO:1900457	regulation of brassinosteroid mediated signaling pathway	1/474	17/7053	0.693974	0.999996	0.934709	LOC110027082	1
GO:1901606	alpha-amino acid catabolic process	1/474	17/7053	0.693974	0.999996	0.934709	LOC110019341	1
GO:1903312	negative regulation of mRNA metabolic process	1/474	17/7053	0.693974	0.999996	0.934709	LOC110036409	1
GO:0042995	cell projection	5/474	86/7053	0.694826	0.999996	0.934709	LOC110030709/LOC110017959/LOC110033421/LOC110025950/LOC110033660	5
GO:0120025	plasma membrane bounded cell projection	5/474	86/7053	0.694826	0.999996	0.934709	LOC110030709/LOC110017959/LOC110033421/LOC110025950/LOC110033660	5
GO:0046873	metal ion transmembrane transporter activity	7/474	119/7053	0.696891	0.999996	0.934709	LOC110023418/LOC110026935/LOC110027325/LOC110026797/LOC110035519/LOC110021182/LOC110032636	7
GO:1901617	organic hydroxy compound biosynthetic process	6/474	103/7053	0.699815	0.999996	0.934709	LOC110030934/LOC110026915/LOC110024926/LOC110031840/LOC110024026/LOC110019341	6
GO:0043549	regulation of kinase activity	3/474	53/7053	0.701259	0.999996	0.934709	LOC110020165/LOC110024030/LOC110019100	3
GO:0005743	mitochondrial inner membrane	4/474	70/7053	0.701639	0.999996	0.934709	LOC110021539/LOC110037738/LOC110026841/LOC110025071	4
GO:0032774	RNA biosynthetic process	7/474	120/7053	0.705222	0.999996	0.934709	LOC110033051/LOC110037441/LOC110029376/LOC110027045/LOC110021308/LOC110019989/LOC110038679	7
GO:0005261	cation channel activity	2/474	36/7053	0.707108	0.999996	0.934709	LOC110027325/LOC110026797	2
GO:0006778	porphyrin-containing compound metabolic process	2/474	36/7053	0.707108	0.999996	0.934709	LOC110030709/LOC110031118	2
GO:0030863	cortical cytoskeleton	2/474	36/7053	0.707108	0.999996	0.934709	LOC110032714/LOC110030709	2
GO:0000226	microtubule cytoskeleton organization	6/474	104/7053	0.708686	0.999996	0.934709	LOC110020165/LOC110024030/LOC110017959/LOC110033421/LOC110025950/LOC110019100	6
GO:0009967	positive regulation of signal transduction	6/474	104/7053	0.708686	0.999996	0.934709	LOC110020165/LOC110024030/LOC110037226/LOC110026323/LOC110027004/LOC110019100	6
GO:0034637	cellular carbohydrate biosynthetic process	6/474	104/7053	0.708686	0.999996	0.934709	LOC110027083/LOC110021707/LOC110027413/LOC110021641/LOC110029837/LOC110035746	6
GO:0009932	cell tip growth	4/474	71/7053	0.712235	0.999996	0.934709	LOC110034009/LOC110019757/LOC110018292/LOC110028360	4
GO:0006972	hyperosmotic response	3/474	54/7053	0.713331	0.999996	0.934709	LOC110029484/LOC110028229/LOC110019012	3
GO:0009860	pollen tube growth	3/474	54/7053	0.713331	0.999996	0.934709	LOC110034009/LOC110018292/LOC110028360	3
GO:0000288	nuclear-transcribed mRNA catabolic process, deadenylation-dependent decay	1/474	18/7053	0.714591	0.999996	0.934709	LOC110033294	1
GO:0005741	mitochondrial outer membrane	1/474	18/7053	0.714591	0.999996	0.934709	LOC110026841	1
GO:0006638	neutral lipid metabolic process	1/474	18/7053	0.714591	0.999996	0.934709	LOC110027014	1
GO:0006639	acylglycerol metabolic process	1/474	18/7053	0.714591	0.999996	0.934709	LOC110027014	1
GO:0006888	endoplasmic reticulum to Golgi vesicle-mediated transport	1/474	18/7053	0.714591	0.999996	0.934709	LOC110030709	1
GO:0006898	receptor-mediated endocytosis	1/474	18/7053	0.714591	0.999996	0.934709	LOC110028691	1
GO:0009750	response to fructose	1/474	18/7053	0.714591	0.999996	0.934709	LOC110028202	1
GO:0009792	embryo development ending in birth or egg hatching	1/474	18/7053	0.714591	0.999996	0.934709	LOC110036409	1
GO:0030864	cortical actin cytoskeleton	1/474	18/7053	0.714591	0.999996	0.934709	LOC110032714	1
GO:0031058	positive regulation of histone modification	1/474	18/7053	0.714591	0.999996	0.934709	LOC110023449	1
GO:0031060	regulation of histone methylation	1/474	18/7053	0.714591	0.999996	0.934709	LOC110023449	1
GO:0031902	late endosome membrane	1/474	18/7053	0.714591	0.999996	0.934709	LOC110027506	1
GO:0032881	regulation of polysaccharide metabolic process	1/474	18/7053	0.714591	0.999996	0.934709	LOC110032131	1
GO:0048508	embryonic meristem development	1/474	18/7053	0.714591	0.999996	0.934709	LOC110018571	1
GO:0051187	obsolete cofactor catabolic process	1/474	18/7053	0.714591	0.999996	0.934709	LOC110033183	1
GO:0072507	divalent inorganic cation homeostasis	1/474	18/7053	0.714591	0.999996	0.934709	LOC110024760	1
GO:2000762	regulation of phenylpropanoid metabolic process	1/474	18/7053	0.714591	0.999996	0.934709	LOC110037395	1
GO:0009686	gibberellin biosynthetic process	2/474	37/7053	0.721379	0.999996	0.934709	LOC110038145/LOC110028202	2
GO:0033013	tetrapyrrole metabolic process	2/474	37/7053	0.721379	0.999996	0.934709	LOC110030709/LOC110031118	2
GO:0046915	transition metal ion transmembrane transporter activity	2/474	37/7053	0.721379	0.999996	0.934709	LOC110023418/LOC110026935	2
GO:0009553	embryo sac development	4/474	72/7053	0.722554	0.999996	0.934709	LOC110036591/LOC110022349/LOC110021308/LOC110022335	4
GO:0031966	mitochondrial membrane	5/474	89/7053	0.723389	0.999996	0.934709	LOC110021539/LOC110037738/LOC110026841/LOC110025071/LOC110024026	5
GO:0030162	regulation of proteolysis	3/474	55/7053	0.725022	0.999996	0.934709	LOC110019473/LOC110022349/LOC110022335	3
GO:0016051	carbohydrate biosynthetic process	8/474	139/7053	0.72588	0.999996	0.934709	LOC110027083/LOC110026137/LOC110021707/LOC110027413/LOC110021641/LOC110029837/LOC110034390/LOC110035746	8
GO:0031669	cellular response to nutrient levels	6/474	106/7053	0.725889	0.999996	0.934709	LOC110038259/LOC110028589/LOC110023763/LOC110021163/LOC110026844/LOC110022638	6
GO:0048646	anatomical structure formation involved in morphogenesis	11/474	188/7053	0.727485	0.999996	0.934709	LOC110037395/LOC110021855/LOC110026381/LOC110034485/LOC110036409/LOC110027506/LOC110031103/LOC110027892/LOC110038424/LOC110028362/LOC110018528	11
GO:0003682	chromatin binding	4/474	73/7053	0.732597	0.999996	0.934709	LOC110029507/LOC110033051/LOC110029376/LOC110027045	4
GO:0007389	pattern specification process	8/474	140/7053	0.733221	0.999996	0.934709	LOC110018571/LOC110037395/LOC110036409/LOC110038062/LOC110037192/LOC110033421/LOC110028745/LOC110035754	8
GO:0034357	photosynthetic membrane	8/474	140/7053	0.733221	0.999996	0.934709	LOC110032486/LOC110023588/LOC110024270/LOC110031670/LOC110018947/LOC110038717/LOC110021645/LOC110036606	8
GO:0042651	thylakoid membrane	8/474	140/7053	0.733221	0.999996	0.934709	LOC110032486/LOC110023588/LOC110024270/LOC110031670/LOC110018947/LOC110038717/LOC110021645/LOC110036606	8
GO:0000373	Group II intron splicing	1/474	19/7053	0.733821	0.999996	0.934709	LOC110031318	1
GO:0009063	cellular amino acid catabolic process	1/474	19/7053	0.733821	0.999996	0.934709	LOC110019341	1
GO:0009902	chloroplast relocation	1/474	19/7053	0.733821	0.999996	0.934709	LOC110018061	1
GO:0009903	chloroplast avoidance movement	1/474	19/7053	0.733821	0.999996	0.934709	LOC110018061	1
GO:0010014	meristem initiation	1/474	19/7053	0.733821	0.999996	0.934709	LOC110028362	1
GO:0010315	auxin efflux	1/474	19/7053	0.733821	0.999996	0.934709	LOC110033792	1
GO:0010563	negative regulation of phosphorus metabolic process	1/474	19/7053	0.733821	0.999996	0.934709	LOC110030781	1
GO:0015020	glucuronosyltransferase activity	1/474	19/7053	0.733821	0.999996	0.934709	LOC110028987	1
GO:0019722	calcium-mediated signaling	1/474	19/7053	0.733821	0.999996	0.934709	LOC110036163	1
GO:0019750	chloroplast localization	1/474	19/7053	0.733821	0.999996	0.934709	LOC110018061	1
GO:0022843	voltage-gated cation channel activity	1/474	19/7053	0.733821	0.999996	0.934709	LOC110026797	1
GO:0033037	polysaccharide localization	1/474	19/7053	0.733821	0.999996	0.934709	LOC110028691	1
GO:0045936	negative regulation of phosphate metabolic process	1/474	19/7053	0.733821	0.999996	0.934709	LOC110030781	1
GO:0046620	regulation of organ growth	1/474	19/7053	0.733821	0.999996	0.934709	LOC110036855	1
GO:0051286	cell tip	1/474	19/7053	0.733821	0.999996	0.934709	LOC110033660	1
GO:0051644	plastid localization	1/474	19/7053	0.733821	0.999996	0.934709	LOC110018061	1
GO:0051667	establishment of plastid localization	1/474	19/7053	0.733821	0.999996	0.934709	LOC110018061	1
GO:0052545	callose localization	1/474	19/7053	0.733821	0.999996	0.934709	LOC110028691	1
GO:0070696	transmembrane receptor protein serine/threonine kinase binding	1/474	19/7053	0.733821	0.999996	0.934709	LOC110033451	1
GO:0097458	obsolete neuron part	1/474	19/7053	0.733821	0.999996	0.934709	LOC110030709	1
GO:1905268	negative regulation of chromatin organization	1/474	19/7053	0.733821	0.999996	0.934709	LOC110026383	1
GO:0010074	maintenance of meristem identity	2/474	38/7053	0.735059	0.999996	0.934709	LOC110021172/LOC110028362	2
GO:0048532	anatomical structure arrangement	2/474	38/7053	0.735059	0.999996	0.934709	LOC110021172/LOC110028362	2
GO:0048825	cotyledon development	2/474	38/7053	0.735059	0.999996	0.934709	LOC110030179/LOC110035754	2
GO:0005740	mitochondrial envelope	5/474	91/7053	0.74134	0.999996	0.934709	LOC110021539/LOC110037738/LOC110026841/LOC110025071/LOC110024026	5
GO:0019725	cellular homeostasis	5/474	91/7053	0.74134	0.999996	0.934709	LOC110030337/LOC110026935/LOC110033897/LOC110033880/LOC110037859	5
GO:0000976	transcription regulatory region sequence-specific DNA binding	4/474	74/7053	0.742365	0.999996	0.934709	LOC110033051/LOC110029376/LOC110027045/LOC110026323	4
GO:0002682	regulation of immune system process	6/474	108/7053	0.742371	0.999996	0.934709	LOC110018457/LOC110036650/LOC110029720/LOC110026801/LOC110032131/LOC110034469	6
GO:0023056	positive regulation of signaling	6/474	108/7053	0.742371	0.999996	0.934709	LOC110020165/LOC110024030/LOC110037226/LOC110026323/LOC110027004/LOC110019100	6
GO:0030258	lipid modification	3/474	57/7053	0.747285	0.999996	0.934709	LOC110022556/LOC110036591/LOC110018528	3
GO:0000904	cell morphogenesis involved in differentiation	8/474	142/7053	0.747499	0.999996	0.934709	LOC110024910/LOC110034009/LOC110018292/LOC110028360/LOC110019484/LOC110035507/LOC110019989/LOC110038679	8
GO:0016050	vesicle organization	2/474	39/7053	0.748163	0.999996	0.934709	LOC110039157/LOC110036101	2
GO:0000045	autophagosome assembly	1/474	20/7053	0.751758	0.999996	0.934709	LOC110038985	1
GO:0000149	SNARE binding	1/474	20/7053	0.751758	0.999996	0.934709	LOC110039157	1
GO:0005267	potassium channel activity	1/474	20/7053	0.751758	0.999996	0.934709	LOC110026797	1
GO:0006885	regulation of pH	1/474	20/7053	0.751758	0.999996	0.934709	LOC110030337	1
GO:0008483	transaminase activity	1/474	20/7053	0.751758	0.999996	0.934709	LOC110019341	1
GO:0009226	nucleotide-sugar biosynthetic process	1/474	20/7053	0.751758	0.999996	0.934709	LOC110035730	1
GO:0010959	regulation of metal ion transport	1/474	20/7053	0.751758	0.999996	0.934709	LOC110028589	1
GO:0016769	transferase activity, transferring nitrogenous groups	1/474	20/7053	0.751758	0.999996	0.934709	LOC110019341	1
GO:0019200	carbohydrate kinase activity	1/474	20/7053	0.751758	0.999996	0.934709	LOC110026975	1
GO:0032155	obsolete cell division site part	1/474	20/7053	0.751758	0.999996	0.934709	LOC110032714	1
GO:0042548	regulation of photosynthesis, light reaction	1/474	20/7053	0.751758	0.999996	0.934709	LOC110020107	1
GO:0043200	response to amino acid	1/474	20/7053	0.751758	0.999996	0.934709	LOC110028229	1
GO:0046364	monosaccharide biosynthetic process	1/474	20/7053	0.751758	0.999996	0.934709	LOC110034390	1
GO:1905269	positive regulation of chromatin organization	1/474	20/7053	0.751758	0.999996	0.934709	LOC110023449	1
GO:1990939	ATP-dependent microtubule motor activity	1/474	20/7053	0.751758	0.999996	0.934709	LOC110025950	1
GO:0031401	positive regulation of protein modification process	4/474	75/7053	0.75186	0.999996	0.934709	LOC110020165/LOC110024030/LOC110023449/LOC110019100	4
GO:0008374	O-acyltransferase activity	3/474	58/7053	0.757865	0.999996	0.934709	LOC110022915/LOC110027888/LOC110037767	3
GO:0009813	flavonoid biosynthetic process	3/474	58/7053	0.757865	0.999996	0.934709	LOC110029484/LOC110031840/LOC110019012	3
GO:0000988	obsolete transcription factor activity, protein binding	5/474	93/7053	0.758423	0.999996	0.934709	LOC110025017/LOC110027082/LOC110022840/LOC110021308/LOC110027885	5
GO:0006643	membrane lipid metabolic process	2/474	40/7053	0.760708	0.999996	0.934709	LOC110023786/LOC110028965	2
GO:0009630	gravitropism	2/474	40/7053	0.760708	0.999996	0.934709	LOC110033792/LOC110038062	2
GO:0009746	response to hexose	2/474	40/7053	0.760708	0.999996	0.934709	LOC110026604/LOC110028202	2
GO:0034284	response to monosaccharide	2/474	40/7053	0.760708	0.999996	0.934709	LOC110026604/LOC110028202	2
GO:0034404	nucleobase-containing small molecule biosynthetic process	2/474	40/7053	0.760708	0.999996	0.934709	LOC110018947/LOC110026975	2
GO:0010647	positive regulation of cell communication	6/474	111/7053	0.765743	0.999996	0.934709	LOC110020165/LOC110024030/LOC110037226/LOC110026323/LOC110027004/LOC110019100	6
GO:1990837	sequence-specific double-stranded DNA binding	5/474	94/7053	0.766642	0.999996	0.934709	LOC110033051/LOC110026290/LOC110029376/LOC110027045/LOC110026323	5
GO:0051259	protein complex oligomerization	3/474	59/7053	0.768085	0.999996	0.934709	LOC110029484/LOC110020662/LOC110019012	3
GO:0004190	aspartic-type endopeptidase activity	1/474	21/7053	0.768489	0.999996	0.934709	LOC110036052	1
GO:0009119	ribonucleoside metabolic process	1/474	21/7053	0.768489	0.999996	0.934709	LOC110018947	1
GO:0009742	brassinosteroid mediated signaling pathway	1/474	21/7053	0.768489	0.999996	0.934709	LOC110024792	1
GO:0010492	maintenance of shoot apical meristem identity	1/474	21/7053	0.768489	0.999996	0.934709	LOC110028362	1
GO:0015850	organic hydroxy compound transport	1/474	21/7053	0.768489	0.999996	0.934709	LOC110031076	1
GO:0016854	racemase and epimerase activity	1/474	21/7053	0.768489	0.999996	0.934709	LOC110034390	1
GO:0031330	negative regulation of cellular catabolic process	1/474	21/7053	0.768489	0.999996	0.934709	LOC110036409	1
GO:0042054	histone methyltransferase activity	1/474	21/7053	0.768489	0.999996	0.934709	LOC110029507	1
GO:0051270	regulation of cellular component movement	1/474	21/7053	0.768489	0.999996	0.934709	LOC110033421	1
GO:0070001	aspartic-type peptidase activity	1/474	21/7053	0.768489	0.999996	0.934709	LOC110036052	1
GO:0071417	cellular response to organonitrogen compound	1/474	21/7053	0.768489	0.999996	0.934709	LOC110033064	1
GO:0072528	pyrimidine-containing compound biosynthetic process	1/474	21/7053	0.768489	0.999996	0.934709	LOC110018947	1
GO:0080113	regulation of seed growth	1/474	21/7053	0.768489	0.999996	0.934709	LOC110028362	1
GO:0090150	establishment of protein localization to membrane	1/474	21/7053	0.768489	0.999996	0.934709	LOC110039157	1
GO:0140030	modification-dependent protein binding	1/474	21/7053	0.768489	0.999996	0.934709	LOC110023449	1
GO:0046148	pigment biosynthetic process	4/474	77/7053	0.770041	0.999996	0.934709	LOC110029484/LOC110026915/LOC110031840/LOC110019012	4
GO:0051052	regulation of DNA metabolic process	4/474	77/7053	0.770041	0.999996	0.934709	LOC110022349/LOC110022335/LOC110019989/LOC110038679	4
GO:0097435	supramolecular fiber organization	4/474	77/7053	0.770041	0.999996	0.934709	LOC110020165/LOC110024030/LOC110025950/LOC110019100	4
GO:0009161	ribonucleoside monophosphate metabolic process	2/474	41/7053	0.772708	0.999996	0.934709	LOC110018947/LOC110026975	2
GO:0009629	response to gravity	2/474	41/7053	0.772708	0.999996	0.934709	LOC110033792/LOC110038062	2
GO:0016556	mRNA modification	2/474	41/7053	0.772708	0.999996	0.934709	LOC110018202/LOC110022430	2
GO:0045165	cell fate commitment	2/474	41/7053	0.772708	0.999996	0.934709	LOC110038062/LOC110023406	2
GO:0032504	multicellular organism reproduction	6/474	112/7053	0.773176	0.999996	0.934709	LOC110022556/LOC110037226/LOC110019484/LOC110035791/LOC110035505/LOC110035507	6
GO:0009856	pollination	6/474	113/7053	0.780432	0.999996	0.934709	LOC110034009/LOC110032336/LOC110027349/LOC110018292/LOC110026642/LOC110028360	6
GO:0044706	multi-multicellular organism process	6/474	113/7053	0.780432	0.999996	0.934709	LOC110034009/LOC110032336/LOC110027349/LOC110018292/LOC110026642/LOC110028360	6
GO:0000793	condensed chromosome	1/474	22/7053	0.784094	0.999996	0.934709	LOC110020775	1
GO:0008028	monocarboxylic acid transmembrane transporter activity	1/474	22/7053	0.784094	0.999996	0.934709	LOC110031076	1
GO:0009116	nucleoside metabolic process	1/474	22/7053	0.784094	0.999996	0.934709	LOC110018947	1
GO:0010192	mucilage biosynthetic process	1/474	22/7053	0.784094	0.999996	0.934709	LOC110038695	1
GO:0016831	carboxy-lyase activity	1/474	22/7053	0.784094	0.999996	0.934709	LOC110022221	1
GO:0019395	fatty acid oxidation	1/474	22/7053	0.784094	0.999996	0.934709	LOC110036591	1
GO:0035966	response to topologically incorrect protein	1/474	22/7053	0.784094	0.999996	0.934709	LOC110019484	1
GO:0035967	cellular response to topologically incorrect protein	1/474	22/7053	0.784094	0.999996	0.934709	LOC110019484	1
GO:0045017	glycerolipid biosynthetic process	1/474	22/7053	0.784094	0.999996	0.934709	LOC110027014	1
GO:0046835	carbohydrate phosphorylation	1/474	22/7053	0.784094	0.999996	0.934709	LOC110026975	1
GO:1905037	autophagosome organization	1/474	22/7053	0.784094	0.999996	0.934709	LOC110038985	1
GO:0009524	phragmoplast	2/474	42/7053	0.78418	0.999996	0.934709	LOC110022191/LOC110018571	2
GO:0015144	carbohydrate transmembrane transporter activity	2/474	42/7053	0.78418	0.999996	0.934709	LOC110031003/LOC110031086	2
GO:0034219	carbohydrate transmembrane transport	2/474	42/7053	0.78418	0.999996	0.934709	LOC110031003/LOC110031086	2
GO:0032269	negative regulation of cellular protein metabolic process	4/474	79/7053	0.787163	0.999996	0.934709	LOC110033294/LOC110030781/LOC110026383/LOC110036409	4
GO:0005524	ATP binding	3/474	61/7053	0.78747	0.999996	0.934709	LOC110032714/LOC110024926/LOC110035275	3
GO:0007005	mitochondrion organization	3/474	61/7053	0.78747	0.999996	0.934709	LOC110037738/LOC110026841/LOC110038985	3
GO:0022838	#N/A	3/474	61/7053	0.78747	0.999996	0.934709	LOC110027325/LOC110026797/LOC110020662	3
GO:0022890	inorganic cation transmembrane transporter activity	9/474	165/7053	0.788243	0.999996	0.934709	LOC110023418/LOC110026935/LOC110031303/LOC110027325/LOC110026797/LOC110035519/LOC110021182/LOC110032636/LOC110031086	9
GO:0031399	regulation of protein modification process	6/474	115/7053	0.794416	0.999996	0.934709	LOC110020165/LOC110024030/LOC110030781/LOC110023449/LOC110026383/LOC110019100	6
GO:0048438	floral whorl development	6/474	115/7053	0.794416	0.999996	0.934709	LOC110022556/LOC110019471/LOC110039286/LOC110026290/LOC110035505/LOC110027885	6
GO:0006457	protein folding	2/474	43/7053	0.795141	0.999996	0.934709	LOC110027974/LOC110035132	2
GO:0009740	gibberellic acid mediated signaling pathway	2/474	43/7053	0.795141	0.999996	0.934709	LOC110039286/LOC110027885	2
GO:0009809	lignin biosynthetic process	2/474	43/7053	0.795141	0.999996	0.934709	LOC110031874/LOC110024447	2
GO:0010039	response to iron ion	2/474	43/7053	0.795141	0.999996	0.934709	LOC110027908/LOC110028202	2
GO:0030029	actin filament-based process	2/474	43/7053	0.795141	0.999996	0.934709	LOC110032714/LOC110018061	2
GO:0031406	carboxylic acid binding	2/474	43/7053	0.795141	0.999996	0.934709	LOC110030781/LOC110027492	2
GO:0043177	organic acid binding	2/474	43/7053	0.795141	0.999996	0.934709	LOC110030781/LOC110027492	2
GO:0001932	regulation of protein phosphorylation	3/474	62/7053	0.796649	0.999996	0.934709	LOC110020165/LOC110024030/LOC110019100	3
GO:0010638	positive regulation of organelle organization	3/474	62/7053	0.796649	0.999996	0.934709	LOC110030709/LOC110023449/LOC110036409	3
GO:0030246	carbohydrate binding	3/474	62/7053	0.796649	0.999996	0.934709	LOC110028048/LOC110030612/LOC110039058	3
GO:0000819	sister chromatid segregation	1/474	23/7053	0.798649	0.999996	0.934709	LOC110025950	1
GO:0006096	glycolytic process	1/474	23/7053	0.798649	0.999996	0.934709	LOC110026975	1
GO:0006757	ATP generation from ADP	1/474	23/7053	0.798649	0.999996	0.934709	LOC110026975	1
GO:0009062	fatty acid catabolic process	1/474	23/7053	0.798649	0.999996	0.934709	LOC110037031	1
GO:0009504	cell plate	1/474	23/7053	0.798649	0.999996	0.934709	LOC110039157	1
GO:0010191	mucilage metabolic process	1/474	23/7053	0.798649	0.999996	0.934709	LOC110038695	1
GO:0042866	pyruvate biosynthetic process	1/474	23/7053	0.798649	0.999996	0.934709	LOC110026975	1
GO:0043488	regulation of mRNA stability	1/474	23/7053	0.798649	0.999996	0.934709	LOC110036409	1
GO:0045489	pectin biosynthetic process	1/474	23/7053	0.798649	0.999996	0.934709	LOC110021641	1
GO:0046031	ADP metabolic process	1/474	23/7053	0.798649	0.999996	0.934709	LOC110026975	1
GO:0098660	inorganic ion transmembrane transport	10/474	184/7053	0.800876	0.999996	0.934709	LOC110023418/LOC110021539/LOC110031303/LOC110027325/LOC110026797/LOC110025071/LOC110035519/LOC110021182/LOC110032636/LOC110031086	10
GO:0000139	Golgi membrane	4/474	81/7053	0.803254	0.999996	0.934709	LOC110018942/LOC110026391/LOC110018571/LOC110031118	4
GO:0005543	phospholipid binding	3/474	63/7053	0.805494	0.999996	0.934709	LOC110021172/LOC110038985/LOC110022005	3
GO:0010090	trichome morphogenesis	3/474	63/7053	0.805494	0.999996	0.934709	LOC110024910/LOC110019989/LOC110038679	3
GO:0008643	carbohydrate transport	2/474	44/7053	0.805607	0.999996	0.934709	LOC110031003/LOC110031086	2
GO:0015980	energy derivation by oxidation of organic compounds	2/474	44/7053	0.805607	0.999996	0.934709	LOC110027083/LOC110021969	2
GO:0022836	gated channel activity	2/474	44/7053	0.805607	0.999996	0.934709	LOC110026797/LOC110020089	2
GO:0008289	lipid binding	4/474	82/7053	0.810923	0.999996	0.934709	LOC110021172/LOC110030781/LOC110038985/LOC110022005	4
GO:0003713	transcription coactivator activity	1/474	24/7053	0.812225	0.999996	0.934709	LOC110026020	1
GO:0004712	protein serine/threonine/tyrosine kinase activity	1/474	24/7053	0.812225	0.999996	0.934709	LOC110028202	1
GO:0005351	carbohydrate:proton symporter activity	1/474	24/7053	0.812225	0.999996	0.934709	LOC110031086	1
GO:0005355	glucose transmembrane transporter activity	1/474	24/7053	0.812225	0.999996	0.934709	LOC110031086	1
GO:0005402	carbohydrate:cation symporter activity	1/474	24/7053	0.812225	0.999996	0.934709	LOC110031086	1
GO:0006165	nucleoside diphosphate phosphorylation	1/474	24/7053	0.812225	0.999996	0.934709	LOC110026975	1
GO:0007131	reciprocal meiotic recombination	1/474	24/7053	0.812225	0.999996	0.934709	LOC110020775	1
GO:0007584	response to nutrient	1/474	24/7053	0.812225	0.999996	0.934709	LOC110017809	1
GO:0008276	protein methyltransferase activity	1/474	24/7053	0.812225	0.999996	0.934709	LOC110029507	1
GO:0008645	hexose transmembrane transport	1/474	24/7053	0.812225	0.999996	0.934709	LOC110031086	1
GO:0009135	purine nucleoside diphosphate metabolic process	1/474	24/7053	0.812225	0.999996	0.934709	LOC110026975	1
GO:0009179	purine ribonucleoside diphosphate metabolic process	1/474	24/7053	0.812225	0.999996	0.934709	LOC110026975	1
GO:0009185	ribonucleoside diphosphate metabolic process	1/474	24/7053	0.812225	0.999996	0.934709	LOC110026975	1
GO:0009749	response to glucose	1/474	24/7053	0.812225	0.999996	0.934709	LOC110026604	1
GO:0009986	cell surface	1/474	24/7053	0.812225	0.999996	0.934709	LOC110027506	1
GO:0015149	hexose transmembrane transporter activity	1/474	24/7053	0.812225	0.999996	0.934709	LOC110031086	1
GO:0016132	brassinosteroid biosynthetic process	1/474	24/7053	0.812225	0.999996	0.934709	LOC110030934	1
GO:0016836	hydro-lyase activity	1/474	24/7053	0.812225	0.999996	0.934709	LOC110032486	1
GO:0035825	homologous recombination	1/474	24/7053	0.812225	0.999996	0.934709	LOC110020775	1
GO:0042391	regulation of membrane potential	1/474	24/7053	0.812225	0.999996	0.934709	LOC110026797	1
GO:0043648	dicarboxylic acid metabolic process	1/474	24/7053	0.812225	0.999996	0.934709	LOC110038923	1
GO:0046323	glucose import	1/474	24/7053	0.812225	0.999996	0.934709	LOC110031086	1
GO:0046939	nucleotide phosphorylation	1/474	24/7053	0.812225	0.999996	0.934709	LOC110026975	1
GO:0046982	protein heterodimerization activity	1/474	24/7053	0.812225	0.999996	0.934709	LOC110039286	1
GO:0051015	actin filament binding	1/474	24/7053	0.812225	0.999996	0.934709	LOC110024213	1
GO:1903313	positive regulation of mRNA metabolic process	1/474	24/7053	0.812225	0.999996	0.934709	LOC110036409	1
GO:1904659	glucose transmembrane transport	1/474	24/7053	0.812225	0.999996	0.934709	LOC110031086	1
GO:0006887	exocytosis	2/474	45/7053	0.815595	0.999996	0.934709	LOC110039157/LOC110030709	2
GO:0010476	gibberellin mediated signaling pathway	2/474	45/7053	0.815595	0.999996	0.934709	LOC110039286/LOC110027885	2
GO:0008219	cell death	4/474	83/7053	0.818347	0.999996	0.934709	LOC110036052/LOC110026841/LOC110035168/LOC110020089	4
GO:0000981	DNA-binding transcription factor activity, RNA polymerase II-specific	6/474	119/7053	0.820324	0.999996	0.934709	LOC110025017/LOC110033051/LOC110022840/LOC110029376/LOC110027045/LOC110027885	6
GO:0009812	flavonoid metabolic process	3/474	65/7053	0.822217	0.999996	0.934709	LOC110029484/LOC110031840/LOC110019012	3
GO:0004527	exonuclease activity	1/474	25/7053	0.824888	0.999996	0.934709	LOC110033294	1
GO:0008565	obsolete protein transporter activity	1/474	25/7053	0.824888	0.999996	0.934709	LOC110033278	1
GO:0009225	nucleotide-sugar metabolic process	1/474	25/7053	0.824888	0.999996	0.934709	LOC110035730	1
GO:0009626	plant-type hypersensitive response	1/474	25/7053	0.824888	0.999996	0.934709	LOC110026841	1
GO:0015145	monosaccharide transmembrane transporter activity	1/474	25/7053	0.824888	0.999996	0.934709	LOC110031086	1
GO:0015749	monosaccharide transmembrane transport	1/474	25/7053	0.824888	0.999996	0.934709	LOC110031086	1
GO:0016129	phytosteroid biosynthetic process	1/474	25/7053	0.824888	0.999996	0.934709	LOC110030934	1
GO:0016410	N-acyltransferase activity	1/474	25/7053	0.824888	0.999996	0.934709	LOC110029084	1
GO:0034050	host programmed cell death induced by symbiont	1/474	25/7053	0.824888	0.999996	0.934709	LOC110026841	1
GO:0034614	cellular response to reactive oxygen species	1/474	25/7053	0.824888	0.999996	0.934709	LOC110020089	1
GO:0034754	cellular hormone metabolic process	1/474	25/7053	0.824888	0.999996	0.934709	LOC110023168	1
GO:0043401	steroid hormone mediated signaling pathway	1/474	25/7053	0.824888	0.999996	0.934709	LOC110024792	1
GO:0071383	cellular response to steroid hormone stimulus	1/474	25/7053	0.824888	0.999996	0.934709	LOC110024792	1
GO:0140053	mitochondrial gene expression	1/474	25/7053	0.824888	0.999996	0.934709	LOC110037441	1
GO:0009123	nucleoside monophosphate metabolic process	2/474	46/7053	0.825122	0.999996	0.934709	LOC110018947/LOC110026975	2
GO:0044448	obsolete cell cortex part	2/474	46/7053	0.825122	0.999996	0.934709	LOC110032714/LOC110030709	2
GO:0048467	gynoecium development	2/474	46/7053	0.825122	0.999996	0.934709	LOC110019471/LOC110026290	2
GO:0051248	negative regulation of protein metabolic process	4/474	84/7053	0.825529	0.999996	0.934709	LOC110033294/LOC110030781/LOC110026383/LOC110036409	4
GO:0005802	trans-Golgi network	9/474	172/7053	0.826485	0.999996	0.934709	LOC110026391/LOC110039157/LOC110021641/LOC110022418/LOC110018571/LOC110036101/LOC110034390/LOC110035507/LOC110026844	9
GO:0009555	pollen development	9/474	172/7053	0.826485	0.999996	0.934709	LOC110022556/LOC110026381/LOC110039286/LOC110031047/LOC110022349/LOC110022335/LOC110027892/LOC110038424/LOC110035505	9
GO:0098662	inorganic cation transmembrane transport	8/474	155/7053	0.827291	0.999996	0.934709	LOC110023418/LOC110031303/LOC110027325/LOC110026797/LOC110035519/LOC110021182/LOC110032636/LOC110031086	8
GO:0009108	obsolete coenzyme biosynthetic process	3/474	66/7053	0.830109	0.999996	0.934709	LOC110020293/LOC110026975/LOC110018262	3
GO:0009259	ribonucleotide metabolic process	3/474	66/7053	0.830109	0.999996	0.934709	LOC110027892/LOC110018947/LOC110026975	3
GO:0009658	chloroplast organization	6/474	121/7053	0.832276	0.999996	0.934709	LOC110021308/LOC110037226/LOC110018061/LOC110018312/LOC110018089/LOC110022638	6
GO:0000989	obsolete transcription factor activity, transcription factor binding	4/474	85/7053	0.832475	0.999996	0.934709	LOC110025017/LOC110027082/LOC110022840/LOC110027885	4
GO:0004175	endopeptidase activity	4/474	85/7053	0.832475	0.999996	0.934709	LOC110036052/LOC110023451/LOC110031103/LOC110032051	4
GO:0071370	cellular response to gibberellin stimulus	2/474	47/7053	0.834206	0.999996	0.934709	LOC110039286/LOC110027885	2
GO:1902275	regulation of chromatin organization	2/474	47/7053	0.834206	0.999996	0.934709	LOC110023449/LOC110026383	2
GO:0000932	P-body	1/474	26/7053	0.836698	0.999996	0.934709	LOC110033294	1
GO:0005798	Golgi-associated vesicle	1/474	26/7053	0.836698	0.999996	0.934709	LOC110029984	1
GO:0006779	porphyrin-containing compound biosynthetic process	1/474	26/7053	0.836698	0.999996	0.934709	LOC110030709	1
GO:0009132	nucleoside diphosphate metabolic process	1/474	26/7053	0.836698	0.999996	0.934709	LOC110026975	1
GO:0009895	negative regulation of catabolic process	1/474	26/7053	0.836698	0.999996	0.934709	LOC110036409	1
GO:0010214	seed coat development	1/474	26/7053	0.836698	0.999996	0.934709	LOC110038923	1
GO:0010229	inflorescence development	1/474	26/7053	0.836698	0.999996	0.934709	LOC110019471	1
GO:0015085	calcium ion transmembrane transporter activity	1/474	26/7053	0.836698	0.999996	0.934709	LOC110027325	1
GO:0019751	polyol metabolic process	1/474	26/7053	0.836698	0.999996	0.934709	LOC110024926	1
GO:0048024	regulation of mRNA splicing, via spliceosome	1/474	26/7053	0.836698	0.999996	0.934709	LOC110036409	1
GO:0048545	response to steroid hormone	1/474	26/7053	0.836698	0.999996	0.934709	LOC110024792	1
GO:1903338	regulation of cell wall organization or biogenesis	1/474	26/7053	0.836698	0.999996	0.934709	LOC110037395	1
GO:0007010	cytoskeleton organization	8/474	157/7053	0.837626	0.999996	0.934709	LOC110020165/LOC110024030/LOC110032714/LOC110030709/LOC110017959/LOC110033421/LOC110025950/LOC110019100	8
GO:0000272	polysaccharide catabolic process	2/474	48/7053	0.842861	0.999996	0.934709	LOC110021138/LOC110028286	2
GO:0032270	positive regulation of cellular protein metabolic process	5/474	105/7053	0.84347	0.999996	0.934709	LOC110020165/LOC110024030/LOC110023449/LOC110024978/LOC110019100	5
GO:0044093	positive regulation of molecular function	6/474	123/7053	0.843585	0.999996	0.934709	LOC110020165/LOC110024030/LOC110022349/LOC110022335/LOC110038884/LOC110019100	6
GO:0006417	regulation of translation	3/474	68/7053	0.844995	0.999996	0.934709	LOC110033294/LOC110036409/LOC110024978	3
GO:0012501	programmed cell death	3/474	68/7053	0.844995	0.999996	0.934709	LOC110036052/LOC110026841/LOC110020089	3
GO:0034248	regulation of cellular amide metabolic process	3/474	68/7053	0.844995	0.999996	0.934709	LOC110033294/LOC110036409/LOC110024978	3
GO:0061024	membrane organization	4/474	87/7053	0.845678	0.999996	0.934709	LOC110039157/LOC110036101/LOC110037738/LOC110035507	4
GO:0017144	drug metabolic process	9/474	176/7053	0.845832	0.999996	0.934709	LOC110021138/LOC110021641/LOC110028286/LOC110035730/LOC110024926/LOC110031047/LOC110026975/LOC110019783/LOC110033183	9
GO:0005085	guanyl-nucleotide exchange factor activity	1/474	27/7053	0.847714	0.999996	0.934709	LOC110027595	1
GO:0006090	pyruvate metabolic process	1/474	27/7053	0.847714	0.999996	0.934709	LOC110026975	1
GO:0009166	nucleotide catabolic process	1/474	27/7053	0.847714	0.999996	0.934709	LOC110026975	1
GO:0016667	oxidoreductase activity, acting on a sulfur group of donors	1/474	27/7053	0.847714	0.999996	0.934709	LOC110017809	1
GO:0016860	intramolecular oxidoreductase activity	1/474	27/7053	0.847714	0.999996	0.934709	LOC110037031	1
GO:0032153	cell division site	1/474	27/7053	0.847714	0.999996	0.934709	LOC110032714	1
GO:0043487	regulation of RNA stability	1/474	27/7053	0.847714	0.999996	0.934709	LOC110036409	1
GO:0061025	membrane fusion	1/474	27/7053	0.847714	0.999996	0.934709	LOC110039157	1
GO:0070588	calcium ion transmembrane transport	1/474	27/7053	0.847714	0.999996	0.934709	LOC110027325	1
GO:1901981	phosphatidylinositol phosphate binding	1/474	27/7053	0.847714	0.999996	0.934709	LOC110038985	1
GO:0044429	obsolete mitochondrial part	6/474	124/7053	0.849004	0.999996	0.934709	LOC110021539/LOC110037441/LOC110037738/LOC110026841/LOC110025071/LOC110024026	6
GO:0007018	microtubule-based movement	2/474	49/7053	0.851105	0.999996	0.934709	LOC110033421/LOC110025950	2
GO:0048193	Golgi vesicle transport	2/474	49/7053	0.851105	0.999996	0.934709	LOC110030709/LOC110036101	2
GO:0030554	adenyl nucleotide binding	3/474	69/7053	0.852006	0.999996	0.934709	LOC110032714/LOC110024926/LOC110035275	3
GO:0032559	adenyl ribonucleotide binding	3/474	69/7053	0.852006	0.999996	0.934709	LOC110032714/LOC110024926/LOC110035275	3
GO:0006754	ATP biosynthetic process	1/474	28/7053	0.857987	0.999996	0.934709	LOC110026975	1
GO:0006816	calcium ion transport	1/474	28/7053	0.857987	0.999996	0.934709	LOC110027325	1
GO:0008238	exopeptidase activity	1/474	28/7053	0.857987	0.999996	0.934709	LOC110020627	1
GO:0033014	tetrapyrrole biosynthetic process	1/474	28/7053	0.857987	0.999996	0.934709	LOC110030709	1
GO:0071367	cellular response to brassinosteroid stimulus	1/474	28/7053	0.857987	0.999996	0.934709	LOC110024792	1
GO:0071806	protein transmembrane transport	1/474	28/7053	0.857987	0.999996	0.934709	LOC110033278	1
GO:0072527	pyrimidine-containing compound metabolic process	1/474	28/7053	0.857987	0.999996	0.934709	LOC110018947	1
GO:0098590	plasma membrane region	1/474	28/7053	0.857987	0.999996	0.934709	LOC110030709	1
GO:2001251	negative regulation of chromosome organization	1/474	28/7053	0.857987	0.999996	0.934709	LOC110026383	1
GO:0016052	carbohydrate catabolic process	4/474	89/7053	0.857994	0.999996	0.934709	LOC110021138/LOC110028286/LOC110037681/LOC110026975	4
GO:0006366	transcription by RNA polymerase II	3/474	70/7053	0.858739	0.999996	0.934709	LOC110033051/LOC110029376/LOC110027045	3
GO:0009260	ribonucleotide biosynthetic process	2/474	50/7053	0.858953	0.999996	0.934709	LOC110018947/LOC110026975	2
GO:0016607	nuclear speck	2/474	50/7053	0.858953	0.999996	0.934709	LOC110023449/LOC110033421	2
GO:0046390	ribose phosphate biosynthetic process	2/474	50/7053	0.858953	0.999996	0.934709	LOC110018947/LOC110026975	2
GO:0007017	microtubule-based process	6/474	126/7053	0.859383	0.999996	0.934709	LOC110020165/LOC110024030/LOC110017959/LOC110033421/LOC110025950/LOC110019100	6
GO:0051247	positive regulation of protein metabolic process	5/474	108/7053	0.860395	0.999996	0.934709	LOC110020165/LOC110024030/LOC110023449/LOC110024978/LOC110019100	5
GO:0019693	ribose phosphate metabolic process	3/474	71/7053	0.865202	0.999996	0.934709	LOC110027892/LOC110018947/LOC110026975	3
GO:0031461	cullin-RING ubiquitin ligase complex	3/474	71/7053	0.865202	0.999996	0.934709	LOC110019473/LOC110022349/LOC110022335	3
GO:0010501	RNA secondary structure unwinding	2/474	51/7053	0.866422	0.999996	0.934709	LOC110033135/LOC110031318	2
GO:0035091	phosphatidylinositol binding	2/474	51/7053	0.866422	0.999996	0.934709	LOC110038985/LOC110022005	2
GO:0045786	negative regulation of cell cycle	2/474	51/7053	0.866422	0.999996	0.934709	LOC110019989/LOC110038679	2
GO:0019359	nicotinamide nucleotide biosynthetic process	1/474	29/7053	0.86757	0.999996	0.934709	LOC110026975	1
GO:0019363	pyridine nucleotide biosynthetic process	1/474	29/7053	0.86757	0.999996	0.934709	LOC110026975	1
GO:0072525	pyridine-containing compound biosynthetic process	1/474	29/7053	0.86757	0.999996	0.934709	LOC110026975	1
GO:1901292	nucleoside phosphate catabolic process	1/474	29/7053	0.86757	0.999996	0.934709	LOC110026975	1
GO:0042440	pigment metabolic process	4/474	91/7053	0.869464	0.999996	0.934709	LOC110029484/LOC110026915/LOC110031840/LOC110019012	4
GO:0001134	obsolete transcription regulator recruiting activity	3/474	72/7053	0.871404	0.999996	0.934709	LOC110025017/LOC110022840/LOC110027885	3
GO:0001135	obsolete RNA polymerase II transcription regulator recruiting activity	3/474	72/7053	0.871404	0.999996	0.934709	LOC110025017/LOC110022840/LOC110027885	3
GO:0005216	ion channel activity	2/474	52/7053	0.873526	0.999996	0.934709	LOC110027325/LOC110026797	2
GO:0008017	microtubule binding	2/474	52/7053	0.873526	0.999996	0.934709	LOC110022191/LOC110021844	2
GO:0019827	stem cell population maintenance	2/474	52/7053	0.873526	0.999996	0.934709	LOC110021172/LOC110028362	2
GO:0098727	maintenance of cell number	2/474	52/7053	0.873526	0.999996	0.934709	LOC110021172/LOC110028362	2
GO:0044433	obsolete cytoplasmic vesicle part	4/474	92/7053	0.874895	0.999996	0.934709	LOC110018571/LOC110027506/LOC110036855/LOC110032075	4
GO:0000209	protein polyubiquitination	1/474	30/7053	0.876506	0.999996	0.934709	LOC110019484	1
GO:0000956	nuclear-transcribed mRNA catabolic process	1/474	30/7053	0.876506	0.999996	0.934709	LOC110033294	1
GO:0050684	regulation of mRNA processing	1/474	30/7053	0.876506	0.999996	0.934709	LOC110036409	1
GO:1902903	regulation of supramolecular fiber organization	1/474	30/7053	0.876506	0.999996	0.934709	LOC110036409	1
GO:0009965	leaf morphogenesis	3/474	73/7053	0.877353	0.999996	0.934709	LOC110033830/LOC110030179/LOC110035754	3
GO:0009127	purine nucleoside monophosphate biosynthetic process	1/474	31/7053	0.884841	0.999996	0.934709	LOC110026975	1
GO:0009168	purine ribonucleoside monophosphate biosynthetic process	1/474	31/7053	0.884841	0.999996	0.934709	LOC110026975	1
GO:0010075	regulation of meristem growth	1/474	31/7053	0.884841	0.999996	0.934709	LOC110028362	1
GO:0010109	regulation of photosynthesis	1/474	31/7053	0.884841	0.999996	0.934709	LOC110020107	1
GO:0015629	actin cytoskeleton	1/474	31/7053	0.884841	0.999996	0.934709	LOC110032714	1
GO:0015718	monocarboxylic acid transport	1/474	31/7053	0.884841	0.999996	0.934709	LOC110031076	1
GO:0016722	oxidoreductase activity, oxidizing metal ions	1/474	31/7053	0.884841	0.999996	0.934709	LOC110019757	1
GO:0032956	regulation of actin cytoskeleton organization	1/474	31/7053	0.884841	0.999996	0.934709	LOC110036409	1
GO:0043094	cellular metabolic compound salvage	1/474	31/7053	0.884841	0.999996	0.934709	LOC110018947	1
GO:0045333	cellular respiration	1/474	31/7053	0.884841	0.999996	0.934709	LOC110021969	1
GO:0050660	flavin adenine dinucleotide binding	1/474	31/7053	0.884841	0.999996	0.934709	LOC110036591	1
GO:0061013	regulation of mRNA catabolic process	1/474	31/7053	0.884841	0.999996	0.934709	LOC110036409	1
GO:0008092	cytoskeletal protein binding	5/474	113/7053	0.885193	0.999996	0.934709	LOC110024213/LOC110022191/LOC110032714/LOC110030709/LOC110021844	5
GO:0032940	secretion by cell	2/474	54/7053	0.886703	0.999996	0.934709	LOC110039157/LOC110030709	2
GO:0006928	movement of cell or subcellular component	3/474	75/7053	0.888523	0.999996	0.934709	LOC110033421/LOC110025950/LOC110018061	3
GO:0009145	purine nucleoside triphosphate biosynthetic process	1/474	32/7053	0.892615	0.999996	0.934709	LOC110026975	1
GO:0009201	ribonucleoside triphosphate biosynthetic process	1/474	32/7053	0.892615	0.999996	0.934709	LOC110026975	1
GO:0009206	purine ribonucleoside triphosphate biosynthetic process	1/474	32/7053	0.892615	0.999996	0.934709	LOC110026975	1
GO:0015926	glucosidase activity	1/474	32/7053	0.892615	0.999996	0.934709	LOC110037681	1
GO:0032970	regulation of actin filament-based process	1/474	32/7053	0.892615	0.999996	0.934709	LOC110036409	1
GO:0034968	histone lysine methylation	1/474	32/7053	0.892615	0.999996	0.934709	LOC110029507	1
GO:0051346	negative regulation of hydrolase activity	1/474	32/7053	0.892615	0.999996	0.934709	LOC110030781	1
GO:0051510	regulation of unidimensional cell growth	1/474	32/7053	0.892615	0.999996	0.934709	LOC110018571	1
GO:0051552	flavone metabolic process	1/474	32/7053	0.892615	0.999996	0.934709	LOC110031840	1
GO:0051553	flavone biosynthetic process	1/474	32/7053	0.892615	0.999996	0.934709	LOC110031840	1
GO:0051554	flavonol metabolic process	1/474	32/7053	0.892615	0.999996	0.934709	LOC110031840	1
GO:0051555	flavonol biosynthetic process	1/474	32/7053	0.892615	0.999996	0.934709	LOC110031840	1
GO:0098869	cellular oxidant detoxification	1/474	32/7053	0.892615	0.999996	0.934709	LOC110033183	1
GO:2001252	positive regulation of chromosome organization	1/474	32/7053	0.892615	0.999996	0.934709	LOC110023449	1
GO:0005102	signaling receptor binding	2/474	55/7053	0.892804	0.999996	0.934709	LOC110033451/LOC110036163	2
GO:1901607	alpha-amino acid biosynthetic process	2/474	55/7053	0.892804	0.999996	0.934709	LOC110022099/LOC110030067	2
GO:0007346	regulation of mitotic cell cycle	3/474	76/7053	0.893761	0.999996	0.934709	LOC110020165/LOC110024030/LOC110019100	3
GO:0035639	purine ribonucleoside triphosphate binding	3/474	76/7053	0.893761	0.999996	0.934709	LOC110032714/LOC110024926/LOC110035275	3
GO:0090626	plant epidermis morphogenesis	3/474	76/7053	0.893761	0.999996	0.934709	LOC110024910/LOC110019989/LOC110038679	3
GO:0006732	obsolete coenzyme metabolic process	4/474	96/7053	0.89471	0.999996	0.934709	LOC110027892/LOC110020293/LOC110026975/LOC110018262	4
GO:0005875	microtubule associated complex	2/474	56/7053	0.898599	0.999996	0.934709	LOC110020775/LOC110025950	2
GO:0071241	cellular response to inorganic substance	2/474	56/7053	0.898599	0.999996	0.934709	LOC110019177/LOC110028202	2
GO:0099080	supramolecular complex	3/474	77/7053	0.898776	0.999996	0.934709	LOC110030709/LOC110021844/LOC110018947	3
GO:0003779	actin binding	1/474	33/7053	0.899864	0.999996	0.934709	LOC110024213	1
GO:0005244	voltage-gated ion channel activity	1/474	33/7053	0.899864	0.999996	0.934709	LOC110026797	1
GO:0009110	vitamin biosynthetic process	1/474	33/7053	0.899864	0.999996	0.934709	LOC110019341	1
GO:0009142	nucleoside triphosphate biosynthetic process	1/474	33/7053	0.899864	0.999996	0.934709	LOC110026975	1
GO:0010091	trichome branching	1/474	33/7053	0.899864	0.999996	0.934709	LOC110024910	1
GO:0010942	positive regulation of cell death	1/474	33/7053	0.899864	0.999996	0.934709	LOC110018441	1
GO:0016236	macroautophagy	1/474	33/7053	0.899864	0.999996	0.934709	LOC110038985	1
GO:0022832	voltage-gated channel activity	1/474	33/7053	0.899864	0.999996	0.934709	LOC110026797	1
GO:0034504	protein localization to nucleus	1/474	33/7053	0.899864	0.999996	0.934709	LOC110038062	1
GO:0140014	mitotic nuclear division	1/474	33/7053	0.899864	0.999996	0.934709	LOC110025950	1
GO:1990748	cellular detoxification	1/474	33/7053	0.899864	0.999996	0.934709	LOC110033183	1
GO:0046903	secretion	2/474	57/7053	0.904102	0.999996	0.934709	LOC110039157/LOC110030709	2
GO:0007127	meiosis I	1/474	34/7053	0.906626	0.999996	0.934709	LOC110020775	1
GO:0018022	peptidyl-lysine methylation	1/474	34/7053	0.906626	0.999996	0.934709	LOC110029507	1
GO:0033612	receptor serine/threonine kinase binding	1/474	34/7053	0.906626	0.999996	0.934709	LOC110033451	1
GO:0043484	regulation of RNA splicing	1/474	34/7053	0.906626	0.999996	0.934709	LOC110036409	1
GO:0048284	organelle fusion	1/474	34/7053	0.906626	0.999996	0.934709	LOC110039157	1
GO:0060589	nucleoside-triphosphatase regulator activity	1/474	34/7053	0.906626	0.999996	0.934709	LOC110038884	1
GO:0051188	obsolete cofactor biosynthetic process	4/474	99/7053	0.907711	0.999996	0.934709	LOC110030709/LOC110020293/LOC110026975/LOC110018262	4
GO:0045944	positive regulation of transcription by RNA polymerase II	3/474	79/7053	0.908173	0.999996	0.934709	LOC110033051/LOC110029376/LOC110027045	3
GO:0051302	regulation of cell division	2/474	58/7053	0.909324	0.999996	0.934709	LOC110027506/LOC110028202	2
GO:0019866	organelle inner membrane	4/474	100/7053	0.911718	0.999996	0.934709	LOC110021539/LOC110037738/LOC110026841/LOC110025071	4
GO:0001076	obsolete transcription factor activity, RNA polymerase II transcription factor binding	3/474	80/7053	0.91257	0.999996	0.934709	LOC110025017/LOC110022840/LOC110027885	3
GO:0016651	oxidoreductase activity, acting on NAD(P)H	1/474	35/7053	0.912931	0.999996	0.934709	LOC110033183	1
GO:0016811	hydrolase activity, acting on carbon-nitrogen (but not peptide) bonds, in linear amides	1/474	35/7053	0.912931	0.999996	0.934709	LOC110029367	1
GO:0030036	actin cytoskeleton organization	1/474	35/7053	0.912931	0.999996	0.934709	LOC110032714	1
GO:0046034	ATP metabolic process	1/474	35/7053	0.912931	0.999996	0.934709	LOC110026975	1
GO:0071281	cellular response to iron ion	1/474	35/7053	0.912931	0.999996	0.934709	LOC110028202	1
GO:0090406	pollen tube	1/474	35/7053	0.912931	0.999996	0.934709	LOC110033660	1
GO:0070011	#N/A	6/474	139/7053	0.913362	0.999996	0.934709	LOC110036052/LOC110020627/LOC110023451/LOC110031103/LOC110020107/LOC110032051	6
GO:0016810	hydrolase activity, acting on carbon-nitrogen (but not peptide) bonds	2/474	59/7053	0.91428	0.999996	0.934709	LOC110029367/LOC110034469	2
GO:0097367	carbohydrate derivative binding	4/474	101/7053	0.91557	0.999996	0.934709	LOC110033064/LOC110032714/LOC110024926/LOC110035275	4
GO:0048437	floral organ development	7/474	159/7053	0.91746	0.999996	0.934709	LOC110022556/LOC110021138/LOC110028286/LOC110039286/LOC110026290/LOC110035505/LOC110027885	7
GO:0051301	cell division	7/474	159/7053	0.91746	0.999996	0.934709	LOC110032714/LOC110020274/LOC110020162/LOC110027595/LOC110022820/LOC110038062/LOC110027080	7
GO:0006766	vitamin metabolic process	1/474	36/7053	0.918812	0.999996	0.934709	LOC110019341	1
GO:0061982	meiosis I cell cycle process	1/474	36/7053	0.918812	0.999996	0.934709	LOC110020775	1
GO:0015631	tubulin binding	2/474	60/7053	0.918981	0.999996	0.934709	LOC110022191/LOC110021844	2
GO:0051020	GTPase binding	2/474	60/7053	0.918981	0.999996	0.934709	LOC110027595/LOC110019804	2
GO:1901605	alpha-amino acid metabolic process	3/474	82/7053	0.920794	0.999996	0.934709	LOC110022099/LOC110030067/LOC110019341	3
GO:0022412	cellular process involved in reproduction in multicellular organism	2/474	61/7053	0.923439	0.999996	0.934709	LOC110019484/LOC110035507	2
GO:0050662	obsolete coenzyme binding	2/474	61/7053	0.923439	0.999996	0.934709	LOC110036591/LOC110017804	2
GO:0002218	activation of innate immune response	1/474	37/7053	0.924296	0.999996	0.934709	LOC110036650	1
GO:0006402	mRNA catabolic process	1/474	37/7053	0.924296	0.999996	0.934709	LOC110033294	1
GO:0008283	cell population proliferation	1/474	37/7053	0.924296	0.999996	0.934709	LOC110019471	1
GO:0045814	negative regulation of gene expression, epigenetic	1/474	37/7053	0.924296	0.999996	0.934709	LOC110023449	1
GO:0048440	carpel development	1/474	37/7053	0.924296	0.999996	0.934709	LOC110026290	1
GO:0051130	positive regulation of cellular component organization	3/474	83/7053	0.924635	0.999996	0.934709	LOC110030709/LOC110023449/LOC110036409	3
GO:0009150	purine ribonucleotide metabolic process	2/474	62/7053	0.927666	0.999996	0.934709	LOC110027892/LOC110026975	2
GO:0017076	purine nucleotide binding	3/474	84/7053	0.928306	0.999996	0.934709	LOC110032714/LOC110024926/LOC110035275	3
GO:0032555	purine ribonucleotide binding	3/474	84/7053	0.928306	0.999996	0.934709	LOC110032714/LOC110024926/LOC110035275	3
GO:0003712	transcription coregulator activity	1/474	38/7053	0.929411	0.999996	0.934709	LOC110026020	1
GO:0006914	autophagy	1/474	38/7053	0.929411	0.999996	0.934709	LOC110038985	1
GO:0009926	auxin polar transport	1/474	38/7053	0.929411	0.999996	0.934709	LOC110033792	1
GO:0022839	ion gated channel activity	1/474	38/7053	0.929411	0.999996	0.934709	LOC110026797	1
GO:0031301	integral component of organelle membrane	1/474	38/7053	0.929411	0.999996	0.934709	LOC110026391	1
GO:0042393	histone binding	1/474	38/7053	0.929411	0.999996	0.934709	LOC110023449	1
GO:0051493	regulation of cytoskeleton organization	1/474	38/7053	0.929411	0.999996	0.934709	LOC110036409	1
GO:0061919	process utilizing autophagic mechanism	1/474	38/7053	0.929411	0.999996	0.934709	LOC110038985	1
GO:0048609	multicellular organismal reproductive process	4/474	105/7053	0.929519	0.999996	0.934709	LOC110022556/LOC110037226/LOC110035791/LOC110035505	4
GO:0006163	purine nucleotide metabolic process	2/474	63/7053	0.931671	0.999996	0.934709	LOC110027892/LOC110026975	2
GO:0070925	organelle assembly	3/474	85/7053	0.931812	0.999996	0.934709	LOC110017959/LOC110033421/LOC110038985	3
GO:0040008	regulation of growth	8/474	183/7053	0.932198	0.999996	0.934709	LOC110036163/LOC110032336/LOC110018571/LOC110036855/LOC110019989/LOC110028362/LOC110038679/LOC110028013	8
GO:0003777	microtubule motor activity	1/474	39/7053	0.934181	0.999996	0.934709	LOC110025950	1
GO:0005871	kinesin complex	1/474	39/7053	0.934181	0.999996	0.934709	LOC110025950	1
GO:0009126	purine nucleoside monophosphate metabolic process	1/474	39/7053	0.934181	0.999996	0.934709	LOC110026975	1
GO:0009167	purine ribonucleoside monophosphate metabolic process	1/474	39/7053	0.934181	0.999996	0.934709	LOC110026975	1
GO:0009846	pollen germination	1/474	39/7053	0.934181	0.999996	0.934709	LOC110034009	1
GO:0019362	pyridine nucleotide metabolic process	1/474	39/7053	0.934181	0.999996	0.934709	LOC110026975	1
GO:0019867	outer membrane	1/474	39/7053	0.934181	0.999996	0.934709	LOC110026841	1
GO:0031300	intrinsic component of organelle membrane	1/474	39/7053	0.934181	0.999996	0.934709	LOC110026391	1
GO:0031968	organelle outer membrane	1/474	39/7053	0.934181	0.999996	0.934709	LOC110026841	1
GO:0046496	nicotinamide nucleotide metabolic process	1/474	39/7053	0.934181	0.999996	0.934709	LOC110026975	1
GO:0072524	pyridine-containing compound metabolic process	1/474	39/7053	0.934181	0.999996	0.934709	LOC110026975	1
GO:2000243	positive regulation of reproductive process	1/474	39/7053	0.934181	0.999996	0.934709	LOC110035791	1
GO:0000151	ubiquitin ligase complex	3/474	86/7053	0.93516	0.999996	0.934709	LOC110019473/LOC110022349/LOC110022335	3
GO:0009914	hormone transport	2/474	64/7053	0.935467	0.999996	0.934709	LOC110033792/LOC110020599	2
GO:0002253	activation of immune response	1/474	40/7053	0.938629	0.999996	0.934709	LOC110036650	1
GO:0009199	ribonucleoside triphosphate metabolic process	1/474	40/7053	0.938629	0.999996	0.934709	LOC110026975	1
GO:0009205	purine ribonucleoside triphosphate metabolic process	1/474	40/7053	0.938629	0.999996	0.934709	LOC110026975	1
GO:0051345	positive regulation of hydrolase activity	1/474	40/7053	0.938629	0.999996	0.934709	LOC110038884	1
GO:2000377	regulation of reactive oxygen species metabolic process	1/474	40/7053	0.938629	0.999996	0.934709	LOC110031670	1
GO:0004553	hydrolase activity, hydrolyzing O-glycosyl compounds	5/474	129/7053	0.940817	0.999996	0.934709	LOC110028048/LOC110030612/LOC110037681/LOC110039058/LOC110018958	5
GO:0006518	peptide metabolic process	5/474	129/7053	0.940817	0.999996	0.934709	LOC110034648/LOC110035233/LOC110028873/LOC110028872/LOC110023027	5
GO:0009657	plastid organization	6/474	149/7053	0.941675	0.999996	0.934709	LOC110021308/LOC110037226/LOC110018061/LOC110018312/LOC110018089/LOC110022638	6
GO:0045229	external encapsulating structure organization	6/474	149/7053	0.941675	0.999996	0.934709	LOC110028691/LOC110021641/LOC110035730/LOC110026381/LOC110027892/LOC110038424	6
GO:0006364	rRNA processing	2/474	66/7053	0.942467	0.999996	0.934709	LOC110029040/LOC110034502	2
GO:0008652	cellular amino acid biosynthetic process	2/474	66/7053	0.942467	0.999996	0.934709	LOC110022099/LOC110030067	2
GO:0009165	nucleotide biosynthetic process	2/474	66/7053	0.942467	0.999996	0.934709	LOC110018947/LOC110026975	2
GO:1901293	nucleoside phosphate biosynthetic process	2/474	66/7053	0.942467	0.999996	0.934709	LOC110018947/LOC110026975	2
GO:0004540	ribonuclease activity	1/474	41/7053	0.942777	0.999996	0.934709	LOC110033294	1
GO:0009144	purine nucleoside triphosphate metabolic process	1/474	41/7053	0.942777	0.999996	0.934709	LOC110026975	1
GO:0010928	regulation of auxin mediated signaling pathway	1/474	41/7053	0.942777	0.999996	0.934709	LOC110033792	1
GO:0044089	positive regulation of cellular component biogenesis	1/474	41/7053	0.942777	0.999996	0.934709	LOC110036409	1
GO:0006605	protein targeting	2/474	67/7053	0.94569	0.999996	0.934709	LOC110039157/LOC110035275	2
GO:0051640	organelle localization	2/474	67/7053	0.94569	0.999996	0.934709	LOC110039157/LOC110018061	2
GO:0005996	monosaccharide metabolic process	1/474	42/7053	0.946645	0.999996	0.934709	LOC110034390	1
GO:0006897	endocytosis	1/474	42/7053	0.946645	0.999996	0.934709	LOC110028691	1
GO:0042545	cell wall modification	1/474	42/7053	0.946645	0.999996	0.934709	LOC110028691	1
GO:0044038	cell wall macromolecule biosynthetic process	1/474	42/7053	0.946645	0.999996	0.934709	LOC110021641	1
GO:0060284	regulation of cell development	1/474	42/7053	0.946645	0.999996	0.934709	LOC110036409	1
GO:0070589	cellular component macromolecule biosynthetic process	1/474	42/7053	0.946645	0.999996	0.934709	LOC110021641	1
GO:0070592	cell wall polysaccharide biosynthetic process	1/474	42/7053	0.946645	0.999996	0.934709	LOC110021641	1
GO:0042170	plastid membrane	2/474	68/7053	0.948742	0.999996	0.934709	LOC110024026/LOC110031118	2
GO:0044087	regulation of cellular component biogenesis	3/474	91/7053	0.949737	0.999996	0.934709	LOC110037395/LOC110036409/LOC110021308	3
GO:0003774	motor activity	1/474	43/7053	0.950252	0.999996	0.934709	LOC110025950	1
GO:0009141	nucleoside triphosphate metabolic process	1/474	43/7053	0.950252	0.999996	0.934709	LOC110026975	1
GO:0017016	Ras GTPase binding	1/474	43/7053	0.950252	0.999996	0.934709	LOC110027595	1
GO:0031267	small GTPase binding	1/474	43/7053	0.950252	0.999996	0.934709	LOC110027595	1
GO:0098798	mitochondrial protein complex	1/474	43/7053	0.950252	0.999996	0.934709	LOC110037441	1
GO:0032553	ribonucleotide binding	3/474	92/7053	0.952259	0.999996	0.934709	LOC110032714/LOC110024926/LOC110035275	3
GO:0000166	nucleotide binding	5/474	134/7053	0.952381	0.999996	0.934709	LOC110032714/LOC110024926/LOC110036591/LOC110035275/LOC110017804	5
GO:0003690	double-stranded DNA binding	5/474	134/7053	0.952381	0.999996	0.934709	LOC110033051/LOC110026290/LOC110029376/LOC110027045/LOC110026323	5
GO:1901265	nucleoside phosphate binding	5/474	134/7053	0.952381	0.999996	0.934709	LOC110032714/LOC110024926/LOC110036591/LOC110035275/LOC110017804	5
GO:0008233	peptidase activity	6/474	154/7053	0.952472	0.999996	0.934709	LOC110036052/LOC110020627/LOC110023451/LOC110031103/LOC110020107/LOC110032051	6
GO:0006261	DNA-dependent DNA replication	1/474	44/7053	0.953616	0.999996	0.934709	LOC110019471	1
GO:0019898	extrinsic component of membrane	1/474	44/7053	0.953616	0.999996	0.934709	LOC110038985	1
GO:0036464	cytoplasmic ribonucleoprotein granule	1/474	44/7053	0.953616	0.999996	0.934709	LOC110033294	1
GO:0051726	regulation of cell cycle	6/474	156/7053	0.956262	0.999996	0.934709	LOC110020165/LOC110024030/LOC110023020/LOC110019989/LOC110038679/LOC110019100	6
GO:0035770	ribonucleoprotein granule	1/474	45/7053	0.956753	0.999996	0.934709	LOC110033294	1
GO:0015931	nucleobase-containing compound transport	2/474	71/7053	0.956946	0.999996	0.934709	LOC110037738/LOC110020599	2
GO:0016072	rRNA metabolic process	2/474	71/7053	0.956946	0.999996	0.934709	LOC110029040/LOC110034502	2
GO:0044262	cellular carbohydrate metabolic process	8/474	196/7053	0.958093	0.999996	0.934709	LOC110027083/LOC110021707/LOC110027413/LOC110021641/LOC110029837/LOC110035746/LOC110037681/LOC110026975	8
GO:0000911	cytokinesis by cell plate formation	1/474	46/7053	0.959678	0.999996	0.934709	LOC110027595	1
GO:0006164	purine nucleotide biosynthetic process	1/474	46/7053	0.959678	0.999996	0.934709	LOC110026975	1
GO:0009152	purine ribonucleotide biosynthetic process	1/474	46/7053	0.959678	0.999996	0.934709	LOC110026975	1
GO:0043254	regulation of protein-containing complex assembly	1/474	46/7053	0.959678	0.999996	0.934709	LOC110021308	1
GO:0045927	positive regulation of growth	1/474	46/7053	0.959678	0.999996	0.934709	LOC110028013	1
GO:1902410	mitotic cytokinetic process	1/474	46/7053	0.959678	0.999996	0.934709	LOC110027595	1
GO:0036094	small molecule binding	8/474	198/7053	0.961175	0.999996	0.934709	LOC110032486/LOC110030781/LOC110032714/LOC110024926/LOC110036591/LOC110035275/LOC110017804/LOC110027492	8
GO:0005635	nuclear envelope	2/474	73/7053	0.961701	0.999996	0.934709	LOC110032088/LOC110032089	2
GO:0099081	supramolecular polymer	2/474	73/7053	0.961701	0.999996	0.934709	LOC110030709/LOC110021844	2
GO:0099512	supramolecular fiber	2/474	73/7053	0.961701	0.999996	0.934709	LOC110030709/LOC110021844	2
GO:0044430	obsolete cytoskeletal part	7/474	179/7053	0.961785	0.999996	0.934709	LOC110022191/LOC110032714/LOC110020775/LOC110021844/LOC110017959/LOC110033421/LOC110025950	7
GO:0006401	RNA catabolic process	1/474	47/7053	0.962405	0.999996	0.934709	LOC110033294	1
GO:0008047	enzyme activator activity	1/474	47/7053	0.962405	0.999996	0.934709	LOC110038884	1
GO:0016571	histone methylation	1/474	47/7053	0.962405	0.999996	0.934709	LOC110029507	1
GO:0032506	cytokinetic process	1/474	47/7053	0.962405	0.999996	0.934709	LOC110027595	1
GO:0045089	positive regulation of innate immune response	1/474	47/7053	0.962405	0.999996	0.934709	LOC110036650	1
GO:0046434	organophosphate catabolic process	1/474	47/7053	0.962405	0.999996	0.934709	LOC110026975	1
GO:0097237	cellular response to toxic substance	1/474	47/7053	0.962405	0.999996	0.934709	LOC110033183	1
GO:0004004	#N/A	2/474	74/7053	0.963885	0.999996	0.934709	LOC110033135/LOC110031318	2
GO:0008186	RNA-dependent ATPase activity	2/474	74/7053	0.963885	0.999996	0.934709	LOC110033135/LOC110031318	2
GO:0010564	regulation of cell cycle process	2/474	74/7053	0.963885	0.999996	0.934709	LOC110019989/LOC110038679	2
GO:0044036	cell wall macromolecule metabolic process	2/474	74/7053	0.963885	0.999996	0.934709	LOC110021641/LOC110029610	2
GO:0043621	protein self-association	1/474	48/7053	0.964949	0.999996	0.934709	LOC110027150	1
GO:0071248	cellular response to metal ion	1/474	48/7053	0.964949	0.999996	0.934709	LOC110028202	1
GO:0003724	RNA helicase activity	2/474	75/7053	0.96595	0.999996	0.934709	LOC110033135/LOC110031318	2
GO:0033044	regulation of chromosome organization	2/474	75/7053	0.96595	0.999996	0.934709	LOC110023449/LOC110026383	2
GO:0051336	regulation of hydrolase activity	2/474	75/7053	0.96595	0.999996	0.934709	LOC110030781/LOC110038884	2
GO:0016798	hydrolase activity, acting on glycosyl bonds	5/474	142/7053	0.966678	0.999996	0.934709	LOC110028048/LOC110030612/LOC110037681/LOC110039058/LOC110018958	5
GO:0000271	polysaccharide biosynthetic process	3/474	99/7053	0.96687	0.999996	0.934709	LOC110027083/LOC110026137/LOC110021641	3
GO:0044403	symbiotic process	1/474	49/7053	0.967321	0.999996	0.934709	LOC110031318	1
GO:0051656	establishment of organelle localization	1/474	49/7053	0.967321	0.999996	0.934709	LOC110018061	1
GO:0043603	cellular amide metabolic process	6/474	163/7053	0.967469	0.999996	0.934709	LOC110034648/LOC110035233/LOC110028873/LOC110028872/LOC110023027/LOC110027892	6
GO:0016779	nucleotidyltransferase activity	1/474	50/7053	0.969532	0.999996	0.934709	LOC110037441	1
GO:0016835	carbon-oxygen lyase activity	1/474	50/7053	0.969532	0.999996	0.934709	LOC110032486	1
GO:0098813	nuclear chromosome segregation	1/474	50/7053	0.969532	0.999996	0.934709	LOC110025950	1
GO:0072521	purine-containing compound metabolic process	2/474	77/7053	0.969744	0.999996	0.934709	LOC110027892/LOC110026975	2
GO:0005198	structural molecule activity	3/474	101/7053	0.970199	0.999996	0.934709	LOC110027985/LOC110030709/LOC110026007	3
GO:0016604	nuclear body	2/474	78/7053	0.971485	0.999996	0.934709	LOC110023449/LOC110033421	2
GO:0006479	protein methylation	1/474	51/7053	0.971595	0.999996	0.934709	LOC110029507	1
GO:0008213	protein alkylation	1/474	51/7053	0.971595	0.999996	0.934709	LOC110029507	1
GO:0009100	glycoprotein metabolic process	1/474	51/7053	0.971595	0.999996	0.934709	LOC110018958	1
GO:0072522	purine-containing compound biosynthetic process	1/474	51/7053	0.971595	0.999996	0.934709	LOC110026975	1
GO:0006753	nucleoside phosphate metabolic process	3/474	102/7053	0.971742	0.999996	0.934709	LOC110027892/LOC110018947/LOC110026975	3
GO:0009117	nucleotide metabolic process	3/474	102/7053	0.971742	0.999996	0.934709	LOC110027892/LOC110018947/LOC110026975	3
GO:0016853	isomerase activity	2/474	79/7053	0.97313	0.999996	0.934709	LOC110037031/LOC110034390	2
GO:0010639	negative regulation of organelle organization	1/474	52/7053	0.973517	0.999996	0.934709	LOC110026383	1
GO:0022604	regulation of cell morphogenesis	1/474	52/7053	0.973517	0.999996	0.934709	LOC110018571	1
GO:0140013	meiotic nuclear division	1/474	52/7053	0.973517	0.999996	0.934709	LOC110020775	1
GO:0005976	polysaccharide metabolic process	6/474	169/7053	0.974914	0.999996	0.934709	LOC110027083/LOC110026137/LOC110021138/LOC110021641/LOC110028286/LOC110035730	6
GO:0000428	DNA-directed RNA polymerase complex	1/474	53/7053	0.97531	0.999996	0.934709	LOC110037441	1
GO:0007033	vacuole organization	1/474	53/7053	0.97531	0.999996	0.934709	LOC110038985	1
GO:0009250	glucan biosynthetic process	1/474	53/7053	0.97531	0.999996	0.934709	LOC110027083	1
GO:0030880	RNA polymerase complex	1/474	53/7053	0.97531	0.999996	0.934709	LOC110037441	1
GO:0044275	cellular carbohydrate catabolic process	1/474	53/7053	0.97531	0.999996	0.934709	LOC110037681	1
GO:0044419	interspecies interaction between organisms	1/474	53/7053	0.97531	0.999996	0.934709	LOC110031318	1
GO:0070085	glycosylation	1/474	53/7053	0.97531	0.999996	0.934709	LOC110026391	1
GO:0034655	nucleobase-containing compound catabolic process	2/474	81/7053	0.976149	0.999996	0.934709	LOC110033294/LOC110026975	2
GO:0050778	positive regulation of immune response	1/474	54/7053	0.976982	0.999996	0.934709	LOC110036650	1
GO:0000325	plant-type vacuole	3/474	106/7053	0.977191	0.999996	0.934709	LOC110018571/LOC110018535/LOC110033880	3
GO:0000280	nuclear division	2/474	82/7053	0.977533	0.999996	0.934709	LOC110020775/LOC110025950	2
GO:0043414	macromolecule methylation	3/474	107/7053	0.978388	0.999996	0.934709	LOC110029507/LOC110029040/LOC110034502	3
GO:0007059	chromosome segregation	1/474	55/7053	0.978541	0.999996	0.934709	LOC110025950	1
GO:0008270	zinc ion binding	1/474	55/7053	0.978541	0.999996	0.934709	LOC110033897	1
GO:0060918	auxin transport	1/474	56/7053	0.979995	0.999996	0.934709	LOC110033792	1
GO:0002684	positive regulation of immune system process	1/474	57/7053	0.98135	0.999996	0.934709	LOC110036650	1
GO:0006260	DNA replication	1/474	57/7053	0.98135	0.999996	0.934709	LOC110019471	1
GO:1903311	regulation of mRNA metabolic process	1/474	57/7053	0.98135	0.999996	0.934709	LOC110036409	1
GO:0090407	organophosphate biosynthetic process	3/474	110/7053	0.981631	0.999996	0.934709	LOC110024926/LOC110018947/LOC110026975	3
GO:0044877	protein-containing complex binding	2/474	86/7053	0.982331	0.999996	0.934709	LOC110024213/LOC110033421	2
GO:0045595	regulation of cell differentiation	2/474	86/7053	0.982331	0.999996	0.934709	LOC110028166/LOC110036409	2
GO:0008026	#N/A	2/474	87/7053	0.983366	0.999996	0.934709	LOC110033135/LOC110031318	2
GO:0070035	obsolete purine NTP-dependent helicase activity	2/474	87/7053	0.983366	0.999996	0.934709	LOC110033135/LOC110031318	2
GO:0006310	DNA recombination	1/474	59/7053	0.983792	0.999996	0.934709	LOC110020775	1
GO:0046486	glycerolipid metabolic process	1/474	59/7053	0.983792	0.999996	0.934709	LOC110027014	1
GO:0033692	cellular polysaccharide biosynthetic process	2/474	88/7053	0.984342	0.999996	0.934709	LOC110027083/LOC110021641	2
GO:0007034	vacuolar transport	1/474	60/7053	0.98489	0.999996	0.934709	LOC110032914	1
GO:0031969	chloroplast membrane	1/474	60/7053	0.98489	0.999996	0.934709	LOC110031118	1
GO:0046914	transition metal ion binding	3/474	114/7053	0.98524	0.999996	0.934709	LOC110033897/LOC110037731/LOC110037859	3
GO:0000281	mitotic cytokinesis	2/474	89/7053	0.985262	0.999996	0.934709	LOC110032714/LOC110027595	2
GO:0010383	cell wall polysaccharide metabolic process	1/474	61/7053	0.985914	0.999996	0.934709	LOC110021641	1
GO:0010073	meristem maintenance	2/474	90/7053	0.986129	0.999996	0.934709	LOC110021172/LOC110028362	2
GO:0048638	regulation of developmental growth	3/474	116/7053	0.986779	0.999996	0.934709	LOC110018571/LOC110036855/LOC110028362	3
GO:0090501	RNA phosphodiester bond hydrolysis	1/474	62/7053	0.986869	0.999996	0.934709	LOC110033294	1
GO:1903047	mitotic cell cycle process	4/474	140/7053	0.98716	0.999996	0.934709	LOC110029507/LOC110032714/LOC110027595/LOC110025950	4
GO:0004386	helicase activity	2/474	92/7053	0.987718	0.999996	0.934709	LOC110033135/LOC110031318	2
GO:0016570	histone modification	2/474	92/7053	0.987718	0.999996	0.934709	LOC110029507/LOC110026383	2
GO:0005874	microtubule	1/474	63/7053	0.987759	0.999996	0.934709	LOC110021844	1
GO:0009705	plant-type vacuole membrane	1/474	64/7053	0.98859	0.999996	0.934709	LOC110018571	1
GO:0051129	negative regulation of cellular component organization	1/474	64/7053	0.98859	0.999996	0.934709	LOC110026383	1
GO:0140098	catalytic activity, acting on RNA	6/474	187/7053	0.988848	0.999996	0.934709	LOC110033294/LOC110029040/LOC110037441/LOC110034502/LOC110033135/LOC110031318	6
GO:0015630	microtubule cytoskeleton	4/474	144/7053	0.989553	0.999996	0.934709	LOC110022191/LOC110020775/LOC110021844/LOC110025950	4
GO:0009664	plant-type cell wall organization	2/474	95/7053	0.989774	0.999996	0.934709	LOC110021641/LOC110035730	2
GO:0016569	covalent chromatin modification	2/474	95/7053	0.989774	0.999996	0.934709	LOC110029507/LOC110026383	2
GO:0061640	cytoskeleton-dependent cytokinesis	2/474	95/7053	0.989774	0.999996	0.934709	LOC110032714/LOC110027595	2
GO:0071555	cell wall organization	3/474	121/7053	0.989983	0.999996	0.934709	LOC110028691/LOC110021641/LOC110035730	3
GO:0099513	polymeric cytoskeletal fiber	1/474	66/7053	0.990085	0.999996	0.934709	LOC110021844	1
GO:0000910	cytokinesis	2/474	96/7053	0.990382	0.999996	0.934709	LOC110032714/LOC110027595	2
GO:0010608	posttranscriptional regulation of gene expression	3/474	122/7053	0.990527	0.999996	0.934709	LOC110033294/LOC110036409/LOC110024978	3
GO:0048507	meristem development	3/474	123/7053	0.991043	0.999996	0.934709	LOC110021172/LOC110018571/LOC110028362	3
GO:0055086	nucleobase-containing small molecule metabolic process	4/474	148/7053	0.991518	0.999996	0.934709	LOC110035730/LOC110027892/LOC110018947/LOC110026975	4
GO:0000278	mitotic cell cycle	4/474	149/7053	0.991951	0.999996	0.934709	LOC110029507/LOC110032714/LOC110027595/LOC110025950	4
GO:0016192	vesicle-mediated transport	6/474	194/7053	0.991957	0.999996	0.934709	LOC110028691/LOC110039157/LOC110018571/LOC110030709/LOC110036101/LOC110032914	6
GO:0061695	transferase complex, transferring phosphorus-containing groups	1/474	69/7053	0.991969	0.999996	0.934709	LOC110037441	1
GO:0044270	cellular nitrogen compound catabolic process	2/474	100/7053	0.992479	0.999996	0.934709	LOC110033294/LOC110026975	2
GO:0034622	cellular protein-containing complex assembly	4/474	151/7053	0.992754	0.999996	0.934709	LOC110033278/LOC110026841/LOC110033421/LOC110021308	4
GO:1901137	carbohydrate derivative biosynthetic process	4/474	151/7053	0.992754	0.999996	0.934709	LOC110035730/LOC110035006/LOC110018947/LOC110026975	4
GO:0040029	regulation of gene expression, epigenetic	2/474	102/7053	0.993353	0.999996	0.934709	LOC110023449/LOC110026383	2
GO:0042254	ribosome biogenesis	2/474	102/7053	0.993353	0.999996	0.934709	LOC110029040/LOC110034502	2
GO:0046700	heterocycle catabolic process	2/474	103/7053	0.993752	0.999996	0.934709	LOC110033294/LOC110026975	2
GO:0000377	RNA splicing, via transesterification reactions with bulged adenosine as nucleophile	1/474	73/7053	0.993938	0.999996	0.934709	LOC110031318	1
GO:0006520	cellular amino acid metabolic process	3/474	131/7053	0.994299	0.999996	0.934709	LOC110022099/LOC110030067/LOC110019341	3
GO:0000375	RNA splicing, via transesterification reactions	1/474	74/7053	0.994349	0.999996	0.934709	LOC110031318	1
GO:0018205	peptidyl-lysine modification	1/474	74/7053	0.994349	0.999996	0.934709	LOC110029507	1
GO:1901699	cellular response to nitrogen compound	1/474	75/7053	0.994733	0.999996	0.934709	LOC110033064	1
GO:0022603	regulation of anatomical structure morphogenesis	2/474	108/7053	0.99542	0.999996	0.934709	LOC110018571/LOC110036409	2
GO:1903046	meiotic cell cycle process	1/474	77/7053	0.995424	0.999996	0.934709	LOC110020775	1
GO:0048285	organelle fission	2/474	109/7053	0.995697	0.999996	0.934709	LOC110020775/LOC110025950	2
GO:0033043	regulation of organelle organization	4/474	162/7053	0.995968	0.999996	0.934709	LOC110030709/LOC110023449/LOC110026383/LOC110036409	4
GO:0051321	meiotic cell cycle	1/474	81/7053	0.996547	0.999996	0.934709	LOC110020775	1
GO:0000785	chromatin	1/474	86/7053	0.997572	0.999996	0.934709	LOC110026383	1
GO:0034470	ncRNA processing	2/474	119/7053	0.997703	0.999996	0.934709	LOC110029040/LOC110034502	2
GO:0098796	membrane protein complex	2/474	119/7053	0.997703	0.999996	0.934709	LOC110039157/LOC110031670	2
GO:0042546	cell wall biogenesis	2/474	123/7053	0.998217	0.999996	0.934709	LOC110021641/LOC110027595	2
GO:0044454	obsolete nuclear chromosome part	1/474	92/7053	0.998409	0.999996	0.934709	LOC110020775	1
GO:0015031	protein transport	4/474	180/7053	0.998496	0.999996	0.934709	LOC110039157/LOC110033278/LOC110018571/LOC110035275	4
GO:0022613	ribonucleoprotein complex biogenesis	2/474	127/7053	0.998617	0.999996	0.934709	LOC110029040/LOC110034502	2
GO:0000228	nuclear chromosome	1/474	95/7053	0.998713	0.999996	0.934709	LOC110020775	1
GO:0033365	protein localization to organelle	2/474	129/7053	0.998782	0.999996	0.934709	LOC110038062/LOC110035275	2
GO:0006073	cellular glucan metabolic process	1/474	96/7053	0.9988	0.999996	0.934709	LOC110027083	1
GO:0044042	glucan metabolic process	1/474	97/7053	0.998882	0.999996	0.934709	LOC110027083	1
GO:0010941	regulation of cell death	1/474	98/7053	0.998958	0.999996	0.934709	LOC110018441	1
GO:0019637	organophosphate metabolic process	4/474	188/7053	0.999039	0.999996	0.934709	LOC110024926/LOC110027892/LOC110018947/LOC110026975	4
GO:0008380	RNA splicing	1/474	101/7053	0.999157	0.999996	0.934709	LOC110031318	1
GO:0045184	establishment of protein localization	4/474	191/7053	0.999188	0.999996	0.934709	LOC110039157/LOC110033278/LOC110018571/LOC110035275	4
GO:0072594	establishment of protein localization to organelle	1/474	102/7053	0.999215	0.999996	0.934709	LOC110035275	1
GO:0009832	plant-type cell wall biogenesis	1/474	103/7053	0.999268	0.999996	0.934709	LOC110021641	1
GO:0016071	mRNA metabolic process	4/474	196/7053	0.999389	0.999996	0.934709	LOC110033294/LOC110036409/LOC110018202/LOC110022430	4
GO:0044264	cellular polysaccharide metabolic process	2/474	140/7053	0.999398	0.999996	0.934709	LOC110027083/LOC110021641	2
GO:1990234	transferase complex	4/474	200/7053	0.999514	0.999996	0.934709	LOC110037441/LOC110019473/LOC110022349/LOC110022335	4
GO:0071669	plant-type cell wall organization or biogenesis	3/474	174/7053	0.999546	0.999996	0.934709	LOC110026391/LOC110021641/LOC110035730	3
GO:0034660	ncRNA metabolic process	2/474	146/7053	0.999591	0.999996	0.934709	LOC110029040/LOC110034502	2
GO:0005694	chromosome	3/474	178/7053	0.999643	0.999996	0.934709	LOC110020775/LOC110026383/LOC110032746	3
GO:0044427	obsolete chromosomal part	2/474	149/7053	0.999663	0.999996	0.934709	LOC110020775/LOC110026383	2
GO:0006397	mRNA processing	1/474	114/7053	0.999664	0.999996	0.934709	LOC110036409	1
GO:0044703	multi-organism reproductive process	1/474	117/7053	0.999728	0.999996	0.934709	LOC110032336	1
GO:0006325	chromatin organization	2/474	159/7053	0.999824	0.999996	0.934709	LOC110029507/LOC110026383	2
GO:0044451	obsolete nucleoplasm part	3/474	191/7053	0.999839	0.999996	0.934709	LOC110023449/LOC110033421/LOC110022638	3
GO:0006886	intracellular protein transport	2/474	161/7053	0.999846	0.999996	0.934709	LOC110039157/LOC110035275	2
GO:0003729	mRNA binding	2/474	187/7053	0.999972	0.999996	0.934709	LOC110037414/LOC110036409	2
GO:0006974	cellular response to DNA damage stimulus	1/474	177/7053	0.999996	0.999996	0.934709	LOC110036409	1

## Sheet: KEGG
Table S5 The KEGG pathway of DEGs
#Term	Database	ID	Input number	Background number	P-Value	Corrected P-Value	Input
Biosynthesis of secondary metabolites	KEGG PATHWAY	peq01110	359	964	1.37831e-23	1.04752e-21	LOC110022556::NW_018164639.1:649200-649437|LOC110036944::NW_018231831.1:16904-17198|LOC110028987::NW_018164980.1:1285718-1286325|LOC110033248::NW_018165555.1:679270-679347|LOC110033053::NW_018165520.1:921394-921554|LOC110033248::NW_018165555.1:677151-677253|LOC110018548::NW_018164466.1:1389282-1389637|LOC110031586::NW_018165280.1:2811574-2811656|LOC110019525::NW_018164503.1:1481970-1482225|LOC110…
Metabolic pathways	KEGG PATHWAY	peq01100	581	1920	6.60944e-20	2.51159e-18	LOC110022556::NW_018164639.1:649200-649437|LOC110036198::NW_018223260.1:28449-28804|LOC110029425::NW_018165012.1:702881-703035|LOC110036944::NW_018231831.1:16904-17198|LOC110033248::NW_018165555.1:679270-679347|LOC110033183::NW_018165550.1:187797-187868|LOC110033053::NW_018165520.1:921394-921554|LOC110034845::NW_018213884.1:532-1051|LOC110025102::NW_018164730.1:232111-232220|LOC110018548::NW_0181…
Phenylpropanoid biosynthesis	KEGG PATHWAY	peq00940	96	142	1.69331e-18	4.28972e-17	LOC110018262::NW_018164448.1:1863316-1864603|LOC110026381::NW_018164811.1:767864-768006|LOC110033248::NW_018165555.1:678731-678986|LOC110019312::NW_018164496.1:1810348-1810485|LOC110033248::NW_018165555.1:679270-679347|LOC110023518::NW_018164666.1:5793813-5793892|LOC110029018::NW_018164444.1:74619823-74619927|LOC110023518::NW_018164666.1:5794018-5794162|LOC110033248::NW_018165555.1:677151-677253|…
Starch and sucrose metabolism	KEGG PATHWAY	peq00500	83	120	1.32829e-16	2.52375e-15	LOC110033248::NW_018165555.1:676966-677074|LOC110038456::NW_018250859.1:70639-70869|LOC110024203::NW_018164693.1:2286898-2287665|LOC110033248::NW_018165555.1:679116-679166|LOC110019525::NW_018164503.1:1485038-1485146|LOC110033248::NW_018165555.1:690152-690391|LOC110033248::NW_018165555.1:676393-676844|LOC110035746::NW_018219449.1:12147-12420|LOC110038456::NW_018250859.1:62256-62561|LOC110024203::…
alpha-Linolenic acid metabolism	KEGG PATHWAY	peq00592	53	55	4.89719e-15	7.44372e-14	LOC110022556::NW_018164639.1:649200-649437|LOC110022556::NW_018164639.1:646881-647147|LOC110022556::NW_018164639.1:647298-647593|LOC110027503::NW_018164869.1:1420377-1420673|LOC110036060::NW_018221808.1:82147-82223|LOC110027503::NW_018164869.1:1419659-1420068|LOC110022556::NW_018164639.1:648395-648718|LOC110036060::NW_018221808.1:60102-60210|LOC110025378::NW_018164739.1:2997155-2997382|LOC1100360…
Plant-pathogen interaction	KEGG PATHWAY	peq04626	80	130	4.9416e-14	6.25937e-13	LOC110028464::NW_018164951.1:2995899-2996033|LOC110027277::NW_018164863.1:135193-135615|LOC110028464::NW_018164951.1:2997508-2998098|LOC110029949::NW_018165055.1:36463-37084|LOC110037754::NW_018242621.1:27300-27461|LOC110037754::NW_018242621.1:26358-26944|LOC110036362::NW_018225045.1:23400-23752|LOC110025909::NW_018164783.1:31288-32139|LOC110024494::NW_018164700.1:1550417-1550855|LOC110024201::NW…
Terpenoid backbone biosynthesis	KEGG PATHWAY	peq00900	43	48	9.01028e-12	8.9575e-11	LOC110031586::NW_018165280.1:2811578-2811656|LOC110030681::NW_018165192.1:208641-208796|LOC110031586::NW_018165280.1:2817143-2817319|LOC110024026::NW_018164682.1:1493362-1493692|LOC110030686::NW_018165192.1:115913-116360|LOC110021736::NW_018164582.1:1819009-1819282|LOC110031586::NW_018165280.1:2818427-2818721|LOC110030686::NW_018165192.1:111480-111751|LOC110030681::NW_018165192.1:209371-209642|LO…
MAPK signaling pathway - plant	KEGG PATHWAY	peq04016	74	131	9.42895e-12	8.9575e-11	LOC110031377::NW_018165243.1:503012-503350|LOC110028464::NW_018164951.1:2995899-2996033|LOC110035322::NW_018217219.1:6-263|LOC110030067::NW_018164444.1:52874193-52874324|LOC110037754::NW_018242621.1:27300-27461|LOC110036559::NW_018227645.1:4302-4463|LOC110037754::NW_018242621.1:26358-26944|LOC110030067::NW_018164444.1:52875381-52876398|LOC110030067::NW_018164444.1:52874441-52874601|LOC110019012::…
Phenylalanine, tyrosine and tryptophan biosynthesis	KEGG PATHWAY	peq00400	37	41	2.1733e-10	1.83523e-09	LOC110029155::NW_018164992.1:461871-462135|LOC110030162::NW_018165110.1:190762-191109|LOC110022099::NW_018164609.1:893268-893420|LOC110029155::NW_018164992.1:458157-458265|LOC110030162::NW_018165110.1:198482-198546|LOC110022099::NW_018164609.1:893814-893894|LOC110022099::NW_018164609.1:901500-901586|LOC110030162::NW_018165110.1:194809-194863|LOC110030162::NW_018165110.1:195821-195903|LOC110022099…
Tyrosine metabolism	KEGG PATHWAY	peq00350	36	40	3.99326e-10	3.03488e-09	LOC110029155::NW_018164992.1:461871-462135|LOC110029155::NW_018164992.1:458157-458265|LOC110027562::NW_018164869.1:1469302-1470214|LOC110029155::NW_018164992.1:460646-460812|LOC110030037::NW_018165076.1:165638-165713|LOC110034475::NW_018208486.1:69-635|LOC110030037::NW_018165076.1:166260-166585|LOC110029155::NW_018164992.1:457953-458042|LOC110029155::NW_018164992.1:451622-451790|LOC110030037::NW_…
Phenylalanine metabolism	KEGG PATHWAY	peq00360	33	39	6.05215e-09	4.18148e-08	LOC110029367::NW_018165007.1:402426-402656|LOC110029155::NW_018164992.1:461871-462135|LOC110029155::NW_018164992.1:458157-458265|LOC110029367::NW_018165007.1:404060-404258|LOC110029155::NW_018164992.1:460646-460812|LOC110029367::NW_018165007.1:402722-403645|LOC110034475::NW_018208486.1:69-635|LOC110029155::NW_018164992.1:457953-458042|LOC110029155::NW_018164992.1:451622-451790|LOC110019341::NW_01…
Plant hormone signal transduction	KEGG PATHWAY	peq04075	81	182	6.96521e-09	4.4113e-08	LOC110028745::NW_018164962.1:682385-682450|LOC110028589::NW_018164956.1:203014-203243|LOC110035322::NW_018217219.1:6-263|LOC110025323::NW_018164739.1:1883186-1883425|LOC110028589::NW_018164956.1:202279-202491|LOC110021675::NW_018164579.1:1126837-1127114|LOC110025323::NW_018164739.1:1882726-1882997|LOC110023537::NW_018164666.1:4779030-4779537|LOC110029720::NW_018165040.1:1784615-1785294|LOC1100313…
Fatty acid metabolism	KEGG PATHWAY	peq01212	45	74	2.03957e-08	1.19236e-07	LOC110038777::NW_018251748.1:12568-12874|LOC110036060::NW_018221808.1:82147-82223|LOC110029425::NW_018165012.1:702881-703035|LOC110037188::NW_018235185.1:92886-92955|LOC110038777::NW_018251748.1:9723-11064|LOC110029425::NW_018165012.1:703647-703715|LOC110036060::NW_018221808.1:60544-60667|LOC110038819::NW_018251958.1:5679-5745|LOC110036318::NW_018224576.1:208-709|LOC110036060::NW_018221808.1:8238…
Fatty acid degradation	KEGG PATHWAY	peq00071	34	48	7.83773e-08	4.25477e-07	LOC110033053::NW_018165520.1:919710-920215|LOC110036060::NW_018221808.1:82147-82223|LOC110037031::NW_018233046.1:45390-46476|LOC110033053::NW_018165520.1:938920-939044|LOC110036060::NW_018221808.1:60544-60667|LOC110036060::NW_018221808.1:82387-82520|LOC110036060::NW_018221808.1:54965-55048|LOC110033053::NW_018165520.1:920348-920497|LOC110036060::NW_018221808.1:61409-61505|LOC110030037::NW_0181650…
Ascorbate and aldarate metabolism	KEGG PATHWAY	peq00053	31	41	1.03541e-07	5.24607e-07	LOC110033053::NW_018165520.1:919710-920215|LOC110033183::NW_018165550.1:190650-190730|LOC110033183::NW_018165550.1:197737-197877|LOC110033053::NW_018165520.1:938920-939044|LOC110035730::NW_018219355.1:37952-38078|LOC110022012::NW_018164604.1:79887-79939|LOC110033183::NW_018165550.1:191108-191226|LOC110033183::NW_018165550.1:199061-200190|LOC110022012::NW_018164604.1:81403-81484|LOC110033053::NW_0…
Biosynthesis of unsaturated fatty acids	KEGG PATHWAY	peq01040	23	23	1.65676e-07	7.86963e-07	LOC110036060::NW_018221808.1:82147-82223|LOC110036060::NW_018221808.1:60544-60667|LOC110036318::NW_018224576.1:208-709|LOC110036060::NW_018221808.1:54965-55048|LOC110023778::NW_018164671.1:657153-657222|LOC110036060::NW_018221808.1:61409-61505|LOC110036060::NW_018221808.1:82387-82520|LOC110036060::NW_018221808.1:63425-63492|LOC110037188::NW_018235185.1:92886-92955|LOC110036060::NW_018221808.1:626…
Ubiquinone and other terpenoid-quinone biosynthesis	KEGG PATHWAY	peq00130	33	50	3.92265e-07	1.75366e-06	LOC110020293::NW_018164444.1:76738325-76738459|LOC110032582::NW_018165414.1:31625-31692|LOC110018262::NW_018164448.1:1863316-1864603|LOC110038424::NW_018164444.1:14069008-14069196|LOC110034945::NW_018214752.1:607-729|LOC110019341::NW_018164496.1:2853762-2854001|LOC110026381::NW_018164811.1:767864-768006|LOC110038424::NW_018164444.1:14069779-14069977|LOC110026381::NW_018164811.1:773512-774778|LOC1…
Arginine and proline metabolism	KEGG PATHWAY	peq00330	35	58	8.35802e-07	3.52894e-06	LOC110029367::NW_018165007.1:402426-402656|LOC110033053::NW_018165520.1:919710-920215|LOC110033053::NW_018165520.1:938920-939044|LOC110029155::NW_018164992.1:458157-458265|LOC110029367::NW_018165007.1:404060-404258|LOC110033053::NW_018165520.1:920348-920497|LOC110029155::NW_018164992.1:460646-460812|LOC110033053::NW_018165520.1:921394-921554|LOC110027806::NW_018164891.1:75071-75136|LOC110019083::…
Tropane, piperidine and pyridine alkaloid biosynthesis	KEGG PATHWAY	peq00960	21	22	9.40218e-07	3.76087e-06	LOC110029155::NW_018164992.1:461871-462135|LOC110028074::NW_018164928.1:27372-27478|LOC110019341::NW_018164496.1:2853762-2854001|LOC110028074::NW_018164928.1:26510-26828|LOC110019341::NW_018164496.1:2850139-2850232|LOC110029155::NW_018164992.1:459962-460105|LOC110029155::NW_018164992.1:458157-458265|LOC110019341::NW_018164496.1:2848541-2848803|LOC110028074::NW_018164928.1:28179-28486|LOC110029155…
ABC transporters	KEGG PATHWAY	peq02010	23	30	3.8119e-06	1.44852e-05	LOC110033880::NW_018165746.1:1447113-1447407|LOC110033792::NW_018165733.1:407777-407952|LOC110033792::NW_018165733.1:415517-415810|LOC110033792::NW_018165733.1:412679-413204|LOC110033880::NW_018165746.1:1449153-1449216|LOC110033792::NW_018165733.1:406511-406957|LOC110033880::NW_018165746.1:1441769-1442089|LOC110033880::NW_018165746.1:1449597-1449836|LOC110033792::NW_018165733.1:413701-414581|LOC1…
Nitrogen metabolism	KEGG PATHWAY	peq00910	25	36	5.13951e-06	1.86001e-05	LOC110036198::NW_018223260.1:67443-67613|LOC110019783::NW_018164520.1:68608-69388|LOC110033004::NW_018165518.1:188480-188650|LOC110036198::NW_018223260.1:35672-35788|LOC110019783::NW_018164520.1:67575-67807|LOC110036198::NW_018223260.1:43794-43858|LOC110033004::NW_018165518.1:188189-188291|LOC110020356::NW_018164536.1:258962-259037|LOC110019783::NW_018164520.1:67889-68605|LOC110036198::NW_0182232…
Carotenoid biosynthesis	KEGG PATHWAY	peq00906	23	31	5.60297e-06	1.93557e-05	LOC110030934::NW_018165201.1:4011401-4011519|LOC110030934::NW_018165201.1:4012196-4012302|LOC110031950::NW_018164444.1:53060842-53060898|LOC110026332::NW_018164806.1:949840-949946|LOC110026332::NW_018164806.1:951996-952148|LOC110031950::NW_018164444.1:53060006-53060212|LOC110026332::NW_018164806.1:953652-953953|LOC110030934::NW_018165201.1:4012889-4013069|LOC110026332::NW_018164806.1:951475-95156…
Fatty acid biosynthesis	KEGG PATHWAY	peq00061	28	46	9.00189e-06	2.97454e-05	LOC110038777::NW_018251748.1:12568-12874|LOC110029425::NW_018165012.1:702881-703035|LOC110037828::NW_018243536.1:52213-52638|LOC110038777::NW_018251748.1:9723-11064|LOC110029425::NW_018165012.1:703647-703715|LOC110038819::NW_018251958.1:5679-5745|LOC110036318::NW_018224576.1:208-709|LOC110037828::NW_018243536.1:51908-52027|LOC110037828::NW_018243536.1:54932-55065|LOC110038819::NW_018251958.1:5500…
Cysteine and methionine metabolism	KEGG PATHWAY	peq00270	40	83	1.00847e-05	3.19349e-05	LOC110025102::NW_018164730.1:241596-241895|LOC110018548::NW_018164466.1:1388876-1389105|LOC110025102::NW_018164730.1:232111-232220|LOC110030067::NW_018164444.1:52874193-52874324|LOC110018548::NW_018164466.1:1389710-1390008|LOC110025102::NW_018164730.1:237200-237279|LOC110030067::NW_018164444.1:52875381-52876398|LOC110030067::NW_018164444.1:52874441-52874601|LOC110019341::NW_018164496.1:2850448-28…
beta-Alanine metabolism	KEGG PATHWAY	peq00410	27	46	2.09648e-05	6.3733e-05	LOC110033053::NW_018165520.1:919710-920215|LOC110033053::NW_018165520.1:938920-939044|LOC110033053::NW_018165520.1:920348-920497|LOC110033053::NW_018165520.1:921394-921554|LOC110027806::NW_018164891.1:75071-75136|LOC110019083::NW_018164444.1:69677104-69677217|LOC110027806::NW_018164891.1:75286-76188|LOC110033053::NW_018165520.1:954532-954600|LOC110019083::NW_018164444.1:69673692-69674121|LOC11001…
Pyruvate metabolism	KEGG PATHWAY	peq00620	33	68	5.22042e-05	0.000152597	LOC110033053::NW_018165520.1:919710-920215|LOC110033053::NW_018165520.1:938920-939044|LOC110023679::NW_018164444.1:27393919-27394080|LOC110023679::NW_018164444.1:27397644-27397823|LOC110036944::NW_018231831.1:16904-17198|LOC110023679::NW_018164444.1:27390365-27390494|LOC110023679::NW_018164444.1:27387014-27387091|LOC110033053::NW_018165520.1:920348-920497|LOC110033053::NW_018165520.1:921394-92155…
Tryptophan metabolism	KEGG PATHWAY	peq00380	29	57	7.66498e-05	0.000215755	LOC110029367::NW_018165007.1:402426-402656|LOC110033053::NW_018165520.1:919710-920215|LOC110033053::NW_018165520.1:938920-939044|LOC110029367::NW_018165007.1:404625-404855|LOC110033053::NW_018165520.1:954532-954600|LOC110037786::NW_018243088.1:151844-153470|LOC110033053::NW_018165520.1:920348-920497|LOC110033053::NW_018165520.1:921394-921554|LOC110029367::NW_018165007.1:404060-404258|LOC110034475…
Glycolysis / Gluconeogenesis	KEGG PATHWAY	peq00010	41	98	9.96649e-05	0.000270519	LOC110033053::NW_018165520.1:919710-920215|LOC110030037::NW_018165076.1:165638-165713|LOC110033053::NW_018165520.1:938920-939044|LOC110026975::NW_018164851.1:3081-3218|LOC110036944::NW_018231831.1:16904-17198|LOC110026975::NW_018164851.1:4730-4859|LOC110033053::NW_018165520.1:920348-920497|LOC110023280::NW_018164665.1:956683-956741|LOC110033053::NW_018165520.1:921394-921554|LOC110036944::NW_01823…
Valine, leucine and isoleucine degradation	KEGG PATHWAY	peq00280	25	47	0.000137659	0.000360761	LOC110033053::NW_018165520.1:919710-920215|LOC110036060::NW_018221808.1:82147-82223|LOC110033053::NW_018165520.1:938920-939044|LOC110036060::NW_018221808.1:60544-60667|LOC110036060::NW_018221808.1:82387-82520|LOC110036060::NW_018221808.1:54965-55048|LOC110033053::NW_018165520.1:920348-920497|LOC110036060::NW_018221808.1:61409-61505|LOC110033053::NW_018165520.1:954532-954600|LOC110033053::NW_01816…
Peroxisome	KEGG PATHWAY	peq04146	33	73	0.000149721	0.000379293	LOC110026231::NW_018164801.1:751249-751376|LOC110036060::NW_018221808.1:60544-60667|LOC110026231::NW_018164801.1:750290-750709|LOC110026231::NW_018164801.1:755433-755536|LOC110036060::NW_018221808.1:54965-55048|LOC110036060::NW_018221808.1:82147-82223|LOC110027892::NW_018164903.1:16213-16294|LOC110036060::NW_018221808.1:61409-61505|LOC110026231::NW_018164801.1:753916-754118|LOC110036060::NW_01822…
Monoterpenoid biosynthesis	KEGG PATHWAY	peq00902	11	11	0.000297396	0.0007291	LOC110031556::NW_018165280.1:1223903-1224095|LOC110031874::NW_018164444.1:25159815-25160100|LOC110031556::NW_018165280.1:1222198-1222336|LOC110031874::NW_018164444.1:25160103-25160896|LOC110031556::NW_018165280.1:1222955-1223188|LOC110031556::NW_018165280.1:1223371-1223648|LOC110031556::NW_018165280.1:1222812-1222907|LOC110031556::NW_018165280.1:1234037-1234173|LOC110031556::NW_018165280.1:122141…
Alanine, aspartate and glutamate metabolism	KEGG PATHWAY	peq00250	24	48	0.000374429	0.000889268	LOC110029155::NW_018164992.1:458157-458265|LOC110029155::NW_018164992.1:460646-460812|LOC110020356::NW_018164536.1:258962-259037|LOC110029155::NW_018164992.1:457953-458042|LOC110029155::NW_018164992.1:451622-451790|LOC110038090::NW_018248576.1:881-1215|LOC110020356::NW_018164536.1:253213-253326|LOC110029155::NW_018164992.1:461871-462135|LOC110020356::NW_018164536.1:256221-256337|LOC110020356::NW_…
Arginine biosynthesis	KEGG PATHWAY	peq00220	18	30	0.000396032	0.000912074	LOC110029155::NW_018164992.1:461871-462135|LOC110020356::NW_018164536.1:256221-256337|LOC110020356::NW_018164536.1:259310-259687|LOC110020356::NW_018164536.1:259129-259215|LOC110029155::NW_018164992.1:459962-460105|LOC110020356::NW_018164536.1:252909-253097|LOC110029155::NW_018164992.1:458157-458265|LOC110020356::NW_018164536.1:258962-259037|LOC110029155::NW_018164992.1:462996-463285|LOC110029155…
Carbon fixation in photosynthetic organisms	KEGG PATHWAY	peq00710	26	55	0.000426113	0.000952487	LOC110030193::NW_018165112.1:65316-65759|LOC110018947::NW_018164478.1:4109499-4109743|LOC110023679::NW_018164444.1:27393919-27394080|LOC110023679::NW_018164444.1:27397644-27397823|LOC110023679::NW_018164444.1:27390365-27390494|LOC110018947::NW_018164478.1:4109961-4110045|LOC110023679::NW_018164444.1:27387014-27387091|LOC110018947::NW_018164478.1:4109028-4109413|LOC110023679::NW_018164444.1:274056…
Glycerolipid metabolism	KEGG PATHWAY	peq00561	30	69	0.000488761	0.00106131	LOC110032551::NW_018165409.1:36260-36390|LOC110033053::NW_018165520.1:919710-920215|LOC110029998::NW_018165066.1:68475-68958|LOC110033053::NW_018165520.1:938920-939044|LOC110019459::NW_018164499.1:97947-98676|LOC110033053::NW_018165520.1:920348-920497|LOC110029998::NW_018165066.1:70929-71448|LOC110033053::NW_018165520.1:921394-921554|LOC110029998::NW_018165066.1:70400-70464|LOC110033053::NW_01816…
Biosynthesis of amino acids	KEGG PATHWAY	peq01230	59	187	0.00168148	0.00354979	LOC110025102::NW_018164730.1:241596-241895|LOC110029155::NW_018164992.1:461871-462135|LOC110025102::NW_018164730.1:231602-231807|LOC110030162::NW_018165110.1:190762-191109|LOC110026975::NW_018164851.1:3081-3218|LOC110025102::NW_018164730.1:237200-237279|LOC110019341::NW_018164496.1:2853762-2854001|LOC110022099::NW_018164609.1:893268-893420|LOC110025102::NW_018164730.1:232111-232220|LOC110029155::…
Galactose metabolism	KEGG PATHWAY	peq00052	18	36	0.00193918	0.00398318	LOC110026975::NW_018164851.1:4580-4648|LOC110026975::NW_018164851.1:3081-3218|LOC110038456::NW_018250859.1:70639-70869|LOC110026975::NW_018164851.1:5624-5848|LOC110026975::NW_018164851.1:1920-2150|LOC110038456::NW_018250859.1:62980-63629|LOC110038456::NW_018250859.1:62256-62561|LOC110026975::NW_018164851.1:4386-4439|LOC110026975::NW_018164851.1:1841-2150|LOC110026975::NW_018164851.1:4114-4272|LOC…
Histidine metabolism	KEGG PATHWAY	peq00340	11	16	0.00245805	0.0049161	LOC110033053::NW_018165520.1:953183-953279|LOC110033053::NW_018165520.1:919710-920215|LOC110033053::NW_018165520.1:921394-921554|LOC110033053::NW_018165520.1:954713-955082|LOC110033053::NW_018165520.1:938920-939044|LOC110033053::NW_018165520.1:922642-922746|LOC110033053::NW_018165520.1:954532-954600|LOC110033053::NW_018165520.1:920348-920497|LOC110033053::NW_018165520.1:921219-921309|LOC110033053…
Carbon metabolism	KEGG PATHWAY	peq01200	63	208	0.00267043	0.00520392	LOC110025102::NW_018164730.1:241596-241895|LOC110025102::NW_018164730.1:231602-231807|LOC110025102::NW_018164730.1:237200-237279|LOC110030193::NW_018165112.1:65316-65759|LOC110026975::NW_018164851.1:3081-3218|LOC110018947::NW_018164478.1:4109499-4109743|LOC110026975::NW_018164851.1:4580-4648|LOC110023679::NW_018164444.1:27397644-27397823|LOC110023679::NW_018164444.1:27390365-27390494|LOC110025102…
Inositol phosphate metabolism	KEGG PATHWAY	peq00562	21	53	0.00745103	0.014157	LOC110022012::NW_018164604.1:81109-81313|LOC110022012::NW_018164604.1:79040-79121|LOC110024153::NW_018164692.1:1237502-1237698|LOC110024153::NW_018164692.1:1246177-1246604|LOC110024153::NW_018164692.1:1239583-1239821|LOC110024153::NW_018164692.1:1239038-1239173|LOC110022012::NW_018164604.1:79887-79939|LOC110024153::NW_018164692.1:1241111-1241197|LOC110024926::NW_018164721.1:37996-39202|LOC1100220…
Sesquiterpenoid and triterpenoid biosynthesis	KEGG PATHWAY	peq00909	8	12	0.0107839	0.0199897	LOC110027154::NW_018164858.1:345995-346133|LOC110027154::NW_018164858.1:344589-344838|LOC110027154::NW_018164858.1:343304-343420|LOC110027154::NW_018164858.1:345621-345839|LOC110027154::NW_018164858.1:345169-345358|LOC110027154::NW_018164858.1:346743-347042|LOC110027154::NW_018164858.1:346410-346658|LOC110027154::NW_018164858.1:344946-345128
Phosphatidylinositol signaling system	KEGG PATHWAY	peq04070	19	54	0.0263139	0.0476156	LOC110024153::NW_018164692.1:1246177-1246604|LOC110026663::NW_018164834.1:248946-249507|LOC110026663::NW_018164834.1:250333-250546|LOC110024153::NW_018164692.1:1237502-1237698|LOC110024153::NW_018164692.1:1240000-1240117|LOC110026663::NW_018164834.1:254621-254807|LOC110024153::NW_018164692.1:1239583-1239821|LOC110024153::NW_018164692.1:1239038-1239173|LOC110018617::NW_018164469.1:173694-174418|LO…
Taurine and hypotaurine metabolism	KEGG PATHWAY	peq00430	6	12	0.0634365	0.11212	LOC110022221::NW_018164616.1:710694-711377|LOC110022221::NW_018164616.1:711952-712166|LOC110022221::NW_018164616.1:712271-712471|LOC110022221::NW_018164616.1:711633-711886|LOC110038090::NW_018248576.1:881-1215|LOC110038090::NW_018248576.1:382-792
Flavonoid biosynthesis	KEGG PATHWAY	peq00941	11	31	0.0758968	0.131094	LOC110024427::NW_018164698.1:276460-277210|LOC110023518::NW_018164666.1:5792945-5793150|LOC110023518::NW_018164666.1:5794018-5794162|LOC110022396::NW_018164630.1:826740-827526|LOC110024427::NW_018164698.1:272728-273546|LOC110023518::NW_018164666.1:5795216-5795736|LOC110030623::NW_018165184.1:170422-171634|LOC110024427::NW_018164698.1:273641-273774|LOC110023518::NW_018164666.1:5793813-5793892|LOC1…
Brassinosteroid biosynthesis	KEGG PATHWAY	peq00905	8	21	0.0938126	0.158439	LOC110018390::NW_018164463.1:247230-247975|LOC110026846::NW_018164844.1:1041333-1041463|LOC110026846::NW_018164844.1:1040675-1040898|LOC110026846::NW_018164844.1:1040170-1040588|LOC110026846::NW_018164844.1:1040992-1041245|LOC110018390::NW_018164463.1:245934-246986|LOC110026846::NW_018164844.1:1041466-1041719|LOC110026846::NW_018164844.1:1041815-1042542
Sulfur metabolism	KEGG PATHWAY	peq00920	9	26	0.11244	0.18577	LOC110025102::NW_018164730.1:241596-241895|LOC110025102::NW_018164730.1:232111-232220|LOC110025102::NW_018164730.1:231602-231807|LOC110025102::NW_018164730.1:237200-237279|LOC110025102::NW_018164730.1:236813-236950|LOC110025102::NW_018164730.1:238005-238085|LOC110025102::NW_018164730.1:237530-237589|LOC110025102::NW_018164730.1:232536-232593|LOC110025102::NW_018164730.1:233769-234032
Diterpenoid biosynthesis	KEGG PATHWAY	peq00904	9	27	0.129031	0.208646	LOC110023759::NW_018164444.1:69744774-69745156|LOC110021750::NW_018164583.1:165271-166382|LOC110021750::NW_018164583.1:161947-162658|LOC110038145::NW_018249546.1:411872-412648|LOC110023759::NW_018164444.1:69747377-69748052|LOC110038145::NW_018249546.1:390077-390245|LOC110023759::NW_018164444.1:69745839-69746160|LOC110038145::NW_018249546.1:410138-410355|LOC110021750::NW_018164583.1:164120-164537
Protein processing in endoplasmic reticulum	KEGG PATHWAY	peq04141	42	172	0.132008	0.209013	LOC110027277::NW_018164863.1:135193-135615|LOC110039414::NW_018164444.1:8139860-8140019|LOC110026661::NW_018164834.1:853873-854076|LOC110039414::NW_018164444.1:8138678-8138990|LOC110020563::NW_018164543.1:201205-201527|LOC110023015::NW_018164444.1:51297195-51297358|LOC110025930::NW_018164785.1:183273-185090|LOC110021441::NW_018164576.1:2760128-2760634|LOC110035275::NW_018217038.1:38-541|LOC110027…
Lysine degradation	KEGG PATHWAY	peq00310	11	38	0.176975	0.274492	LOC110033053::NW_018165520.1:953183-953279|LOC110033053::NW_018165520.1:919710-920215|LOC110033053::NW_018165520.1:921394-921554|LOC110033053::NW_018165520.1:954713-955082|LOC110033053::NW_018165520.1:938920-939044|LOC110033053::NW_018165520.1:922642-922746|LOC110033053::NW_018165520.1:954532-954600|LOC110033053::NW_018165520.1:920348-920497|LOC110033053::NW_018165520.1:921219-921309|LOC110033053…
Fatty acid elongation	KEGG PATHWAY	peq00062	9	30	0.185826	0.282455	LOC110037188::NW_018235185.1:92886-92955|LOC110026642::NW_018164832.1:29839-30499|LOC110029977::NW_018165058.1:220153-222333|LOC110027349::NW_018164866.1:255014-256972|LOC110027699::NW_018164877.1:1024712-1026624|LOC110037188::NW_018235185.1:91841-92580|LOC110026642::NW_018164832.1:32025-32907|LOC110037188::NW_018235185.1:94826-95177|LOC110019290::NW_018164496.1:1150736-1152781
Pentose phosphate pathway	KEGG PATHWAY	peq00030	13	50	0.235275	0.350606	LOC110026975::NW_018164851.1:4580-4648|LOC110026975::NW_018164851.1:3081-3218|LOC110026975::NW_018164851.1:5624-5848|LOC110026975::NW_018164851.1:1920-2150|LOC110026975::NW_018164851.1:4730-4859|LOC110026975::NW_018164851.1:4386-4439|LOC110026975::NW_018164851.1:1841-2150|LOC110026975::NW_018164851.1:4114-4272|LOC110026975::NW_018164851.1:2938-3000|LOC110026975::NW_018164851.1:6438-6489|LOC110026…
Butanoate metabolism	KEGG PATHWAY	peq00650	6	20	0.252566	0.369135	LOC110022221::NW_018164616.1:710694-711377|LOC110022221::NW_018164616.1:711952-712166|LOC110022221::NW_018164616.1:712271-712471|LOC110022221::NW_018164616.1:711633-711886|LOC110038090::NW_018248576.1:881-1215|LOC110038090::NW_018248576.1:382-792
Flavone and flavonol biosynthesis	KEGG PATHWAY	peq00944	3	8	0.269674	0.386702	LOC110022396::NW_018164630.1:826740-827526|LOC110022396::NW_018164630.1:825485-826256|LOC110022396::NW_018164630.1:826380-826616
Fructose and mannose metabolism	KEGG PATHWAY	peq00051	13	61	0.455208	0.640663	LOC110026975::NW_018164851.1:4580-4648|LOC110026975::NW_018164851.1:3081-3218|LOC110026975::NW_018164851.1:5624-5848|LOC110026975::NW_018164851.1:1920-2150|LOC110026975::NW_018164851.1:4730-4859|LOC110026975::NW_018164851.1:4386-4439|LOC110026975::NW_018164851.1:1841-2150|LOC110026975::NW_018164851.1:4114-4272|LOC110026975::NW_018164851.1:2938-3000|LOC110026975::NW_018164851.1:6438-6489|LOC110026…
Zeatin biosynthesis	KEGG PATHWAY	peq00908	7	32	0.473139	0.644108	LOC110028987::NW_018164980.1:1286539-1287751|LOC110023168::NW_018164663.1:162785-163440|LOC110023168::NW_018164663.1:161956-162228|LOC110023168::NW_018164663.1:161561-161823|LOC110023168::NW_018164663.1:162682-162783|LOC110023168::NW_018164663.1:161023-161483|LOC110028987::NW_018164980.1:1285718-1286325
2-Oxocarboxylic acid metabolism	KEGG PATHWAY	peq01210	9	42	0.474606	0.644108	LOC110029155::NW_018164992.1:461871-462135|LOC110029155::NW_018164992.1:459962-460105|LOC110029155::NW_018164992.1:458157-458265|LOC110029155::NW_018164992.1:462996-463285|LOC110029155::NW_018164992.1:457953-458042|LOC110029155::NW_018164992.1:451622-451790|LOC110029155::NW_018164992.1:458363-458472|LOC110029155::NW_018164992.1:457258-457452|LOC110029155::NW_018164992.1:460646-460812
Arachidonic acid metabolism	KEGG PATHWAY	peq00590	3	14	0.551646	0.735528	LOC110027503::NW_018164869.1:1419659-1420068|LOC110027503::NW_018164869.1:1420377-1420673|LOC110027503::NW_018164869.1:1420159-1420284
Porphyrin and chlorophyll metabolism	KEGG PATHWAY	peq00860	8	42	0.601055	0.787589	LOC110035673::NW_018218850.1:704249-704396|LOC110035673::NW_018218850.1:705456-705568|LOC110035673::NW_018218850.1:703663-703767|LOC110035673::NW_018218850.1:706426-706720|LOC110035673::NW_018218850.1:703881-704159|LOC110035673::NW_018218850.1:702932-703177|LOC110035673::NW_018218850.1:707147-707451|LOC110035673::NW_018218850.1:705088-705272
Glyoxylate and dicarboxylate metabolism	KEGG PATHWAY	peq00630	12	64	0.619121	0.797512	LOC110019670::NW_018164509.1:410181-410721|LOC110019670::NW_018164509.1:410835-410959|LOC110030193::NW_018165112.1:66624-66857|LOC110030193::NW_018165112.1:65316-65759|LOC110038923::NW_018164444.1:59646750-59646853|LOC110038923::NW_018164444.1:59646927-59647989|LOC110038923::NW_018164444.1:59648106-59648393|LOC110038923::NW_018164444.1:59645788-59646217|LOC110019670::NW_018164509.1:412020-412329|…
RNA degradation	KEGG PATHWAY	peq03018	15	92	0.796603	1	LOC110026975::NW_018164851.1:4580-4648|LOC110026975::NW_018164851.1:3081-3218|LOC110033294::NW_018165564.1:340-1708|LOC110026975::NW_018164851.1:5624-5848|LOC110026975::NW_018164851.1:1920-2150|LOC110023439::NW_018164666.1:2857627-2858523|LOC110026975::NW_018164851.1:4386-4439|LOC110026975::NW_018164851.1:1841-2150|LOC110026975::NW_018164851.1:4114-4272|LOC110026975::NW_018164851.1:2938-3000|LOC1…
Ether lipid metabolism	KEGG PATHWAY	peq00565	3	23	0.828774	1	LOC110027503::NW_018164869.1:1419659-1420068|LOC110027503::NW_018164869.1:1420377-1420673|LOC110027503::NW_018164869.1:1420159-1420284
Other glycan degradation	KEGG PATHWAY	peq00511	2	21	0.913519	1	LOC110018958::NW_018164478.1:4514878-4515842|LOC110018958::NW_018164478.1:4516560-4517548
Sphingolipid metabolism	KEGG PATHWAY	peq00600	4	37	0.925526	1	LOC110026593::NW_018164824.1:351197-351705|LOC110026593::NW_018164824.1:350109-351084|LOC110026595::NW_018164824.1:376116-376803|LOC110026595::NW_018164824.1:375455-376003
Propanoate metabolism	KEGG PATHWAY	peq00640	4	37	0.925526	1	LOC110036944::NW_018231831.1:17200-17729|LOC110036944::NW_018231831.1:15129-15322|LOC110036944::NW_018231831.1:14815-15127|LOC110036944::NW_018231831.1:16904-17198
Amino sugar and nucleotide sugar metabolism	KEGG PATHWAY	peq00520	13	103	0.959192	1	LOC110022770::NW_018164644.1:1354813-1355113|LOC110036736::NW_018229347.1:371364-373563|LOC110022418::NW_018164631.1:186121-186447|LOC110022418::NW_018164631.1:184287-184596|LOC110034390::NW_018205930.1:88-648|LOC110022418::NW_018164631.1:184599-184816|LOC110038695::NW_018251492.1:57526-58944|LOC110022418::NW_018164631.1:183622-183976|LOC110035730::NW_018219355.1:38211-38888|LOC110038695::NW_0182…
Aminoacyl-tRNA biosynthesis	KEGG PATHWAY	peq00970	6	60	0.972121	1	LOC110018332::NW_018164444.1:42495827-42495882|LOC110018332::NW_018164444.1:42481580-42481687|LOC110018332::NW_018164444.1:42480259-42480396|LOC110018332::NW_018164444.1:42479939-42480062|LOC110018332::NW_018164444.1:42482527-42482637|LOC110018332::NW_018164444.1:42496403-42496592
Glutathione metabolism	KEGG PATHWAY	peq00480	6	62	0.977716	1	LOC110034648::NW_018211801.1:6-305|LOC110023027::NW_018164646.1:164257-164776|LOC110035233::NW_018216856.1:572-1108|LOC110028872::NW_018164975.1:555584-556111|LOC110023027::NW_018164646.1:163031-163366|LOC110035233::NW_018216856.1:1194-1608
SNARE interactions in vesicular transport	KEGG PATHWAY	peq04130	3	43	0.987736	1	LOC110039157::NW_018253466.1:14270-14838|LOC110039157::NW_018253466.1:14980-15135|LOC110039157::NW_018253466.1:15430-16052
Pentose and glucuronate interconversions	KEGG PATHWAY	peq00040	7	81	0.994047	1	LOC110035730::NW_018219355.1:37952-38078|LOC110025508::NW_018164743.1:2585840-2586803|LOC110025508::NW_018164743.1:2586909-2588166|LOC110033510::NW_018165642.1:20202-21228|LOC110035730::NW_018219355.1:38211-38888|LOC110033510::NW_018165642.1:27847-28054|LOC110033510::NW_018165642.1:28056-28791
N-Glycan biosynthesis	KEGG PATHWAY	peq00510	2	42	0.996635	1	LOC110018942::NW_018164478.1:291929-292584|LOC110018942::NW_018164478.1:290068-291559
Photosynthesis	KEGG PATHWAY	peq00195	4	69	0.998908	1	LOC110032962::NW_018165509.1:113221-113307|LOC110030958::NW_018165201.1:6714-7434|LOC110032962::NW_018165509.1:112708-113027|LOC110032962::NW_018165509.1:113376-113506
Spliceosome	KEGG PATHWAY	peq03040	14	163	0.999761	1	LOC110035275::NW_018217038.1:38-541|LOC110020563::NW_018164543.1:196903-198081|LOC110020563::NW_018164543.1:201205-201527|LOC110023491::NW_018164666.1:1030712-1030876|LOC110026661::NW_018164834.1:854930-856804|LOC110026661::NW_018164834.1:853873-854076|LOC110023491::NW_018164666.1:1029126-1029526|LOC110022095::NW_018164609.1:472764-473045|LOC110022095::NW_018164609.1:472533-472644|LOC110022095::N…
Glycerophospholipid metabolism	KEGG PATHWAY	peq00564	4	89	0.999942	1	LOC110027503::NW_018164869.1:1419659-1420068|LOC110022915::NW_018164645.1:2935584-2937524|LOC110027503::NW_018164869.1:1420377-1420673|LOC110027503::NW_018164869.1:1420159-1420284
Endocytosis	KEGG PATHWAY	peq04144	8	138	0.999988	1	LOC110035275::NW_018217038.1:38-541|LOC110020563::NW_018164543.1:196903-198081|LOC110020563::NW_018164543.1:201205-201527|LOC110026661::NW_018164834.1:854930-856804|LOC110026661::NW_018164834.1:853873-854076|LOC110026661::NW_018164834.1:853774-854076|LOC110035275::NW_018217038.1:737-1384|LOC110020563::NW_018164543.1:198084-198887
mRNA surveillance pathway	KEGG PATHWAY	peq03015	2	105	1	1	LOC110035093::NW_018164444.1:3793787-3794374|LOC110035093::NW_018164444.1:3793470-3793709
RNA transport	KEGG PATHWAY	peq03013	3	149	1	1	LOC110034104::NW_018164444.1:32242374-32242612|LOC110034104::NW_018164444.1:32239903-32240103|LOC110034104::NW_018164444.1:32241721-32241870
--------------------
#Term	Database	ID	Input number	Background number	P-Value	Corrected P-Value	Input
--------------------
#Term	Database	ID	Input number	Background number	P-Value	Corrected P-Value	Input
--------------------

## Sheet: SNP
Table S6 Single Nucleotide Polymorphisms variation sites
CHROM	POS	REF	ALT
NW_018164443.1	8012	T	G
NW_018164443.1	8015	A	G
NW_018164443.1	8016	A	C
NW_018164443.1	8019	T	C
NW_018164443.1	8022	G	C
NW_018164443.1	8050	C	T
NW_018164443.1	8068	C	G
NW_018164443.1	8070	T	A
NW_018164443.1	8071	C	G
NW_018164443.1	8081	G	C
NW_018164443.1	8089	A	G
NW_018164443.1	8105	C	G
NW_018164443.1	8113	G	T
NW_018164443.1	12257	C	T
NW_018164443.1	12273	A	T
NW_018164443.1	12347	C	T
NW_018164443.1	12822	T	G
NW_018164443.1	12823	T	C
NW_018164443.1	12834	A	T
NW_018164443.1	12868	G	A
NW_018164443.1	21060	T	C
NW_018164443.1	24204	C	T
NW_018164443.1	32792	T	C
NW_018164443.1	32803	G	C
NW_018164443.1	32826	C	T
NW_018164443.1	32843	T	A
NW_018164443.1	32846	T	A
NW_018164443.1	32849	T	A
NW_018164443.1	32852	T	A
NW_018164443.1	32860	T	A
NW_018164443.1	32984	T	A
NW_018164443.1	32989	G	T
NW_018164443.1	32992	T	C
NW_018164443.1	33019	T	G
NW_018164443.1	33863	A	G
NW_018164443.1	34067	T	C
NW_018164443.1	37603	T	C
NW_018164443.1	37604	G	C
NW_018164443.1	40235	A	G
NW_018164443.1	40239	C	T
NW_018164443.1	41589	G	A
NW_018164443.1	43938	C	T
NW_018164443.1	44079	T	C
NW_018164443.1	44080	T	G
NW_018164443.1	44082	A	C
NW_018164443.1	44090	C	G
NW_018164443.1	44094	T	A
NW_018164443.1	44978	G	A
NW_018164443.1	44980	A	G
NW_018164443.1	44981	T	A
NW_018164443.1	44992	G	C
NW_018164443.1	45025	A	C
NW_018164443.1	45026	G	C
NW_018164443.1	45059	A	G
NW_018164443.1	47526	C	T
NW_018164443.1	47533	G	T
NW_018164443.1	47551	C	A
NW_018164443.1	47560	A	G
NW_018164443.1	47577	G	A
NW_018164443.1	47586	G	A
NW_018164443.1	48599	T	C
NW_018164443.1	48605	T	A
NW_018164443.1	48616	G	A
NW_018164443.1	48641	T	A
NW_018164443.1	48649	C	G
NW_018164443.1	48667	C	T
NW_018164443.1	49425	T	G
NW_018164443.1	55936	T	G
NW_018164443.1	60603	T	G
NW_018164443.1	60605	T	G
NW_018164443.1	92703	T	C
NW_018164443.1	92709	A	T
NW_018164443.1	92711	T	G
NW_018164443.1	92719	G	C
NW_018164443.1	92739	G	C
NW_018164443.1	92743	T	A
NW_018164443.1	92746	G	A
NW_018164443.1	93771	G	A
NW_018164443.1	93773	A	G
NW_018164443.1	93775	C	T
NW_018164443.1	97371	C	G
NW_018164443.1	97379	C	T
NW_018164443.1	97381	A	G
NW_018164443.1	97386	A	C
NW_018164443.1	108776	C	G
NW_018164443.1	112652	C	A
NW_018164443.1	112654	G	A
NW_018164443.1	121226	C	A
NW_018164443.1	137345	G	A
NW_018164443.1	164544	A	T
NW_018164443.1	164576	A	G
NW_018164443.1	164589	A	G
NW_018164443.1	164764	T	G
NW_018164443.1	164778	A	G
NW_018164443.1	190390	G	C
NW_018164443.1	190409	G	A
NW_018164443.1	190412	C	T
NW_018164443.1	190420	T	A
NW_018164443.1	190443	T	A
NW_018164443.1	190446	A	G
NW_018164443.1	190721	C	T
NW_018164443.1	191967	C	T
NW_018164443.1	194048	C	T
NW_018164443.1	194171	C	G
NW_018164443.1	194172	C	T
NW_018164443.1	194865	A	G
NW_018164443.1	194866	T	C
NW_018164443.1	195249	C	T
NW_018164443.1	195550	A	G
NW_018164443.1	197828	C	T
NW_018164443.1	198636	C	A
NW_018164443.1	198891	A	G
NW_018164443.1	198960	C	T
NW_018164443.1	199449	A	G
NW_018164443.1	199719	G	A
NW_018164443.1	201529	T	A
NW_018164443.1	202063	C	T
NW_018164443.1	202504	T	G
NW_018164443.1	204434	T	C
NW_018164443.1	209526	G	A
NW_018164443.1	209941	A	G
NW_018164443.1	210114	G	A
NW_018164443.1	210124	T	C
NW_018164443.1	210140	G	A
NW_018164443.1	210148	C	A
NW_018164443.1	210521	A	G
NW_018164443.1	212180	T	G
NW_018164443.1	212461	G	T
NW_018164443.1	212996	T	G
NW_018164443.1	216705	C	T
NW_018164443.1	220444	T	A
NW_018164443.1	233209	C	G
NW_018164443.1	233210	A	G
NW_018164443.1	233674	G	A
NW_018164443.1	233824	G	A
NW_018164443.1	233898	T	G
NW_018164443.1	234628	A	T
NW_018164443.1	234639	T	C
NW_018164443.1	234640	A	T
NW_018164443.1	235621	G	A
NW_018164443.1	235642	T	A
NW_018164443.1	235649	A	G
NW_018164443.1	236065	A	G
NW_018164443.1	236158	G	A
NW_018164443.1	236161	G	A
NW_018164443.1	236168	T	C
NW_018164443.1	236224	G	A
NW_018164443.1	236231	C	T
NW_018164443.1	236361	C	G
NW_018164443.1	237041	C	T
NW_018164443.1	237237	C	T
NW_018164443.1	237241	C	A
NW_018164443.1	248630	A	G
NW_018164443.1	248635	A	G
NW_018164443.1	248648	T	C
NW_018164443.1	248660	A	G
NW_018164443.1	248668	G	T
NW_018164443.1	248686	G	A
NW_018164443.1	248700	A	C
NW_018164443.1	248714	A	T
NW_018164443.1	248718	G	T
NW_018164443.1	248728	G	A
NW_018164443.1	256949	C	G
NW_018164443.1	256954	G	T
NW_018164443.1	256955	T	C
NW_018164443.1	257062	C	T
NW_018164443.1	257071	A	T
NW_018164443.1	257080	A	G
NW_018164443.1	257101	G	T
NW_018164443.1	257105	C	T
NW_018164443.1	257107	T	C
NW_018164443.1	257144	T	A
NW_018164443.1	304029	T	A
NW_018164443.1	304032	C	A
NW_018164443.1	304034	C	G
NW_018164443.1	304036	T	A
NW_018164443.1	304040	G	A
NW_018164443.1	304042	C	G
NW_018164443.1	304058	C	G
NW_018164443.1	304140	G	T
NW_018164443.1	304141	A	C
NW_018164443.1	304812	T	C
NW_018164443.1	304830	A	G
NW_018164443.1	304842	G	A
NW_018164443.1	304908	C	G
NW_018164443.1	304928	T	C
NW_018164443.1	305658	G	A
NW_018164443.1	305661	G	T
NW_018164443.1	306137	G	T
NW_018164443.1	307129	C	T
NW_018164443.1	307140	T	A
NW_018164443.1	307161	G	C
NW_018164443.1	307215	T	C
NW_018164443.1	307585	G	C
NW_018164443.1	311620	C	T
NW_018164443.1	316096	C	T
NW_018164443.1	317089	G	A
NW_018164443.1	318496	T	G
NW_018164443.1	318498	C	T
NW_018164443.1	324953	A	C
NW_018164443.1	325014	A	T
NW_018164443.1	325973	A	T
NW_018164443.1	325977	G	C
NW_018164443.1	326021	A	G
NW_018164443.1	326521	G	A
NW_018164443.1	326523	A	C
NW_018164443.1	326524	A	G
NW_018164443.1	326534	C	A
NW_018164443.1	326540	C	T
NW_018164443.1	327127	A	G
NW_018164443.1	327132	T	C
NW_018164443.1	327150	C	T
NW_018164443.1	327151	A	T
NW_018164443.1	327162	G	A
NW_018164443.1	328370	C	T
NW_018164443.1	329950	G	A
NW_018164443.1	330079	G	T
NW_018164443.1	330090	A	G
NW_018164443.1	342159	T	A
NW_018164443.1	342168	C	T
NW_018164443.1	342178	C	T
NW_018164443.1	342326	A	G
NW_018164443.1	343735	C	T
NW_018164443.1	358262	G	A
NW_018164443.1	358284	G	T
NW_018164443.1	358289	T	A
NW_018164443.1	358302	G	A
NW_018164443.1	358326	T	C
NW_018164443.1	362529	A	T
NW_018164443.1	362990	G	A
NW_018164443.1	362995	A	G
NW_018164443.1	369059	G	T
NW_018164443.1	375301	C	T
NW_018164443.1	375303	A	G
NW_018164443.1	376089	G	T
NW_018164443.1	376857	G	A
NW_018164443.1	377021	A	T
NW_018164443.1	378163	C	T
NW_018164443.1	378176	G	A
NW_018164443.1	378264	A	G
NW_018164443.1	379353	G	A
NW_018164443.1	379354	T	C
NW_018164443.1	379355	C	A
NW_018164443.1	379793	T	C
NW_018164443.1	379794	C	T
NW_018164443.1	382354	A	C
NW_018164443.1	382725	G	A
NW_018164443.1	382729	C	T
NW_018164443.1	382881	C	T
NW_018164443.1	383903	T	C
NW_018164443.1	383904	G	A
NW_018164443.1	384124	T	C
NW_018164443.1	385048	T	A
NW_018164443.1	385297	G	C
NW_018164443.1	385302	A	T
NW_018164443.1	385312	T	C
NW_018164443.1	385333	T	C
NW_018164443.1	385339	G	A
NW_018164443.1	388440	A	C
NW_018164443.1	389058	C	T
NW_018164443.1	389060	C	T
NW_018164443.1	399861	C	T
NW_018164443.1	400594	T	C
NW_018164443.1	400634	C	T
NW_018164443.1	400750	C	T
NW_018164443.1	400809	T	G
NW_018164443.1	400838	T	A
NW_018164443.1	423355	A	G
NW_018164443.1	423359	G	T
NW_018164443.1	423363	G	T
NW_018164443.1	423375	A	C
NW_018164443.1	423424	A	C
NW_018164443.1	423507	G	A
NW_018164443.1	423518	A	T
NW_018164443.1	423538	A	C
NW_018164443.1	423552	A	G
NW_018164443.1	423567	G	C
NW_018164443.1	423776	A	C
NW_018164443.1	424184	G	C
NW_018164443.1	427948	A	G
NW_018164443.1	427960	C	T
NW_018164443.1	428658	A	G
NW_018164443.1	428994	T	A
NW_018164443.1	431215	G	A
NW_018164443.1	431248	A	T
NW_018164443.1	431903	T	G
NW_018164443.1	442095	A	T
NW_018164443.1	442098	G	T
NW_018164443.1	443438	T	C
NW_018164443.1	443555	G	T
NW_018164443.1	477635	T	G
NW_018164443.1	477955	G	T
NW_018164443.1	485067	A	T
NW_018164443.1	485429	T	G
NW_018164443.1	485430	A	G
NW_018164443.1	512766	C	T
NW_018164443.1	512770	A	G
NW_018164443.1	512771	C	T
NW_018164443.1	512782	T	C
NW_018164443.1	512797	T	A
NW_018164443.1	512799	A	G
NW_018164443.1	512804	T	G
NW_018164443.1	512836	A	C
NW_018164443.1	512870	C	T
NW_018164443.1	537563	C	A
NW_018164443.1	538385	G	A
NW_018164443.1	542649	G	C
NW_018164443.1	542650	G	A
NW_018164443.1	542651	T	A
NW_018164443.1	542674	G	A
NW_018164443.1	542707	G	A
NW_018164443.1	544462	T	A
NW_018164443.1	544852	T	G
NW_018164443.1	545367	G	T
NW_018164443.1	545629	T	C
NW_018164443.1	546015	T	G
NW_018164443.1	546036	A	G
NW_018164443.1	546043	G	T
NW_018164443.1	551007	T	C
NW_018164443.1	551008	C	A
NW_018164443.1	551800	A	G
NW_018164443.1	551812	T	G
NW_018164443.1	551830	A	T
NW_018164443.1	551851	C	T
NW_018164443.1	551855	G	T
NW_018164443.1	556917	A	T
NW_018164443.1	558235	A	G
NW_018164443.1	558278	A	C
NW_018164443.1	558283	A	T
NW_018164443.1	558317	G	A
NW_018164443.1	558322	T	C
NW_018164443.1	558646	T	A
NW_018164443.1	558881	T	A
NW_018164443.1	558903	C	T
NW_018164443.1	558909	A	T
NW_018164443.1	558912	G	A
NW_018164443.1	558918	C	A
NW_018164443.1	558921	G	A
NW_018164443.1	558935	C	T
NW_018164443.1	559484	A	G
NW_018164443.1	559508	T	C
NW_018164443.1	559519	G	A
NW_018164443.1	559530	A	G
NW_018164443.1	559549	A	C
NW_018164443.1	559556	G	A
NW_018164443.1	559558	A	G
NW_018164443.1	559572	G	A
NW_018164443.1	559580	T	A
NW_018164443.1	559591	T	C
NW_018164443.1	559596	A	C
NW_018164443.1	559623	G	C
NW_018164443.1	559624	T	G
NW_018164443.1	559635	A	C
NW_018164443.1	559640	A	G
NW_018164443.1	559645	A	G
NW_018164443.1	559653	G	C
NW_018164443.1	559655	T	G
NW_018164443.1	560050	A	G
NW_018164443.1	567045	A	T
NW_018164443.1	567068	G	C
NW_018164443.1	567078	C	G
NW_018164443.1	567089	A	T
NW_018164443.1	567096	G	T
NW_018164443.1	567098	A	G
NW_018164443.1	567100	A	T
NW_018164443.1	567107	C	T
NW_018164443.1	567110	A	G
NW_018164443.1	568357	T	C
NW_018164443.1	568599	A	G
NW_018164443.1	568600	T	G
NW_018164443.1	571559	G	A
NW_018164443.1	571680	T	A
NW_018164443.1	571720	C	T
NW_018164443.1	572939	C	T
NW_018164443.1	572940	A	C
NW_018164443.1	572957	G	A
NW_018164443.1	582208	G	A
NW_018164443.1	593591	A	T
NW_018164443.1	594901	C	A
NW_018164443.1	594933	T	A
NW_018164443.1	594969	A	G
NW_018164443.1	594972	A	G
NW_018164443.1	595016	T	C
NW_018164443.1	595033	C	T
NW_018164443.1	595040	G	A
NW_018164443.1	595049	C	G
NW_018164443.1	595281	A	G
NW_018164443.1	596396	A	G
NW_018164443.1	596820	A	T
NW_018164443.1	598329	C	T
NW_018164443.1	598338	G	T
NW_018164443.1	598987	G	T
NW_018164443.1	599607	G	A
NW_018164443.1	599617	G	T
NW_018164443.1	599858	C	A
NW_018164443.1	599959	G	T
NW_018164443.1	600241	A	G
NW_018164443.1	610669	A	G
NW_018164443.1	610678	G	A
NW_018164443.1	610697	T	C
NW_018164443.1	636448	C	A
NW_018164443.1	636459	T	A
NW_018164443.1	636470	A	T
NW_018164443.1	636476	T	C
NW_018164443.1	636487	T	C
NW_018164443.1	636498	C	T
NW_018164443.1	636507	A	T
NW_018164443.1	636512	C	T
NW_018164443.1	636580	G	A
NW_018164443.1	636596	G	T
NW_018164443.1	636600	G	A
NW_018164443.1	636601	C	T
NW_018164443.1	636608	T	A
NW_018164443.1	636614	G	C
NW_018164443.1	636620	G	A
NW_018164443.1	636983	C	A
NW_018164443.1	636985	A	C
NW_018164443.1	636987	T	C
NW_018164443.1	636998	T	C
NW_018164443.1	637008	G	A
NW_018164443.1	637013	A	T
NW_018164443.1	637019	T	C
NW_018164443.1	637024	T	C
NW_018164443.1	680790	C	T
NW_018164443.1	680800	C	T
NW_018164443.1	680829	A	T
NW_018164443.1	681388	T	C
NW_018164443.1	681403	C	T
NW_018164443.1	689574	T	G
NW_018164443.1	706695	G	A
NW_018164443.1	724556	T	A
NW_018164443.1	724561	G	A
NW_018164443.1	728920	A	C
NW_018164443.1	728938	T	G
NW_018164443.1	728961	A	G
NW_018164443.1	728978	C	G
NW_018164443.1	729007	G	A
NW_018164443.1	729012	T	C
NW_018164443.1	729013	C	T
NW_018164443.1	729021	C	T
NW_018164443.1	729035	T	G
NW_018164443.1	729036	A	G
NW_018164443.1	729067	G	A
NW_018164443.1	729510	A	G
NW_018164443.1	729573	G	A
NW_018164443.1	729574	T	C
NW_018164443.1	729581	T	A
NW_018164443.1	729584	C	A
NW_018164443.1	729586	T	A
NW_018164443.1	729587	T	A
NW_018164443.1	729594	C	A
NW_018164443.1	729618	A	G
NW_018164443.1	729988	G	A
NW_018164443.1	729998	G	T
NW_018164443.1	729999	T	A
NW_018164443.1	730026	C	T
NW_018164443.1	730034	C	T
NW_018164443.1	730036	A	G
NW_018164443.1	730165	A	G
NW_018164443.1	730188	C	T
NW_018164443.1	730450	G	C
NW_018164443.1	730772	A	C
NW_018164443.1	731599	T	C
NW_018164443.1	731603	C	T
NW_018164443.1	731799	G	T
NW_018164443.1	732307	T	C
NW_018164443.1	732312	G	C
NW_018164443.1	732324	A	G
NW_018164443.1	732333	A	G
NW_018164443.1	735820	A	G
NW_018164443.1	735824	A	G
NW_018164443.1	737571	A	C
NW_018164443.1	737586	G	C
NW_018164443.1	737730	C	A
NW_018164443.1	737739	C	G
NW_018164443.1	737755	T	G
NW_018164443.1	737768	A	G
NW_018164443.1	737779	T	G
NW_018164443.1	737795	G	A
NW_018164443.1	737802	A	G
NW_018164443.1	737870	T	C
NW_018164443.1	737873	C	G
NW_018164443.1	737916	T	C
NW_018164443.1	737920	T	A
NW_018164443.1	744461	G	T
NW_018164443.1	744677	G	A
NW_018164443.1	744682	G	A
NW_018164443.1	744697	A	G
NW_018164443.1	753071	C	T
NW_018164443.1	758237	A	G
NW_018164443.1	758386	C	A
NW_018164443.1	758406	C	T
NW_018164443.1	758416	A	G
NW_018164443.1	759808	G	A
NW_018164443.1	759824	C	T
NW_018164443.1	761851	T	A
NW_018164443.1	762100	A	T
NW_018164443.1	779111	A	G
NW_018164443.1	779116	T	C
NW_018164443.1	779117	G	C
NW_018164443.1	796429	A	G
NW_018164443.1	796430	G	A
NW_018164443.1	796432	A	T
NW_018164443.1	796496	A	T
NW_018164443.1	801550	T	A
NW_018164443.1	801863	C	T
NW_018164443.1	802190	T	G
NW_018164443.1	802191	A	G
NW_018164443.1	802608	G	T
NW_018164443.1	802609	T	A
NW_018164443.1	802674	C	T
NW_018164443.1	802698	C	A
NW_018164443.1	802702	A	G
NW_018164443.1	802707	G	A
NW_018164443.1	802726	T	C
NW_018164443.1	802733	A	G
NW_018164443.1	802753	T	C
NW_018164443.1	802759	C	T
NW_018164443.1	802921	G	T
NW_018164443.1	812447	T	C
NW_018164443.1	812454	T	C
NW_018164443.1	812457	T	C
NW_018164443.1	812459	G	A
NW_018164443.1	812462	G	C
NW_018164443.1	812463	C	T
NW_018164443.1	812469	T	C
NW_018164443.1	812477	C	T
NW_018164443.1	812479	T	C
NW_018164443.1	813397	G	A
NW_018164443.1	813399	C	T
NW_018164443.1	813401	T	C
NW_018164443.1	813405	C	T
NW_018164443.1	849252	T	C
NW_018164443.1	859413	G	T
NW_018164443.1	859448	C	A
NW_018164443.1	859455	T	A
NW_018164443.1	860324	G	A
NW_018164443.1	862695	C	A
NW_018164443.1	872666	A	G
NW_018164443.1	872667	T	C
NW_018164443.1	881666	C	T
NW_018164443.1	881673	G	T
NW_018164443.1	882282	T	A
NW_018164443.1	883836	T	A
NW_018164443.1	883841	T	A
NW_018164443.1	884269	A	G
NW_018164443.1	885061	G	A
NW_018164443.1	885180	A	G
NW_018164443.1	887334	A	T
NW_018164443.1	889314	G	A
NW_018164443.1	889574	C	A
NW_018164443.1	890145	G	A
NW_018164443.1	890193	G	A
NW_018164443.1	890278	T	A
NW_018164443.1	890281	A	C
NW_018164443.1	890299	T	C
NW_018164443.1	890305	C	T
NW_018164443.1	891117	A	G
NW_018164443.1	891133	T	G
NW_018164443.1	891137	A	G
NW_018164443.1	891139	C	T
NW_018164443.1	893387	A	T
NW_018164443.1	953515	G	T
NW_018164443.1	954384	T	A
NW_018164443.1	954385	T	A
NW_018164443.1	1003494	G	A
NW_018164443.1	1003547	A	C
NW_018164443.1	1003567	G	T
NW_018164443.1	1003577	T	C
NW_018164443.1	1003580	C	T
NW_018164443.1	1003589	A	T
NW_018164443.1	1003595	G	C
NW_018164443.1	1003603	T	G
NW_018164443.1	1003605	T	G
NW_018164443.1	1003607	T	C
NW_018164443.1	1018774	T	C
NW_018164443.1	1018780	A	T
NW_018164443.1	1018786	C	G
NW_018164443.1	1018797	A	G
NW_018164443.1	1018821	C	T
NW_018164443.1	1018827	A	C
NW_018164443.1	1034489	C	G
NW_018164444.1	19154	G	T
NW_018164444.1	19176	C	T
NW_018164444.1	19177	T	C
NW_018164444.1	19309	T	C
NW_018164444.1	19363	T	C
NW_018164444.1	19376	T	C
NW_018164444.1	19396	G	T
NW_018164444.1	19487	A	C
NW_018164444.1	19489	T	C
NW_018164444.1	19496	T	G
NW_018164444.1	52160	T	A
NW_018164444.1	54051	G	T
NW_018164444.1	54169	A	G
NW_018164444.1	54377	C	T
NW_018164444.1	55327	T	C
NW_018164444.1	57418	T	C
NW_018164444.1	57421	T	A
NW_018164444.1	57599	G	A
NW_018164444.1	57601	T	A
NW_018164444.1	91366	A	G
NW_018164444.1	96154	C	T
NW_018164444.1	96158	T	C
NW_018164444.1	96161	T	C
NW_018164444.1	96162	T	C
NW_018164444.1	96169	T	A
NW_018164444.1	96175	C	T
NW_018164444.1	102710	G	A
NW_018164444.1	102769	C	G
NW_018164444.1	103062	A	G
NW_018164444.1	103106	A	T
NW_018164444.1	103417	G	A
NW_018164444.1	103446	G	A
NW_018164444.1	103452	T	C
NW_018164444.1	103456	A	G
NW_018164444.1	103461	A	G
NW_018164444.1	103499	A	C
NW_018164444.1	185096	A	T
NW_018164444.1	187194	C	A
NW_018164444.1	187198	A	G
NW_018164444.1	187199	A	G
NW_018164444.1	187677	C	T
NW_018164444.1	187689	T	C
NW_018164444.1	187715	T	C
NW_018164444.1	187726	G	A
NW_018164444.1	188013	A	C
NW_018164444.1	188059	A	G
NW_018164444.1	188092	T	A
NW_018164444.1	203228	C	T
NW_018164444.1	219706	C	T
NW_018164444.1	223437	G	A
NW_018164444.1	223442	A	G
NW_018164444.1	223480	C	G
NW_018164444.1	223488	A	C
NW_018164444.1	355754	A	C
NW_018164444.1	355762	C	A
NW_018164444.1	355767	G	A
NW_018164444.1	367031	A	T
NW_018164444.1	367037	A	T
NW_018164444.1	399030	C	A
NW_018164444.1	399291	G	A
NW_018164444.1	399337	T	G
NW_018164444.1	400932	G	T
NW_018164444.1	400941	C	A
NW_018164444.1	400954	T	C
NW_018164444.1	401117	T	G
NW_018164444.1	401119	A	G
NW_018164444.1	401465	T	C
NW_018164444.1	401602	C	T
NW_018164444.1	402098	G	C
NW_018164444.1	402541	T	C
NW_018164444.1	402593	T	A
NW_018164444.1	402625	C	T
NW_018164444.1	402646	C	T
NW_018164444.1	402808	C	A
NW_018164444.1	402814	T	G
NW_018164444.1	403012	G	C
NW_018164444.1	404033	C	T
NW_018164444.1	404036	A	C
NW_018164444.1	404041	A	G
NW_018164444.1	404057	C	T
NW_018164444.1	404073	C	T
NW_018164444.1	404338	G	C
NW_018164444.1	405650	T	C
NW_018164444.1	406510	A	T
NW_018164444.1	407658	T	C
NW_018164444.1	407738	C	T
NW_018164444.1	407879	A	G
NW_018164444.1	409184	G	A
NW_018164444.1	409887	C	G
NW_018164444.1	409891	C	A
NW_018164444.1	410205	C	T
NW_018164444.1	410213	C	T
NW_018164444.1	410228	G	T
NW_018164444.1	410244	C	T
NW_018164444.1	410760	T	C
NW_018164444.1	410773	A	G
NW_018164444.1	411481	T	C
NW_018164444.1	468849	A	G
NW_018164444.1	471974	G	A
NW_018164444.1	497055	C	T
NW_018164444.1	498158	T	A
NW_018164444.1	499317	A	T
NW_018164444.1	499844	C	G
NW_018164444.1	499845	G	C
NW_018164444.1	499980	T	C
NW_018164444.1	549208	A	G
NW_018164444.1	549213	A	T
NW_018164444.1	549216	C	T
NW_018164444.1	549377	G	A
NW_018164444.1	549426	C	T
NW_018164444.1	549428	T	G
NW_018164444.1	549443	G	A
NW_018164444.1	551133	G	A
NW_018164444.1	551135	G	C
NW_018164444.1	551153	T	A
NW_018164444.1	551184	C	G
NW_018164444.1	551439	G	A
NW_018164444.1	551441	A	T
NW_018164444.1	551443	G	A
NW_018164444.1	551447	G	A
NW_018164444.1	551908	G	A
NW_018164444.1	552264	C	A
NW_018164444.1	552265	G	A
NW_018164444.1	552311	T	A
NW_018164444.1	552312	A	C
NW_018164444.1	552341	G	C
NW_018164444.1	552342	T	C
NW_018164444.1	552472	C	T
NW_018164444.1	552478	T	G
NW_018164444.1	552483	C	G
NW_018164444.1	552495	C	A
NW_018164444.1	552518	A	T
NW_018164444.1	552519	A	C
NW_018164444.1	552675	A	G
NW_018164444.1	553122	T	A
NW_018164444.1	553129	A	C
NW_018164444.1	553346	C	G
NW_018164444.1	553383	G	T
NW_018164444.1	553708	C	G
NW_018164444.1	553709	A	T
NW_018164444.1	553731	G	T
NW_018164444.1	553780	C	T
NW_018164444.1	553789	C	T
NW_018164444.1	553791	G	C
NW_018164444.1	553918	A	T
NW_018164444.1	553937	G	A
NW_018164444.1	553943	G	A
NW_018164444.1	553956	T	C
NW_018164444.1	553967	G	C
NW_018164444.1	553973	G	A
NW_018164444.1	553979	A	G
NW_018164444.1	553987	T	C
NW_018164444.1	553994	C	T
NW_018164444.1	554015	G	C
NW_018164444.1	555689	A	T
NW_018164444.1	556729	T	C
NW_018164444.1	573392	A	T
NW_018164444.1	573395	A	T
NW_018164444.1	574507	C	T
NW_018164444.1	575473	A	T
NW_018164444.1	592624	T	A
NW_018164444.1	592628	T	C
NW_018164444.1	596986	A	G
NW_018164444.1	596996	C	A
NW_018164444.1	619810	C	T
NW_018164444.1	619846	C	T
NW_018164444.1	619847	A	G
NW_018164444.1	630363	A	G
NW_018164444.1	630376	C	T
NW_018164444.1	630385	A	G
NW_018164444.1	630387	T	A
NW_018164444.1	630419	G	T
NW_018164444.1	630424	C	T
NW_018164444.1	630560	T	C
NW_018164444.1	630582	T	A
NW_018164444.1	632975	G	C
NW_018164444.1	636739	T	G
NW_018164444.1	636765	T	C
NW_018164444.1	637469	C	T
NW_018164444.1	637839	A	T
NW_018164444.1	641162	G	A
NW_018164444.1	642142	A	T
NW_018164444.1	642711	A	T
NW_018164444.1	643161	A	T
NW_018164444.1	643215	T	A
NW_018164444.1	643231	T	C
NW_018164444.1	643883	C	A
NW_018164444.1	643889	G	A
NW_018164444.1	643932	A	G
NW_018164444.1	643968	T	C
NW_018164444.1	643978	A	G
NW_018164444.1	643990	G	T
NW_018164444.1	644414	G	A
NW_018164444.1	646629	T	C
NW_018164444.1	647398	G	A
NW_018164444.1	650034	T	C
NW_018164444.1	650119	C	T
NW_018164444.1	650128	C	T
NW_018164444.1	650266	C	A
NW_018164444.1	650267	C	T
NW_018164444.1	650435	C	T
NW_018164444.1	650562	A	C
NW_018164444.1	663907	C	A
NW_018164444.1	663908	A	G
NW_018164444.1	665716	T	G
NW_018164444.1	665720	T	C
NW_018164444.1	665833	T	C
NW_018164444.1	665872	A	G
NW_018164444.1	666603	C	A
NW_018164444.1	666622	C	T
NW_018164444.1	666632	G	A
NW_018164444.1	667579	T	A
NW_018164444.1	667594	G	C
NW_018164444.1	668002	T	G
NW_018164444.1	671636	T	A
NW_018164444.1	671650	G	A
NW_018164444.1	671657	C	A
NW_018164444.1	671661	A	G
NW_018164444.1	671683	G	T
NW_018164444.1	684881	T	G
NW_018164444.1	684887	A	T
NW_018164444.1	684915	T	A
NW_018164444.1	684957	T	C
NW_018164444.1	684982	G	A
NW_018164444.1	684990	A	C
NW_018164444.1	685422	T	C
NW_018164444.1	685455	A	T
NW_018164444.1	685683	T	C
NW_018164444.1	687981	C	G
NW_018164444.1	687986	G	T
NW_018164444.1	688005	G	A
NW_018164444.1	688008	T	G
NW_018164444.1	688012	A	G
NW_018164444.1	688014	A	C
NW_018164444.1	688037	C	A
NW_018164444.1	688045	G	C
NW_018164444.1	719874	T	G
NW_018164444.1	720207	G	A
NW_018164444.1	720208	G	A
NW_018164444.1	720228	C	A
NW_018164444.1	720237	A	G
NW_018164444.1	720238	T	C
NW_018164444.1	720428	T	A
NW_018164444.1	720429	T	C
NW_018164444.1	720430	G	T
NW_018164444.1	720937	C	T
NW_018164444.1	721873	A	T
NW_018164444.1	721918	C	T
NW_018164444.1	722427	C	T
NW_018164444.1	722449	G	A
NW_018164444.1	722461	A	T
NW_018164444.1	722495	A	G
NW_018164444.1	722688	C	G
NW_018164444.1	722952	T	A
NW_018164444.1	724249	G	A
NW_018164444.1	725065	C	T
NW_018164444.1	725085	G	T
NW_018164444.1	725096	T	C
NW_018164444.1	725098	A	G
NW_018164444.1	725103	T	C
NW_018164444.1	725106	T	G
NW_018164444.1	725116	A	G
NW_018164444.1	725118	T	C
NW_018164444.1	725119	A	C
NW_018164444.1	725136	G	T
NW_018164444.1	725144	T	C
NW_018164444.1	725146	T	C
NW_018164444.1	725173	T	C
NW_018164444.1	725287	T	G
NW_018164444.1	725313	A	T
NW_018164444.1	725482	A	T
NW_018164444.1	725677	T	C
NW_018164444.1	725690	A	C
NW_018164444.1	725769	T	C
NW_018164444.1	727803	T	C
NW_018164444.1	729799	C	T
NW_018164444.1	730404	A	T
NW_018164444.1	732583	C	A
NW_018164444.1	733948	C	T
NW_018164444.1	759884	A	C
NW_018164444.1	759993	C	T
NW_018164444.1	759998	A	C
NW_018164444.1	769339	T	A
NW_018164444.1	769358	A	C
NW_018164444.1	769380	A	G
NW_018164444.1	770247	A	C
NW_018164444.1	770249	A	C
NW_018164444.1	770259	T	G
NW_018164444.1	773273	T	A
NW_018164444.1	775818	T	C
NW_018164444.1	775917	G	A
NW_018164444.1	775921	T	A
NW_018164444.1	775924	T	C
NW_018164444.1	776011	G	T
NW_018164444.1	776015	T	A
NW_018164444.1	776030	T	C
NW_018164444.1	776034	T	C
NW_018164444.1	776045	A	G
NW_018164444.1	776049	C	G
NW_018164444.1	776050	A	G
NW_018164444.1	776080	A	G
NW_018164444.1	776461	C	T
NW_018164444.1	777378	A	G
NW_018164444.1	777379	A	G
NW_018164444.1	777386	A	G
NW_018164444.1	777524	A	C
NW_018164444.1	777539	A	G
NW_018164444.1	778612	C	T
NW_018164444.1	779653	T	C
NW_018164444.1	781131	C	T
NW_018164444.1	781773	G	A
NW_018164444.1	782032	G	A
NW_018164444.1	782056	C	A
NW_018164444.1	782074	T	G
NW_018164444.1	786425	C	T
NW_018164444.1	786441	T	A
NW_018164444.1	786442	G	A
NW_018164444.1	786501	T	C
NW_018164444.1	786552	C	T
NW_018164444.1	786687	C	T
NW_018164444.1	787072	A	G
NW_018164444.1	789450	A	C
NW_018164444.1	789451	T	A
NW_018164444.1	793276	A	T
NW_018164444.1	793280	G	A
NW_018164444.1	793291	C	T
NW_018164444.1	793294	A	G
NW_018164444.1	793295	C	T
NW_018164444.1	793299	A	C
NW_018164444.1	793308	T	G
NW_018164444.1	793670	A	G
NW_018164444.1	794330	C	T
NW_018164444.1	794342	T	A
NW_018164444.1	794344	A	C
NW_018164444.1	794351	A	G
NW_018164444.1	794359	C	T
NW_018164444.1	794404	A	G
NW_018164444.1	795889	A	C
NW_018164444.1	795901	C	T
NW_018164444.1	795912	A	G
NW_018164444.1	795943	A	C
NW_018164444.1	795959	T	A
NW_018164444.1	796001	A	G
NW_018164444.1	796002	A	G
NW_018164444.1	797900	C	T
NW_018164444.1	802448	G	C
NW_018164444.1	809975	A	G
NW_018164444.1	949399	T	C
NW_018164444.1	949400	T	C
NW_018164444.1	960003	C	T
NW_018164444.1	960012	G	T
NW_018164444.1	960025	T	G
NW_018164444.1	960039	C	G
NW_018164444.1	960046	T	A
NW_018164444.1	960076	T	G
NW_018164444.1	960094	G	T
NW_018164444.1	960105	T	C
NW_018164444.1	960124	A	T
NW_018164444.1	960203	G	A
NW_018164444.1	960513	A	T
NW_018164444.1	980860	T	G
NW_018164444.1	1016649	C	T
NW_018164444.1	1019262	T	C
NW_018164444.1	1032369	T	A
NW_018164444.1	1032402	T	A
NW_018164444.1	1032406	C	G
NW_018164444.1	1032434	A	G
NW_018164444.1	1032435	C	G
NW_018164444.1	1033251	T	A
NW_018164444.1	1082963	A	G
NW_018164444.1	1082964	T	G
NW_018164444.1	1082971	A	C
NW_018164444.1	1082978	C	T
NW_018164444.1	1082984	A	T
NW_018164444.1	1082985	G	A
NW_018164444.1	1082991	G	C
NW_018164444.1	1083000	C	T
NW_018164444.1	1083012	A	T
NW_018164444.1	1083013	G	A
NW_018164444.1	1083852	C	A
NW_018164444.1	1083853	T	G
NW_018164444.1	1083855	C	A
NW_018164444.1	1083857	T	C
NW_018164444.1	1083859	G	T
NW_018164444.1	1083863	A	G
NW_018164444.1	1083864	A	G
NW_018164444.1	1084455	C	A
NW_018164444.1	1084649	A	T
NW_018164444.1	1085509	G	T
NW_018164444.1	1086783	A	G
NW_018164444.1	1086804	C	A
NW_018164444.1	1086817	A	T
NW_018164444.1	1086819	A	T
NW_018164444.1	1086820	T	G
NW_018164444.1	1086822	A	G
NW_018164444.1	1086873	T	A
NW_018164444.1	1087170	C	T
NW_018164444.1	1087174	T	A
NW_018164444.1	1087175	T	C
NW_018164444.1	1087689	G	A
NW_018164444.1	1087691	A	T
NW_018164444.1	1087695	G	A
NW_018164444.1	1087785	A	G
NW_018164444.1	1087786	C	A
NW_018164444.1	1088457	C	A
NW_018164444.1	1090672	T	A
NW_018164444.1	1090674	G	A
NW_018164444.1	1090680	C	T
NW_018164444.1	1090688	T	A
NW_018164444.1	1090698	T	G
NW_018164444.1	1090701	A	G
NW_018164444.1	1090705	C	T
NW_018164444.1	1090707	T	G
NW_018164444.1	1090714	G	A
NW_018164444.1	1093156	C	A
NW_018164444.1	1093288	T	A
NW_018164444.1	1093654	C	G
NW_018164444.1	1093666	T	C
NW_018164444.1	1093668	G	A
NW_018164444.1	1093693	A	C
NW_018164444.1	1093697	G	T
NW_018164444.1	1093713	G	A
NW_018164444.1	1094538	C	T
NW_018164444.1	1094700	C	A
NW_018164444.1	1094708	G	A
NW_018164444.1	1094711	A	T
NW_018164444.1	1094713	G	T
NW_018164444.1	1094741	T	C
NW_018164444.1	1094762	A	T
NW_018164444.1	1094773	T	A
NW_018164444.1	1094796	A	G
NW_018164444.1	1096632	C	T
NW_018164444.1	1099748	C	A
NW_018164444.1	1099822	A	G
NW_018164444.1	1100076	C	A
NW_018164444.1	1100571	G	A
NW_018164444.1	1100626	T	A
NW_018164444.1	1100664	C	T
NW_018164444.1	1100673	C	A
NW_018164444.1	1100680	C	T
NW_018164444.1	1100698	T	G
NW_018164444.1	1100710	T	C
NW_018164444.1	1100711	G	A
NW_018164444.1	1100720	C	T
NW_018164444.1	1100934	T	A
NW_018164444.1	1100961	A	C
NW_018164444.1	1100999	G	A
NW_018164444.1	1101171	T	C
NW_018164444.1	1101182	A	C
NW_018164444.1	1101186	A	C
NW_018164444.1	1101187	T	C
NW_018164444.1	1101384	G	C
NW_018164444.1	1101391	G	A
NW_018164444.1	1101395	T	A
NW_018164444.1	1101406	C	T
NW_018164444.1	1101408	T	C
NW_018164444.1	1101421	G	A
NW_018164444.1	1101453	G	A
NW_018164444.1	1101454	C	T
NW_018164444.1	1101458	T	G
NW_018164444.1	1101459	C	T
NW_018164444.1	1101461	A	G
NW_018164444.1	1101476	T	C
NW_018164444.1	1101480	G	A
NW_018164444.1	1101484	T	G
NW_018164444.1	1101486	T	C
NW_018164444.1	1101490	G	A
NW_018164444.1	1101499	C	T
NW_018164444.1	1101511	G	A
NW_018164444.1	1101517	G	A
NW_018164444.1	1101521	C	A
NW_018164444.1	1101529	A	G
NW_018164444.1	1101537	A	G
NW_018164444.1	1101703	A	G
NW_018164444.1	1101708	A	C
NW_018164444.1	1101717	T	C
NW_018164444.1	1101729	A	C
NW_018164444.1	1101741	T	G
NW_018164444.1	1101761	C	T
NW_018164444.1	1101766	T	G
NW_018164444.1	1132765	A	G
NW_018164444.1	1132769	A	G
NW_018164444.1	1132785	A	G
NW_018164444.1	1132809	T	G
NW_018164444.1	1132813	T	C
NW_018164444.1	1133314	A	G
NW_018164444.1	1133319	C	T
NW_018164444.1	1139799	G	C
NW_018164444.1	1146741	C	A
NW_018164444.1	1146745	T	A
NW_018164444.1	1150977	A	G
NW_018164444.1	1150994	T	A
NW_018164444.1	1154523	T	A
NW_018164444.1	1154544	T	C
NW_018164444.1	1154551	T	C
NW_018164444.1	1154555	G	A
NW_018164444.1	1154557	A	T
NW_018164444.1	1154558	T	C
NW_018164444.1	1154633	G	A
NW_018164444.1	1157363	G	A
NW_018164444.1	1157375	A	C
NW_018164444.1	1157376	T	G
NW_018164444.1	1184731	C	T
NW_018164444.1	1184762	C	T
NW_018164444.1	1184802	A	C
NW_018164444.1	1191003	C	G
NW_018164444.1	1220555	A	T
NW_018164444.1	1220592	A	T
NW_018164444.1	1220602	A	T
NW_018164444.1	1220925	T	C
NW_018164444.1	1221127	A	G
NW_018164444.1	1221150	A	T
NW_018164444.1	1225027	T	C
NW_018164444.1	1225062	G	C
NW_018164444.1	1225069	G	A
NW_018164444.1	1225119	A	T
NW_018164444.1	1235245	T	C
NW_018164444.1	1235296	A	G
NW_018164444.1	1236815	G	A
NW_018164444.1	1260820	G	T
NW_018164444.1	1260828	G	C
NW_018164444.1	1262184	A	C
NW_018164444.1	1317758	G	C
NW_018164444.1	1317783	G	T
NW_018164444.1	1317804	G	T
NW_018164444.1	1317806	C	G
NW_018164444.1	1318003	C	A
NW_018164444.1	1318022	G	A
NW_018164444.1	1318076	T	C
NW_018164444.1	1318087	G	A
NW_018164444.1	1332634	A	G
NW_018164444.1	1332653	T	G
NW_018164444.1	1335932	G	A
NW_018164444.1	1354588	T	A
NW_018164444.1	1354599	G	T
NW_018164444.1	1354609	T	C
NW_018164444.1	1354611	T	A
NW_018164444.1	1384285	A	G
NW_018164444.1	1384292	T	C
NW_018164444.1	1384300	A	G
NW_018164444.1	1384301	A	G
NW_018164444.1	1384303	T	C
NW_018164444.1	1399001	C	G
NW_018164444.1	1399003	A	G
NW_018164444.1	1421384	T	A
NW_018164444.1	1421386	G	A
NW_018164444.1	1421394	A	G
NW_018164444.1	1426809	A	T
NW_018164444.1	1443972	A	T
NW_018164444.1	1443981	A	T
NW_018164444.1	1443994	T	C
NW_018164444.1	1444002	C	T
NW_018164444.1	1444011	T	C
NW_018164444.1	1444014	G	T
NW_018164444.1	1444045	C	T
NW_018164444.1	1444048	G	T
NW_018164444.1	1444064	G	T
NW_018164444.1	1444223	A	T
NW_018164444.1	1521897	T	C
NW_018164444.1	1521898	T	C
NW_018164444.1	1521903	T	C
NW_018164444.1	1522051	G	T
NW_018164444.1	1603979	A	G
NW_018164444.1	1603988	G	T
NW_018164444.1	1603990	A	T
NW_018164444.1	1608278	T	A
NW_018164444.1	1608761	A	G
NW_018164444.1	1608764	A	G
NW_018164444.1	1608776	A	G
NW_018164444.1	1608779	A	G
NW_018164444.1	1611938	G	A
NW_018164444.1	1621320	T	G
NW_018164444.1	1621326	A	G
NW_018164444.1	1621336	A	T
NW_018164444.1	1621342	G	A
NW_018164444.1	1621361	G	C
NW_018164444.1	1630009	G	C
NW_018164444.1	1630017	G	A
NW_018164444.1	1630023	G	T
NW_018164444.1	1630026	A	G
NW_018164444.1	1630034	C	A
NW_018164444.1	1630039	G	A
NW_018164444.1	1630040	G	A
NW_018164444.1	1681812	T	A
NW_018164444.1	1682617	T	A
NW_018164444.1	1687277	C	A
NW_018164444.1	1687285	G	A
NW_018164444.1	1687306	C	T
NW_018164444.1	1699081	G	C
NW_018164444.1	1699082	A	C
NW_018164444.1	1699477	A	G
NW_018164444.1	1699478	A	G
NW_018164444.1	1702364	A	T
NW_018164444.1	1702403	C	A
NW_018164444.1	1702808	A	G
NW_018164444.1	1702809	A	G
NW_018164444.1	1702835	G	A
NW_018164444.1	1702836	T	A
NW_018164444.1	1702843	T	C
NW_018164444.1	1702847	T	A
NW_018164444.1	1702864	A	C
NW_018164444.1	1702865	A	T
NW_018164444.1	1702875	G	C
NW_018164444.1	1702877	T	A
NW_018164444.1	1702885	A	G
NW_018164444.1	1702906	A	T
NW_018164444.1	1703015	A	G
NW_018164444.1	1703017	T	G
NW_018164444.1	1703029	A	C
NW_018164444.1	1703035	T	G
NW_018164444.1	1703060	A	G
NW_018164444.1	1703061	A	G
NW_018164444.1	1703069	T	C
NW_018164444.1	1703220	T	C
NW_018164444.1	1703224	C	G
NW_018164444.1	1703241	G	A
NW_018164444.1	1703256	A	T
NW_018164444.1	1747494	C	T
NW_018164444.1	1755197	A	C
NW_018164444.1	1755359	T	C
NW_018164444.1	1757536	C	T
NW_018164444.1	1757605	G	A
NW_018164444.1	1757606	A	C
NW_018164444.1	1757862	T	C
NW_018164444.1	1766983	A	T
NW_018164444.1	1768936	G	A
NW_018164444.1	1768937	A	C
NW_018164444.1	1768963	A	C
NW_018164444.1	1769042	A	G
NW_018164444.1	1769540	G	A
NW_018164444.1	1769544	A	G
NW_018164444.1	1769561	G	A
NW_018164444.1	1769573	T	C
NW_018164444.1	1776801	G	A
NW_018164444.1	1814428	A	G
NW_018164444.1	1814758	T	A
NW_018164444.1	1816175	T	C
NW_018164444.1	1816229	G	T
NW_018164444.1	1816230	T	A
NW_018164444.1	1816251	A	G
NW_018164444.1	1816266	C	T
NW_018164444.1	1817501	A	C
NW_018164444.1	1825073	C	A
NW_018164444.1	1825084	G	A
NW_018164444.1	1825087	C	G
NW_018164444.1	1825117	A	C
NW_018164444.1	1848505	A	G
NW_018164444.1	1848684	G	A
NW_018164444.1	1848728	A	C
NW_018164444.1	1848729	C	G
NW_018164444.1	1848743	C	A
NW_018164444.1	1848747	A	G
NW_018164444.1	1848773	A	C
NW_018164444.1	1848774	T	A
NW_018164444.1	1902819	C	T
NW_018164444.1	1902828	C	G
NW_018164444.1	2009687	T	C
NW_018164444.1	2009689	T	C
NW_018164444.1	2010580	A	G
NW_018164444.1	2010599	T	C
NW_018164444.1	2013715	T	G
NW_018164444.1	2013718	A	C
NW_018164444.1	2013725	T	G
NW_018164444.1	2018419	T	G
NW_018164444.1	2018469	T	A
NW_018164444.1	2026593	C	T
NW_018164444.1	2030483	A	G
NW_018164444.1	2030497	T	C
NW_018164444.1	2031921	A	G
NW_018164444.1	2040809	C	T
NW_018164444.1	2040827	T	C
NW_018164444.1	2040830	A	C
NW_018164444.1	2040832	T	C
NW_018164444.1	2040834	G	C
NW_018164444.1	2040839	T	C
NW_018164444.1	2040841	T	C
NW_018164444.1	2041135	G	A
NW_018164444.1	2042383	C	T
NW_018164444.1	2059856	C	T
NW_018164444.1	2059867	C	T
NW_018164444.1	2080802	C	T
NW_018164444.1	2105039	A	C
NW_018164444.1	2105041	A	T
NW_018164444.1	2105053	T	C
NW_018164444.1	2105237	T	A
NW_018164444.1	2105242	C	T
NW_018164444.1	2105248	C	T
NW_018164444.1	2105258	G	A
NW_018164444.1	2106051	C	A
NW_018164444.1	2110662	A	C
NW_018164444.1	2133711	G	C
NW_018164444.1	2133713	A	C
NW_018164444.1	2133746	A	C
NW_018164444.1	2133758	T	C
NW_018164444.1	2133765	G	A
NW_018164444.1	2133788	T	A
NW_018164444.1	2133812	C	T
NW_018164444.1	2136593	G	T
NW_018164444.1	2136932	T	G
NW_018164444.1	2136979	C	T
NW_018164444.1	2136980	T	G
NW_018164444.1	2137725	T	A
NW_018164444.1	2137826	C	A
NW_018164444.1	2137845	T	A
NW_018164444.1	2137846	G	A
NW_018164444.1	2137847	T	C
NW_018164444.1	2137873	T	A
NW_018164444.1	2137881	G	A
NW_018164444.1	2137890	A	G
NW_018164444.1	2137901	A	T
NW_018164444.1	2137902	G	A
NW_018164444.1	2140963	C	T
NW_018164444.1	2140964	T	C
NW_018164444.1	2142343	A	T
NW_018164444.1	2142770	G	C
NW_018164444.1	2142775	A	C
NW_018164444.1	2142790	T	G
NW_018164444.1	2142802	T	G
NW_018164444.1	2142803	C	T
NW_018164444.1	2142822	T	G
NW_018164444.1	2142828	C	T
NW_018164444.1	2166514	A	T
NW_018164444.1	2171190	T	G
NW_018164444.1	2171192	G	A
NW_018164444.1	2172363	T	C
NW_018164444.1	2172365	G	A
NW_018164444.1	2176508	A	C
NW_018164444.1	2176797	C	A
NW_018164444.1	2176804	T	A
NW_018164444.1	2176808	C	A
NW_018164444.1	2176814	T	A
NW_018164444.1	2176827	T	A
NW_018164444.1	2178329	T	C
NW_018164444.1	2178339	C	A
NW_018164444.1	2178360	T	A
NW_018164444.1	2178500	G	A
NW_018164444.1	2178505	C	T
NW_018164444.1	2178515	A	G
NW_018164444.1	2178541	G	A
NW_018164444.1	2178549	T	A
NW_018164444.1	2178551	G	A
NW_018164444.1	2178584	A	G
NW_018164444.1	2178625	A	G
NW_018164444.1	2178636	G	A
NW_018164444.1	2178919	A	T
NW_018164444.1	2178920	G	A
NW_018164444.1	2178922	T	A
NW_018164444.1	2178929	A	T
NW_018164444.1	2183968	T	C
NW_018164444.1	2183974	A	G
NW_018164444.1	2183986	A	C
NW_018164444.1	2183989	A	C
NW_018164444.1	2183990	A	C
NW_018164444.1	2184008	G	A
NW_018164444.1	2184199	T	A
NW_018164444.1	2186382	A	C
NW_018164444.1	2199646	A	C
NW_018164444.1	2199754	A	G
NW_018164444.1	2199834	G	C
NW_018164444.1	2200031	A	T
NW_018164444.1	2246547	A	G
NW_018164444.1	2247733	G	A
NW_018164444.1	2278684	C	A
NW_018164444.1	2300055	T	C
NW_018164444.1	2317858	A	T
NW_018164444.1	2321139	G	T
NW_018164444.1	2321140	A	T
NW_018164444.1	2321167	A	T
NW_018164444.1	2321168	T	C
NW_018164444.1	2321177	T	G
NW_018164444.1	2321178	T	A
NW_018164444.1	2321203	A	T
NW_018164444.1	2321209	T	G
NW_018164444.1	2321239	A	T
NW_018164444.1	2321243	A	C
NW_018164444.1	2333597	G	A
NW_018164444.1	2333606	C	G
NW_018164444.1	2351667	A	G
NW_018164444.1	2352154	G	A
NW_018164444.1	2352157	G	A
NW_018164444.1	2385623	A	T
NW_018164444.1	2385637	C	T
NW_018164444.1	2385670	G	T
NW_018164444.1	2385870	G	C
NW_018164444.1	2386262	T	C
NW_018164444.1	2386567	G	A
NW_018164444.1	2386581	A	T
NW_018164444.1	2386583	G	T
NW_018164444.1	2386584	G	T
NW_018164444.1	2420693	A	C
NW_018164444.1	2436779	A	T
NW_018164444.1	2438879	A	G
NW_018164444.1	2439435	T	A
NW_018164444.1	2439437	A	G
NW_018164444.1	2439458	A	G
NW_018164444.1	2439466	A	C
NW_018164444.1	2439468	C	T
NW_018164444.1	2439590	C	A
NW_018164444.1	2440083	T	C
NW_018164444.1	2440097	G	A
NW_018164444.1	2440098	C	T
NW_018164444.1	2441904	T	A
NW_018164444.1	2443935	A	C
NW_018164444.1	2546880	C	T
NW_018164444.1	2546883	G	T
NW_018164444.1	2547472	A	T
NW_018164444.1	2547488	G	T
NW_018164444.1	2547746	T	A
NW_018164444.1	2550932	G	A
NW_018164444.1	2551045	T	C
NW_018164444.1	2551119	A	T
NW_018164444.1	2551121	A	T
NW_018164444.1	2560288	T	C
NW_018164444.1	2561243	C	A
NW_018164444.1	2561249	A	T
NW_018164444.1	2561250	A	C
NW_018164444.1	2561259	T	A
NW_018164444.1	2561263	A	G
NW_018164444.1	2561274	T	G
NW_018164444.1	2561290	T	A
NW_018164444.1	2561312	A	G
NW_018164444.1	2561331	G	T
NW_018164444.1	2572106	A	G
NW_018164444.1	2572112	A	T
NW_018164444.1	2572146	G	T
NW_018164444.1	2573433	G	A
NW_018164444.1	2573475	G	C
NW_018164444.1	2573479	A	T
NW_018164444.1	2573482	A	C
NW_018164444.1	2573488	A	T
NW_018164444.1	2573493	A	G
NW_018164444.1	2573529	G	A
NW_018164444.1	2580906	T	C
NW_018164444.1	2580908	C	T
NW_018164444.1	2580936	T	G
NW_018164444.1	2580960	C	T
NW_018164444.1	2581088	A	T
NW_018164444.1	2581443	C	A
NW_018164444.1	2581454	T	A
NW_018164444.1	2581472	G	T
NW_018164444.1	2581478	T	A
NW_018164444.1	2582398	T	C
NW_018164444.1	2582400	A	G
NW_018164444.1	2582426	G	A
NW_018164444.1	2582450	T	C
NW_018164444.1	2582500	G	A
NW_018164444.1	2582643	T	G
NW_018164444.1	2582706	T	C
NW_018164444.1	2582711	C	T
NW_018164444.1	2582713	T	C
NW_018164444.1	2583391	C	T
NW_018164444.1	2583408	C	T
NW_018164444.1	2583445	A	G
NW_018164444.1	2583457	T	C
NW_018164444.1	2583560	A	T
NW_018164444.1	2583571	A	C
NW_018164444.1	2583586	A	C
NW_018164444.1	2583589	G	A
NW_018164444.1	2583590	A	T
NW_018164444.1	2583597	C	T
NW_018164444.1	2583601	T	C
NW_018164444.1	2583603	T	C
NW_018164444.1	2584214	A	T
NW_018164444.1	2584238	G	T
NW_018164444.1	2584266	C	G
NW_018164444.1	2584290	G	T
NW_018164444.1	2586204	C	T
NW_018164444.1	2624171	A	G
NW_018164444.1	2636613	G	T
NW_018164444.1	2636615	T	C
NW_018164444.1	2636760	A	T
NW_018164444.1	2636765	C	T
NW_018164444.1	2649789	A	G
NW_018164444.1	2651038	C	T
NW_018164444.1	2651124	C	T
NW_018164444.1	2658517	T	A
NW_018164444.1	2688879	A	T
NW_018164444.1	2690231	G	A
NW_018164444.1	2690232	C	G
NW_018164444.1	2692044	T	C
NW_018164444.1	2702134	G	A
NW_018164444.1	2770072	T	A
NW_018164444.1	2770074	T	A
NW_018164444.1	2770730	A	G
NW_018164444.1	2771082	A	G
NW_018164444.1	2771084	A	G
NW_018164444.1	2773401	T	C
NW_018164444.1	2773904	C	T
NW_018164444.1	2773906	G	A
NW_018164444.1	2774655	T	A
NW_018164444.1	2775016	C	T
NW_018164444.1	2775058	G	A
NW_018164444.1	2775439	C	T
NW_018164444.1	2775440	T	C
NW_018164444.1	2776091	G	A
NW_018164444.1	2776106	T	C
NW_018164444.1	2776119	A	T
NW_018164444.1	2776139	C	T
NW_018164444.1	2776140	G	A
NW_018164444.1	2776153	G	A
NW_018164444.1	2776165	C	T
NW_018164444.1	2776352	C	A
NW_018164444.1	2776356	G	A
NW_018164444.1	2776370	C	T
NW_018164444.1	2776379	C	T
NW_018164444.1	2776382	C	T
NW_018164444.1	2776406	A	G
NW_018164444.1	2776424	G	T
NW_018164444.1	2776430	G	A
NW_018164444.1	2776561	C	T
NW_018164444.1	2776616	G	A
NW_018164444.1	2776619	G	A
NW_018164444.1	2776621	G	A
NW_018164444.1	2776623	G	A
NW_018164444.1	2776625	G	A
NW_018164444.1	2776627	G	A
NW_018164444.1	2776628	G	A
NW_018164444.1	2776629	G	A
NW_018164444.1	2776632	G	A
NW_018164444.1	2777180	A	T
NW_018164444.1	2777252	T	A
NW_018164444.1	2777624	T	C
NW_018164444.1	2778580	T	A
NW_018164444.1	2778586	G	A
NW_018164444.1	2778601	T	C
NW_018164444.1	2778635	A	C
NW_018164444.1	2779029	A	C
NW_018164444.1	2779398	A	T
NW_018164444.1	2813980	T	G
NW_018164444.1	2817935	T	C
NW_018164444.1	2817943	C	T
NW_018164444.1	2817957	T	C
NW_018164444.1	2833878	C	T
NW_018164444.1	2833987	G	T
NW_018164444.1	2835744	A	T
NW_018164444.1	2836497	A	G
NW_018164444.1	2836514	G	T
NW_018164444.1	2836530	G	A
NW_018164444.1	2836557	C	T
NW_018164444.1	2836582	T	A
NW_018164444.1	2836583	A	C
NW_018164444.1	2836603	A	G
NW_018164444.1	2837922	T	G
NW_018164444.1	2837925	T	G
NW_018164444.1	2837926	T	G
NW_018164444.1	2839367	C	T
NW_018164444.1	2839372	C	G
NW_018164444.1	2840470	C	A
NW_018164444.1	2852695	G	A
NW_018164444.1	2861916	A	T
NW_018164444.1	2861968	A	C
NW_018164444.1	2861974	A	G
NW_018164444.1	2862466	C	G
NW_018164444.1	2862467	T	G
NW_018164444.1	2863706	T	A
NW_018164444.1	2863717	T	A
NW_018164444.1	2863780	C	T
NW_018164444.1	2863793	T	A
NW_018164444.1	2978796	C	T
NW_018164444.1	2979149	A	T
NW_018164444.1	2979201	A	G
NW_018164444.1	2979920	G	C
NW_018164444.1	2980055	T	C
NW_018164444.1	2980056	C	T
NW_018164444.1	2980057	G	T
NW_018164444.1	2980059	T	A
NW_018164444.1	2980787	C	T
NW_018164444.1	2980831	A	G
NW_018164444.1	2980845	G	A
NW_018164444.1	2980856	G	A
NW_018164444.1	2980867	A	T
NW_018164444.1	2980875	C	T
NW_018164444.1	2980876	C	T
NW_018164444.1	2980898	G	A
NW_018164444.1	2980902	G	A
NW_018164444.1	2980928	C	T
NW_018164444.1	2980931	G	A
NW_018164444.1	2985521	G	T
NW_018164444.1	2990835	A	G
NW_018164444.1	2990836	A	G
NW_018164444.1	2990839	A	G
NW_018164444.1	2991050	A	C
NW_018164444.1	2991051	C	A
NW_018164444.1	2991053	C	G
NW_018164444.1	2991087	A	T
NW_018164444.1	2991093	A	C
NW_018164444.1	2991100	A	G
NW_018164444.1	2991332	C	T
NW_018164444.1	2991369	G	C
NW_018164444.1	2991382	A	T
NW_018164444.1	3041646	C	T
NW_018164444.1	3041682	G	C
NW_018164444.1	3041712	T	C
NW_018164444.1	3041714	G	A
NW_018164444.1	3041725	T	C
NW_018164444.1	3041727	G	A
NW_018164444.1	3041730	G	A
NW_018164444.1	3041742	C	G
NW_018164444.1	3041748	G	T
NW_018164444.1	3041749	C	T
NW_018164444.1	3041754	A	T
NW_018164444.1	3041779	C	A
NW_018164444.1	3041782	G	A
NW_018164444.1	3041806	C	T
NW_018164444.1	3057925	C	G
NW_018164444.1	3057983	A	G
NW_018164444.1	3058095	A	G
NW_018164444.1	3058098	A	C
NW_018164444.1	3058105	C	T
NW_018164444.1	3058528	C	A
NW_018164444.1	3058745	A	T
NW_018164444.1	3059522	C	G
NW_018164444.1	3059525	C	G
NW_018164444.1	3059528	A	G
NW_018164444.1	3059529	C	A
NW_018164444.1	3059535	C	A
NW_018164444.1	3062334	A	T
NW_018164444.1	3062420	G	A
NW_018164444.1	3062428	T	G
NW_018164444.1	3062453	A	C
NW_018164444.1	3062482	C	T
NW_018164444.1	3062483	C	T
NW_018164444.1	3062982	C	T
NW_018164444.1	3062986	T	A
NW_018164444.1	3062993	A	G
NW_018164444.1	3063140	T	A
NW_018164444.1	3063594	G	A
NW_018164444.1	3063611	T	G
NW_018164444.1	3063699	T	G
NW_018164444.1	3077407	T	A
NW_018164444.1	3130223	C	T
NW_018164444.1	3144070	G	A
NW_018164444.1	3144073	G	A
NW_018164444.1	3144075	A	C
NW_018164444.1	3144118	G	A
NW_018164444.1	3144120	A	T
NW_018164444.1	3144158	A	T
NW_018164444.1	3155081	C	A
NW_018164444.1	3155082	G	A
NW_018164444.1	3169333	A	C
NW_018164444.1	3169347	C	T
NW_018164444.1	3169358	A	G
NW_018164444.1	3169359	C	A
NW_018164444.1	3169365	T	C
NW_018164444.1	3169376	T	A
NW_018164444.1	3173241	C	T
NW_018164444.1	3173997	C	T
NW_018164444.1	3175148	T	C
NW_018164444.1	3177205	C	T
NW_018164444.1	3178114	G	C
NW_018164444.1	3178129	T	A
NW_018164444.1	3178259	A	T
NW_018164444.1	3178785	A	G
NW_018164444.1	3179369	G	A
NW_018164444.1	3179372	G	A
NW_018164444.1	3179797	A	G
NW_018164444.1	3187896	C	G
NW_018164444.1	3188310	T	A
NW_018164444.1	3188342	T	C
NW_018164444.1	3188650	A	C
NW_018164444.1	3189202	G	T
NW_018164444.1	3189631	G	A
NW_018164444.1	3232793	C	T
NW_018164444.1	3232800	G	T
NW_018164444.1	3315260	A	C
NW_018164444.1	3394943	A	T
NW_018164444.1	3402481	A	G
NW_018164444.1	3402482	G	A
NW_018164444.1	3403061	C	G
NW_018164444.1	3403063	T	C
NW_018164444.1	3403070	A	G
NW_018164444.1	3403152	A	T
NW_018164444.1	3403159	G	A
NW_018164444.1	3403807	G	A
NW_018164444.1	3403818	G	A
NW_018164444.1	3403821	C	T
NW_018164444.1	3403829	G	T
NW_018164444.1	3403844	T	G
NW_018164444.1	3405582	C	G
NW_018164444.1	3405943	T	C
NW_018164444.1	3406009	T	C
NW_018164444.1	3406010	T	C
NW_018164444.1	3406016	G	C
NW_018164444.1	3406019	G	A
NW_018164444.1	3406228	G	A
NW_018164444.1	3406348	A	G
NW_018164444.1	3406365	A	G
NW_018164444.1	3406408	T	C
NW_018164444.1	3406436	A	G
NW_018164444.1	3407007	A	C
NW_018164444.1	3407541	T	C
NW_018164444.1	3408496	T	C
NW_018164444.1	3408503	T	C
NW_018164444.1	3408510	C	T
NW_018164444.1	3409077	C	T
NW_018164444.1	3409584	A	G
NW_018164444.1	3409957	C	T
NW_018164444.1	3409966	C	T
NW_018164444.1	3409967	C	G
NW_018164444.1	3411293	C	T
NW_018164444.1	3412587	C	T
NW_018164444.1	3412817	G	C
NW_018164444.1	3413031	A	G
NW_018164444.1	3453408	G	A
NW_018164444.1	3455654	A	T
NW_018164444.1	3455658	T	A
NW_018164444.1	3455662	A	T
NW_018164444.1	3455695	G	A
NW_018164444.1	3457135	T	C
NW_018164444.1	3457454	T	G
NW_018164444.1	3457843	G	A
NW_018164444.1	3457847	C	A
NW_018164444.1	3457865	A	G
NW_018164444.1	3459440	A	T
NW_018164444.1	3459973	A	T
NW_018164444.1	3461513	T	G
NW_018164444.1	3478710	T	C
NW_018164444.1	3478731	T	C
NW_018164444.1	3515528	C	G
NW_018164444.1	3519942	C	T
NW_018164444.1	3519976	C	T
NW_018164444.1	3520028	G	C
NW_018164444.1	3559744	G	A
NW_018164444.1	3559750	A	G
NW_018164444.1	3560025	C	T
NW_018164444.1	3560511	C	T
NW_018164444.1	3593412	G	A
NW_018164444.1	3593414	A	G
NW_018164444.1	3593424	T	C
NW_018164444.1	3593462	G	A
NW_018164444.1	3593503	A	T
NW_018164444.1	3593518	A	G
NW_018164444.1	3594847	T	C
NW_018164444.1	3594901	A	T
NW_018164444.1	3617573	T	C
NW_018164444.1	3619504	A	T
NW_018164444.1	3656663	C	A
NW_018164444.1	3659084	G	A
NW_018164444.1	3659861	A	T
NW_018164444.1	3660035	G	A
NW_018164444.1	3660037	G	A
NW_018164444.1	3660038	C	T
NW_018164444.1	3660044	C	T
NW_018164444.1	3660188	A	C
NW_018164444.1	3662599	G	A
NW_018164444.1	3663440	G	A
NW_018164444.1	3663733	C	T
NW_018164444.1	3664078	C	T
NW_018164444.1	3664414	C	A
NW_018164444.1	3664511	C	A
NW_018164444.1	3695863	A	T
NW_018164444.1	3710351	A	T
NW_018164444.1	3710413	G	T
NW_018164444.1	3710848	C	A
NW_018164444.1	3710867	C	T
NW_018164444.1	3714269	C	A
NW_018164444.1	3714273	A	T
NW_018164444.1	3717495	G	T
NW_018164444.1	3717496	A	G
NW_018164444.1	3717517	C	G
NW_018164444.1	3717537	G	A
NW_018164444.1	3717547	A	C
NW_018164444.1	3717574	C	G
NW_018164444.1	3726887	G	A
NW_018164444.1	3729933	T	C
NW_018164444.1	3729934	G	A
NW_018164444.1	3793211	C	T
NW_018164444.1	3793226	A	G
NW_018164444.1	3793229	G	A
NW_018164444.1	3793745	C	T
NW_018164444.1	3793757	T	C
NW_018164444.1	3803208	G	A
NW_018164444.1	3803210	C	T
NW_018164444.1	3810955	T	C
NW_018164444.1	3810963	G	A
NW_018164444.1	3812074	T	C
NW_018164444.1	3812075	C	T
NW_018164444.1	3813838	C	T
NW_018164444.1	3814804	T	C
NW_018164444.1	3814809	G	T
NW_018164444.1	3815280	G	A
NW_018164444.1	3815476	G	A
NW_018164444.1	3815477	T	A
NW_018164444.1	3815487	G	T
NW_018164444.1	3815489	G	T
NW_018164444.1	3815517	G	T
NW_018164444.1	3815533	G	C
NW_018164444.1	3815542	T	A
NW_018164444.1	3838557	A	T
NW_018164444.1	3838579	C	T
NW_018164444.1	3838589	G	T
NW_018164444.1	3838605	G	A
NW_018164444.1	3838616	A	G
NW_018164444.1	3839249	G	T
NW_018164444.1	3839523	C	A
NW_018164444.1	3839530	G	T
NW_018164444.1	3839540	C	T
NW_018164444.1	3944390	T	A
NW_018164444.1	3944637	C	A
NW_018164444.1	3944954	C	T
NW_018164444.1	3946011	T	C
NW_018164444.1	3958376	C	T
NW_018164444.1	3959900	C	A
NW_018164444.1	3959910	A	G
NW_018164444.1	3959914	A	C
NW_018164444.1	3959936	C	G
NW_018164444.1	3959944	T	A
NW_018164444.1	3959958	T	G
NW_018164444.1	3959968	T	C
NW_018164444.1	3959971	T	G
NW_018164444.1	3959974	G	A
NW_018164444.1	3959975	G	A
NW_018164444.1	3959990	G	T
NW_018164444.1	3959991	G	T
NW_018164444.1	3960128	C	A
NW_018164444.1	3960147	T	A
NW_018164444.1	3960148	A	G
NW_018164444.1	3960178	A	C
NW_018164444.1	3960191	C	A
NW_018164444.1	3960202	A	G
NW_018164444.1	3960207	C	T
NW_018164444.1	3960241	A	T
NW_018164444.1	3960253	T	C
NW_018164444.1	3960385	T	A
NW_018164444.1	3960523	T	C
NW_018164444.1	3961633	G	T
NW_018164444.1	3961948	G	A
NW_018164444.1	3962863	G	T
NW_018164444.1	3964265	A	G
NW_018164444.1	3964273	G	A
NW_018164444.1	4006759	G	A
NW_018164444.1	4006773	A	T
NW_018164444.1	4006779	T	C
NW_018164444.1	4006782	T	C
NW_018164444.1	4006789	C	A
NW_018164444.1	4012036	A	T
NW_018164444.1	4012046	A	G
NW_018164444.1	4012097	A	G
NW_018164444.1	4012305	C	T
NW_018164444.1	4012613	C	A
NW_018164444.1	4012614	T	G
NW_018164444.1	4012619	T	C
NW_018164444.1	4034201	C	A
NW_018164444.1	4034466	C	G
NW_018164444.1	4051370	T	A
NW_018164444.1	4064536	A	G
NW_018164444.1	4113399	C	T
NW_018164444.1	4114587	A	T
NW_018164444.1	4116113	G	A
NW_018164444.1	4116114	A	T
NW_018164444.1	4116146	C	T
NW_018164444.1	4116151	A	C
NW_018164444.1	4117149	T	C
NW_018164444.1	4117263	C	T
NW_018164444.1	4117303	C	T
NW_018164444.1	4117343	C	T
NW_018164444.1	4117377	C	T
NW_018164444.1	4117392	C	T
NW_018164444.1	4117715	T	A
NW_018164444.1	4117985	G	A
NW_018164444.1	4118432	G	A
NW_018164444.1	4118492	A	C
NW_018164444.1	4131707	A	G
NW_018164444.1	4131733	C	A
NW_018164444.1	4131737	T	A
NW_018164444.1	4131743	T	C
NW_018164444.1	4131765	A	T
NW_018164444.1	4131833	G	T
NW_018164444.1	4131865	T	G
NW_018164444.1	4131902	A	T
NW_018164444.1	4131903	A	T
NW_018164444.1	4131938	A	T
NW_018164444.1	4157764	C	G
NW_018164444.1	4157766	T	G
NW_018164444.1	4157780	C	T
NW_018164444.1	4158326	G	C
NW_018164444.1	4158327	C	T
NW_018164444.1	4158403	T	C
NW_018164444.1	4158412	A	G
NW_018164444.1	4158691	A	G
NW_018164444.1	4158815	A	T
NW_018164444.1	4158833	T	C
NW_018164444.1	4158835	T	C
NW_018164444.1	4159191	A	G
NW_018164444.1	4159192	G	T
NW_018164444.1	4159205	A	C
NW_018164444.1	4159801	T	A
NW_018164444.1	4160356	G	T
NW_018164444.1	4162952	T	C
NW_018164444.1	4162968	G	A
NW_018164444.1	4162983	G	T
NW_018164444.1	4162988	A	T
NW_018164444.1	4163113	T	A
NW_018164444.1	4163129	A	T
NW_018164444.1	4163294	T	C
NW_018164444.1	4163308	T	A
NW_018164444.1	4163324	C	A
NW_018164444.1	4163332	T	C
NW_018164444.1	4163333	A	T
NW_018164444.1	4163337	A	G
NW_018164444.1	4165741	T	G
NW_018164444.1	4165945	C	T
NW_018164444.1	4166032	G	A
NW_018164444.1	4166116	G	C
NW_018164444.1	4166134	T	C
NW_018164444.1	4166256	T	A
NW_018164444.1	4166268	G	A
NW_018164444.1	4166296	A	T
NW_018164444.1	4167226	C	T
NW_018164444.1	4167228	T	G
NW_018164444.1	4167243	T	G
NW_018164444.1	4167272	T	A
NW_018164444.1	4167583	T	C
NW_018164444.1	4168189	T	C
NW_018164444.1	4168201	C	A
NW_018164444.1	4179661	G	T
NW_018164444.1	4180597	C	T
NW_018164444.1	4180601	A	T
NW_018164444.1	4180604	T	C
NW_018164444.1	4180661	T	G
NW_018164444.1	4201187	A	G
NW_018164444.1	4201413	G	T
NW_018164444.1	4214506	T	A
NW_018164444.1	4215541	T	C
NW_018164444.1	4215620	A	C
NW_018164444.1	4215738	G	C
NW_018164444.1	4215739	A	C
NW_018164444.1	4215808	A	C
NW_018164444.1	4215950	C	G
NW_018164444.1	4215953	G	C
NW_018164444.1	4216237	T	C
NW_018164444.1	4216594	G	T
NW_018164444.1	4216596	G	A
NW_018164444.1	4216907	G	A
NW_018164444.1	4218623	G	A
NW_018164444.1	4218664	C	G
NW_018164444.1	4218667	A	G
NW_018164444.1	4237341	T	C
NW_018164444.1	4237403	T	G
NW_018164444.1	4237405	T	A
NW_018164444.1	4237406	T	A
NW_018164444.1	4237414	T	C
NW_018164444.1	4259360	G	A
NW_018164444.1	4317471	C	A
NW_018164444.1	4330080	A	G
NW_018164444.1	4336068	G	A
NW_018164444.1	4336885	A	T
NW_018164444.1	4340983	T	A
NW_018164444.1	4343110	G	T
NW_018164444.1	4343196	T	G
NW_018164444.1	4343317	G	A
NW_018164444.1	4344328	G	A
NW_018164444.1	4346106	T	G
NW_018164444.1	4346199	A	G
NW_018164444.1	4360875	G	A
NW_018164444.1	4368095	T	C
NW_018164444.1	4368125	A	G
NW_018164444.1	4368127	A	G
NW_018164444.1	4369148	A	G
NW_018164444.1	4369598	A	G
NW_018164444.1	4370588	T	C
NW_018164444.1	4370591	A	G
NW_018164444.1	4370598	A	T
NW_018164444.1	4370606	G	A
NW_018164444.1	4374697	A	G
NW_018164444.1	4374698	T	C
NW_018164444.1	4374699	T	A
NW_018164444.1	4374702	C	T
NW_018164444.1	4374709	A	G
NW_018164444.1	4374711	A	G
NW_018164444.1	4374836	G	A
NW_018164444.1	4374839	T	A
NW_018164444.1	4374849	T	G
NW_018164444.1	4386179	G	A
NW_018164444.1	4386186	G	A
NW_018164444.1	4386197	T	C
NW_018164444.1	4386203	G	C
NW_018164444.1	4386207	T	G
NW_018164444.1	4392532	G	C
NW_018164444.1	4392634	A	T
NW_018164444.1	4392724	A	G
NW_018164444.1	4392805	G	C
NW_018164444.1	4392811	C	A
NW_018164444.1	4392813	T	C
NW_018164444.1	4434411	G	A
NW_018164444.1	4434412	C	T
NW_018164444.1	4434416	G	T
NW_018164444.1	4434420	G	A
NW_018164444.1	4434424	G	A
NW_018164444.1	4434425	T	C
NW_018164444.1	4434427	G	A
NW_018164444.1	4479562	C	A
NW_018164444.1	4479598	A	C
NW_018164444.1	4479626	C	G
NW_018164444.1	4492799	C	T
NW_018164444.1	4492806	C	A
NW_018164444.1	4492842	A	G
NW_018164444.1	4492852	C	G
NW_018164444.1	4492855	G	C
NW_018164444.1	4492861	G	T
NW_018164444.1	4492866	A	G
NW_018164444.1	4492879	G	A
NW_018164444.1	4492887	C	T
NW_018164444.1	4492920	A	T
NW_018164444.1	4492948	A	C
NW_018164444.1	4495027	C	T
NW_018164444.1	4500871	C	T
NW_018164444.1	4502392	C	G
NW_018164444.1	4502393	G	A
NW_018164444.1	4502463	A	T
NW_018164444.1	4502853	A	G
NW_018164444.1	4502885	T	C
NW_018164444.1	4502888	T	A
NW_018164444.1	4503400	A	G
NW_018164444.1	4503892	T	C
NW_018164444.1	4503904	A	G
[truncated: 205,761+ more rows]

## Sheet: SNP_annotation
Table S8 Single Nucleotide Polymorphisms variation sites of annotation
CHROM	POS	REF	ALT	CHROM	STAR	END	GENE_ID	RELATIVE_POSITION
NW_018164443.1	8012	T	G	NW_018164443.1	8010	8298	LOC110018624	3
NW_018164443.1	8015	A	G	NW_018164443.1	8010	8298	LOC110018624	6
NW_018164443.1	8016	A	C	NW_018164443.1	8010	8298	LOC110018624	7
NW_018164443.1	8019	T	C	NW_018164443.1	8010	8298	LOC110018624	10
NW_018164443.1	8022	G	C	NW_018164443.1	8010	8298	LOC110018624	13
NW_018164443.1	8050	C	T	NW_018164443.1	8010	8298	LOC110018624	41
NW_018164443.1	8068	C	G	NW_018164443.1	8010	8298	LOC110018624	59
NW_018164443.1	8070	T	A	NW_018164443.1	8010	8298	LOC110018624	61
NW_018164443.1	8071	C	G	NW_018164443.1	8010	8298	LOC110018624	62
NW_018164443.1	8081	G	C	NW_018164443.1	8010	8298	LOC110018624	72
NW_018164443.1	8089	A	G	NW_018164443.1	8010	8298	LOC110018624	80
NW_018164443.1	8105	C	G	NW_018164443.1	8010	8298	LOC110018624	96
NW_018164443.1	8113	G	T	NW_018164443.1	8010	8298	LOC110018624	104
NW_018164443.1	32860	T	A	NW_018164443.1	32859	32963	LOC110019493	2
NW_018164443.1	34067	T	C	NW_018164443.1	34066	34196	LOC110019493	2
NW_018164443.1	41589	G	A	NW_018164443.1	41474	41841	LOC110020843	116
NW_018164443.1	60603	T	G	NW_018164443.1	60425	60912	LOC110021038	179
NW_018164443.1	60605	T	G	NW_018164443.1	60425	60912	LOC110021038	181
NW_018164443.1	92703	T	C	NW_018164443.1	92363	92706	LOC110017959	341
NW_018164443.1	97371	C	G	NW_018164443.1	96765	97934	LOC110021666	607
NW_018164443.1	97379	C	T	NW_018164443.1	96765	97934	LOC110021666	615
NW_018164443.1	97381	A	G	NW_018164443.1	96765	97934	LOC110021666	617
NW_018164443.1	97386	A	C	NW_018164443.1	96765	97934	LOC110021666	622
NW_018164443.1	108776	C	G	NW_018164443.1	108246	108869	LOC110019621	531
NW_018164443.1	108776	C	G	NW_018164443.1	108246	108869	LOC110019621	531
NW_018164443.1	121226	C	A	NW_018164443.1	119037	121515	LOC110022458	2190
NW_018164443.1	164544	A	T	NW_018164443.1	163731	164816	LOC110020071	814
NW_018164443.1	164544	A	T	NW_018164443.1	163731	164767	LOC110020071	814
NW_018164443.1	164576	A	G	NW_018164443.1	163731	164816	LOC110020071	846
NW_018164443.1	164576	A	G	NW_018164443.1	163731	164767	LOC110020071	846
[truncated: 44,778 more rows]

## Sheet: SNP_nonDEGs
Table S9 The number and frequency of SNP of non-DEGs
[truncated: 8,357 more rows]

[truncated: 2 more sheets: SNP_DEGs, SNP_key_gene]
