# Supplementary material for: Transcriptome analysis of flower color reveals the correlation between SNP and differential expression genes in Phalaenopsis
Source: Research Square preprint supplement (doi:10.21203/rs.3.rs-209376/v1), 2021-03-02
Supplement: Supplementary file 4 [file 9aaac892a254eaa981048a15.docx]

**Transcriptome analysis of flower color reveals the correlation between SNP and differential expression genes in *Phalaenopsis***

Yu Ding1,#, Ding-Hai Yang1,#, Ma-Yin Wang1,#, Dai-Cheng Hao2, Wei-Shi Li2, Peng Ling1,*, Shang-Qian Xie1,*

1. Key Laboratory of Ministry of Education for Genetics and Germplasm Innovation of Tropical Special Trees and Ornamental Plants, College of Forestry Hainan University, Haikou 570228, China

2. Hainan Boda Orchid Technology Co. Ltd. Haikou 570311, China

# These authors contributed equally to this work

* To whom correspondence should be addressed:

Peng Ling, Email: 18389807612@163.com;

Shang-Qian Xie, Email: [sqianxie@foxmail.com](mailto:sqianxie@foxmail.com)

Table S1. Functional annotation of unigene

| Database | No. of unigene | Percentage (%) |
| --- | --- | --- |
| Nr | 21,143 | 90.7 |
| Swiss-Prot | 15,062 | 64.6 |
| GO | 10,827 | 46.4 |
| KEGG | 9,854 | 42.3 |
| COG | 18,954 | 81.3 |
| Total | 23314 | 100 |

Table S3. Functional annotation of DEGs

| Database | No. of DEGs | Percentage (%) |
| --- | --- | --- |
| Nr | 1163 | 98.9 |
| Swiss-prot | 898 | 76.4 |
| GO | 474 | 40.3 |
| KEGG | 431 | 36.7 |
| COG | 882 | 75.1 |
| Total | 1175 | 100 |

Table S7. Statistics of variation types of SNP

| SNP type | Number of SNP | Percentage (%) |
| --- | --- | --- |
| G/A | 27947 | 13.45 |
| A/G | 27864 | 13.41 |
| C/T | 27738 | 13.35 |
| T/C | 27670 | 13.32 |
| T/A | 17876 | 8.60 |
| A/T | 17632 | 8.49 |
| G/T | 11887 | 5.72 |
| A/C | 11783 | 5.67 |
| C/A | 11762 | 5.66 |
| T/G | 11537 | 5.55 |
| G/C | 7067 | 3.40 |
| C/G | 6996 | 3.37 |
| total | 207759 | 100.00 |


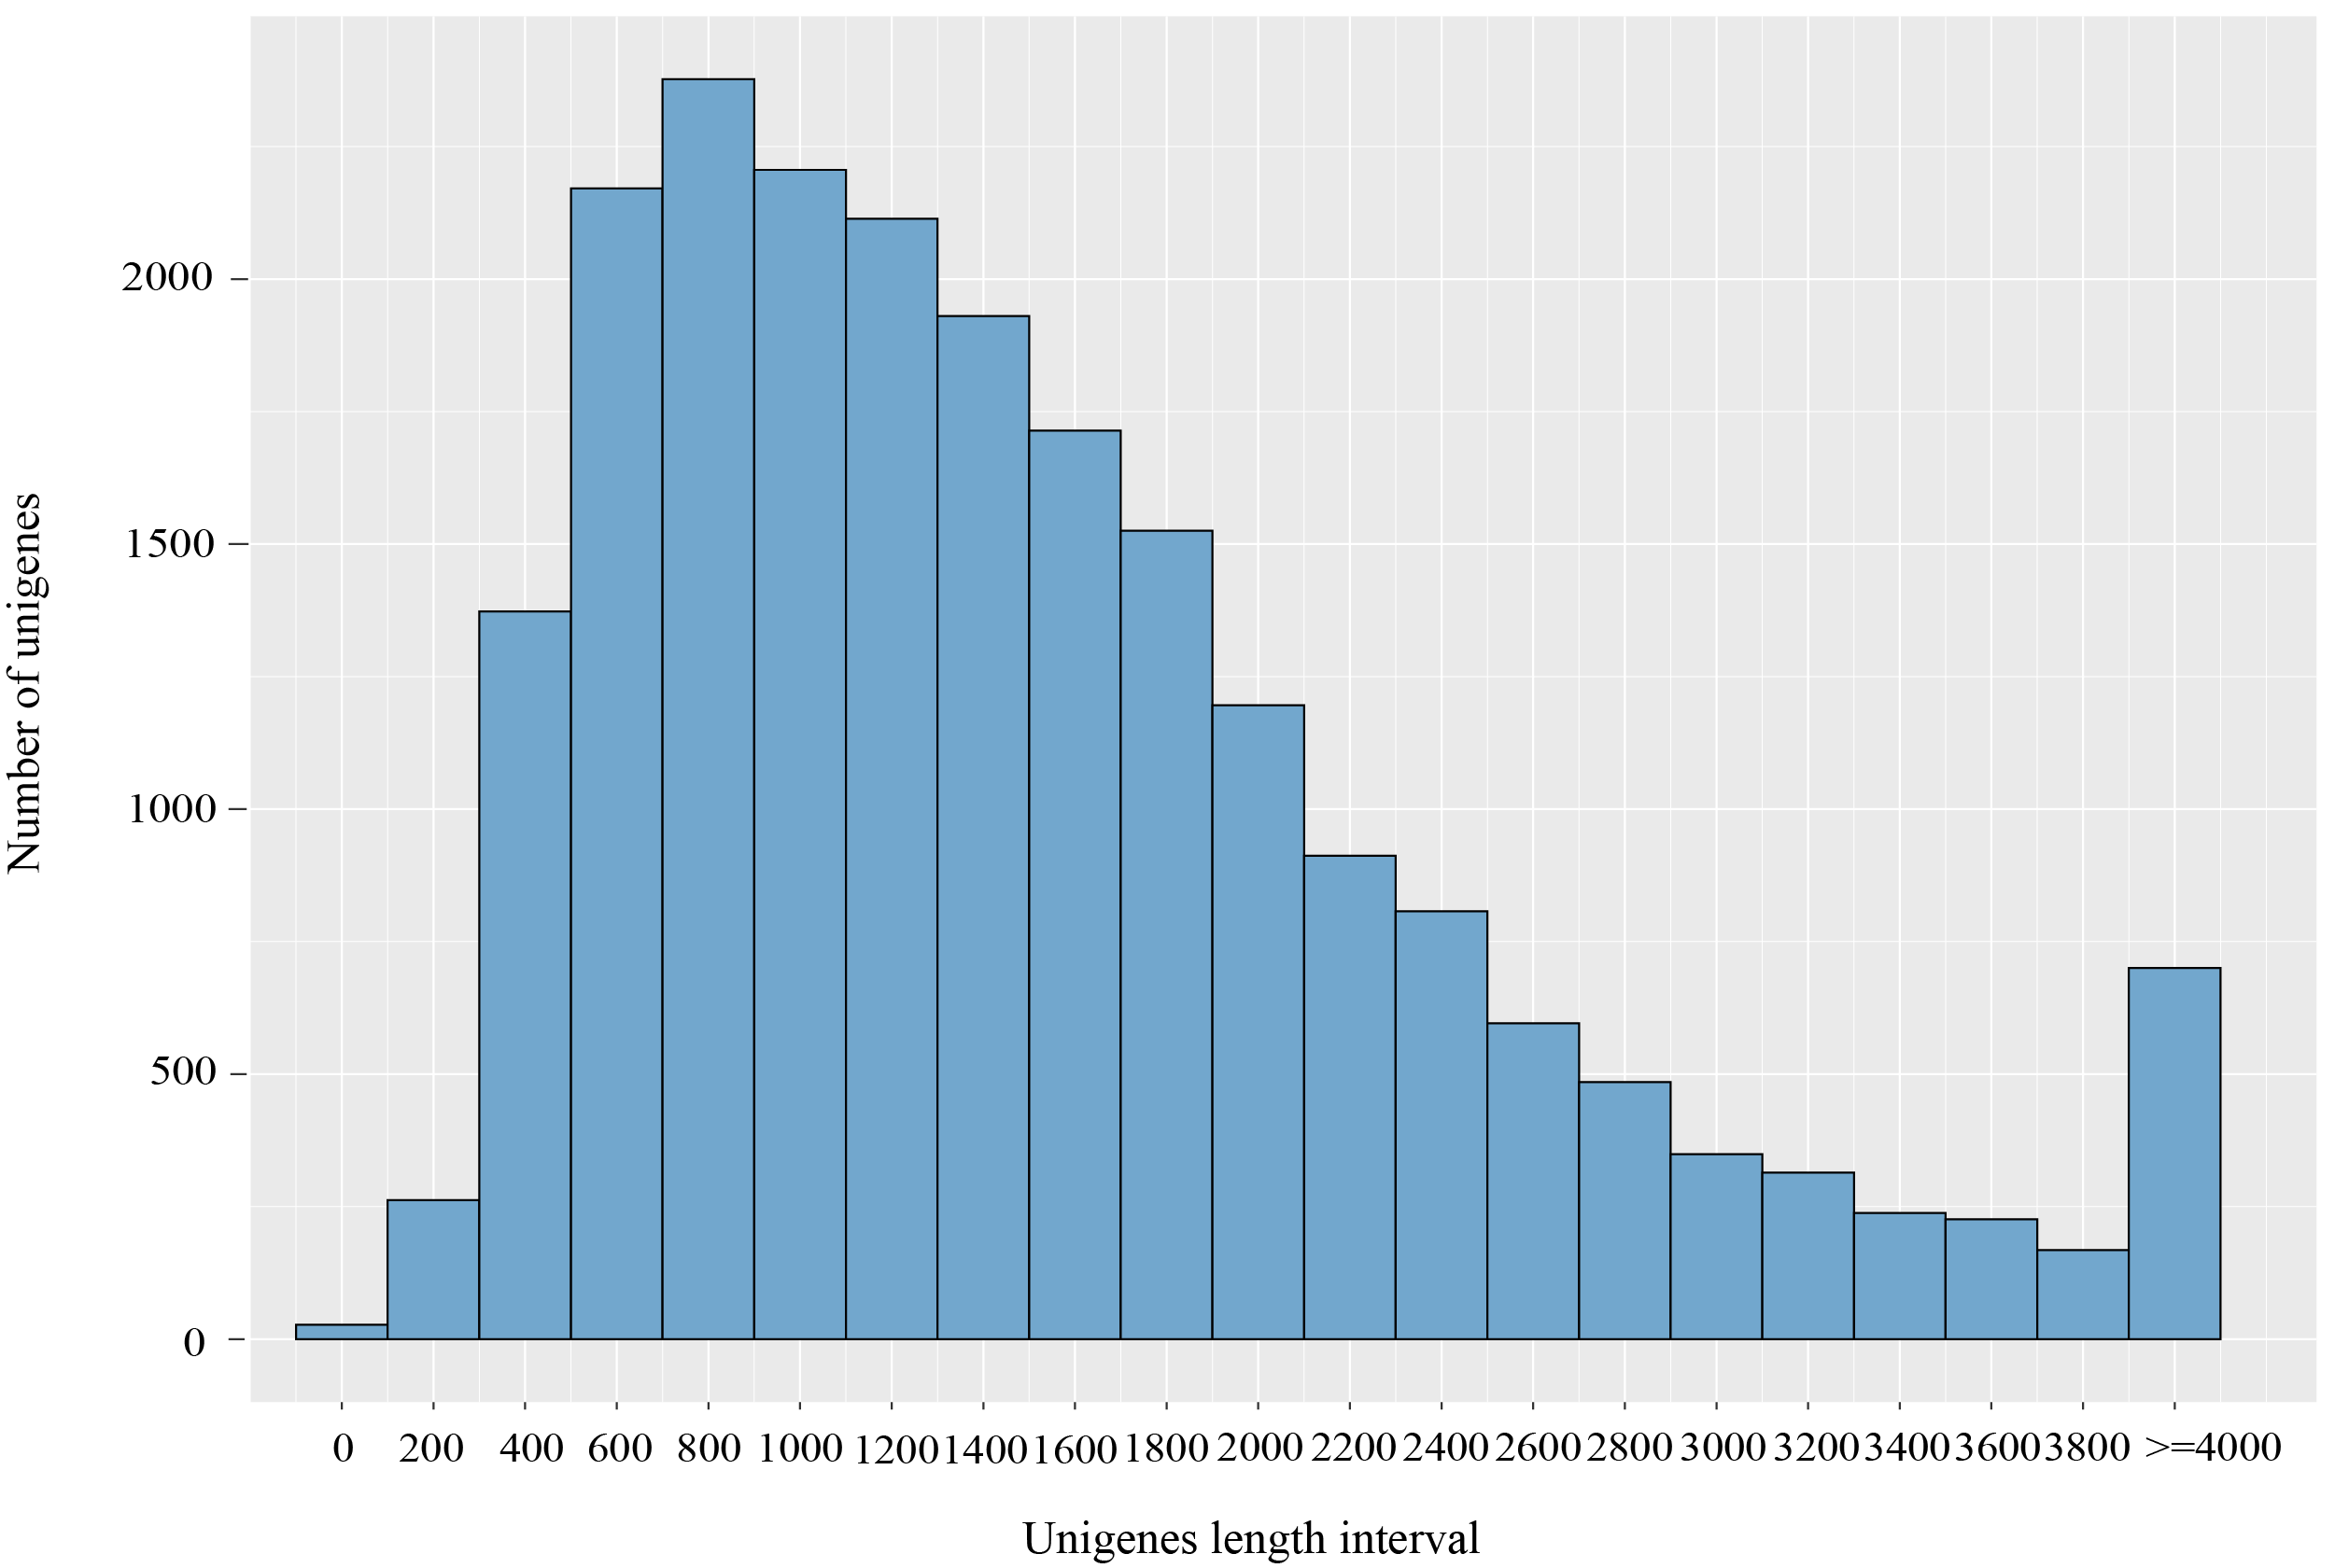


Figure S1 Distribution of unigenes length


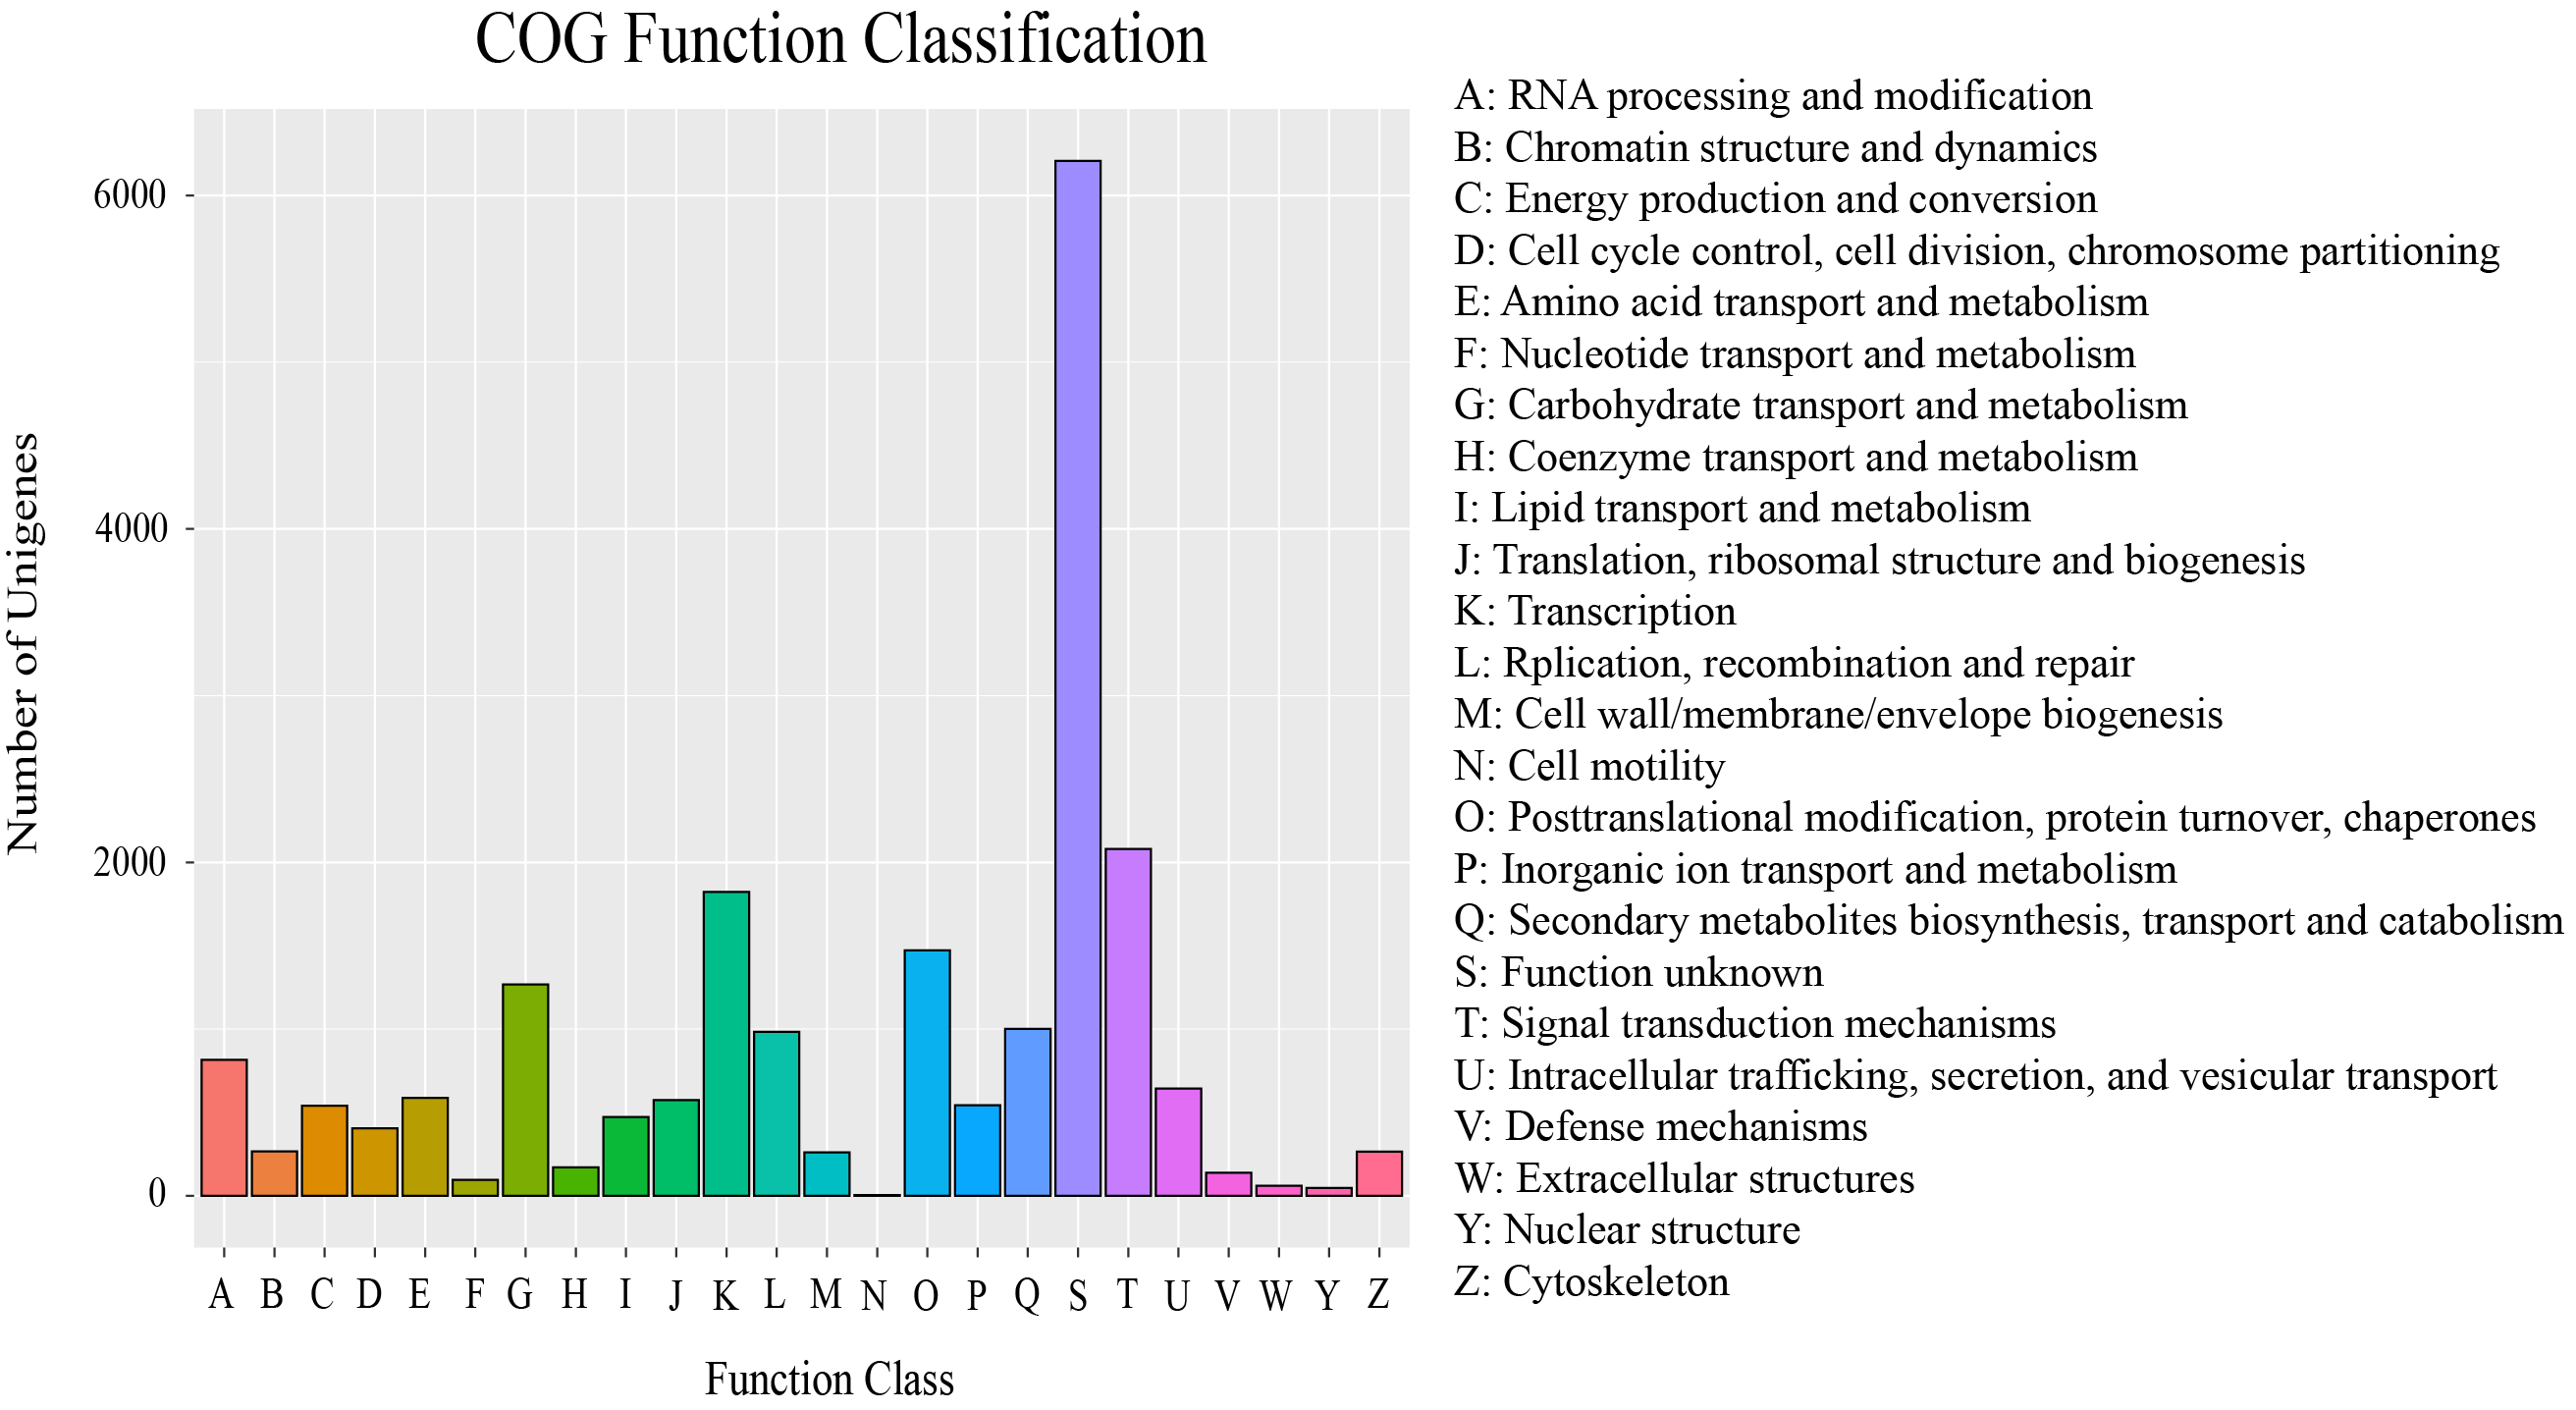


Figure S2 The COG annotation of unigenes


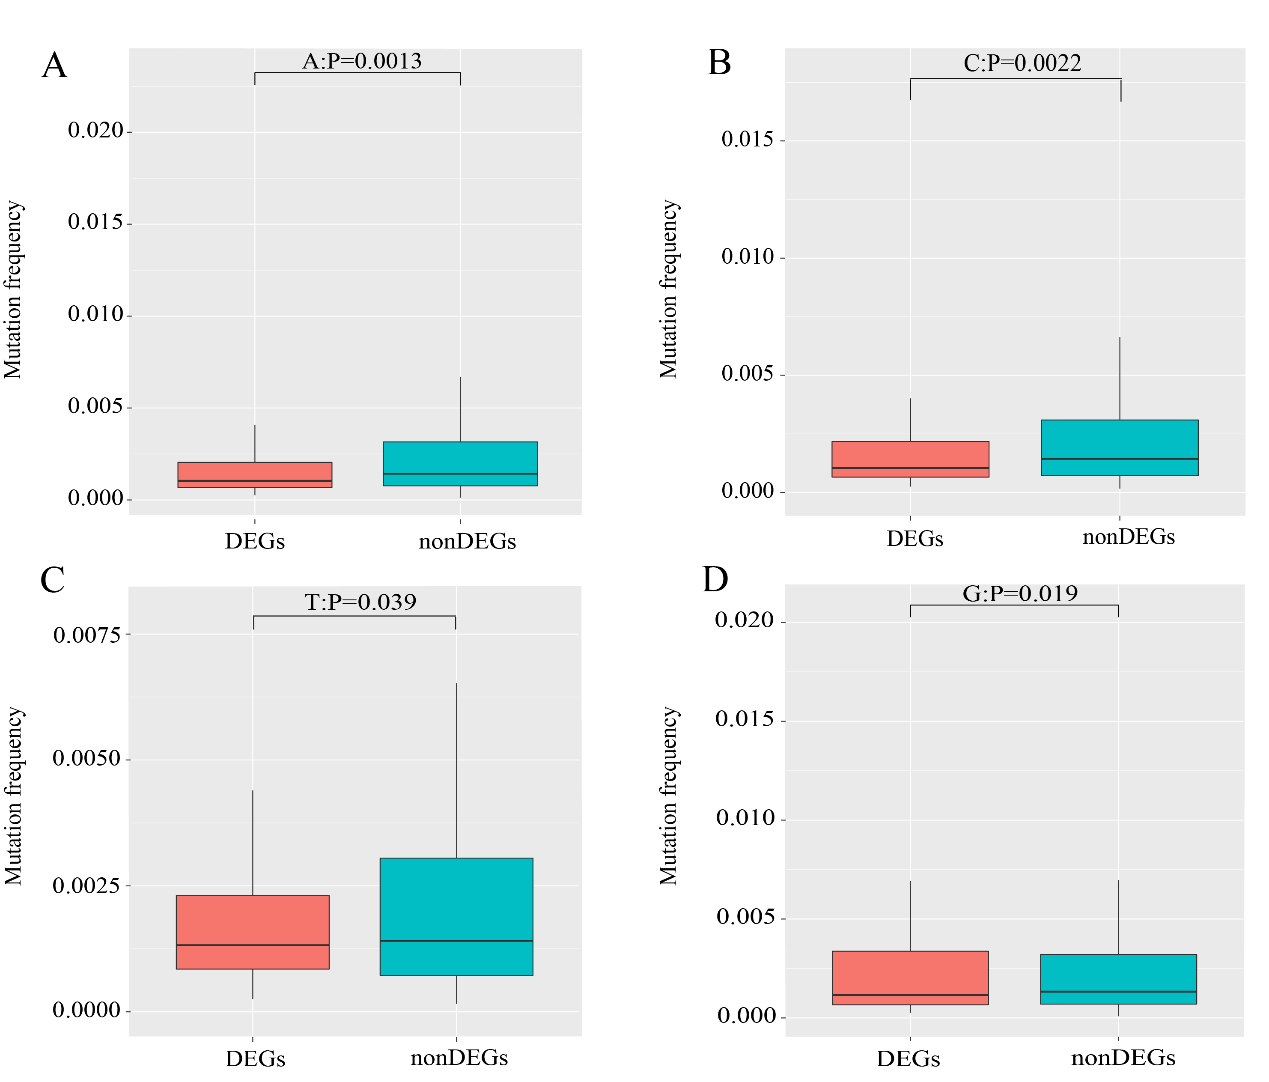


Figure S3 Comparison SNP mutation frequency between DEGs and non-DEGs in A, C, T and G four categories (A: A base; B: C base; C: T base; D: G base)
